# Supplementary material for: Uneven HAK/KUP/KT Protein Diversity Among Angiosperms: Species Distribution and Perspectives
Source: Front Plant Sci. 2016 Feb 9;7:127. doi: 10.3389/fpls.2016.00127 (PMC4746482; doi:10.3389/fpls.2016.00127)
Supplement: TABLE S1 — | List of HAK/KUP/KT sequences used in Figure 1 (Excel file). [file Data_Sheet_1.XLSX]

## Sheet: Angiosperms
Genome No.	Seq No.	Group	Order	Common name	Species	Number	Gene name	Cluster	Accession / Locus	Protein Sequence
1	1	Dicotyledons	Solanales	Tomato	Solanum lycopersicum	1	SlHAK1	V	Solyc01g105150.2.1	MTDEGLERENGGLTSMESIESRWVFQDEDDLDIDSGDRDTVDGDDDSTTCNGMELESDDEDNVEQKLIRTGPRIDSFDVEALEVPGVQKNDFEDVSVGRAILLAFQTLGVVFGDVGTSPLYTFSVMFSKAPVNCNEDVLGALSLVLYTLILIPLVKYVLIVVWANDDGEGGTFALYSLLCRHAKVNLLPNQLRSDARISSFRLKVPSPELERSLKIKERLEASLTLKKLLLMLVLVGTSMVIADGVVTPAMSVMSAVGGLKVGLSGVKQDQVVMISVACLVILFSVQKYGTSKVGLVVGPALFIWFCSLGGIGVYNLIKYDSHVWRAFNPVHIYYYFKRNSAKAWYSLGGCLLCATGSEAMFADLCYFSVRSVQLTFMFLVLPCLLLGYLGQAAYLMEN…
1	2	Dicotyledons	Solanales	Tomato	Solanum lycopersicum	2	SlHAK2	III	Solyc02g031840.2.1	MEIDEENNENKGGMWDLEQKLDQPMDEEAGRLRNMYREKKFSTLLLLRLAYQSLGVVYGDLGTSPLYVYNNTFPHGIQDPEDVIGALSLIIYSLTLIPLLKYVFIVCRANDNGQGGTFALYSLLCRQAKINTIPNQHRTDEELTTYSRSTFHEHSFAAKTKRWLEAYPYRKNALLILVVVGTCMVIGDGILTPAISVLSASGGIKVDHPKMSNDVVVVVAVIILVGLFSLQHYGTDRVGWLFAPIVLLWFLLVGGIGIYNIWKYDSSVLRAFSPVYIYRYFKRGKRDGWTSLGGIMLSITGTEALFADLAHFPVSAIQLAFTVIVFPCLLLAYSGQAAYLMQNTDHVVDAFYRSIPESIYWPVFVIATLAAIVASQATISATFSIIKQALALGCFPRVK…
1	3	Dicotyledons	Solanales	Tomato	Solanum lycopersicum	3	SlHAK3	III	Solyc02g068590.2.1	MASGMGLDEDNGETKGGMWDLDQKIDQPMDEEAGRLRNMYREKTFSSLLLLRLAFQSLGVVYGDLGTSPLYVFYNTFPHGIDDTEDVIGALSLIIYSLTLIPLLKYVFIVCRANDNGQGGTFALYSLLCRHAKIKTIPNQHRTDEELTTYSRSTFHEHSFAAKTKRWLEAYPFRKTSLLILVVIGTCTVIGDGILTPAISVLSASGGIKVDHPKMSNDVVVIVAVIILVGLFSVQHYGTDRVGWLFAPVVLLWFLLVGGIGIFNIWKYDSSVVRAFSPVYIYRYFRRRKKDGWTSLGGIMLSITGTEALFADLANFPVSAIQLAFTVIVFPCLLLTYMGQAAYLMQNKEHVVDAFYRSIPDSIYWPVFIVATLAAIVASQATITATFSIIKQALAHGCF…
1	4	Dicotyledons	Solanales	Tomato	Solanum lycopersicum	4	SlHAK4	II:c	Solyc02g087000.2.1	MDIESWVIFDNPILLQKESWRTVIALAYQSLGVVYGDLSTSPLYVYKSTFAEDIQHSESNDEIFGVLSFVFWTLTLIPLLKYVFIVLRADDNGEGGTFALYSLLCRYTRVSTLPNGQLADEDLYEYKNDRNLSADRIGMSLKSTLEKHRFLKKILLILALIGTCMVIGDGVLTPAISVFSAVSGLELSMAKHHHQYVEVPVACVILVFLFFLQHYGTHRLGFLFAPIVITWLLCISAIGVYNIIHWNPHVYQALSPYYMYKFLKKTQRGGWMSLGGILLCITGSEAMFADLGHFSQLSIKIAFTFVVYPSLILAYMGQAAYLSKHHVIASDYHIGFYVSVPEKLRYPVLAIAILAAVVGSQAIITGTFSIIKQCSALGCFPRVKIVHTSSKIHGQIYIP…
1	5	Dicotyledons	Solanales	Tomato	Solanum lycopersicum	5	SlHAK5/LeHAK5	I:a	Solyc12g005670.1.1	MESTKSEEEVNVGQQQLKDRKVSWAKLGRVDSLNMEAGKVSSTQARHGSKGDWKTILSLAFQSVGVIYGDIGTSPLYVFASTFTDEIKHKDDILGVLSLIIYTIMLVPMTKYVFIVLWANDNGDGGAFALYSLLCRYAKVSLIPNQQPEDRELSHYSLDLPSNHIKRAQRIRQGLEKSKFAKIFLVFLAILGTSMVIGDGVLTPCISVLSAVSGIKPLGQDAIMGISIAILVILFSLQRMGTDKVGYTFAPAICVWFLFISGIGLYNLFKYDVTVLRAFNPMYIIHYFKRNGKKGWISLGGVFLCITGSEAMFADLGHFSVRSIQISFSCLVFPALLSAYSGQAAYLTKFPENVANTFYDCIPGPLYWPTFVVAVAAAIIASQAMISGTFSIVAQAQNV…
1	6	Dicotyledons	Solanales	Tomato	Solanum lycopersicum	6	SlHAK6	II:c	Solyc04g025880.2.1	MDLETGFYQNRLKKESWRTVLTLAYQSLGVVYGDLSTSPLYVYTSTFAEDIKHSETNEEVYGVLSFIFWTLTLIPLLKYVFIVLKADDNGEGGTFALYSLLCRHAKVNSLPNSQLADEKLSTYKKNDINIPAQTTFGAKIKSMLERHRVLQRLLLVLSLGGASMVIGDGVLTPAISVFSAISGAELSLGKTHHLYIEVPVACVVLIALFALQQYGTHRVGFLFAPIVVTWLLCISGIGLYNIIHWNPTVYRALSPYYVYKFLKKTQKGGWMSLGGILLCITGSEAMFADLGHFSQLSIKIAFTSLVYPSLVLAYMGQAAYLSRHHVTENDYQIDFYVSVPGKLRWPVLVIAVLAAVVASQAAITGTFSIIKQCCALGCFPRVNIVHTSSKIHGQVYIPE…
1	7	Dicotyledons	Solanales	Tomato	Solanum lycopersicum	7	SlHAK7	V	Solyc04g025990.2.1	MEKEEIEEESSNRVGLLKRCTTGGSTGSTRWVDGSEVDSESSQSWSLFGDEEITKQGYGSVRRRLVKKPKRLDSFDVEAMEISVAHGNHHKKEASLLSTLALAFQTLGVVYGDMGTSPLYVFSGVFSKVPITSEVDVLGALSIVLYTIALIPLMKYVFIVLKANDSGEGGTFALYSLICRYANVNLLPNRQPADEHISSFKLKLPTPELQRALNIKEVLERKSSLKTLVLLLVLMGTSMIIGDGILTPAISVMSAVSGLQGRVPGFGTNALVFTSIIILGVLFSIQRYGSSKVGFTFAPALALWFFSLGAVGVYNLLKHDVTVLRALNPFYIYLFFKKNSINGWSALGGCVLCITGAEAMFADLGHFSVKSIQIAFTSVVFPCLFLAYFGQAAYLMKFP…
1	8	Dicotyledons	Solanales	Tomato	Solanum lycopersicum	8	SlHAK8	V	Solyc05g005720.2.1	MSSKEEIEENSVSEGLLLRRNGSNGGGSSGSLRWVDGSEVNDNQEEVYDKNEEIIRENNYGSVRRRLKKPKRVDSLDVESMQIKGGNGGSQHIKDVPLLATLSLAFQTLGVVYGDMGTSPLYVFSDVFSKVHITSEVDVLGALSIVLYTIALIPLMKYVFIVLKANDNGEGGTFALYSLICRYANVNLLPNRTPADECISSFKLRLPTPELQRAVYIKEILERKSLLKTILLLLVLMGTSMIIGDGILTPAISVMSAVSGLEGRIPGFNTDALVIISIIILGGLFSIQRFGSSKVGFTFAPALALWFFCLGSIGIYNLLKFDVTVVRAVNPTYIYLFFKKNSTNGWSALGGCVLCITGAEAMFADLGHFSVLSIQIAFTSVVFPCLLLAYLGQAAFLMK…
1	9	Dicotyledons	Solanales	Tomato	Solanum lycopersicum	9	SlHAK9	II:c	Solyc05g005740.2.1	MDLETGVNQNRVKKESWKTILTLAYQSLGVVYGDLSTSPLYVYKSTFAEDITHSESNEEIYGVLSFVFWTLTLVPLLKYVFIVLKADDNGEGGTFALYSLLCRHAKVNSLPSCQLADEDLSSYKKDNIISPAPTTFGATLKSTLERHRVLQRFLLVLALIGACMVIGDGILTPALSVFSAVSGIELAIGKEHHKYVEVPLTCVILIALFALQHYGTHRVGFLFAPVVITWLMCISAIGVYNIITWDRHVYRALSPYYMYKFLKKTQRGGWMSLGGILLCITGSEAMFADLGHFSQLSIQIAFTFMVYPSLILAYMGQAAYLSQHHIIESESYGIGFYVSVPEILRLPVLVIAILAAVVGSQAIITGTFSIIKQCSSLGCFPRVKIVNTSSKIHGQIYIP…
1	10	Dicotyledons	Solanales	Tomato	Solanum lycopersicum	10	SlHAK10	II:c	Solyc06g050170.2.1	MDIDYGKCWDTSKKSWKSTLILAYQSLGVVYGDLSISPLYVYKSTFAEDIHHSETNEEIFGVLSFVFWTLTLVPLFKYVFIVLRADDNGEGGTFALYSLICRHAKVSLLPNRQVADEALSTYKLEHPPEMKNSSKLKLLLEKHKSLHTALLILVLLGTCMVIGDGLLTPAISVFSAVSGLELSMSREHHQYAVIPITCFILICLFALQHYGTHRVGFCFAPIVMTWLLCISALGLYNIIHWNPQVYKALSPYYMVKFLKKTRKGGWMSLGGILLCITGSEAMFADLGHFSYTAIQIAFTFLVYPALILAYMGQAAFLSKHHHTIHKIGFYVSVPDVVRWPVLVIAILASVVGSQAIISGTFSIINQSQSLGCFPRVKVVHTNAKIHGQIYIPEINWILM…
1	11	Dicotyledons	Solanales	Tomato	Solanum lycopersicum	11	SlHAK11	II:a	Solyc08g015680.1.1	MQHNVEQPPPTSAGGAQETVIIVGQEEQPQLERKKRKLASKFPLVNISGNILLAYQSLGVVYGDLSTSPLYVYKSIFVGKLQDYQTPETIFGAFSLIFWTITLIPLIKYVLIVLSADDNGEGGTFALYSLLCRHAKFSLLSNQQAADEELSAYKYGFAGQSTSCLGLKRFLEKHKKSCTVLLIIVLLGACMVIGDGIITPAMSVISAMSGIKAAAEHLSHGEVLVLSCLILVGLFALQHFGTHRVGFLFAPIVVIWLISIFGIGLYNIIIWNPKIVHALSPYYIIKFFRETRKHGWFSLGGVLLSVAGTEAMFADLGHFTSCSMRIAFSFLVYPCLVVQYMGQAAFLSKNLASVPDSFYNSIPDSVYWPVFVIATLASIVASQSIITATFSIVKQLNAL…
1	12	Dicotyledons	Solanales	Tomato	Solanum lycopersicum	12	SlHAK12	I:b	Solyc09g074790.1.1	MSSNEQNQDILQQEGKFFSGKTLKRHDSLELESSKVPGVKKALEWSVILKLAFQSIGVVYGDIGTSPLFVFATVFPNGVKLEDDILGALSLIFYTITLIPLIKYVFIVLQANDNGDGGTFALYSLICRYSKVGLIPSQQPEDKDVSTFKLDLPDRRTRRASKLKSKLENSNFAKFFMLIATMLGTSMVIGDGILTPCIAVLSAVGGLKAAAPSVFTEGRLIWIAVAILILLFMFQRFGTENVGNTFASILSLWFIFIAGIGIYNMVKYDPTVIRALNPKYIIDYFKRNKKNAWISLGGVVMSITGGEALFADVGHFSVLSIQISMCCVTYPALILAYLGQAAFLMKNIDDVADTFYKSIPHSLYWPVFIVAVLAAIIASQALISGTFSIIQQSLALGCF…
1	13	Dicotyledons	Solanales	Tomato	Solanum lycopersicum	13	SlHAK13	I:b	Solyc09g074800.2.1	MSSNVRNQEVPRYQLNGKELSGNSLKRYDSLDLESSKVPGTKKAVEWTVILKLAFQSIGVVYGDIGTSPLYVFASIFPNGVTYHEDILGALSLIFYTITLIPLIKYVFIVLRANDNGDGGTFALYSLICRYSKVGLIPSQQPEDKDVSNFKIDLPDRRTRRASKLKSNLESSNFAKFVLLIATMLGTSMVIGDGILTPCISVLSAVGGLKAAAPSQLTEGRLVWIAVAILLLLFMFQRFGTEKVGNTFAPILCLWFIFIAGIGLYNFVKYDPTVIRALNPKYIIDYFKRNRKNAWISLGGVVMCITGGEALFADVGHFSVRSVQISMCCVTYPALILAYLGQAAFLRKNIDDVADTFYKSIPNGLYWPVFAVAVLAAIIASQALISGTFAIIQQSLALG…
1	14	Dicotyledons	Solanales	Tomato	Solanum lycopersicum	14	SlHAK14	I:b	Solyc09g074820.2.1	MGSNIEDNQEDVPMELQLKGKKPSSQKLKRHDSLDVEASKLPDAKKVVGMSVLLKLAFQSIGVVYGDIGTSPLYVFSTIFLEGVKHEEDILGALSLILYTITLIPVVKYVFIVLQANDNGDGGTFALYSLICRYSKVGLIPSTMAEDSDVSTFKLDMPDRRTRRASQLKSMLENSQFAKFFLLIATMLGTSMVIGDGVLTPCISVLSAIGGVKAAAPDAMTEDRIVWLAVAILILLFMFQRFGTEKVGYTFAPILCLWFVLIAGIGVYNFVIYDIAIFRALNPMYIVTYFQRNGKDAWVSLGGVVMCITGAEALFADVGHFSVRSVQISMCFVTYPALILAYFGQGAYLMKNSGDVANTFYASIPKPIYWPMFVIAVFAAIIASQALISGTFAIIQQSL…
1	15	Dicotyledons	Solanales	Tomato	Solanum lycopersicum	15	SlHAK15	V	Solyc10g047270.1.1	MVEMGSEREKDLENNGGLTATDSIESRWVFQDVYDSDMDSGDHGTDDGSTPRNDLELDSDDDDDNAMRKLIRTGPRIDSFDALEVPGAQRNDFDDVSAGRKILLAFQTLGVVFGDVGTSPLYTFSVMFSKAPVNGNEDVLGALSLVLYTLILISLVKYVLIVLWANDDGEGGTFALYSLLCRHAKVNLLPNQLASDARVSGFRLKVPSPELERSLKIKERLEASLTLKKLLLMLVLAGTAMVIADGVVTPAMSVMSAVGGLRVGVSGVKQDQVVMISVAFLVILFSVQKYGTSKMGHFVGPALFIWFCSLGGIGVYNLIKYDSSVWRAFNPVHIYYYFKRNSTKVWYSLGGCILCATGSEAMFADLCYFSVRSVQLTFVFLVLPCLLLGYLGQAAYLME…
1	16	Dicotyledons	Solanales	Tomato	Solanum lycopersicum	16	SlHAK16	II:c	Solyc03g097860.1.1	MDPSQSLVSIHYAIKKETWRHTVVLSFQSLGVVYGRLSTTPLYAFGSIDPCHIKSGQQIYELFSFVFWTLTIIPLLKYAFIVFKADDNGEGGTFALYSLLCRRANVGLLPSDTSFTELMHLEEGTPSKMKAESRARRAIGRYKSSHYLLLLLALLGSCLIICDGIFTPALSVYSATSNLRRSLSKFAPRFTSSENARQSVDKYLKRFIPVPVACAILVCLFMLQRYGTNRIGVIFAPIVIVWLVFTSGFGLYNIIHHPQILWAISPTYMFRFIKKIDMTSLKLLSNIVLCIAGSEAMFADLGHFSKRSIKVTFIFLVYPALVLCYAGQAAFFSQHLGSSDDVAHLSESVTHIINCSGHLQHIFTILSLFASLVGSQATITASFSIINQCQALACFPRVK…
1	17	Dicotyledons	Solanales	Tomato	Solanum lycopersicum	17	SlHAK17	I:a	Solyc12g005680.1.1	MATLDSENKLKGRKVSWTKLHRVDSLNVEAGKVSLTPSGHASKGDWKTLLSLAFQSVGVIYGDIGTSPLYVFSSTFTDEIKHKDDILGVLSLIIYTITFIPMTKYVFTVLWANDNGNGGSFALYSLICRYAKVSLIPNHEPEDRELSHYDLDIPSNPFKRAQKIRHKLENSIFAKIGLVFLAILGTCMVIGDGVLTPCISVLSAVSGIKPLGQESIMYISIAILVALFCFQRFGTDKVGYTFAPAISVWFLFISGIGLYNLFKYDIGVLRAFNPMYIFHYFKRNGKNGWLSLGGVFLCITGSEAMFADLGHFSVRSIQISFSCLVFPSILSAYIGQAAYLTKNPGDVGNAFYASVPVALYWPTFVVAVVAAIIASQAMISGAFSIVAQAHSQGCFPRVK…
1	18	Dicotyledons	Solanales	Tomato	Solanum lycopersicum	18	SlHAK18	II:a	Solyc12g017910.1.1	MEQPPSPAAGQTQLERRKGTLASKFMLVNISSNLLLAYQSLGVVYGDVGTSPLYVYRSIFVGKLQNYQTSEAIFGAFSLIFWTITLIPLLKYVFVVLSADDNGEGGTFALYSLLCRHAKFSLLPNQQAADEELSAYKYGFSGQSTSCLSLKRFLEKHKKSRTILLIVVLLGACMVIGDGVLTPAMSVISSMSGIQAATEHLSHGGVLILSCIILVGLFALQHSGTHRVGFLFAPIVTIWLISIFLIGLYNTIFWNPKIVSALSPYYIVKFFKETGKDGWVSLGGVLLSIAGSEAMFADLGHFTATSMRIAFPFFVYPCLVVQYMGQAAFLSKNIDSIPNSFYNSVPDSLYWPVFVIATLSAIVGSQAVITATFSIVKQCNALGCFPRVKIVHTSKHIKG…
1	19	Dicotyledons	Solanales	Tomato	Solanum lycopersicum	19	SlHAK19	II:a	Solyc12g096580.1.1	MYQVGIHHDGDSLEHPPSLADGGAHVSVDTVGEDGKGGQTPEGKRKTELPSKFPFLNISRNLVLAYQSLGVVYGDLSTSPLYVYRSVFDGKLQDHQSPETIFGAFSLIFWTITLIPLLKYVFIVLCADDNGEGGSFALYSLLCRHAKFSLLPNQQAADEELSSYKYGFSGRSTAGFQLKRFLEKHKKSRTVLLVIVLLAACMVIGDGVLTPAMSVISSMSGIQAAADRLTHDEVVFLSCIILVGLFALQHSGTHRVGFLFAPIVLIWLISIMIIGLYNTIIWNPKIVSAFSPYYIIKFFRDTGKDGWISLGGILLSVAGTEAMYADLGHFSAFSMRITFAFVVYPCLVIQYMGQAAFLSKNLDSIPNSFYSSIPDGVYWPVFVIATLAAIVGSQSIITA…
1	20	Dicotyledons	Solanales	Tomato	Solanum lycopersicum	20	SlHAK20	IV	Solyc04g008450.2.1	MDRQTGRPDLTAAAAAQSDAAVTVAVHDGETINNDQKDHSRWETLVLAYKTLGVVFGGLVTSPLYVYPSMPLKSPTEDDYLGIYSIMFWTLSLIGVVKYATIALQADDQGEGGTFALYSLLCRNINIGILSSKSASLNSSHSYVNQSKKPSRLGKFCERSLIARRVLLFIAMLGMCMLIGDGILTPAISVLSAMGGLRARFSSVSKSLVEGLSAIILIVLFLLQKFGTSRVSFLLSPIMGAWTLTTPLIGIYSIIKHYPSIFKAISPHYIALFFLRNGKQGWIYLGGTVLCITGSEAMFADLGHFNRSSIRIAFLYTIYPSLVLTYAGQTAYLIRNPDDHFDGFYKFIPSAVYWPIFVIATLAAIVASQSLISATFSVIKQSVVLDYFPRVKVVHTSSS…
1	21	Dicotyledons	Solanales	Tomato	Solanum lycopersicum	21	SlHAK21	IV	Solyc06g051830.1.1	METYRTAIQAYHSPLKKAKEYPPMQTLLLAYQSLGVVYGDLATSPVNVFSSTRLTNLTEDDLLGTFSLIFWTLTLLVLVKYVFIVLHANDHGEGGTFALYSYLCRHINFQSKLSIHNVRMESDERMAFYSHESGSSLRSKTKKFLERNSAAQNVLTFVVLLGTCMVIGDGALTPATCVLSALQGIQSLSSKISQDHVVLMSVIMLIALFTFQRCGTSKVSFCFTPVMLLWFVTNVSVGIYNILEYYPSVLKAISPHYIVKFVSRNGKTAWNLLGAVFLRAEAMFADLGHFNKRAIQLAFSFVVYPSLVLSYAGETAYLVRYPENINNAYYSSLPKSVYWPMFVISTLAAVVASQSMISATFSIVKQSLALGCFPRVNIIHTSKHEGQIYSPEVNCILMI…
2	22	Dicotyledons	Solanales	Potato	Solanum tuberosum	1	StHAK1	I:a	PGSC0003DMT400035722	MESTNSEEEVNEGQQQLKDKKVSWAKLGRVDSLNMEAGKVSSTQATHASKANWKTILSLAFQSVGVIYGDIGTSPLYVFSSVFSDKIEHKDDILGVFSLIIYTIMLVPMTKYVFIVLWANDNGDGGAFALYSLLCRYAKVSLIPNQQPEDRELSHYSLDIPSNHIKRAQRVRQTLEKSKFAKIFLVFLAILGTSMVIGDGVLTPCISVLSAVSGIKPLGQDAIMGISIAILIVLFSVQRLGTDKVGYAFAPAICIWFLFISGIGLYNLFKYDVTVLRAFNPMYIIHYFKRNGKKGWISLGGVFLCITGSEAMFADLGHFSVRSIQISFSCLVFPALLSAYCGQAAYLTKFPENVENTFYDSIPGPLYWPTFVVAVAAAIIASQAMISGTFSIVAQAQSV…
2	23	Dicotyledons	Solanales	Potato	Solanum tuberosum	2	StHAK2	I:b	PGSC0003DMT400029616	MGSNIEDNQDDVPMELQLKGKKSSSQKLKRHDSLDVEASKMPNAKQVVGLSVLLKLAFQSIGVVYGDIGTSPLYVFSSIFLEGVKHEDDILGALSLILYTITLIPVIKYVFIVLQANDNGDGGTFALYSLICRYSKVGLIPSTMAEDSDVSTFKLDMPDTRTRRASHLKSMLENSQFAKFFLLIATMLGTSMVIGDGVLTPCISVLSAIGGVKAAAPEAMTEGRIVWLAVAILIILFMFQRFGTEKVGYTFAPILCLWFVLIAGIGVYNFVIYDIAIFRALNPMYIVSYFQRNGKDAWISLGGVVMCITGAEALFADVGHFSVRSIQISMCFVTYPALILAYLGQGAYLMKNADDVANTFYASIPKTIYWPMFVIAVLAAIIASQALISGTFAIIQQSL…
2	24	Dicotyledons	Solanales	Potato	Solanum tuberosum	3	StHAK3	V	PGSC0003DMT400035898	MGEEEIEEENSNRVGLLRRCTTGGSTGSTRWVDGSEVDSESSPSWSLFGDEEIVKQGYGSVRRRLVKKPKRLDSFDVEAMEISVAHGSHHKKEASLLSTLALAFQTLGVVYGDMGTSPLYVFSGVFSKVPITSEVDVLGALSIVLYTIALIPLMKYVFIVLKANDSGEGGTFALYSLICRYANVNLLPNRQPADEHISSFKLKLPTPELQRALNIKEVLERKSSLKTLVLLLVLMGTSMIIGDGILTPAISVMSAVSGLQGRVPGFGTNALVFTSIIILGVLFSIQRYGSSKVGFTFAPALALWFFSLGAIGVYNLLKHDVTVLRALNPAYIYLFFKKNSINGWSALGGCVLCITGAEAMFADLGHFSVKSIQIAFTSVVFPCLFLAYFGQAAYLMKFP…
2	25	Dicotyledons	Solanales	Potato	Solanum tuberosum	4	StHAK4	III	PGSC0003DMT400046034	MEIDEENNENKGGMWDLEQKLDQPMDEEAGRLRNMYREKKFSTLLLLRLAYQSLGVVYGDLGTSPLYVYNNTFPRGIEDPEDVIGALSLIIYSLTLIPLLKYVFIVCRANDNGQGGTFALYSLLCRQAKINTIPNQHRTDEELTTYSRSTFHEHSFAAKTKRWLEAYPYRKNALLILVVVGTCMVIGDGILTPAISVLSASGGIKVDHPKMSNDVVVVVAVIILVGLFSLQHYGTDRVGWLFAPIVLLWFLLVGGIGIYNIWKYDSSVLRAFSPVYIYRYFKRGKRDGWTSLGGIMLSITGTEALFADLAHFPVSAIQLAFTVIVFPCLLLAYSGQAAYLMQNTDHVADAFYRSIPESIYWPVFVIATLAAIVASQATISATFSIIKQALALGCFPRVK…
2	26	Dicotyledons	Solanales	Potato	Solanum tuberosum	5	StHAK5	III	PGSC0003DMT400027038	MASGMGLDEDSGETKGGMWDLDQKLDQPMDEEAGRLRNMYREKTFSSLLLLRLAFQSLGVVYGDLGTSPLYVFYNTFPHGIDDPEDVIGALSLIIYSLTLIPLLKYVFIVCRANDNGQGGTFALYSLLCRHAKIKTIPNQHRTDEELTTYSRSTFHEHSFAAKTKRWLEAYPFRKNSLLILVVIGTCTVIGDGILTPAISVLSASGGIKVDHPKMSNDVVVIVAVIILVGLFSVQHYGTDRVGWLFAPVVLLWFLLVGGIGIFNIWKYDSSVVRAFSPVYIYRYFRRRKKDSWTSLGGIMLSITGTEALFADLAHFPVSAIQLAFTVIVFPCLLLTYMGQAAYLMQNKEHVVDAFYRSIPDSIYWPVFIVATLAAIVASQATITATFSIIKQALAHGCF…
2	27	Dicotyledons	Solanales	Potato	Solanum tuberosum	6	StHAK6	V	PGSC0003DMT400032781	MTDEGFERENGGLTSMESIESRWVFQGEDDLDIDSGDRDTVDGDDDSTTCNGMELESDDEDNVEQKLIRTGPRIDSFDVEALEVPGVQKNDFEDVSVGRAILLAFQTLGVVFGDVGTSPLYTFSVMFSKAPVNGNEDVLGALSLVLYTLILVPLVKYVLIVVWANDDGEGGTFALYSLLCRHAKVNLLPNQLRSDARISSFRLKVPSPELERSLKIKERLEASLTLKKLLLMLVLVGTSMVIADGVVTPAMSVMSAVGGLKVGLSGVKQDQVVMISVACLVVLFSVQKYGTSKVGLVVGPALFIWFCSLGGIGVYNLIKYDSHVWRAFNPVHIYYYFKRNSTKAWYSLGGCLLCATGSEAMFADLCYFSVRSVQLTFMFLVLPCLLLGYLGQAAYLMEN…
2	28	Dicotyledons	Solanales	Potato	Solanum tuberosum	7	StHAK7	II:c	PGSC0003DMT400062466	MDIDYGKCWDTSKKSWKSTLILAYQSLGVVYGDLSISPLYVYKSTFAEDIHHSETNEEIFGVLSFVFWTLTLVPLFKYVFIVLRADDNGEGGTFALYSLICRHAKVSLLPNRQVADEALSTYKLEHPPEMKNSSKLKLLLEKHKSLHTALLILVLLGTCMVIGDGLLTPAISVFSAVSGLELSMSREHHQYAVIPITCFILVCLFALQHYGTHRVGFVFAPIVMTWLLCISALGLYNIIHWNPQVYKALSPYYMVKFLKKTRKGGWMSLGGILLCITGSEAMFADLGHFSYTAIQIAFTFLVYPALILAYMGQAAFLSKHHHTIHKIGFYVSVPDVVRWPVLVIAILASVVGSQAIISGTFSIINQSQSLGCFPRVKVVHTNAKMHGQIYIPEINWILM…
2	29	Dicotyledons	Solanales	Potato	Solanum tuberosum	8	StHAK8	II:a	PGSC0003DMT400075514	MYQVGIHHEGDSLEHPPSLADGGANESIDTVGKDGKGGQTPQGKRKTEVPSKFPFLNISRNLVLAYQSLGVVYGDLSTSPLYVYRSVFDGKLQDYQSPETIFGAFSLIFWTITLIPLLKYVFIVLCADDNGEGGSFALYSLLCRHAKFSLLPNQQAADEELSSYKYGYSGRSTACLQLKRFLEKHKKSRTVLLVIVLLAACMVIGDGVLTPAMSVISSMSGIQAAADHLTHDGVVFLSCIILVGLFALQHSGTHRVGFLFAPIVLIWLISIMIIGLYNTIIWNPKIVSALSPYYIVKFFRETGKDGWISLGGILLSVAGTEAMYADLGHFSAFSMRITFAFVVYPCLVIQYMGQAAFLSKNLDSIPNSFYSSIPDGVYWPVFVIATLAAIVGSQSIITA…
2	30	Dicotyledons	Solanales	Potato	Solanum tuberosum	9	StHAK9	II:c	PGSC0003DMT400001329	MDIESWGRRNPIKKESWRTVIALAYQSLGVVYGDLSTSPLYVYKSTFAEDIQHSESNDEIFGVLSFVFWTLTLIPLLKYVFIVLRADDNGEGGTFALYSLLCRYTRVSTLPNGQLADEDLYEYKNDRNLSADRIGMSLKSTLEKHRFLKKILLILALIGTCMVIGDGVLTPAISVFSAVSGLELSMAKHHHQYVEVPVACVILVFLFFLQHYGTHRLGFLFAPIVITWLLCISAIGVYNIIHWNPHVYQALSPYYMYKFLKKTQRGGWMSLGGILLCITGSEAMFADLGHFSQLSIKIAFTFVVYPSLILAYMGQAAYLSKHHVIASDYHIGFYVSVPEKLRYPVLAIAILAAVVGSQAIITGTFSIIKQCSALGCFPRVKIVHTSSKIHGQIYIPEVN…
2	31	Dicotyledons	Solanales	Potato	Solanum tuberosum	10	StHAK10	II:a	PGSC0003DMT400052541	MEQPPSPAAEQTQLERRKGTLASKFMLVNISSNLLLAYQSLGVVYGDLSTSPLYVYRSIFVGKLQNYQTSEAIFGAFSLIFWTITLIPLLKYVFVVLSADDNGEGGTFALYSLLCRHAKFSLLPNQQAADEELSAYKYGSSGQSTSCLPLKRFLEKHKKSRTILLIVVLLGACMVIGDGVLTPAMSVISSMSGIQAATEHLSHGGVLILSCIVLVGLFALQHSGTHRVGFLFAPIVTIWLISIFLIGLYNTIFWNPKIVSALSPYYIVKFFKETGKDGWVSLGGVLLSIAGSEAMFADLGHFTATSMRIAFPFFVYPCLVVQYMGQAAFLSKNIDSIPNSFYNSIPDSVYWPVFVIATLSAIVGSQAVITATFSIVKQCNALGCFPRVKIVHTSKHIKG…
2	32	Dicotyledons	Solanales	Potato	Solanum tuberosum	11	StHAK11	II:a	PGSC0003DMT400064964	MFQGDIEHMQHNVEQPPPTSAGGGPQESVITVGQEEQPQLERKKRKLASKFPLVDISRNLLLAYQSLGVVYGDLSTSPLYVYKSIFVGKLQDYQTPETIFGAFSLIFWTITLIPLIKYVLIVLSADDNGEGGTFALYSLLCRHAKFSLLSNQQAADEELSAYKYGFAGQSTSCSVLKRFLEKHKKSRTVLLIIVLLGACMVIGDGILTPAMSVISAISGIKAAAEHLSHGEVLVLSCLILVGLFALQHSGTHRVGFLFAPIVIIWLISIFGIGLYNVIIWNPKIVHALSPYYIIKFFRETRKHGWFSLGGVLLSVAGTEAMFADLGHFTSCSMRIAFSFLVYPCLVVQYMGQAAFLSKNLASIPDSFYNSIPDSVYWPVFVIATLASIVASQSIITATF…
2	33	Dicotyledons	Solanales	Potato	Solanum tuberosum	12	StHAK12	II:c	PGSC0003DMT400010525	MDLETGVNQNRVKKESWKTILTLAYQSLGVVYGDLSTSPLYVYKSTFAEDITHSESNEEIYGVLSFVFWTLTLVPLLKYVFIVLKADDNGEGGTFALYSLLCRHAKVNSLPSCQLADEDLSSYKKDNIISPAPTTFGATLKSTLERHRVLQRFLLILALIGACMVIGDGILTPSLSVFSAVSGIELAIGKEHHKYVEVPLTCVILIALFALQHYGTHRVGFLFAPVVIIWLMCISAIGVYNIIKWDRHVYRALSPYYMYKFLKKTQRGGWMSLGGILLCITGSEAMFADLGHFSQLSIQIAFTFMVYPSLILAYMGQAAYLSQHHVIENESYRIGFYVSVPEILRLPVLVIAILAAVVGSQAIITGTFSIIKQCSSLGCFPRVKIVNTSSKIHGQIYIP…
2	34	Dicotyledons	Solanales	Potato	Solanum tuberosum	13	StHAK13	I:a	PGSC0003DMT400035725	MISGAFSIVAQAHSQGCFPRVKVVHTSEKHEGQVYIPELNYFLMIACVLVTLSFKTTEKLGHAYGIAVVSAEIITTHMVTLVMLVIWKISIWRIALFYSVYLTIESTYLSAQLTKFVDGGYLPLTFAIVFVIIMGIWHYVQKQRYHFELNNKVSSDYIRDLASNPDIKRIPGIGLLYSELVQGIPPIFPHFVSNIPSLHSIIVLVSIKSIPISKVALEERFLFRHVEPREYKVFRCVVRLGYNDQIRKPEEFENQLIQYLKEFIQQENYILAAHNDQVADKEIETETPVSGQQQVESSSTVVHVEEELQQQVESRVSSPTGSIRSINTPSGQSNHSSTRIQIVPPSLVDTEEEMQFVEKAKEQGVFYLLGEAEVVTKQDSSFLKKFAVNYAYTFLRKNF…
2	35	Dicotyledons	Solanales	Potato	Solanum tuberosum	14	StHAK14	II:c	PGSC0003DMT400035889	MFADLGHFSQLSIKIAFTSLVYPSLVLAYMGQAAYLSRHHVMENDYQIGFYVSVPDKLRWPVLVIAVLAAVVASQAAITGTFSIIKQCCALGCFPRVKIVHTSSKIHGQVYIPEINWTLMILCLAVTIGFRDTKRLGNAAGLAVITVMLVTTCLMSLVIVLCWHQNVLLAVCFVIFFGTIEALYFSASLIRFFEGAWVPIAISLVFMIVMCIWHYGSLKKYEFDVQNKVSIDWLLSVGPSLGIVRVRGIGLIYTELVSGIPAIFPHFVTNFPAFHQVLVFICVKSVPIPHVRHEERFLVGHIGPREHHLYRCIVRYGYRDARKDDLQFENDLVCSIAEFIRTGKRGLNGNAAEDLTKDLEDMTVLGTPNTHISGVQLYEDNELNSESVGTSKLREMHTT…
2	36	Dicotyledons	Solanales	Potato	Solanum tuberosum	15	StHAK15	I:b	PGSC0003DMT400029610	MCCVTYPALILAYLGQAAFLRKNIDDVSDTFYKSIPNGLYWPVFAVAVLAAIIASQALISGTFAIIQQSLALGCFPHVKIVHTSTKYHGQIYIPEVNNLLMLACVIVTLAFRTTEKLSNAYGIAVVFVMTLTSGFLVLVMIMIWKIHILFVIMYVLIIGSIELIYLSSVLYKFTQGGYLPLAFAMFLMFIMYVWNYVYRKKYHFELEHKISPLKVKETVDETNSHRLPGLAIFYSELVHGIPPIFKHYVENVPALHSVLVFVSVKSLPISKVPVEERFLFRRVKPSDLYVFRCAVRYGYNDVRNEEEPFERLLVERLKEFIRDDSILSMNAAKSNRVSTEQSINVELESDCEIQEVATCSMERDIQVVERAYSVGVVHLVGEQDVIASKGSNIVKRVVI…
3	37	Dicotyledons	Lamiales	Monkey flower	Mimulus guttatus	1	MgHAK1	II:a	Migut.N03017.1	MNTIGTDQNEENKGSLPPGAADTCQESTRSTGQDVEDEQSRQARSKMKLPSASLLANVPSSLLLAYQSFGVVFGDLSTSPLYVYSNTFVGKLHHHQNPEAVFGVFSLIFWTLTLIPFLKYVAIILSADDNGEGGTFALYSLLCRHGKFNLLPNQQAADEELSSYKYGPSGRSSVSLALRRFLEKHKSSRTSLLLVVLLGAGMVIGDGVINPAMSVLSSVSMLASAKARLPEGGVLLLACIILVGLFALQHCGTRKVGLLFAPVVILWLLTIFAVGLYNIIYWNPKIVFALSPHYIVKFFGQTGRDGWISLGGVLLCITGTEAMFANLGHFTACSVRLAFVSVVYPCLVVQYMGQAAYLSKNISSLPYGFYDSIPDAVLWPVFIIAILAATVSSQSVISA…
3	38	Dicotyledons	Lamiales	Monkey flower	Mimulus guttatus	2	MgHAK2	II:c	Migut.F01257	MVYCFSEKESAPTMDLGCGNCWRDSKRKDSWKTTMLLAYQSLGVVYGDLSISPLYVYKSTFAEDIHHSETNEEIFGVLSFVFWTLTLVPLFKYVFVVLRADDNGEGGTFALYSLICRHAKVSLLPNRQVADEALSTYKMEQPPHTKNSSRLKSVLENHKSLHTALLILVLLGTCMVIGDGLLTPAISVFSAVSGLELSMSKEHHQYAMVPITCFILVCLFALQHYGTHRVGFFFAPIVLVWLLCISALGLYNIFYWNPHVYQALSPTYMIKFLKKTGKGGWMSLGGILLCITGSEAMFADLGHFSYAAIQIAFTFLVYPALTLAYMGQAAYLSKHHHTIHSIGFYVSVPESVRWPVLTVAILASVVGSQAIISGTFSIINQSQSLGCFPRVKVVHTSEK…
3	39	Dicotyledons	Lamiales	Monkey flower	Mimulus guttatus	3	MgHAK3	I:b	Migut.N01405.1	MSSSDAATSTTHVLEEEVVTINQDENTPKTLAANKLLRRYDSLDIESAKLARRYHHAAAASTENGGWVVLLQLAFQSIGVVYGDLGTSPLYVFPGVFSNGIKDEDDILGVLSLILYTLTLLPLLKYVFIVLRANDNGDGGTFALYSLICRYAKVGLIPSEEMEDQNVSTFQLELPDNRTQRASKLKSKLENSNFTKYFLLFATMLGTSMLIGDGVLTPCISVLSSMSGLKLATQAMTEDRIVWASVGILIFLFTIQRFGTDKVGYTFAPILSVWFFLISGIGLYNIIKHDPLVIKAINPKYIVDYFRRNQKEAWISLGGVVLSTTGTEALFADVGHFSVRAIQISTCSVVYPSIMLAYTGQASYLRKHISDVDNAFYASVPGRMYWPMFVVAVMASIIA…
3	40	Dicotyledons	Lamiales	Monkey flower	Mimulus guttatus	4	MgHAK4	III	Migut.M01990.1	MASGMESDEGGETKGSMWVLEQKLDQPMDEEAGRLKNMYREKKFSAILLLRLAFQSLGVVYGDLGTSPLYVFYNTFPHGIDDPEDVIGALSLIIYSLTLIPLLKYVFIVCRANDNGQGGTFALYSLLCRHAKVKTIPNQHRTDEELTTYSRTTFHEHSFAAKTKKWLEADAFRRNSLLMLVLIGTCMVIGDGILTPAISVLSASGGIKVDHPKMSNDVVVLMAVFILVGLFSMQHYGTDKVGWLFAPIVLIWFIMIGGIGIFNIYKYDSSVLKAFSPLYIYRYLKRGKKKGWTSLGGIMLSITGTEALFADLAHFPVSAIQLAFTVVVFPCLLLAYSGQAAYLMENRDHVQDAFYRSIPDKVYWPVFIIATLAAIVASQATISATFSIIKQALALGCFP…
3	41	Dicotyledons	Lamiales	Monkey flower	Mimulus guttatus	5	MgHAK5	II:a	Migut.G00911.1	MNQIDIEPEEDYNDLAKREGQESTHTQDENPRAATNKRKLTPKFLLASFPPSLILAYQSFGVVYGDLSTSPLYVYRSIFIGKLQDHQNSETILGAFSLIFWTLTLIPLLKYVIIMLSADDSGEGGTFALYSLLCRHGKFSLLPNQQAADEELSSYKYGSSGQSSSSAAMKRFIEKHKKFRTGLLLVVLMGAGMVIGDGVITPAMSVLSSVSGLDAAQKRIPNGAVQFISCVILVGLFALQHCGTHKVGFLFAPVVLIWLVSIFAIGIYNVIKWNPKAVFALSPHYIIKFFKQTGKDGWISLGGVLLSITGTEAMFADLGHFSASSIRIAFVFLVYPCLVMQYMGQAAYLSKNISSIPNSFYDSIPGSVFWPMFVIATLAAIVASQAIISATFSIVKQCS…
3	42	Dicotyledons	Lamiales	Monkey flower	Mimulus guttatus	6	MgHAK6	II:c	Migut.H00138.1	MVLRRPVMDIEAWSPERSIKKESWKTVLTLAYQSLGVVYGDLSTSPLYVYKSTFAEDIQHSETNEEIYGVLSFVFWTLTLIPLLKYVFIVLRAGDNGEGGTFALYTLLCRHARIGTLPNGQLADEDLYEYKKDGISSCNNKGLGMKLRSTLEKHKLLQKMLLILALIGTCMVIGDGVLTPAISVFSAVSGLELVVSKHHHQYIEVPVACIILVFLFYLQHYGTHRLGFLFAPIVITWLFCISSIGVYNIFHWNPHVYKALSPYYMYKFLKKTRRDGWMSLGGILLCITGSEAMFADLGHFSQLSIKIAFSFVVYPSLILAYMGQAAYLSKHHVIESDYQIGFYVSVPEKIRWPVLAIAILAAVVGSQAIITGTFSIIKQCCALGCFPRVNIIHTSSKIC…
3	43	Dicotyledons	Lamiales	Monkey flower	Mimulus guttatus	7	MgHAK7	V	Migut.L01397.1	MERDGIEESSVRLLGSSASGGGGGGGAAGESSRWVDGSEVDSESPPWSLVGDDNESRQGYGATVRRRLIKKPKRLDSFDVEAMEIAGSHGHHHKDDSVWRTMALAFQTLGVVYGDMGTSPLYVFSDVFSKVPITSEIDVLGTLSLVIYTIALIPLIKYVFVVLKANDNGEGGTFALYSLICRYAKVNLLPNSQPADECISSYKLKLPTPELERALSIKDKLERNSYLKKFLLLLVLMGTSMIIGDGILTPAISVMSAVSGLQGRVPGFGTALGCIGIYNLFKYDVTVVKALNPAYIYLFFKKNGTKGWSALGGCVLCITGAEAMFADLGHFSVPSIQIAFTTVVFPCLLLAYMGQAAYLIKQPQTADRIFYESVPEGLFWPVFATATIAAIIASQAMIS…
3	44	Dicotyledons	Lamiales	Monkey flower	Mimulus guttatus	8	MgHAK8	II:c	Migut.E00154.1	MDLESGVFQNQVKKESWKTVLTLAYQSLGVVYGDLSTSPLYVYKSTFSEDIEHTNTNEEIYGVMSLIFWTLTLVPLLKYVFIVLRADDNGEGGTFALYSLLCRHAKVNPLPSRQLADEDLSSYTKDIKSPAQSTFGGRLKSTIERYRVLQRFLLVLALLGACMVIGDGILSPAISVFSAVSGVEVAMKKEHHQYVELPVVCIILIALFTLQHYGTHRVGFLFAPIVITWLLCIASIGLYNIIHWNPHVYRALSPYYIYIFLKKTQKQGWMSLGGILLCITGSEAMFADLGHFSQLSIQIAFTSFVYPSLVLAYMGQAAYLSQHHEMQNDYHIGFYVSVPETLRWPVLVIAVLAAVVGSQAIITGTFSIIKQCSALGCFPRVKIVHTSSKIHGQIYIPEV…
3	45	Dicotyledons	Lamiales	Monkey flower	Mimulus guttatus	9	MgHAK9	V	Migut.B00611.1	MTEEGSEREKRGLSSMDSMESRWVYQDEEGSEIDNDGDGRGSGGEESPLRDSDDEDNAEQRLIRTGPRIDSFDVEALEVPGAQRNDFEDATLGRRILLVFQTLGVVFGDVGTSPLYTFSVMFSKAPVKGNEDVLGALSLVLYTLILISLIKYVLIVLWANDDGEGGTFALYSLICRHAKVSLLPNQLPSDARISSFRLKVPSAELERSLKIKERLETSLTLKKLLLMLVLAGTSMVIADGVVTPAMSVISAVGGLKIGVSGFSEDHVVMISIAFIIILFSLQRYGTSKVGLVVGPALFIWFCSLGGIGIYNLVKYDTRVLQAFNPIHIYYYFKRNSTKAWYSLGGCLLCATGSEAMFADLCYFSVRSVQLTFMFLVLPCLLLGYLGQAAYLMENHVDTT…
3	46	Dicotyledons	Lamiales	Monkey flower	Mimulus guttatus	10	MgHAK10	I:b	Migut.D00752.1	MSTDAATEDGSTAAAALSLDKRPRRYDSFDIESNRSHKRGGAAADGGGGWGVLVQLAFQSIGVVYGDLGTSPLYVFAGIFSDGIKHEDDILGVLSLILYTLTLIPVVKYVFIVLRANDNGDGGTFALYSLICRYAKVGLIPSEEEEDQNVSNFQLELPNNRNQRASKLKSKLENSVFAKYMLLFATMLGTSMLIGDGVLTPCISVLSSMGGLKLAAKAMTQDTIVWTSVGILIFLFMIQRFGTDKVGYTFAPVLTLWFLLISGIGLYNIIKHDPLVIKAINPKYIVEYFMRNKVDAWISLGGVVLSITGTEALFADVGHFSVRAIQISTCGLVYPSIILAYIGQAAYLRKNMSDVGMAFYASIPGPMYWPMFVVAVLASIIASQSLISATFSIVQQSLS…
3	47	Dicotyledons	Lamiales	Monkey flower	Mimulus guttatus	11	MgHAK11	I:b	Migut.D00753.1	MSGDDQSGNNSNTQAVVSGQEVSSSTNNKALRRYDSSEDIEFGRRYSHGGAAAADGGGWGVLAQLAFQSIGVVYGDLGTSPLYMFPGIFSNGIKHKDDILGVLYLLYRNWRGTFALYSLVCRHAKVGLLPSEEVEDQNISTFDNSAQRASKLKSKLEKSAFTKYLLFATMLGTSMLIGDGVLTPYRIVWTSVGILIFLFMIQRFGTDKVGYTFAPVLTVWFFFISAIGIYNIMHHDPLVIKAVNPKYIVEYFVRNKSDAWISLGGVVLCITGTEALFADVGHFSVKAIQISTFGLVYPSIIIAYIGQASYLRKNTSHVDMAFYASIPGPMYWPMFVIAVLASIIASQSLISATFSIIQQSLSLGCFPRVKVVNTSAKYPGQVYIPEINYLLMLACVFVT…
3	48	Dicotyledons	Lamiales	Monkey flower	Mimulus guttatus	12	MgHAK12	IV	Migut.F00248.1	MSFTRTYQPHQHRETKEYPAMQTILLAYQSLGVVYGDLGTSPVNVFSSTRLTNLSEEDLLGTLSLIIWTLTSLVLIKYVFIVLHANDHGEGGTFALYSYICRHINFKSKFTIQNTKLESDSNMEFYSGGGGSPFSTRTKKFLERSTTAQNFLTMLVFLGTCMVIGDGALTPATCVLSALQGIQSRSSKITQDHVVWLSVVLLVALFVFQRCGTSKVSFSFSPIMLMWFATNVSISVYNIITYEPYILKAVSPHYIVKFFMRNGKTAFDLLGAVFLAITGAEAMFADLGHFNKRAIQWGFSFVVYPSLILTYAGETAYLTKNPEKITNAYYSSIPENVYWPMFVISTLAAVVSSQSMISATFSIVKQSLSLGCFPRVNIIHTSSKHQGQVYSPEINYILM…
3	49	Dicotyledons	Lamiales	Monkey flower	Mimulus guttatus	13	MgHAK13	II:c	Migut.L01396.1	MEIESGVNHNQIKKDSWKTVFTLAYQSLGVVYGDLSTSPLYVFKNTFAEDIEHSETNEEIFGVLSFIFWTLTLIPLLKYVFIVLRADDNGEGGTFALYSLLCRHAKVNSLPSFQSADEDLSSYKKDIRSPAPSTFGARLKSSLEKYRVLQRFLLVLALLGACMVIGDGILTPAISVFSAVSGVELATAKEHHKYIEVPVACMVLIGLFALQHYGTHRVGFLFAPVVITWLFCISAIGIYNIFHWNPHVYQALSPYYMYKFLKKTQRGGWMSLGGILLCITGSEAMFADLGHFSQLSIQIAFTSIVYPSLILAYMGQAAYLSQHHVIEDDYRIGFYVSVPEKLRWPVLVIAIMAAVVGSQAIITGTFSIINQCSALGCFPRVKIVHTSSKIHGQIYIPEI…
4	50	Dicotyledons	Vitales	Grapevine	Vitis vinifera	1	VvHAK1-a	I:b	NP_001267902.1	MSSDVVNSPDDTHDQGLKSKKLSWGKLRRMDSLDMESGTVHGRSHHGSKDTKDWSVILHLAFQSLGIVYGDIGTSPLYVYASTFTDGVKHNDDILGVLSIIFYTLTLIPLFKYVLTVLKATDNGDGGTFALYSLICRYAKVGLIPSQQAEDREVSNFRLELPSKRLQMASKLKSKLEKSNSAKFFLLFATMLGTSMVIGDGVLTPCISVLSAVGGIKEVTDSMTQDRIVWMSVGILVCLFMVQRFGTDKVGYSFAPIICVWFALISGIGVYNFIKFDPTVVKAINPKYIIDYFRRNKKQAWISLGGAVLSITGTEALFADVGHFTVRSIQISMCAVTYPALVLAYTGQASFLRKHHQDVADLFFKSIPHGLYWPMFVVAVSAAIIASQAMISGTFSIIQ…
4	51	Dicotyledons	Vitales	Grapevine	Vitis vinifera	2	VvHAK1-b	I:b	XP_002264655.1	MSSDVVNSPDGTHDQGLTSKKLSWGKLRRMDSLDMESGTVHGHSHHGSRGTKNWSVILHLAFQSIGIVYGDIGTSPLYVYASTFTDGVKHNDDILGVLSLIFYTLTLIPLFKYVLIVLKANDNGDGGTFALYSLICRYAKVGLIPSQQAEDREVSNFRLELPSKSLQRASKLKSKLEKSNFAKFFLLFATMLGTSMVIGDGVLTPCISVLSAVDGIKAATDSMTEDRIVWISVAILVCLFMVQRFGTDKVGYSFAPIICVWFALIGGIGVYNFIKFDPTVVKAINPKYIIDYFTRNKKQAWISLGGIVLAITGTEALFADVGHFTVQSIQLSMCTVTYPALVLAYTGQASFLRKHHEDVGDLFFKSIPHRLYWPMFVVAVSASIIASQAMISGTFSIIQ…
4	52	Dicotyledons	Vitales	Grapevine	Vitis vinifera	3	VvHAK1-c	I:b	XP_002264737.1	MSSDVVNSPDDTHDQGLKSKKLSRGKLRRMDSLDMESGTVHGHSHHGSKDTKDWSVILHLAFQSMGIVYGDIGTSPLYVYASTFTDGVKHNDDILGVLSIIFYTLTLIPLFKYVLTVLKATDNGEGGTFALYSLICRYAKVGLIPSQQAEDREVSNFRLELPSKRLQMASKLKSKLEKSNFAKFFLLFATMLGTSMVIGDGVLTPCISVLSAVGGIKEVTDSMTQDRIVWISVAILVCLFMVQRFGTDKVGYSFAPIICVWFALISGIGVYNFIKFDPTVVKAINPKYIINYFRRNKKEAWISLGGAVLSITGTEALFADVGHFTVRSIQISMCAVTYPALVLAYTGQASFLRKHHQDVADLFFKSIPHGLYWPMFVVAVSASIIASQAMISGTFSIIQ…
4	53	Dicotyledons	Vitales	Grapevine	Vitis vinifera	4	VvHAK1-d	I:b	XP_002265365.1	MSSDVVNSPDETHDQGLKSKKLSCGELRRMDSLDMETGTVHGQSHHSSRGSKNWSVILHLAFQSIGIVYGDIGTSPLYVYASTFTDGVKHNDDILGVLSLIFYTLTLIPLFKYVLIVLKANDNGGGGTFALYSLICRYAKVGLIPSQQAEDREVSNFRLELPSKRLQMASKLKSKLEKSNFAKLFLLFATMLGTSMVIGDGVLTPCISVLSAVGGIKVALDSMTQDMIVWISVVILVCLFMVQRFGTDKVGYSFAPIICVWFALISGIGVYNFIKFDPTVVKAINPKYIIDYFRRNKKQAWISLGGVVLSITGTEALFADVGHFTVQSIQISMCTITYPALVLAYTGQASFLRKHHEDVGDIFFKSIPHGLYWPMFVVAVSASIIASQAMISGTFSIIQ…
4	54	Dicotyledons	Vitales	Grapevine	Vitis vinifera	5	VvHAK2	II:c	NP_001267903.1	MDPDHGRCWGTSKKDSWKTLLLLSYQSLGVVYGDLGISPLYVYKSTFAEDIHHSETNEEIFGVLSFVFWTLTLVPLFKYVFIVLRADDNGEGGTFALYSLICRHAKVSLLPNRQVADEALSTYKLEHPPEQKNSSRVKMLLEKHRVLHTALLTLVLLGTCMVIGDGLLTPAISVFSAVSGLELSMSKEHHQYAVIPITCFILVCLFALQHYGTHRVGFFFAPVVLIWLLCISALGLYNIFRWNPHVYQALSPYYMFKFLKKTRKDGWMSLGGILLCITGSEAMFADLGHFSYTXIQIAFTFLVYPALILAYMGQAAYLSIHHDNSYQISFYVSVPEAVRGPVLIIAILASVVGSQAIISGTFSIINQSQSLGCFPRVKVVHTSDKIHGQIYIPEINWIL…
4	55	Dicotyledons	Vitales	Grapevine	Vitis vinifera	6	VvHAK3	II:a	XP_002277453.2	MEPESGTSSRNPSQLSWVNLSRNLVLAYQSFGVVYGDLSTSPLYVYKSTFIGKLQNHQNEEAIFGAFSLIFWTLTLVPLLKYVFILLSADDNGEGGTFALYSLLCRHARFSLLPNQQAADEELSAYKYGPLTQAVGSSPLKRFLEKHKRLRTALLLVVLFGACMVIGDGVLTPAISVLSSVSGLQVTENKLTDGVVLLLACVILVGLFALQHFGTHRVAFIFAPVVIIWLLSIFCIGLYNTIRWNPKIVRAFSPLFIIKFFRETGKEGWISLGGILLSITGTEAMFADLGHFTAFSIRLAFAFVIYPCLVVQYMGQAAFLSKNIPSISSSFYDSIPDTVFWPVFIIATLAAIVGSQAVITATFSIIKQCHALGCFPRVKVVHTSRHIYGQIYIPEINWI…
4	56	Dicotyledons	Vitales	Grapevine	Vitis vinifera	7	VvHAK4	II:a	XP_002272302.1	MLEHVLQRRQDLPIHTQPPNNKGQKMAQIRNQHKRVLLLAYQSLGIVFGSLSTSPLYVYKITFSGWLQHYQTEDAVFGACSLIFWTFMLLPLFKYVVIMLSVDDNGEGGTFALYSLLCRHAKLCLLPNHQAADEDLSTYFSPRYSNRNIPPSVFKRYVEKHKNTRTGLLLVVLFGASMVIAIGVITPSITVLSSIEGLKVRVKNADDRMVVAITCFVLVCLIVRQHHGTHRVGITFAPIVLLWLLSVALLGIYNITKWNPRIYQALSPYYIYKFFRNTGKDGWISLGGIFLCITGTEAMFADLGQFTATSMRVAFFVVIYPCLMLQYTGQAAFLSKNFSAVDISFYASVPEPLFWPVFVLAISTGIVASQAAISETFSIVQQCQALGCFPRVKIVHTSR…
4	57	Dicotyledons	Vitales	Grapevine	Vitis vinifera	8	VvHAK5	I:a	XP_003631225.1	MDEEEMERREAATDEGTDTAIEADENKLKERKVSWAKLRRVDSLNLEAGRVSTAGGHTSKVDWRRTLNLAFQSIGVVYGDIGTSPLYVFSSTFTDHKIENTDDILGVLSLVIYTIVLVPLLKYVLIVLRANDNGDGGTFALYSLICRYARVSLIPNDQPEDRQLSNYKLDTPSNQLRRAQKIKEKLENSRTSKVVLFIVTILGTSMVIGDGVLTPCISVLSAVSGISSLGKDAIVGISVAILILLFSAQRFGTDKVGIAFAPVILLWFTFISGIGLYNLFKYNVGVLRAFNPKYAVDYFKRNGKKGWISLGGVVLCITGTEAMFADLGHFNIRAIQISFSGIVFPALLAAYSGQAAYLTKFPGEVEHTFYSSIPDPLYWPTFVVAVAAAIIASQAMISG…
4	58	Dicotyledons	Vitales	Grapevine	Vitis vinifera	9	VvHAK6	II:c	XP_002264992.2	MGFDGNPQSLSQSLSEGLQKMSSKNEPITKESWRAVLTLAYQSLGVVYGDLSTSPLYVYKSTFAEDIQHSETNEEIYGVLSFVFWTLTLVPLLKYVFIVLKADDNGEGGTFALYSLLCRHARVNSLPNCQSADEELSEYKKDGAGSTETPNFGSRLKSALEKHRVLQRFLLVLALIGTCMVIGDGVLTPAISVFSAVSGLELSMEKEHHKYVEVPAACIILIGLFALQHYGTHRVGFLFAPVVVTWLFCISAIGLYNIFHWNPHVYRALSPYYMYTFLKKTQRGGWMSLGGILLCITGSEAMFADLGHFSQLSIKIAFTSVVYPSLILAYMGQAAYLSQHHLIESDYRIGFYVSVPEKLRWPVLVIAILAAVVGSQAIITGTFSIIKQCSALGCFPRVK…
4	59	Dicotyledons	Vitales	Grapevine	Vitis vinifera	10	VvHAK7	V	XP_002274579.1	MAEEGSERENGGLVAMDSMESRWVFQDEDETEMDDDDEDLGLRTVLDSEDDENGEPKLIRTGPRIDSFDVEALEIPGAQRNDYEDFSLGRRIILAFQTLGVVFGDVGTSPLYTFGVMFSKAPIKGDEDIIGGLSLILYTLILIPLIKYVLVVLWANDDGEGGTFALYSLICRHAKVSLLPNQLPSDARISSFRLKVPSPELERSLKIKERLETSLTLKKLLLMLVLAGTAMVIADGVVTPAMSVMSAVGGLKVGISGIKQDEVVMIAVAFLIILFSVQKFGTSKVGLAVGPALFIWFCSLAGIGIYNLVKYDSRVLMAFNPVHIYYFFKRNSTKAWYALGGCLLCATGSEAMFADLCYFPVRSVQLTFVFLVLPCLLLGYLGQAAYLMENHDQYGQLFF…
4	60	Dicotyledons	Vitales	Grapevine	Vitis vinifera	11	VvHAK8	II:c	XP_002274956.2	MDLERRESWRTVLTLAYQSLGVVYGDLSTSPLYVYKSTFAEDIHHSETNEEIYGVLSFVFWTLTLIPLLKYVFIVLRADDNGEGGTFALYSLLCRHARVNSIPNCQLADEELSEYTRDGFVLLDKNSGSSLKSTLEKYRVLQRVLLVLALIGTCMVIGDGVLTPSISVFSAVSGLELSMSKEHHLYVQVPVACIILVFLFALQHYGTHRVGFLFAPIVITWLLCISAIGLYNIFHWNPCVYQALSPYYMYKFLKKTQRGGWMSLGGILLCITGSEAMFADLGHFSQLSIQIAFTFVVYPSLILAYMGQAAYLSKHHTIESDYHIGFYVSVPEKLRWPVLGIAILAAVVGSQAIITGTFSIIKQCSALGCFPRVKIVHTSSKIHGQIYIPEINWTLMLLC…
4	61	Dicotyledons	Vitales	Grapevine	Vitis vinifera	12	VvHAK10	III	XP_002276261.2	MASGIEFEEDSENKGSMWVLDQKLDQPMDEEAGRLRNMYREKKFSAVLLLRLAFQSLGVVYGDLGTSPLYVFYNTFPRGIEDPEDVVGALSLIIYSLTLIPLLKYIFVVCRANDNGQGGTFALYSLLCRHAKINTIPNQHRTDEELTTYSRTTFHEHSYAAKTKRWLEGHASRKNMLLILVLVGTCMLIGDGILTPAISVLSAAGGIKVDHPGMSNEIVVLVAVVILVGLFSMQHYGTDRVGWLFAPIVLLWFLVIGGIGIFNIWKYDSSVLKAFSPVYIYRYFKRGGRDGWTSLGGIMLSITGTEALFADLAHFPVSAVQLAFTVVVFPCLLLAYSGQAAYLVKNQDHVVDAFYRSIPDSIYWPVFVVATAAAIVASQATISATFSIIKQALALGCFP…
4	62	Dicotyledons	Vitales	Grapevine	Vitis vinifera	13	VvHAK12	V	XP_002264951.2	MDGERIEETNSRLMGSSGGESRWVDGSEMDSDSPPWSLFGDDEGREGYGSIRRRLVKKPKRADSFDVEAMEIAGSHAHDSKDLSVWPTLALAFQTLGVVYGDMGTSPLYVFSDVFSKVPIESEVDVLGALSLVMYTIALLPFAKYVFIVLKANDNGEGGTFALYSLICRYAKVNMLPNRQVADEQISSFRLKLPTPELERALNIKDSLERRSSLRTLLLLLVLMGTSMIIGDGILTPAMSVMSAVSGLQGEIRGFGTNAVVLVSVIILVGLFSIQQFGTSKVGFTFAPALALWFFCLGSIGIYNIYKYDITVLRAFNPAYVYLFFKKNSTQAWSALGGCVLCITGAEAMFADLGHFSVRAIQIAFTCVVFPCLLLAYMGQAAFLMKHPHSTGRIFYDCV…
4	63	Dicotyledons	Vitales	Grapevine	Vitis vinifera	14	VvHAK13	II:c	CBI15612.3	MNPQPSSGSSHDFKKETWRHTFLLAFQSLGIVYGRLSTAPLYVFMSIPREDIISEQRVYELFSFVFWTMTIIPLLKYAFIVLRADDNGEGGTFALYSLLCRHAKVGLHPNDRSANEVMKSISAPASKTKVESRARRAIEKHKSSHYLMLFLALFGSCMVIGDGVLTPAISVLSASSGFERSMSHIAHKIASSQRVGDDIEKAFKRYVPVPFACAILVGLFTLQHYGTHKIGFLFAPIIVIWLFFISGVGLYNIFYSDHQIIYAVSPVYMYRFMRNFDHQGWRSLGSILLSVAGSEAMFADLGHFSKKSLKITFVCLIYPALILCYAGQAAFISKNWRVFEDVTYLSESVPGAFLRHIVVLLSLLASAVGSQATITASFSVINQCLALGCFPRVKVIHTS…
4	64	Dicotyledons	Vitales	Grapevine	Vitis vinifera	15	VvHAK14	IV	XP_002281786.1	MNAYWKQGNNGGNNLLLAYRTLGVVFGGLVTSPLYVYPSLHLKSPTEDDYLGIYSIMFWTLTLIGVVKYASIALKADDQGEGGTFALYSLLCRNLNIGILPSKCMDSNSKVSHSSGHEGAKDHSRLGKFFEKSIIARRVLLFIAMLGTCMLIGDGILTPAISVLSAMDGIRAPFPSVSKSLVEAISAAVLILLFLMQKFGTSRVSFLFSPIMGAWTITTPLVGIYSIVQHYPSIFKALSPHYIFHFFWRRGKDGWLLLGGTVLCITGSEALFADLGHFSRPSIQIAFFLTIYPSLVLTYAGQTAYLIKNPNDHDDGFYKFIPTPIYWPIFIIATSAAIVASQSLISATFSIIKQSVVLDYFPRVKVVHTSPSKEGEVYSPEINYILMILCVLVILIFGD…
4	65	Dicotyledons	Vitales	Grapevine	Vitis vinifera	16	VvHAK15	II:b	XP_002276582.1	MSPTPSEESIEQEISQQNVKRVSCTTVLTLAYQSLGVVYGDLSTSPLYVYKTTFSGKSSLHGNDEEIYGVLSFIFWTFTLIALFKYIFIVMSAADNGEGGTFALYSLLCRHARLSILPNQQAIDQKLSAYAMERSADTRQSFVMKSVFEKHPKFRQGLLIFVLLGTCMAIGDGILTPAISVLSAVSGVQLKITELHENHVVLISCVILVVLFSLQHYGTHRVAFMFAPIVTAWLLCISGIGIYNILRWNPHIFCALSPTYMLKFLKSTGIEGWISLGGVVLSITGVEMMFADLGHFSALSIKIAFTVLVYPSLILAYMGEAAYLSRHHEDLQRSFYKAIPEAVFWPVFIVATFAAVVASQAAISATFSIISQCCALNCFPRVKIVHTSQKISGQIYIPE…
4	66	Dicotyledons	Vitales	Grapevine	Vitis vinifera	17	VvHAK16	II:b	XP_002265329.2	MKYGHIGPCSLEYLLWDDIGEDLAMKFIYIVCCYEMEIGICKKKKMDTEMGSVNQESRLKFYKTTLCLAYQSLGVVYGDLSISPIYVYQTTFSGGMKLYENNHEILGVLSLVIWTLTIIPLFKYVIFVLGADDNGEGGTFALYSLLCRHSKMGLLNASYAARENISSCDSQIPTEETRTSLLLKEFFQKHRSSRIVLLLVVLLGTSMVIGDGILTPTMSVLSAVIGIKVQVKELHENHAVIIACVILVGLFALQHFGTHKVGFLFAPILIAWLLCISGIGIYNIIHWNPHVIRAISPHYIYNFFRETGKVGWSSLGAIVLCITGAEAMFADLGHFSKLSVRIAFTAIVYPCLILAYMGEAAYLSQNRTDVEHSFHKAIPKLMFWPVFIIATLATVVGSQ…
4	67	Dicotyledons	Vitales	Grapevine	Vitis vinifera	18	VvHAK17	II:c	Vv00017887001	MQKETWRHTFLLAFQSLGIVYGRLSTAPLYVFMSIPREDIISEQRVYELFSFVFWTMTIIPLLKYAFIVLRADDNGEGGTFALYSLLCRHAKVGLHPNDRSANEVMKSISAPASKTKVESRARRAIEKHKSSHYLMLFLALFGSCMVIGDGVLTPAISVLSASSGFERSMSHIAHKNVPVPFACAILVGLFTLQHYGTHKIGFLFAPIIVIWLFFISGVGLYNIFYSDHQIIYAVSPVYMYRFMRNFDHQGWRSLGSILLSVAGSEAMFADLGHFSKKSLKITFVCLIYPALILCYAGQAAFISKNWRVFEDVTYLSESVPGAFLRHIVVLLSLLASAVGSQATITASFSVINQCLALGCFPRVKVIHTSDTMNGRVYIPDVNWLLMILSLGIVIAFQD…
5	68	Dicotyledons	Fabales		Medicago truncatula	1	MtHAK1-a	II:b	Medtr5g071630.1	MSPGHSCANVLTLAYQSLGVVYGDLSTSPLYVYKTSFSGKLSLKEDDEEIFGVLSFIFWIFTIIALFKYVFIVMSADDDGEGGTFALYSLLCRHARLSILPNQQPTDENLSAYSTEDSADTWQSSLLKLFFEKHPRFQKGLLIFVLLGTCMTIGDGVITPAISVFSAVLGVQVKINQLHDNYVVIVSCIILVGLFSIQHHGTHRVAFMFAPVVAAWLLCISGIGIYNIFRWNRQVYRALSPVYMFRFLKTTGIEGWLSLTTVLGVETMYADMGHFSALSIKIAFTCLVYPCLILAYMGEAAFLSKHHYDIERSFYKAIPEAVFWPVFIVATFDAVVGSQAVISATFSIISQCCALNCFRVKIVHTSSKIYGQIYVPEVNWILMCLCLAVTIGLWDPNMM…
5	69	Dicotyledons	Fabales		Medicago truncatula	2	MtHAK1-b	II:b	Medtr5g071827.1	MSADDNGEGGTFALYSLLCRHARLSILPNQQPTDETLSAYSTEDSADTWQSSLLKLFFEKHPRFQKGLLIFVLLGTCMTIGDGVITPAISVFSAVSGVQVKINQLHDNYVVIVSCIILVGLFSIQHHGTHRVAFMFAPVVAAWLLCISGIGIYNIFQWNRQVYRALSPVYMFRFLKTTGIEGWLSLSGVVLSITGVETMYADMGHFSALSIKIAFTCLVYPCLILAYMGEAAFLSKHHYDIERSFYKAIPEAVFWPVFIVATFAAVVGSQAVISATFSIISQCCALNCFPRVKIVHTSSKIYGQIYVPEVNWILMCLCLAVTIGLRDTNMMGHAYGLAITTVMFVTTCLMTLIIIIVWKQGIIKALTCFLLFGSIELLYISASVCKIPEGGWIPISLSF…
5	70	Dicotyledons	Fabales		Medicago truncatula	3	MtHAK1-c	II:b	Medtr5g071860.1	MNPSEQIVEQGISHQNLKRTSCLNVLTLAYQSLGVVYGDLSTSPLYVYKTSFSGKLSLKEDDEEIFGVLSFIFWTFTIIALFKYVFIVMSADDNGEGGTFALYSLLCRHARLSILPNQQPTDETLSAYSTEDSADTWQSSLLKLFFEKHPRFQKGLLIFVLLGTCMTIGDGVITPAISVFSAVSGVQVKINQLHDNYVVIVSCIILVGLFSIQHHGTHRVAFMFAPVVAAWLLCISGIGIYNIFQWNRQVYRALSPVYMFRFLKTTGIEGWLSLSGVVLSITGVETMYADMGHFSALSIKIAFTCLVYPCLILAYMGEAAFLSKHHYDIERSFYKAIPEAVFWPVFIVATFAAVVGSQAVISATFSIISQCCALNCFPRVKIVHTSSKIYGQIYVPEVN…
5	71	Dicotyledons	Fabales		Medicago truncatula	4	MtHAK2	II:c	Medtr3g094090.2	MDLEPGRKCWDTSKRGDWKTILLLAYQSLGVVYGDLSISPLYVFTSTFAEDIEHSETNEEIYGTLSFVFWTLTLIPLFKYVFVVLRADDNGEGGTFALYSLICRHAKVSLLPNRQHADEALSSYKMEEPPEKEYSKFKMLLEKYKTLHTALLIVVLLGTCMVIGDGVLTPAISVFSAVSGLEVSIMSKKHHQYAVIPITCFILVCLFALQHYGTHKVGFFFAPIVLTWLLCISTLGVYNIFKWNPHVYKALSPYYMFKFLKKTRISGWLSLGGILLCITGSEAMFADLGHFNYMAIQIAFTFLVYPALILAYMGQAAYLSQHHNADLRISYYVSVPESVRWPVLILAILASVVGSQAIISGTFSIINQSQSLGCFPRVKVVHTSEKIHGQVYIPEINWM…
5	72	Dicotyledons	Fabales		Medicago truncatula	5	MtHAK3	II:a	Medtr6g033165.1	MESPLELGLPAVGNFQHTHTVVTSRVVGSRSDGPYFKLGNLNSRGDSVTEFSHRQSRNLLLAYQSFGVVYGDLSTSPLYVYKSTFEGKLQNHHDEETIFGVFSLIFWTLTLIPLLKYVFILLSADDNGEGGTFALYSLLCRHAKFNLLPNQQAADEELSSYKYGPSSQTGASSPLKTFLEKHKRSRTVLLVVVLFGACMVIGDGVLSPAISVLASVSGLKVTETKFNDGELVLLACLILVGLFALQHCGTHRVAFMFAPIVIIWLLSIFILGIYNTIYWNPKIVFAISPHYIIKFFIKTSTQGWISLGGILLCITGAEAMFADLGHFTASSIRLAFAFVIYPCLVMQYMGQAAFLSKNLESVHNSFYDSIPGPVFWPVFVIATMAAIVGSQATITATFS…
5	73	Dicotyledons	Fabales		Medicago truncatula	6	MtHAK4	II:a	Medtr8g099090.1	MSSSDGNRQRGSSSTTVERKSQCKTLFFLTYQSLGFLFGDISLSPLYVYQSIFSGRLKHVQNEDAIFGSFSLIFWTLSLISLLKYAVFMLSADDNGEGGTVALYSHLCRNAKFCLLPNHQASDEELSTYRKPGYSNRNIPPSSLKRFIEKHKNTKIVLLIFVLLGACMIICVGALMPAISVLSSVEGLKIEAKIKNNSMVPLISCVLLVGLFVLQHRGSHTVAFMFPPIIILWLLSIFMIGIYNVIKWNPRIYQAFSPYYIYKFFCVTGKDGWINLGGVFLCVTGTEAMFTDLGYYKQVPVRVAFSCVVYPCLILQYMGQAAFLSKNLSAVPISFYASIPDVLFWPVFVGASLAAIVASQAVISSTFSIVQQCHAFECFPRIKAVHSRRWLNGQIFIPE…
5	74	Dicotyledons	Fabales		Medicago truncatula	7	MtHAK5-a	I:a	Medtr8g088200.1	MNSWPNDLHVDSLRLEAGRVPSANNIHASKTSWLGTLSLAFQSLGIIYGDIGTSPLYVYDSTFPDGISNKQDLLGCLSLIIYTISLIVFVKYILVVLWANDNGNGGTCALYSLICRHSKVSLIPNHQPEDIEISHYKLETRSRQKIKHKLENSKFAKLFLFIVTIMATAMVIGDGILTPSISVLSAVSGIRTRSSSLGQGAVLGISIGILIILFGAQRFGTDKVAYAFAPILLVWFLLIGGIGLYNLIKHDIGVLRAFNPKYIVDYMKRNGKEGWISLGGIFMCITGAEAMFADLGHFNVRAVQISFTFITFPTLVCAYSGQAAYLRKFPEQIGSTFYNSTPDLMFWPTFAVSVCAAIIASQAMISGAYAVIQQSQNLGCFPSVKVIHTSAKYEGQVYI…
5	75	Dicotyledons	Fabales		Medicago truncatula	8	MtHAK5-b	I:a	Medtr8g022130.1	MSTEGDCANMEEVEIKKWKETMNKKSLKERTTSMANSLTIKAGIVSNITNHSSKLGWMATLALAFQSLGVVYGDIGTSPLYVLASTFPKGIDHTDDILGVLSVIYYTILALPLLKYVFIVLKANDNGNGGAFALYSLLCRHANVSLIPNQQPEDMELSNYKLETPSSNQQLKKKLENSHFARVLLLFMTILGTTMVIGDGVFTPPMSVISAVNGISSKLGQDYVVSITIAILVILFCAQRFGTSKVGFSFAPILTIWFILIGATGIYNVFKYDVRVLLAINPKYIVDYFQRNGKNAWMSLGGVFLCISGCEAMFADLGHFNVRAIQMSFSFITLPAILAAYSGQAAYLRKFPHTVSNIFYECIPGPLYWPTFVVAVVASIIASQAIVSAAFSIISQALS…
5	76	Dicotyledons	Fabales		Medicago truncatula	9	MtHAK5-c	I:a	Medtr4g099260.1	MLGGEADRVSIEDETETTKEITEKKLKDRKVSWAKLRRVDSLNLEAGRVSMNANHNSKVGWSVTLTLAFQSIGIVYGDIGTSPLYVYASTFAKGIKNNDDILGVLSLIIYTIVLIPMLKYVFIVLWANDNGNGGAFALYSLICRHIKMSLAPNQQPEDMELSNYKLEIPSSQQKRAHKLKQMLENSHFARIILLLLAIMGTAMVIGDGILTPSISVLSAVSGISTSLGQNAVVGITVAILVVLFSLQRFGTDKVGVLFAPVILIWFIFIGGIGLYNLFKYDIGVLKAFNPKYIVDYFKRNGKEGWLSLGGVFLCITGSEAMFADLGHFSVRAIQISFSFVTFPAILTAYIGQAAYLRQFPDKVGNTFYESIPDPLYWPTFVVAIGAAIIASQAMISGAF…
5	77	Dicotyledons	Fabales		Medicago truncatula	10	MtHAK6	II:c	Medtr5g034500.1	MDLEGGTRRNSSKKDSWRTVLTLAYQSLGVVYGDLSISPLYVFRSTFGEGIGHSNTNEEIYGVLSLVFWSVTLVPLVKYVFIVLRADDNGEGGTFALYSLLCRYAKVNSLPNCQLADEELSEYKKDGCGGGVSNGKGFAFRLKSTLEKRKVLQKFLLVLALIGTCMVIGDGVLTPALSVFSAISGFELSMSKEHHAYVEVPVACIILVGLFALQHFGTHRVGFMFAPIVMAWLFCISAIGIYNIFHWNSQIYRALCPIYAFRFMRQNQTGGWMALGGVLLSITGSEAMFADLGHFSQLSIQIAFTSVVYPSLILAYMGQAAYLSRHHDTEHAYHFGFYVSVPEKLRWPVLVLAVFAAVVGSQAIITGTFSIIKQCSALNCFPRVKVVHTSSKIHGQIYI…
5	78	Dicotyledons	Fabales		Medicago truncatula	11	MtHAK7-a	V	Medtr5g070670.1	MENLRNNNSMTEEEDDPGSALSFDSTESRWVFQEDEDPSEIEDYDASDMRHQSMFDSEDEDNAEMKLIRTGPRIDSFDVEALEVPGAHTHHYEDMTTGKKIVLAFQTLGVVFGDVGTSPLYTFSVMFRKAPINDNEDILGALSLVLYTLILIPFLKYVLVVLWANDDGEGGTFALYSLICRNAKVNLLPNQLPSDARISGFRLKVPSAELERSLKLKERLESSFTLKKILLLLVLAGTSMVIANGVVTPAMSVLSSVNGLKVGVDAIQQDEVVMISVACLVVLFSLQKYGTSKVGLAVGPALFIWFCSLAGNGVYNLVKYDSSVFRAFNPIHIYYFFARNSTKAWYSLGGCLLCATGSEAMFADLCYFSVRSVQITFLFLVLPCLLLGYLGQAAYLMEH…
5	79	Dicotyledons	Fabales		Medicago truncatula	12	MtHAK7-b	V	Medtr2g008820.1	MDPEXASLSGGLRPLLYYCFISERSSCMIIINLALRTEDVRRTQCPNSKIVXADFDIDNYCRXSDFNYNHGRGMNFYKTTLCLAYQSLGIVYGDLSISPIYVYKSTFSGDMRLYEEDHEILGVLSMVFWTLTIIPLCKYIIFVLGADDNGEVFIGVGMIIGDGILTPTMSVLSAVYGIRIKAPDLHENYTVLIACIILVGLFALQHFGTHKVGFLFAPIMLTWLLCICGVGIYNIFRWNPGVIRALSPYYIYNFFKITGRVGWSSLGGIVLCITGTEAMFADLGHFSKLSIRFAFTALVYPCLVLAYMGEAAYLSKHKTDLHSSFYMAIPEVMFWPVFIIATLASVVGSQAIISATFSIVSQCRALQCFPRVKIKHTSNQIHGQIYIPEVNWMLMVLCL…
5	80	Dicotyledons	Fabales		Medicago truncatula	13	MtHAK8	II:c	Medtr6g007697.1	MDLESVIYKNPVKDDSWKHVLVLAYQSLGVVYGDLSTSPLYVYKSTFAEDIEHSDTNEEIFGVLSFVFWTLTLIPLLKYVFIVLRADDNGEGGTFALYSLLCRHARVSLMPNTQLADEDLAQYTMDETVAVDKKNVGSRLKSLLEKHRVFQRVLLVLALIGACMVIGDGVLTPAISVFSAISGLELSMSKEQHKYVEVPVACAILIFLFALQHYGTHRVGCLFAPVVLTWLICISTIGLYNIIHWNPHVYQALSPYYMFKFLKKTQWGGWMSLGGILLCITGSEAMYADLGHFNQLSIQIAFTFLVYPSLILAYMGQAAYLSKHHALESDYRIGFYVSVPVKLRWPVLAIAILQAVVGSQAIITGTFSIIKQCSSLGCFPKVKIVHTSSKIHGQIYIPE…
5	81	Dicotyledons	Fabales		Medicago truncatula	14	MtHAK10-a	III	Medtr4g094660.1	MASRVDTDEEGDNKGSMWDLDQKLDQPMEEEAGRLRNMYREKKFSALLILRLAYQSLGVVYGDLGTSPLYVFYNIFPNGVKDEEEVLGALSLIIYSLTLVPLLKYVFIVLRANDNGQGGTFALYSLLCRHAKIKTIPNQHRTDEELTTYSRSTFHERSFAAKTKRWLEERESWKSAILILVLAGTCMVIGDGILTPAISVLSAVGGIKVNQPHMGNGVVVLIAVVILVGFFSLQHYGTDKVSWLFAPIVLLWFLLIGGIGIFNICKYGSGVLKAFSPVYIYHYFRRGGKQGWTSLGGIMLSITGTEALFADLSHFPVSAVQLAFTLVVFPCLLLAYSGQAAYLMNNLTHSKDAFYRSIPERIYWPVFVVATAAAIVASQATITATFSIIKQALAHGCFP…
5	82	Dicotyledons	Fabales		Medicago truncatula	15	MtHAK10-b	III	Medtr2g438150.2	MASPLEIDEENDNKGSMWDLEQKLDQPMDAEAGRLRNMYREKKFSALLLLRLAYQSLGVVYGDLGTSPLYVFYNTFPRGVDDPEKVIGALSLIIYSLTLVPLLKYVFIVLRANDNGQGGTLALYSLLCRHANIKIIPNQHRTDEELTTYSRTTFHEKSFAAKTQRWLEEQKFIKSTILILVLVGTCMVIGDGILTPAISVLSAAGGIKVNKPEVDSGVVVLVAVVILVGLFSIQRYGTDRVGWLFAPIVLLWFLLIGGIGIYNLWRFGGSVLRAFSPLYVYRYLRDGRKDSWLSLGGILLSITGTEALFADLANFPVSSVQIAFTLVVFPCLLLAYSGQAAYLVNNLHHSQDVFYRSIPEKIYWPVFVIATLAAVVASQATITATFSIIKQALAHGCFP…
5	83	Dicotyledons	Fabales		Medicago truncatula	16	MtHAK10-c	III	Medtr2g438160.1	MASPLEIDEENDNKGSMWDLQQKFDQPMDAEAGRLKNMYREKKFSALLLLQLAYQSLGVVYGDLGTSPLYVFYNTFPYGVDDSEKVIGALSLIIYSLTLVPLLKYVFIVLRANDNGQGGTLALYSLLCRHANIKIIPNQHRTDEKLTTYSRTTFQEKSFAAKTQRWLEQHKFIKSTILILVLVGTCMVIGDGILAPAISVLSAAGGIKVNKPEVDSGVVVLVAVVILVGLFSIQRYGTDRVGWLFAPIVLLWFLLIGGIGIYNLWRFGGSVLRAFSPLYVYRYLRDGHKDSWLSLGGILLSITGTEALFADLANFPVSSVQIAFTLVVFPCLLLAYSGQAAYLVNNLHHSQDVFYRCIPEKIYWPVFVIATLAAVVASQATITATFSVIKQALAHGCFP…
5	84	Dicotyledons	Fabales		Medicago truncatula	17	MtHAK12	V	Medtr8g063840.1	MKLDRIEEGSVRLLGSSSGGSSESRWVDGSEVDWDEDPPWSHHGRDGREGYGSIRRRLVKKPKRVDSFDVEAMEIAAGHDQHSKDLSLWPTIALAFQTLGVVYGDMGTSPLYVFAGVFSKVPINSDDDVLGALSLVMYTIALIPLAKYVFIVLKANDNGEGGTFALYSLICRYANVNLLPNRQQADEQISSFKLKLPTPELERALKIKETLERTSIMKNVLLVLVLLGTSMIIGDGILTPAISVMSAISGLQDQINGFGTAEVVSISIVVLVALFSIQQFGTGKVGFMFAPVLALWFFSLGSIGVYNILKYDITVVRALNPAYIYYFFKNNGKSAWSALGGCVLCITGAEAMFADLGHFTVPAIQIAFTCVVFPCLLLAYMGQAAFLMKNPASYSSVFF…
5	85	Dicotyledons	Fabales		Medicago truncatula	18	MtHAK13	II:c	Medtr8g107510.1	MASQLHPAAHDSKNKRWNQTILLSIQIIGIVYGQLSTAPLYVFGTMRAQDLESEEVVYELFSFIFWTLTTISLIKYAIIVLKADDKGEGGIFALYSLLCRNAKVGLLPCDRTTDEVVLFEETTTPSSKINTDSKARRAIEKHKSCHYLILFLALFGSCMTIGAAVLTPALSVLSASYGVQRSLSDLAQLYVPVPSACVILIGLFVLQPCGTHKIGFMFAPIIAVWLLFVGVVGACNIFIWDVKIIYKISPLYLFKFVRNIDVKRWRLLGSAILCAAGSEAMFAGLGHFSKKSIKITFICLIYPLLVICYAGQAAYISKNLNTRDFNHLSQSVPRPSKHVFIVLSLLSSAVGSQATITASFSIINQCLALNCFPRVKVIHTSKTIHGQIYISDVNWLLMI…
5	86	Dicotyledons	Fabales		Medicago truncatula	19	MtHAK14-a	I:b	Medtr8g063900.1	MSSEPKVVIKEEEDNNTEHNHHDNRVYDHSHFSTQKRDSLDMESRSLPSSSHASKGPSMAVIMQLAFQSMGIVYGDLGTSPLYVYTSIFANGVKDNDDILGVFSLIFYTITLVTLVKYVFIVLRATDNGDGGTFALYSLICRYAKVGILPNQQIEDAEVSNYKLESPKDSSMKRASWLKSIIEKSYTIKILLLLVTMLGTSMVIGDGILTPCISVLSAMGGIKVAAPSITDNMVVELSICVLIFLFMVQRLGTDKVGYSFAPIMCLWFTMIGGIGLYNSIKYDPTVLKALNPKYIVEYFIRNKKDAWISLGGVVMCITGAEALFADVGHFTVRSIQISTCGLVYPALILAYTGQSSYLRKHNDAATDAFYKSVPHALYWPMFVVAVMAAIIASQSLISG…
5	87	Dicotyledons	Fabales		Medicago truncatula	20	MtHAK14-b	I:b	Medtr7g108480.1	MALEEEAVVVNMESIQQNHVSDHPRVPIQEKKQLSLQKYRRNDSLEMESRTISHARYSKGPSTAIILQLAFQSIGIVYGDIGTSPLYVFSSTFTDGIKHNDDILGVLSLIFYTLTLIPLLKYVFFVLRATDNGDGGTFALYSLICRYARVGLIPNQQLEDADVSNYQLQLPNNRREKRASKVKSILENSHFIKLFLLFATMLGTSMVIGDGVLTPCISVLSAVGGIKQADSQITDDQIVLISVAILIGLFMVQRFGTDKVGYSFAPIICIWFTFIGGIGIYNFITHDASVIKAINPKYIVDYFIRNKKDAWISLGGVVLSITGTEALFADVGHFTVRSIQISMCSVTYPALILAYAGQASFLRKNNDLVGETFYKSIPDSLYWPMFVIAVLAAIIASQA…
6	88	Dicotyledons	Fabales	Chickpea	Cicer arietinum	1	CiaHAK1	I:a	>cam:101500148	MNGGEADQVKIEEEKETMKNDTEKKLKDRKVSWAKLRRVDSLNLEAGRVTMAENNHSKMGWSMTLMLAFQSIGIVYGDIGTSPLYVYASTFTDGIKNNDDILGVLSLIIYTIVLIPMLKYVFIVLWANDNGNGGAFALYSLICRHINVSLAPNQQPEDMELSNYNLEIPSTKQKRAHRLKQKLEKSHFARILLLLLAIMGTSMVIGDGILTPSISVLSAVSGISKSLGQDAVVGITVAILIVLFAMQRFGTDKVGALFAPIILIWFAFIGGIGIYNLFKYDVGVLRAFNPKYIVDYFKRNGKDGWLSLGGVFLCITGSEAMFADLGHFSVRAIQISFTCITFPAILAAYIGQAAFLRKFPEKVADTFYDSIPDPLYWPTFVVAVAAAIIASQAMISGAF…
6	89	Dicotyledons	Fabales	Chickpea	Cicer arietinum	2	CiaHAK2	I:b	>cam:101506607	MESRIFSTSHTRASKGPSTATVLQLAFQSIGIVYGDIGTSPLYVFSSTFSDGIKHNDDILGVFSLIFYTLTFIPLFKYVFIVLHATDNGNGGTFALYSLICRYARVGLIPNEELEDAQVSNYQLQLPNNRDKRAFKLKSMLENTHFFKLFLLFATMLGTSMVIGDGVLTPCISVLSAVGGIKQAASQVTDGILIGLFMAQRFGTDKVGTSFAPILCIWFTFIGGIGVYNFVKHDPSVIKAINPKYIVDYFIRNKKDAWISLGGVVMAITGTEALFADVGHFTVRSIQISMCSVTYPALILAYAGQASFLRKNSDLVNDTFYKSIPDSLYWPMFVIAILAAIIASQAMISGTFSIIQQSLSLGCFPRVQIVHTSTKYEGQVYIPEVNYILMIACVAITVG…
6	90	Dicotyledons	Fabales	Chickpea	Cicer arietinum	3	CiaHAK3	V	>cam:101494637	MKLDRIEESSSSVRLLGGRSKSSSDGASSESRWVDGSEVDWDEAPPWSNKNDNHGSDGGREGYGSNSIRRRLIKKPKRVDSFDVQAMQIAASHDQHSKDLSLLPTIALAFQTLGVVYGDMGTSPLYVFADVFSKVPIGSDDDVLGALSLVMYTIALIPLAKYVFIVLKANDNGEGGTFALYSLICRYANVNLLPNRQQADEQISSFKLKLPTPELERALKIKEALERTSFLKNALLVLVLIGTSMIIGDGILTPAISVMSAISGLQDQVNGFGTGEVVGVSIVVLVALFSIQRFGTGKVGFMFAPVLALWFFSLGSIGIYNILKYDITVLRAFNPAYIFYFFKNNGKSAWSALGGCVLCITGAEAMFADLGHFSVPAIQIAFTCVVFPCLLLAYMGQAA…
6	91	Dicotyledons	Fabales	Chickpea	Cicer arietinum	4	CiaHAK4	V	>cam:101513193	MADDSGEINGGFSMDSTESRWVFQDEEYASDIEEYESDFRFRGHATVPPDSEDEDSARQKLIRTGPRIDSFDVEALDVPGAHKNNDYQDISVGKKIVLAFQTLGVVFGDVGTSPLYTFSVMFRKTPINGNEDIIGALSLVLYTLVLFPLVKYVMVVMWANDHGEGGTFALYSLICRHAKVSLLPNQLPSDARISSFRLKVPSPELERSLKIKERLETSLTLKKTLLILVLAGTSMVIANGVVTPAMSVLSSVGGLKVGVDAIKQDEVVMISVACLIVLFSVQKYGTSKVGLAVGPALFIWFCSLAGIGIYNLVKYDSSVLRAFNPIHIYYFFKRNSTKAWYSLGGCLLCATGSEAMFADLCYFSVRSVQLTFVFLVLPCLLLGYLGQAAYLMENHADAG…
6	92	Dicotyledons	Fabales	Chickpea	Cicer arietinum	5	CiaHAK5	III	>cam:101513186	MASRVDTDEEGDNKGSMWDLDQKLDQPMDEEAGRLRNMYREKKFSALLILRLAYQSLGVVYGDLGTSPLYVFYNTFPNGVKDEEQVLGALSLIIYSLTLVPLLKYVFIVLRANDNGQGGTFALYSLLCRHAKIKTIPNQHRTDEELTTYSRSTFHERSFAAKTKKWLEEHESWKSAILILVLAGTCMVIGDGILTPAISVLSAVGGIKVNKPGMDSSVVVLVAVVILVGFFSMQHFGTDRVSWLFAPIVLLWFLLIGGIGIFNIWKHGFRVLKAFSPVYIYHYFKRGGKEGWTSLGGIMLSITGTEALFADLAHFPVSAVQLAFTLVVFPCLLLAYSGQAAYLMDNLTHSRDAFYRSIPDRIYWPVFVVATAAAIVASQATITATFSIIKQALAHGCFP…
6	93	Dicotyledons	Fabales	Chickpea	Cicer arietinum	6	CiaHAK6	II:a	>cam:101502227	MEHQTTPSSSHNPSQLSWINLSRNLLLAYQSFGVVYGDLSTSPLYVYTSTFKGKFKNHHDEETIFGVFSLIFWTLTLIPLLKYVFIILSADDNGEGGTFALYSLLCRHAKFNLLPNQQAADEELSSYKYGPSSPQMVASSPLKMFLEKHKRSRTALLVVVLFGASMVIGDGVLSPAISVLASVSGLKVTKTKFNDGELVLLACVILVGLFALQHCGTHRVAFMFAPIVIIWLLSIFLVGIYNTIHWNPKIVYAISPQYIIKFFIKTGAEGWISLGGILLCITGSEAMFADLGHFTASSIRIAFAFVIYPCLVMQYMGQAAFLSKNLKSVHNSFYDSLPGPVFWPVFVIATMAAIVGSQATITATFSIVKQCHELGCFPRVKVVHTSKHIFGQIYIPEIN…
6	94	Dicotyledons	Fabales	Chickpea	Cicer arietinum	7	CiaHAK7	V	>cam:101496674	MENPRHRRLMDEDEDPGSALSVDSTESRWVFQEDEDPSEIEEYDASDMRHQSMFDSEDEDNADQRLIRTGPRIDSFDVEALEVPGAHRNDYEDISMGKRIVLAFQTLGVVFGDVGTSPLYTFSVMFRKAPINDNEDILGALSLVLYTLILIPLVKYVLVVLWANDDGEGGTFALYSLICRNAKVNLLPNQLPSDVHISGFRLKVPSPELERSLKIKERLENSLTLKKILLLLVLAGTSMVIANGVVTPAMSVLSSVNGLKVGVDAIEQDEVVVISVACLVVLFSVQKYGTSKVGLAVGPALFIWFCSLAGNGVYNLIKYDSSVLRAFNPIHIYYFFARNSTKAWYSLGGCLLCATGSEAMFADLCYFSVRSVQVMNHVYVLSIMASGCISFVISAYILM…
6	95	Dicotyledons	Fabales	Chickpea	Cicer arietinum	8	CiaHAK8	II:c	>cam:101510722	MDLHPGKCWDNSKKGSWKTIMLLAYQSLGVVYGDLSISPLYVFTSTFAEDIEHSETNEEIFGTLSFVFWTLTLIPLFKYVFVVLRADDNGEGGTFALYSLICRHAKVSLIPNRQHADEALSTYKMEEAPEKDTNKMKMLLEKYKALHTALLIVVLLGTCMVIGDGVLTPAISVFSAVSGLEVSMSKTHHQYAVIPITCFILVCLFALQHYGTHKVGFFFAPIVLTWLLCISTLGIYNILKWNPHIYTALSPYYMFKFLKKTRISGWLSLGGILLCITGSEAMFADLGHFTYMAIQIAFTFLVYPALILAYMGQAAYLSCHHNSDLQISYYVSVPESVRWPVLILAILASVVGSQAIISGTFSIINQSQSLGCFPRVKVVHTSDKIHGQIYIPEINWILM…
6	96	Dicotyledons	Fabales	Chickpea	Cicer arietinum	9	CiaHAK9	II:c	>cam:101507864	MDLESVIHKNPIKEESWKTVLVLAYQSLGVVYGDLSTSPLYVYKSTFAEDIQHSETNEEIFGVLSFVFWTLTLIPLLKYVFIVLRADDNGEGGTFALYSLLCRHARVSLMPNTQLADEDLTQYTMNDEIVEINKKNVGSRLKSLLEKHRVLQRVLLVLALIGTCMVIGDGVLTPAISVFSAISGLELSMSKEQHKYVEVPVACIILIFLFALQHYGTHRVGCLFAPVVLTWLICISTIGVYNIIHWNPHVYEALSPYYMFKFLKKTQWGGWMSLGGILLCITGSEAMYADLGHFSQLSIKIAFTFLVYPSLILAYMGQAAYLSKHHSNESDYRIGFYVSVPVKLRWPVLGIAILQAVVGSQAIITGTFSIIKQCSSLGCFPKVKIVHTSSKMHGQIYIP…
6	97	Dicotyledons	Fabales	Chickpea	Cicer arietinum	10	CiaHAK10	II:b	>cam:101509470	MYVFSAMNPSEQFVEHGMSQQNLKRTSCVNVLTLAYQSLGVVYGDLSTSPLYVYKTSFSGKLSLKEDDEEIFGVLSFIFWTFTIIALFKYVFIVMSADDNGEGGTFALYSLLCRHARLSILPNQQPTDENLSAYSTENSADTWQSSLLKLFFEKHPRFQKGLLIFVLLGTCMTIGDGVITPAISVFSAVSGVQVKINQLHDNYVVIVSCIILVGLFSIQHHGTHRVAFMFAPVVAAWLLCISGIGIYNIFRWNRQVYRALSPLYMLRFLKTTGIEGWLPLGGVVLSITGVETMYADMGHFSALSIKIAFTCLVYPCLILAYMGEAAFLSKHHYDIQRSFYKAIPEAVFWPVFIVATFAAVVGSQAVISATFSIISQCCALNCFPRVKIVHTSRKIYGQI…
6	98	Dicotyledons	Fabales	Chickpea	Cicer arietinum	11	CiaHAK11	II:b	>cam:101502326	MYLFSAMNPSEQFVEHGISQQNLKRTSCVNVLTLAYQSLGVVYGDLSTSPLYVYKTSFSGKLSLKEDDEEIFGVLSFIFWTFTIIALFKYVFIMMSADDNGEGGTFALYSLLCRHARLSILPNQQPTDENLSAYSTENSADTWQSSLLKLFFEKHPRFQKGLLIFVLLGTCMTIGDGVITPAISVFSAVSGVQVKINQLHDNYVVIVSCIILVGLFSIQHHGTHRVAFMFAPVVAAWLLCISGIGIYNIFRWNRQVYRALSPLYMLRLLKTTGIEGWLSLGGVVLSITGVETMYADMGHFSALSIKIAFTCLVYPCLILAYMGEAAFLSKHHYDIQRSFYKAIPEAVFWPVFIVATFAAVVGSQAVISATFSIISQCCALNCFPHVKIVHTSRKIYGQI…
6	99	Dicotyledons	Fabales	Chickpea	Cicer arietinum	12	CiaHAK12	II:c	>cam:101505394	MDLESGTRRNTKNDSWKTVLTLAYQSLGVVYGDLSISPLYVFRSTFGEGIGHSETNEEIYGVLSLVFWSVTLVPLFKYVFIVLKADDNGEGGTFALYSLLCRHAKVNSLPNCQLADEELYEYKNDAYAFTHDNNKSFAFKLKATLEKREVLQKVLLVLALIGTCMVIGDGVITPALSVFSAVSGLELSMSKEHHAYVELPAACIILIGLFGLQHFGTHRVGFLFAPIVIIWLFCISAIGVYNIFYWNPQIYHALSPFHAFRFIKKTQTGGWMSLGGILLSITGSEAMFADLGHFSQLSIQIAFTSVVYPSLILAYMGQAAYLSRHHEIEHMYQLGFYVSVPEKLRWPVLVIAVFAAVVGSQAIITGSFSIIKQCSALNCFPRVKVVHTSSKIHGQIYIP…
6	100	Dicotyledons	Fabales	Chickpea	Cicer arietinum	13	CiaHAK13	IV	>cam:101494703	MEEEDAHLHPPSSNHNDVVLNLPDLHASHSQPQHENDKKDTLLLAYKTLGVVFGGLVTSPLYVYPSMPLNSPTEEDYLGIYSIMFWTLTLIGLVKYANIAIKADDHGEGGTFALYSLLCRHFNIGILPSKQVGLNSSRATETHTWLTKLFETSLVARRLLLFIAMLGTCMLIGDGILTPAISVLSAMDGVRAPFPSVSKSLVESLSAIVLIFLFLLQKFGTSRVSFLFSPIMGAWTLCTPLVGIYSIVHNYPTIFKALSPHYIFQFFWRNGKSGWLLLGGTVLCITGSEAMFADLGHFNPRSIQIAFLFTIYPSLVLTYAGQTAYLIKNPNDHNDGFYKFIPTPVYWPIFIIATLAAIVASQSLISATFSVIKQSVVLDYFPRVKIVHTSHYTEGEVYS…
6	101	Dicotyledons	Fabales	Chickpea	Cicer arietinum	14	CiaHAK14	II:a	>cam:101509530	MSSSDANRQRGSSTTVECKSQYKAPLFLAYQSLGFLFGDISLSPLYVYQSIFSGRLKHVQNEDAIFGAFSLIFWTLSLISMFKYAVIMLSADDNGEGGTVALYSHLCRNAKFCLLPNHQASDEELSTYRKPGYSNRNIPTSSLKKFIEKNKNTKIVLLVFVLLGACMVICVGALMPAISVLSSVEGLKIEAKIKNESIVPLISCVLLVGLFVLQHRGAHTVAFMFPPVIILWLLSIFAIGIYNVIKWNPRIYQALSPYYIFKFFLVTGKDGWVNLGGVFLCVAGTEAMFTDLGYYKKAPVRAAFSFVIYPCLILQYMGQAAFLSQNLSAVPISFYASIPDVLFWPVFVVAALAAIVASQAVISSTFSIVQQCHAFECFPRVKAVHSRRWIDGQTYIPEI…
6	102	Dicotyledons	Fabales	Chickpea	Cicer arietinum	15	CiaHAK15	II:c	>cam:101489438	MASQFHPLFKTNTKTWNQSILLSFQIIGVVYGQLSTAPLYVFGTMRVEDLESEEVVYELFSFIFWTLTIISLIKYALIVLKVDDKGEGGTFALYSLLCRNAKVGLLPCDRTANEVTLHDQDTSTPNNKNNSSDSRTRKAIEKHKSCHYLILFLALFGSCMTIGVAVLTPALSVLSASYGVQRSLSDMAHLFNSSQHTQDLVSNALYKYVPVPAACVILVALFVVQSCGTQKIGFMFAPIISVWLLFVGVVGAYNIFYWDVKIIYKISPVYMFKFVMNVNVSRWRLLGSTILCAAGSEAMFADLGHFSKKSIKITFICLIYPILVICYAGQAAYISKNLQERDFNHLSQSMPSHIKHVFIVLSLLSSAVGSQATITASFSIINQCLALNCFPRVKVIHTS…
7	103	Dicotyledons	Fabales	Soybean	Glycine max	1	GmHAK1	II:a	>Gmax_v1.1|Glyma02g07476|Glyma02g07476.1	MELESGVSTSQKNPAKVLSWVNLSKYLLLAYQSFGVVYGDLSTSPLYVYTSTLSGKLQNHRHEEVIFGIFSLIFWTLTLIPLLKYAVIILNVDDNGEGGTFALYSLLCRHANFSLLPNQQAADEELFLENHRSLKTALLVMMLLGACMVIGDGVFSPAISILASVSGLRTTKTKFTDGEVVLIACVILVGLFALQRYGTHKVVFVFAPVVIIWLVSIFSIGLYNIIRWNPKKFCAISPNYLIKFFIKTGKEGWISLGGMLLCITGTEAMFADIGHFTTVSIRLAFSFVIYPCLVVQYMDQAAFLSKNLNSVHNSFYDSTEPILWPVFVIATLTSIVGSQAIITATFSIIKQCHHMFGQTYIPEINWILMILTLAVTIGFQDTTLIGNAYGLAYMTVMFV…
7	104	Dicotyledons	Fabales	Soybean	Glycine max	2	GmHAK2	II:b	>Gmax_v1.1|Glyma02g39370|Glyma02g39370.2	MNPSEQFVEHGMSQQNLKRTSCATVLTLAYQSLGIVYGDLSTSPLYVYKTTFSGKLRLKEDEEEIFGVLSFIFWTFTIIALFKYVFIVMSADDNGEGGTFALYSLLCRHARLSILPNQQATDEKLSAYTTQDSADTWLSANLKLFFEKHPRFQKGLLIFVLLGTCMTIGDGVITPAISVFSAVSGVQVKIKGLHENYVVIISCVILLVLFSIQHHGTHRVAFMFAPVVAAWLLCISGIGVYNIFYWNRQIYRALSPLYMLKFLRATGIEGWMSLGGVVLSITGVEAMYAALGHFSALSIKVAFTCLVYPCLILAYMGEAAFLSKHHHDIQESFYKAIPETVFWPVFIVATLAAIVGSQAVISATFSIVSQCCALNCFPPVKIVHTSSRIYGQIYVPEVN…
7	105	Dicotyledons	Fabales	Soybean	Glycine max	3	GmHAK3	II:c	>Gmax_v1.1|Glyma02g03830|Glyma02g03830.1	MDPEGGTTRQNSAKRESWRTVLTLAYQSLGVVYGDLSISPLYVFRSTFAEDIKHTESNEEVFGVLSLVFWTITLVPLLKYVFVVLKADDNGEGGTFALYSLLCRHAKVSSLPNYQVADEELQEYKKDSRGAAPETSFARGSAALFSAVSGLELSMSKEKHTYVEVPAACIILIGLFALQHYGTHRVGFLFAPVIITWLFCLSTIGIYNIFYWNLHVYKALSPYYAFQLLRKTQKGGWMALGGILLCITGSEAMFADLGHFTQLSIKIAFTSVVYPSLILAYMGQAAYLSKHHNIAQDYHFGFYESVPEKLRWPVLVIAILAAVVGSQAIITGTFSIIKQCSSLSCFPRVKVIHTSSKIHGQIYIPEINWLLMMLCLAVTICFRDTKRLGHAAGLAVITV…
7	106	Dicotyledons	Fabales	Soybean	Glycine max	4	GmHAK4	II:b	>Gmax_v1.1|Glyma11g27830|Glyma11g27830.2	MNPSEHSMEQGVSQQNFKRTSCTTVLTLAYQSLGVVYGDLSTAPLYVYKTTFSGKLSLKEDDEEIFGVLSFIFWTFTIIALFKYVFIVMSADDNGEGGTFALYSLLCRNGRLSILPNQQSTDEKLSTYGTEDFADTWQSSILKLFFEKHPGIRKGLLIFVLIGTCMAIGDGVITPSISVLAAVSGVKVKISELHDNYVIMVSCVILVGLFSIQHHGTHRVAFLFAPVVATWLLCISSIGIYNIFHWNPKVYRALSPIYMAKFIKTTGIEGWLSLGGVVLSITGVETMFSNLGHFSALTIKIAFTCLVYPCLILAYMGEAAFLSRHHEDIQRSFYKAIPEAVFWPVFIVATFAAILRSQAVISATFSIISQCHALNCFPSVKIIHTSTRIYGQIYIPEVN…
7	107	Dicotyledons	Fabales	Soybean	Glycine max	5	GmHAK5	II:c	>Gmax_v1.1|Glyma06g14890|Glyma06g14890.2	MDLESSKCWDTSKGSWKTILLLAYQSLGVVYGDLSISPLYVYTSTFAEDIEHSETNEEIFGALSFVFWTLTLVPLFKYVFVVLRADDNGEGGTFALYSLICRHAKVSLLPNRQHADEALSTYKMEEAPEKDTSKVKMMLEKYKGLHTALLIVVLLGTCMVIGDGLLTPAISVFSAVSGLEVSMSKKHHQYAVIPITCFILVCLFALQHYGTHRVGFLFAPIVLAWLLCISTLGLYNIFKWNPHVYKALSPYYMFKFLKKTRISGWMSLGGILLCITGSEAMFADLGHFSYMAIQIAFTFLVYPALILAYMGQAAYLSHHHDSELQISFYVSVPESVRWPVLILAILASVVGSQAIISGTFSIINQSQSLGCFPRVKVVHTSDKIHGQVYIPEINWILMI…
7	108	Dicotyledons	Fabales	Soybean	Glycine max	6	GmHAK6	II:c	>Gmax_v1.1|Glyma04g39960|Glyma04g39960.2	MDLESSKCWDTSKDSWKTILLLAYQSLGVVYGDLSISPLYVYTSTFAEDIEHSETNEEIFGALSFVFWTLTLVPLFKYVFVVLRADDNGEGGTFALYSLICRHAKVSLLPNRQHADEALSTYKMEEAPEKDTSKVKMVLEKYKGLHTALLIVVLLGTCMVIGDGLLTPAISVFSAVSGLEVSMSKKHHQYAVIPITCFILVCLFALQHYGTHRVGFLFAPIVLAWLLCISTLGLYNIFKWNPHVYKALSPYYMFKFLKKTRISGWMSLGGILLCITGSEAMFADLGHFSYMAIQIAFTFLVYPALILAYMGQAAYLSHHHDSELQISFYVSVPESVRWPVLILAILASVVGSQAIISGTFSIINQSQSLGCFPRVKVVHTSDKIHGQVYIPEINWLLMI…
7	109	Dicotyledons	Fabales	Soybean	Glycine max	7	GmHAK7	II:c	>Gmax_v1.1|Glyma08g06060|Glyma08g06060.2	MDSHLDAIFDEDHKKKTWKQTTLLSFQIVGIVYGQLSTAPLYVFGTMQKGDLASEEVVYELFSFIFWTLTIISLVKYASIVLKADDEGEGGIVALYSLLCRNAKVGLLPCDKSANEVVLYEERSGSKLKADSRARRAIEKHKICHYLILFLALFGSCMTIGDAVLTPALSVYSASTGVQRSLTDILTDIFAWSPDTQQNVSNGLRRYVPVPSACVILVGLFMLQHCGTRKIGIMFAPIITAWLLFVAGVGTYNVFHWDVKIIYKISPVYIYKFITHIDIHRWRLLGSVILCVAGSEAMFADLGHFSKKSIKITFICLIYPLLLLCYAGQAAYISKNLHAPDFNHLSQSMPRHCRHLFIVLSLLSSAVGSQATITACFSIINQCLALNCFPRVKVIHTSK…
7	110	Dicotyledons	Fabales	Soybean	Glycine max	8	GmHAK8	II:a	>Gmax_v1.1|Glyma08g02290|Glyma08g02290.1	MSSDASRERGASTVVELKFQYRALLFLAYQSLGFMFGDLTLSPLYVYQSIFSGRLKKVQNEDAIFGAFSLIFWTLSIISLLKYAIIMLSADDNGEGGIVALYSHLCRNAKFCLLPNHQASDEELSTYHKPGSSNRSIPPSPLKRFIEKHKSTKTVLLIFVLLGACMIICVGALMPAISVRSSVEGLKIEAKITNKSMVSLISCVLLIGLFVMQHRGSYKVAFVFPPIIILWLLTIFMIGIYNVIKWNPRVYQALSPYYIYKFFRLTGKDGWTNLGGVFLCVTGTEAMFADLGYYRQTPVRAAFCCVIYPCLVLQYMGQAAFLSKNLSAVPISFYASIPDILFWPVFVVAALAVIVASQAVIASTFSIVQQCHAFECFPRVKAVHSRRWIPGQTYIPEIN…
7	111	Dicotyledons	Fabales	Soybean	Glycine max	9	GmHAK9	III	>Gmax_v1.1|Glyma08g09140|Glyma08g09140.2	MGSRVDTDEDNDNRGSMWDLDQKLDQPMDEEAGRLRNMYREKKFSALLLLRLAFQSLGVVYGDLGTSPLYVFYNTFPNGVKDEEDVIGALSLIIYSLTLVPLLKYVFVVLRANDNGQGGTFALYSLLCRHAKIKTIPNQHRTDEELTTYSRSTFHERSFAAKTKRWLEEQESAKRAILILVLVGTCMVIGDGILTPAISVLSAVGGIKVNQPRMSSGVVVLVAVVILVGFFSMQHYGTDRVSWLFAPIVLLWFLLIGGIGIFNIWKYGSGVLKAFSPVYIYRYFRRGGKEGWTSLGGIMLSITGTEALFADLAHFPVSAVQLAFTLVVFPCLLLAYSGQAAYLMNNLTHSQDAFYRSIPDRIYWPVFIIATLAAIVASQATITATFSIIKQALALGCFP…
7	112	Dicotyledons	Fabales	Soybean	Glycine max	10	GmHAK10	V	>Gmax_v1.1|Glyma08g39840|Glyma08g39840.1	MREDRIEEISTRLLLGRSSSGGSSESRWVDGSEVDWDEVPMWSKHDDGREGYGSIRRRLTKKPKRVDSFDVEAMEIAGTHAHHSKDLSLWPTIALAFKTLGVVYGDMGTSPLYVFADVFSKVPIGSDDDILGALSLVMYTIALIPLAKYVFIVLKANDSGEGGTFALYSLICRYANVSLLPNRQQADEQISSFKLKLPTPELERALRIKDTLERTPFLKNLLLVLVLLGASMVIGDGILTPAISVMSAISGLQDQIDEFGTGEVVGISIVVLVALFSIQRFGTSKVGFMFAPILALWFFSLGAIGIYNILKYDITVLRAFNPAYIYYFFKNNGKDAWSALGGCVLCITGAEAMFADLGHFSVPAIQIAFTCVVFPCLLLAYMGQAAFLTKNPNSYASVF…
7	113	Dicotyledons	Fabales	Soybean	Glycine max	11	GmHAK11	V	>Gmax_v1.1|Glyma08g07720|Glyma08g07720.2	MANPKTKSHHSLGGEDDLDSTESRWVFQEDEEDPSEIEDFDAADLRHQAMFDSDDEDNAEQRLVRTGPRIDSFDVEALEVPGAHRNDYEDVSVGKGIVLAFQTLGVVFGDVGTSPLYTFSVMFRKAPINGNEDILGALSLVLYTLILIPLVKYVLVVLWANDDGEGGTFALYSLICRNAKVSLLPNQLRSDARISGFRLKVPSAELERSLKIKERLETSVTLKKILLLFVLAGISMVMANGVVTPAMSVLSSLNGLKVGVDAIKQDEVVMISVACLVILFSVQKYGTSKVGLAVGPALFIWFCSLAGIGIYNLVKYDSSVLRAFNPIHIYYFFARNPTKAWYSLGGCLLCATGSEAMFADLCYFSVRSVQLTFVFLVLPCLLLGYLGQAAYLMENHADA…
7	114	Dicotyledons	Fabales	Soybean	Glycine max	12	GmHAK12	IV	>Gmax_v1.1|Glyma08g09720|Glyma08g09720.2	MREDFNSLMTEDSRKNGIDEYRKNSLNDKGLGPCCHKVGVGTAELGSLENGNILFQKLSQQTLAKEFFSMEVLIHERYITPIGPTSYLSPYQITGSLSGGLRLLILLLAVGLVRVCFVCLLTQHEGQSMESRVHLPCSNDVVVHVNGDSAPDARRFHPTNDAFPPQQQQQQHQEHGKERRGSLVLAYKTLGVVFGGLVTSPLYVYPSMPLKSPTEDDYLGIYSIMFWTLTLIGVVKYANVAIRADDHGEGGTFALYSLLCRHVNIGILPSKHVGLNTTKDVQKSTSLARFFQTSVVARRLLLFVAMLGTCMLIGDGILTPAISVLSAMDGLRAPFPSVSKTLVETLSAIVLIVLFLLQKFGTSRVSFLFSPIMGAWTLSTPLVGIYSIIHHYPSIFKAL…
7	115	Dicotyledons	Fabales	Soybean	Glycine max	13	GmHAK13	V	>Gmax_v1.1|Glyma08g19120|Glyma08g19120.1	MAEEINGGTSMDSTESRWVIQDEDEDASDLENFDADLRFRRHAGVVDSEDEDDNAEQRLIRTGPRIDSFDVEALEVPGAAHRTDYEDISVGKKIVLAFQTLGVVFGDVGTSPLYTFSVMFRKAPINGNEDILGALSLVLYTLILIPLVKYVLVVLWANDDGEGGTFALYSLICRHAKVSLLPNQLPSDARISSFRLKVPSPELERSLKIKERLENSLTLKKTLLFFVLAGTSMVIANGVVTPAMSVLSSVGGLKVGVDAIKKDEVVMISVACLIILFSVQKYGTSKMGLAVGPALFLWFCSLAGIGIYNLVKYDSSVLRAFNPIHIYYFFKRNSTKAWYSLGGCLLSATGSEAMFADLCYFSVRSVQLSFVFLVLPCLLLGYLGQAAYLMENHADAGQA…
7	116	Dicotyledons	Fabales	Soybean	Glycine max	14	GmHAK14	II:c	>Gmax_v1.1|Glyma08g39860|Glyma08g39860.2	MDLERAIVQNSDKRKESWKTVLTLAYQSLGVVYGEISTSPLYVYRNTFAEDIGHSETNEEIYGVLSLVFWTLTLVPLVKYVFIVLKADDNGEGGTFALYSLLCRHARVGLLPNCQLADEELSEYRRNDCGVAPERSLAFRLRSLLERYKVLQRILLVLALLGTCMVIGVGVLKPAISVFSAVSGLELSMSKEHHRYVEVPGACIILIGLFALQRYGTHRVGFLFAPIVCIWLFCISAIGIYNIFYWNPHVYQALSPYYVFQFLKKTRRGGWMALCGILLCITGSEAMFAGLGHFSQLSLKIAFTSLVYPSLILAYMGQAAYFSRHHDVEQEYHFGFYVSVPEKLRWPVLVIAILAAVVGSQSIITGTFSIIRQCSALSCFPRVKVVHTSSKVHGQVYIP…
7	117	Dicotyledons	Fabales	Soybean	Glycine max	15	GmHAK15	II:c	>Gmax_v1.1|Glyma13g23960|Glyma13g23960.1	MDLESVIHRNTIKEESWKTVLTLAYQSLGVVYGDLSTSPLYVYKSAFAEDIQHSDTNEEIYGVLSFVFWTLTLIPLLKYVFIVLRADDNGEGGTFALYSLLCRHARVSLLPNTQLADEHLTEYTMDNGTVPVNRKNVGLGLKNLLEKHRVLQRVLLVLALIGTCMVIGDGVLTPAISVFSAVSGLELSMSKEQHRYVEVPVACVILIFLFALQHYGTHRVGSLFAPVVLTWLLCISAIGVYNIFHWNPHVYEALSPYYMFKFLKKTQKGGWMSLGGILLCITGSEAMYADLGHFSQLSIKIAFTFLVYPSLILAYMGQAAYLSRHHSLESDYRIGFYVSVPVKLRWPVLAIAILQAVVGSQAVITGTFSIIKQCSAMGCFPKVKIIHTSSKMHGQIYIP…
7	118	Dicotyledons	Fabales	Soybean	Glycine max	16	GmHAK16	II:a	>Gmax_v1.1|Glyma05g37270|Glyma05g37270.1	MSSDASRERGASTVVGLKFQYRALLFLAYQSLGFMFGDLTLSPLYVYQSIFSGRLKNVQHEDAIFGAFSLIFWTLSIISLLKYAIIMLSADDNGEGGIVALYSHLCRNAKFCLLPNHQASDEELSTYHKPGSSNRNIPPSPLKRFIEKHKSTKTVLLIFVLLGACMVICVGALMPAISVRSSIEGLKIEAKITNKSMVSLISCVLLIGLFVMQHRGSYKVAFMFPPIIILWLLTILMIGIYNVIKWNPRVYQALSPYYTYKFFRLTGKDGWTNLGGVFLCVTGTDAMFADLGYYRQTPVRVAFFCIIYPCLVLQYMGQAAFLSKNLSAVPISFYASIPDILFWPVFVVAALAVIVASQAVIASTFSIVQQCHAFECFPRVKAVHSRRWIPGQTYIPEIN…
7	119	Dicotyledons	Fabales	Soybean	Glycine max	17	GmHAK17	III	>Gmax_v1.1|Glyma05g26210|Glyma05g26210.2	MGSRVDTDEDSDNRGSMWDLDQKLDQPMDEEAGRLRNMYREKKSSALLLLRLAFQSLGVVYGDLGTSPLYVFYNTFPNGVKDEEDVIGALSLIIYSLTLVPLLKYVFVVLRANDNGQGGTFALYSLLCRHAKIKTIPNQHRTDEDLTTYSRSTFHEKSFAAKTKRWLEEQESAKRAILILVLVGTCMVIGDGILTPAISVLSAVGGIKVNQPRMSSGVVVLVAVVILVGFFSMQHYGTDRVSWLFAPIVLLWFLLIGGIGIFNIWKYGSGVLKAFSPVYIYRYFRRGGKEGWTSLGGIMLSITGTEALFADLAHFPVSAVQLAFTLVVFPCLLLAYSGQAAYLMNNLTHSQDAFYRSIPDRIYWPVFIVATLAAVVASQATITATFSIIKQALALGSFP…
7	120	Dicotyledons	Fabales	Soybean	Glycine max	18	GmHAK18	V	>Gmax_v1.1|Glyma05g24530|Glyma05g24530.1	MANPKTKSHHSLGGEDDPDSTESRWVFQEDEDPSEIEDFDAADLRHQSMFDSDDEDNAEQRLVRTGPRIDSFDVEALEVPGAHRNDYEDVSVGKGILLAFQTLGVVFGDVGTSPLYTFSVMFRKAPIKGNEDILGALSLVLYTLILIPLVKYVLVVLWANDDGEGGTFALYSLICRNAKVSLLPNQLRSDARISSFRLKVPSPELERSLKIKERLETSVTLKKILLLFVLAGISMVMANGVVTPAMSVLSSLNGLKVGVDAIKQDEVVMISVACLVILFSVQKYGTSKVGLAVGPALFIWFCSLAGIGIFNLVKYDSSVLRAFNPIHIYYFFARNSTKAWYSLGGCLLCATGSEAMFADLCYFSVQSVQLTFVFLVLPCLLLGYLGQAAYLMENHADAG…
7	121	Dicotyledons	Fabales	Soybean	Glycine max	19	GmHAK19	II:c	>Gmax_v1.1|Glyma01g03850|Glyma01g03850.1	MRLTNTHAMDLEGGTTRRNSVKRESWRTVVTLAYQSLGVVYGDLSISPLYVFRSTFAEDIKHTESNEEVFGVLSLVFWTITLVPLLKYVFVVLKADDNGEGGTFALYSLLCRHARVSSLPNCQVADEELSEYRKDSRGAAPESSFAARLRSTFEKHKVLQRVLLVLALIGTCMVIGDGIFTPAISVFSAVSGLELSMSKEKHAYVEVPAACIILIGLFALQHYGTHRVGFLFAPVIITWLFCLSTIGIYNIFYWNPHVYKALSPYYAFQLLRKTQKGGWMALGGILLCITGSEAMFADLGHFTQLSIKIAFTSVVYPSLIFAYMGQAAYLSKHHNIEQDYHFGFYESVPEKLRWPVLVIAILAAVVGSQAIITGTFSIIKQCSALSCFPRVKVIHTSSK…
7	122	Dicotyledons	Fabales	Soybean	Glycine max	20	GmHAK20	II:a	>Gmax_v1.1|Glyma19g28110|Glyma19g28110.1	MEPESGTSTSRNPSQLSWVNLSRNLLLAYQSFGVVYGDLSTSPLYVFTSTFRGKLQNHHDEETIFGTFSLIFWTLTLIPLLKYVFILLGADDNGEGGTFALYSLLCRHAKFNLLPNQQAADEELSSYKYGPSSQAVASSPLKRFLEKHKRLRTALLIVVLFGACMVVGDGVLTPAISVLASVSGLKVTEKKLTDDELVLLACVILVGLFALQHCGTHKVAFMFAPIVIIWLVSIFSIGLYNTIYWNPKIVRAISPYYIIKFFSKTGKEGWVSLGGILLCITGTEAMFADLGHFTALSIRLAFAFVIYPCLVVQYMGQAAFLSKNLGSVANSFYDSIPDPVFWPVFVIATLAAIVGSQAVITATFSIIKQCHALGCFPRVKVVHTSKHIYGQIYIPEINW…
7	123	Dicotyledons	Fabales	Soybean	Glycine max	21	GmHAK21	I:a	>Gmax_v1.1|Glyma19g45260|Glyma19g45260.1	MSGEADRTSIEEEMDTGKETAEKNLKLKDRKVSWAKLRRVDSLNLEAGRVSTVAHNPYQMGWRTTLILAFQSIGVVYGDIGTSPLYVYASTFTKKINNNDDILGVLSLIIYTIVLIPLLKYVFIVLWANDNGNGGAFALYSLICRHIKMSLIPNQEPEDRELSNYKLETPSTEFKRAQKLKQKLEGSHVARVVLILLAIVGTSMVIGDGILTPSISVLSAVSGISTSLGQDAVVGITIAILAVLFYVQRFGTDKVGFAFAPIILVWFLFIGGIGLYNLFKYDIGVLRAFNPKYIYDYFKRNGKEGWISLGGVFLCITGSEAMFADLGHFNVRSIQISFSCITFPAIVAAYIGQAAFLRKFPEKVANTFYDSIPDPLYWPTFVVAVAAAIIASQAMISGA…
7	124	Dicotyledons	Fabales	Soybean	Glycine max	22	GmHAK22	II:c	>Gmax_v1.1|Glyma19g01400|Glyma19g01400.1	MDLESVIHRNTIKEESWKTVLTLAYQSLGVVYGDLSTSPLYVYKSAFAEDIQHSDTNEEIYGVLSFVFWTLTLIPLLKYVFIVLRADDNGEGGTFALYSLLCRHARVSLLPNTQLADEDLTEYTMDNGTVPVDKKNVGLGLKNLLEKHRVLQRVLLVLALIGTCMVIGDGVLTPAISVFSAVSGLELSMSKEQHRYVEVPVACVILIFLFALQHYGTHRVGSLFAPVVLTWLLCISAIGVYNIFHWNPHVYEALSPYYMFKFLKKTQKGGWMSLGGILLCITGSEAMYADLGHFSQLSIKIAFTFLVYPSLILAYMGQAAYLSRHHSLESDYRIGFYVSVPVKLRWPVLAIAILQAVVGSQAVITGTFSIIKQCSAMGCFPKVKIIHTSSKMHGQIYIP…
7	125	Dicotyledons	Fabales	Soybean	Glycine max	23	GmHAK23	III	>Gmax_v1.1|Glyma15g17080|Glyma15g17080.3	MASTGFDEDGDTRGGMWVLEQKIDQPMDEEAERLKNMYREKKFSTLLLLRLAYQSLGVVYGDLGTSPLYVFYNTFPQRINNQEDVIGALSLIIYSLTLVPLLKYVLIVLRANDNGQGGTLALYSLLCRHANIRTIPNQHRTDEELTTYSRSTIREKSFAAKTKRWLEETPYMKNIILMLALVGTCMVIGDGILTPAISVLSAVGGIKVNHADLSNEVVVLVAVVILVGLFSMQHYGTDKVGWLFAPIVLLWFLLIGGIGIFNICKYGSSVLKAFSPLYIYRYLQREGKDGWLSLGGILLSITGTEALFADLAHFPVSSVQIAFTLLVFPCLLLAYSGQAAYLMHNLDHSEDAFYRSIPDKIYWPVFVVATLAAIVASQATISATFSIIKQANAHGCFPR…
7	126	Dicotyledons	Fabales	Soybean	Glycine max	24	GmHAK24	V	>Gmax_v1.1|Glyma15g05880|Glyma15g05880.1	MAEEINGGTSMDSTESRWVIQDDDEDASDLENFDADLRLGRHGGVVDSEEEEDNAEQRLIRTGPRIDSFDVEALEVPGAHRSDYEDISVGKKIVLAFQTLGVVFGDVGTSPLYTFSVMFRKAPINGNEDILGALSLVLYTLILFPLLKYVLVVLWANDDGEGGTFALYSLICRHAKVSLLPNQLPSDARISSFRLKVPSPELERSLKIKERLENSLALKKTLLILVLAGTSMVIANGVVTPAMSVMSSVGGLKVGVDAIKKDEVVMISVACLIILFSVQKYGTSKMGLAVGPALFLWFCSLAGIGIYNLVKYDNSVLRAFNPIHIYYFFKRNSTNAWYSLGGCLLSATGSEAMFADLCYFSVRSVQLSFVFLVLPCLLLGYLGQAAYLMENHADAGQAF…
7	127	Dicotyledons	Fabales	Soybean	Glycine max	25	GmHAK25	I:a	>Gmax_v1.1|Glyma03g42480|Glyma03g42480.2	MSGEADRTSIEEEVDTGKETAEKNLMKPKDPKVPWAKLRRVDSLNLEAGRVSMVAHDPYQMDWRTTLSLAFQSIGVVYGDIGTSPLYVYASTFTKKINNTDDILGVLSLIIYSIVLIPLLKYVFIVLWANDNGNGGAIALYSLIFRHIKMSLIPNQQPEDRELSNYKLETPSTEFKRAQKLKQKLEDSHVARIVLLLLAIMGTSMVIGEGILTPSISVLSAVSGISTSLGQDAAVGITIAILAVLFYVQRFGTDKVGFSFAPIILVWFLFIGGIGLYNLFKYDIGVLRAFNPKYIYDYFKRNGKEGWLSLGGVFLCITGSQAMFADLGHFNVRSIQISFSCITCPAIVVAYIGQAAFLRKFPEKVANTFYDSVPDPLYWPTFVVAFAAAIIASQAMISG…
7	128	Dicotyledons	Fabales	Soybean	Glycine max	26	GmHAK26	II:c	>Gmax_v1.1|Glyma09g05830|Glyma09g05830.1	MASTGFDEDGDNRGGMWVLEQKIDQPMDEEAERLKNTYREKKLSTLLLLRLAYQSLGVVYGDLGTSPLYVFYNTFPQQIDNQEDVIGALSLIIYSLTLVPLLKYVLIVLRANDNGQGGTLALYSLLCRHANIRTIPNQHHTDEELTTYSRSTIREKSFAAKTKRWLEETPYMKNIILMLALVGTCMVIGDGILTPAISVLSAVGGIKVNHADLSNGVVVLVAVVILVGLFSVQHYGTDRVGWLFAPIVLLWFLLIGGIGIFNICKYGSSVLKAFSPLYIYRYLQREGKDGWLSLGGILLSITGTEALFADLAHFPVSSVQIAFTLLVFPCLLLAYSGQAAYLMHNLDHSKDAFYRSIPDKIYWPVFVVATLAAIVASQATISATFSIIKQANAHGCFPR…
7	129	Dicotyledons	Fabales	Soybean	Glycine max	27	GmHAK27	I:b	>Gmax_v1.1|Glyma10g02470|Glyma10g02470.2	MTEVEVLKEIKRKNRKKLSKDVFNCFCRLDGSCDSELIKVGYSFAPIICVWFAFIGGIGVYNFIKYDPTVVKAINLKNIVDYFRRNKKDALISLGGVVLAITGTEALFADAGHFTVRFIQISMCSVIYPALILAYTGQASFLRKNNELLTYSAQPIELNPFDPPIIVQDSQSYPLYWPMFVIAIMASIIASKAMIFGTFSIIQQSLALGCFPFYVPEINFIFMIACVAVTAGLKSTTKIVKAYGIAVVFVMTLTSALLVLIMIMIWKSHILFVISYVLIIGSVELIYLSSYYYELDHKISPQKLKEIVTGRNLVRMHGFPPIFKHYVTNIPALHSVVVFVSIKSLPISKIPVEERFLFRQVEHEEINQEPFEHLLVKRLKEFIGCGFLASQRVIEDGKT…
7	130	Dicotyledons	Fabales	Soybean	Glycine max	28	GmHAK28	I:a	>Gmax_v1.1|Glyma07g04750|Glyma07g04750.1	MSVEADSLGMEGDNDTWKETPKNHLMKERTDSLNLEAGRVSMTSTHFSKLDWRTTLSLAFQSIGIVYGDIGTSPLYVFSGIFTNGIHHNEDILGVLSLIIYTIVIIPMIKYVFIVLHANDHGNGGAFALYSLICRHAKVSLIPNQQPEDKKLSHYRLETPSHNLNRAQKLKQKLENSYFARVVLVLVTMLGTSMVIGDGIFTPSISVLSAVSGISTSLGQEVVVGISIAILIALFSLQRFGTDKVGSSFAPILLVWFSFIAGIGIYNLFKHDIGVLRAFNPKYIFDFFKRNGKQGWLSFGGVLLCITGSEAMFADLGHFSVRAIQISFSFVVFPSILIAYIGQAAYLRKFPEKVSNTFYASIPDHLYWPTFVVAVAAAIIASQAMISGAFSVISQAQSL…
7	131	Dicotyledons	Fabales	Soybean	Glycine max	29	GmHAK29	II:a	>Gmax_v1.1|Glyma16g26470|Glyma16g26470.1	MELESGVSASQKNPSQLSWVNLSKDLLLAYQSFGVVYGDLSTSPLYVYTSTLSGKLQSHLNEEVIFGIFSLIFWTLTLIPLLKYVVIILNADDNGEGGTFALYSLLCRHANISLLPNQQAADEEMSCYKNGLSPEAAESSSLKRFLENHRSLKTALLVVVLLGACMVIGDGVFSPAISILAAVSGVRVTKTKFTDVEVVLIACVILVGLFALQHYGTHKVAFVFAPVVIIWLAAIFSIGLYNIIYWNPKIFHAISPLYLIKFFIKNAKEGWISLGGMLLCITGTEAMFADIGHFTTLSIRLAFAFVIYPCLVVQYMGQAAFLSKNLNSVHNSFYDSIPEPILWPVFVIATLAAIVGSQAVITATFSIIKQCHVLGCFPRVKIVHTSKHMFGQIYIPEIN…
7	132	Dicotyledons	Fabales	Soybean	Glycine max	30	GmHAK30	II:a	>Gmax_v1.1|Glyma16g05060|Glyma16g05060.1	MEPESGTSTSRNPSQLSWVNLSRNLLLAYQSFGVVYGDLSTSPLYVFTSTFKGKLQNHHDEETIFGTFSLIFWTLTLIPLLKYVFILLSADDNGEGGTFALYSLLCRHAKFNLLPNQQAADEELSSYKYGPSSQAIASSPLKRFLEKHKRLRTALLVVVLFGACMVIGDGVLTPAISVLASVSGLKVTEKKLTDGELVLLACVILVGLFALQHCGTHKVAVMFAPIVIIWLVSIFSIGVYNTIHWNPKIVRAISPYYIIKFFSRTGKEGWVSLGGILLCITGTEAMFADLGHFTASSIRLAFAFVIYPCLVVQYMGQAAFLSKNLDSVDNGFYDSIPDPVFWPVFIIATLAAIVGSQAVITATFSIIKQCHALGCFPRVKVVHTSKHIYGQIYIPEINW…
7	133	Dicotyledons	Fabales	Soybean	Glycine max	31	GmHAK31	II:b	>Gmax_v1.1|Glyma18g06790|Glyma18g06790.1	VTFALYSLLCRNGRLSILPNQQSIDEKLSTYATEDSADTWQCSVVKLFFEKHPGIRKGLLIFVLLGTCMAIGDGVISPLLKYKYEIMTYDLIVSTGVDIFLDLYVLKVKISELHDNYVIMVSCVILVGLFSIQHHGTHRVAFLFAPVVAIWLLCISSIGIYNIFHWNPKIYRALCPIYMVKFIKTIGIEAWLSLGGVIAFTCLVYPCLILAYMGEAAFLSRHHEDIRRKAVFWPVSTVATFEAILRSQAVISATFSIISQCHALNCFPSVKIIHTSTRIYGKIYIPEVNWILMCFCLAITIGLRDTNVIGHAYGLAVITVMFVTTCLMTLVIVIVWKQGIIKAIACLLLFGSIELLYISACICKVPEGGWISLVLCFIFNCIMYTWNYGTMKKHQFDVE…
7	134	Dicotyledons	Fabales	Soybean	Glycine max	32	GmHAK32	II:c	>Gmax_v1.1|Glyma18g18810|Glyma18g18810.2	MAPERSLAFRLKSLLERHKVLQRILLVLALLGTCMVIGVGVLKPTISVFSAVSGLELSMSKEHHRYVEVPGACIILIGLFALQRYGTDKVGFLFAPIVCIWLFCISAIGIYNIFYWNPHVYQALSPYYVFQFLKKTRRGGWMALCGILLCITGSEAMFAGLGHFSQLSIKIAFTSLVYPSLILAYMGQAAYFSRHHDVEQEYHFGFYVSVPEKLRWPVLVIAILAAVVGSQSIITGTFSIIRQCSALSCFPRVKVVHTSSKIHGQVYIPEINWLLMLLCLAVTIGFRDTKLMGNASGLAVVSVMLVTSCLMSLVIVICWHKNVMLAIGFVLFFGTIEALFFSASVIKFFEGAWVPVALAFVFLSVMCVWHYGTLKKYEFDVQNKVSLSWLLSLGPTLGF…
8	135	Dicotyledons	Fabales	Bean	Phaseolus vulgaris	1	PhvHAK1	V	>Pvulgaris|Phvul.003G052800|Phvul.003G052800.1	MKGDRIEESSSTRLLGRSSSGGSSESRWVDGSEVNWDEVPVWSKHADGREGYGSIRRRLAKLPKRVDSFDVEAMEIAGTQADHSKVLSLLPTLALAFKTLGVVYGDMGTSPLYVFADVFSKVPIGSDEDVLGALSLVMYTIAVIPLAKYVFIVLKANDNGEGGTFALYSLICRYANVSLLPNRQQADEYISSFKLKLPTPELERALKIKDTLEKKTFLKNLILVLVLVGASMVIGDGILTPAISVMSAISGLEDQINGFGTGEVVGISIVVLIALFSIQQFGTSKVGFLFAPILALWFFCLGSIGVYNILKYDITVLRAFNPAYIYYFFKKNGKAAWSSLGGCVLCITGAEAMFADLGHFSVPSIQIAFTCVVFPCLLLAYMGQASFLMKNPSFYSNVF…
8	136	Dicotyledons	Fabales	Bean	Phaseolus vulgaris	2	PhvHAK2	II:c	>Pvulgaris|Phvul.003G052900|Phvul.003G052900.1	MDLERGILQNSSKGKESWKTVLTLAYQSLGVVYGEISTSPLYVYRNTFAEDIGHSETNEEIYGVLSLVFWTLTLVPLVKYVFIVLKADDNGEGGTFALYSLLCRHAKVGLLPNCQLADEELSEYKKHSCGVAAERSLASRLKSLLERHKVLQRILLVLALLGTSMVIGVGVLKPTISVFSAVSGLELSMSKEHHRYVEVPGACIILLGLFALQRYGTNRVGFLFAPIVCVWLFCISAIGVYNIFYWNPQVYKALSPYYVFQFLRKTRRGGWMALGGILLCITGSEAMFAGLGHFSQLSIKIAFTSLVYPSLILAYMGQAAYFSRHHDVEQEYHFGFYASVPEKLRWPVLVIAILAAVVGSQSIITGTFSIIRQCSALSCFPRVKVVHTSSKIHGQVYIP…
8	137	Dicotyledons	Fabales	Bean	Phaseolus vulgaris	3	PhvHAK3	III	>Pvulgaris|Phvul.009G241000|Phvul.009G241000.1	MASTEFDEDGDNRGGMWVLEQRIDQPMDEEAERLKNMYREKKFSTLLLLRLAYQSLGVVYGDLGTSPLYVFYNTFPHGVDNQEQVMGALSLIIYSLTLVPLLKYVLIVLRANDNGQGGTLALYSLLCRHANIRTIPNQHRTDEELTTYSRSTIREKSFAAKTKRWLEEQAYYKDIILILALVGTCMVIGDGILTPAISVLSAVGGIKVNHADLSNEVVVLVAVVILVGLFSMQHYGTDRVGWLFAPVVLLWFLLIGGIGIFNICKYDSSVLKAFSPVYIYRYLRRGGKDGWTSLGGILLSITGTEALFADLAHFPVSSVQIAFTLLVFPCLLLAYSGQAAYLMHNLDHSQDAFYRSIPDKIYWPVFVVATAAAIVASQATISATFSIIKQANAHGCFPR…
8	138	Dicotyledons	Fabales	Bean	Phaseolus vulgaris	4	PhvHAK4	II:c	>Pvulgaris|Phvul.009G142400|Phvul.009G142400.1	MDLESRKCWDTSKKDSWKTIMLLAYQSLGVVYGDLSISPLYVYTSTFAEDIEHSETNEEIFGALSFVFWTLTLVPLFKYVFVVLRADDNGEGGTFALYSLICRHAKVSLLPNRQHADEALSTYKMEEPPEKDTSRFKMVLEKYKGLHTVLLIVVLLGTCMVIGDGVLTPAISVFSAVSGLEVSMSKKHHQYAVIPITCFILVCLFALQHYGTHRVGFLFAPIVLAWLLCISTLGLYNIFKWNPHVYKALSPYYMFKFLKKTRISGWMSLGGILLCITGSEAMFADLGHFSYMAIQTAFTFLVYPALILAYMGQAAYLSHHHDSELQISFYVSVPESVRWPVLILAILASVVGSQAIISGTFSIINQSQSLGCFPRVKVVHTSDKIHGQVYIPEINWLLM…
8	139	Dicotyledons	Fabales	Bean	Phaseolus vulgaris	5	PhvHAK5	I:a	>Pvulgaris|Phvul.009G212900|Phvul.009G212900.1	MSGAEGEAYGKKMRREEEEEEVAAESGGRADAERKAKLKERKVSWSKLKRVDSLNLEAGRVSMVAQNSYEMGWRTTLCLAFQSIGVVYGDIGTSPLYVFSSIFTNGIIKHEDDILGVLSLIIYTITLLPFLKYVFIVLWANDNGNGGAFALYSLICRHMKMSLIPNEQPEDRELSNYRLETPSSQVKWVHKLKQKLEGSLVSRVGLLFLAIVGTSMVIGDGILTPSISVLSAVSGISKSLGQDAVVGITVAILVILFSAQRFGTDKVGIVFAPIILVWFFFIGGIGLYNLFKYDIRVLRAFYPKYIFDYFKRNGKDGWLSLGGVFLCITGSEALFADLGHFDVRSIQISFSCITYPTIVVAYIGQAAYLRKFPQNVANTLYACVPHPLYWPTFVVAVIA…
8	140	Dicotyledons	Fabales	Bean	Phaseolus vulgaris	6	PhvHAK6	I:a	>Pvulgaris|Phvul.009G262700|Phvul.009G262700.1	MSGAEAEGKKMTEEEAVAVAESGGTADAERNPKLKERKVSWAKLRRVDSLNLEAGRVSMVAHNPYKMGWRTTLSLAFQSIGVVYGDIGTSPLYVYSSTFNNGIKHEDDILGVLSLIIYTIFLIPLLKYVFIVLWANDNGNGGAFALYSLICRHIKMSMIPNEQPEDRELSNYKLETPSSEVKRAHKLKQKLEGSLVSRVVILFLAIMGTSMVIGDGILTPSISVLSAVSGISKSLGQNAVVGITVAILVILFSAQRFGTDKVGFAFAPIILVWFFFISGIGLYNLFKYDIKVLRAFYPKYIFDYFKRNGKDGWLSLGGVFLCITGSEAMFADLGHFNVRSIQISFSCITCPSIVVAYIGQAAYLRKFPQNVANTFYDCIPDPLYWPTFVVAVAAAIIAS…
8	141	Dicotyledons	Fabales	Bean	Phaseolus vulgaris	7	PhvHAK7	II:c	>Pvulgaris|Phvul.008G152200|Phvul.008G152200.1	MDLESVIYKNSVKDGSWKTVLILAYQSLGVVYGDLSTSPLYVYKSTFAEDIQHSETNEEIYGVLSFVFWTLTLVPLLKYVFIVLRADDNGEGGTFALYSLLCRHAQVGLLPNVQLADEELTEYTKDGTVPMDKKNVGLGLKSVLENRKVLQRVLLVLALIGTCMVIGDGVLTPAISVFSAVSGLELSMSKEQHRYVEVPVACVILIFLFALQHYGTHRVGFLFAPVVLTWLLCISCIGMYNILHWNPHVYEALSPYYMFKFLKKTQMGGWMSLGGILLCITGSEAMFADLGHFSQLSIKIAFTFVVYPSLILAYMGQAAYLSKHHAIESDYRIGFYVSVPEKIRWPVLAIAILQAVVGSQAIITGTFSIIKQCSAMGCFPKVKIIHTSSKVHGQIYIPE…
8	142	Dicotyledons	Fabales	Bean	Phaseolus vulgaris	8	PhvHAK8	II:b	>Pvulgaris|Phvul.008G259600|Phvul.008G259600.1	MNPSEQFVEHGMSEQNLKRTSCATVLTLAYQSLGIVYGDLSTSPLYVYKTTFSGKLRLKENDEEIFGVLSFIFWTFTLTALFKYVFIVMSADDSGEGGTFALYSLLCRHARLSILPNQQATDEKLSAYTTQDSKDTWLSSHLKLFFEKHQRFQKGLLIFVLLGTCMTIGDGVITPAISVFSAVSGVQVKIKELHDNYVVIISCVILVVLFSIQHHGTHRVAFMFAPVVAAWLLCISGIGIYNIFHWNRQIYRALSPFYMLKFLKATGIEGWMSLGGIVLSITGVEAMYAALGHFSALSIKVAFTCLVYPCLIFAYMGEAAFLSKHHHATQDSFYKAIPETVFWPVFIVATFAAIVGSQAVISATFSIVSQCCALNCFPPVKIVHTSSRIYGQIYVPEVN…
8	143	Dicotyledons	Fabales	Bean	Phaseolus vulgaris	9	PhvHAK9	II:c	>Pvulgaris|Phvul.004G018100|Phvul.004G018100.1	MDLESVIHRNTIKEESWKTVLTLAYQSLGVVYGDLSTSPLYVYKSAFAEDIQHSDTNEEIYGVLSFVFWTLTLIPLLKYVFIVLRADDNGEGGTFALYSLLCRHARVSLLPNTQLADEDLTEYTIDNGTVPINKKNVGLGLKNLLEKHRVLQRVLLVLALIGTCMVIGDGVLTPAISVFSAVSGLELSMSKEQHRYVEVPVACVILVFLFALQHYGTHRVGCLFAPVVLTWLLCISAIGIYNIFHWNPHVYQALSPYYMFKFLKKTQKGGWMSLGGILLCITGSEAMYADLGHFSQLSIKIAFTFLVYPSLILAYMGQAAYLSRHHSLESDYRIGFYVSVPVKLRWPVLAIAILQAVVGSQAVITGTFSIIKQCSALGCFPKVKIIHTSSKTHGQIYIP…
8	144	Dicotyledons	Fabales	Bean	Phaseolus vulgaris	10	PhvHAK10	II:a	>Pvulgaris|Phvul.001G099600|Phvul.001G099600.1	MEPESGTSTSRNPSPLSWVNLSRNLILAYQSFGVVYGDLSTSPLYVFTSAFRGKLLDHHDEETIFGTFSLIFWTLTLIPLLKYVFILLSADDNGEGGTFALYSLLCRHAKFNLLPNQQAADEELSSYKYGPSSQAAASSPLKRFLEKHKRLRTALLLVVLFGACMVVGDGVLTPAISVLASVSGLKVTEKKLTDGELVLLACVILVGLFALQHCGTHKVAFMFAPIVIIWLVSIFSVGLYNTIHWNPQIVRAISPYYIIKFFSKTGKEGWVSLGGILLCITGTEAMYADLGHFTASSIRLAFAFVIYPCLVVQYMGQAAFLSKNLNSIENSFYDSIPEPVFWPVFVIATLAAIVGSQAVITATFSIIKQCHALGCFPRVKVVHTSKHIYGQIYIPEINW…
8	145	Dicotyledons	Fabales	Bean	Phaseolus vulgaris	11	PhvHAK11	V	>Pvulgaris|Phvul.006G206600|Phvul.006G206600.1	MAEEINRGSSMESTESRWVIQDDDDDDDSDLENFVADLRFGRHPSVVDSEEEEDNAEQRLIRTGPRIDSFDVEALEVPGAHRSDYEDISLGKKIVLAFQTLGVVFGDVGTSPLYTFSVMFRKAPINGNEDILGALSLVLYTLILIPLLKYVLVVLLANDDGEGGTFALYSLICRHAKVSLLPNQLPSDARISSFRLKVPSPELERSLKIKERLENSLTLKKTLLILVLAGTSMVIANGVVTPAMSVLSSVGGLKVGVDVIQKDEVVMISVACLIILFSIQKYGTSKVGLAVGPALFLWFCSLAGIGIYNLVKYDNSVLRAFNPIHIYYFFQRNSTKAWYSLGGCLLSATGSEAMFADLCYFSVRSVQLSFVFLVLPCLLLGYLGQAAYLMENHADAGQV…
8	146	Dicotyledons	Fabales	Bean	Phaseolus vulgaris	12	PhvHAK12	II:a	>Pvulgaris|Phvul.002G294700|Phvul.002G294700.1	MSSDTIRERGASTGVERKFQYRQLLFLAYQSLGFLFGDLSLSPLYVYQSIFSERLKHVQNEDAIFGAFSLIFWTLSSISLLKYALIMLSADDNGEGGVVALYSQLCRSAKFCLLPNHQASDEELSTYYKPGSSNGSIPSSPLKRFIERHKNTKMALLIFVLLGACMAICVGALMPAISVLSSVEGLKIEAKITNKSMVSCISCVLLIGLFVMQHRGSYKVAFVFPPVIILWLLTIFMIGIFNIIKWNPRVYQALSPYYVYKFFRLTGKDGWTNLGGVFLCVTGTEAMFADLGYYRQTPIRVAFHCIIYPCLVLQYMGQAAFLSKNLSAVPISFYASIPDVLFWPVFVLSALAVIVASQAVIASTFSVVQQCHAFECFPRVKAIHSRRWIPGQTYIPEIN…
8	147	Dicotyledons	Fabales	Bean	Phaseolus vulgaris	13	PhvHAK13	V	>Pvulgaris|Phvul.002G208700|Phvul.002G208700.1	MANPKTKSPHSLGGEDDPESYESRWVFQEDEDASEIDDFDAADLRHQPMFDSEDEDNAEQRLVRTGPRIDSFDVEALEVPGAQRNDYEDVSVGKGILLAFQTLGVVFGDVGTSPLYTFSVMFRKAPINGNEDIIGALSLVLYTLILIPLLKYVLVVLWANDDGEGGTFALYSLICRNAKVSLLPNQLPSDARISGFRLKVPSPELERSLKIKERLETSLALKKILLLVVLAGISMVIANGVVTPAMSVLSSVNGLKVGVDAIKQDEVVMISVACLIALFSVQKYGTSKVGLAVGPALFIWFCSLAGIGIYNLVKYDSSVLRAFNPIHIYYFFARNSTKAWYSLGGCLLCATGSEAMFADLCYFPVRSVQLTFVFVVLPCLLLGYLGQAAYLMENHADAG…
8	148	Dicotyledons	Fabales	Bean	Phaseolus vulgaris	14	PhvHAK14	II:a	>Pvulgaris|Phvul.002G294400|Phvul.002G294400.1	MSSDASRERGASTVVERKFQCRTLLFLAYQSFGYLYGDLSLSPLYVYQSIFSGKLKHVQNEDAIFGAFSLIFWTLSIVSLLKYTVIILSADDNGQGGMVALYSQLCRNAKFCLLPNHQASDEELSTYLKLGSSNRCIPPSPLKRFIEKHKSTKMALLIFVLLGACMVICVGALMPALSVLSSIDGLEIEAKTTNKSVVSRISCVLLIGLFIMQHRGSYKVAFVFPPIIILWLLTIFMIGIYNVIKWNPRVYGALSPYYIYKFFRLTGKGGWVNLGGVFLCVTGTEAMFADLGYYRQTPIRVAFYCVIYPSLVLQYMGQAAFLSKNLSAVPVTFYASIPDVLFWPVFVVSALAVVVSSQAVIASTFSVVQQCHAFESFPRVKAVHSRRWIPGQTYIPEVN…
8	149	Dicotyledons	Fabales	Bean	Phaseolus vulgaris	15	PhvHAK15	III	>Pvulgaris|Phvul.002G191100|Phvul.002G191100.1	MSSRVDTDEDSDNNKGSMWDLDQKLDQPMDEEAGRLKNMYREKKFSALLLLRLSFQSLGVVYGDLGTSPLYVFYNTFPNGVKDQEDVIGALSLIIYSLTLVPLLKYVFVVLRANDNGQGGTFALYSLLCRHAKIKTIPNQHRTDEELTTYSRSTFHERSFASKTKRWLEEQESARSVILILVLVGTCMVIGDGILTPAISVLSAVGGIKVNQPRMSSGVVVLVAVVILVGFFSMQHYGTDKVSWLFAPIVLLWFLLIGSIGIFNIWKYGSSVLKAFSPVYIYRYFRKGGKEGWTSLGGIMLSITGTEALFADLAHFPVSAVQLAFTLVVFPCLLLAYSGQAAYLMSNLSHSQDAFYRSIPDRIYWPVFIVATLAAIVASQATITATFSIIKQALALGCF…
8	150	Dicotyledons	Fabales	Bean	Phaseolus vulgaris	16	PhvHAK16	II:c	>Pvulgaris|Phvul.002G072300|Phvul.002G072300.1	MDLEGRTCRYSAKRESWRTVLTLAYQSLGVVYGDLSISPLYVFRSTFAEDIKHTESNDEVFGVLSLVFWTITLVPLVKYVFVVLKADDNGEGGTFALYSLLCRHARVSSLPNCQVADEELSEYKKDSRGAAPDRSFALRLKTTFEKHKVLQRVLLILALIGTCMVIGDGILTPAISVFSAVSGLELSMSKETHTYVEVPASCIILIGLFALQHYGTHRVGFLFAPVIIVWLFCISAIGIYNIFHWNPHVYKALSPHYAIQLLRKTQKGGWMALGGILLCITGSEAMFADLGHFSQLSIKIAFTSVVYPSLILAYMGQAAYLSKHHNIEQDYHFGFYVSVPEKLRWPVLVIAILAAVVGSQAIITGTFSIIKQCSALSCFPRVKVIHTSSKIHGQIYIPE…
8	151	Dicotyledons	Fabales	Bean	Phaseolus vulgaris	17	PhvHAK17	IV	>Pvulgaris|Phvul.002G185300|Phvul.002G185300.1	MEIHVDHPSLNEVVVNVSGDSASDARRLHPTNHAFSPQQQRQQQQQKVQEGNQRRDSLVLAYKTLGVVFGGLVTSPLYVYPSMPLKHPTEDDYLGIYSIMFWTLTLIGVVKYANVAIRADDHGEGGTFALYSLLCRHVGIGILPSKHVGLNTTKDVQKSTLLARFFQTSLVARRLLLFVAMLGTCMLIGDGILTPAISVLSAMDGLRAPFPSVSKSLVEALSSVVLIVLFLLQKFGTSRVSFLFSPIMGAWTLSTPLVGIYSIIHHYPSIFKALSPHYIFHFFLRNGKSGWLLLGGTVLCITGSEAMFADLGHFNQKSIQLAFLFTIYPSLVLTYAGQTAYLIKHPNDHDDGFYKFIPTSVYWPIFIISTSAAVVASQSLISATFSVIKQSVVLDYFPR…
8	152	Dicotyledons	Fabales	Bean	Phaseolus vulgaris	18	PhvHAK18	II:c	>Pvulgaris|Phvul.002G331700|Phvul.002G331700.1	MDSHHFDQDKKKTWKQTFLLSFQIVGIVYGQLSTAPLYVFGTMRGIDLAADEEVVYELFSFIFWTLTIISLVKYSSIVLKADDEGEGGIVALYSLLCRNAKVGLLPCDRSANEVMLYEEKSSSKIKADSRARRAIEKHKICHYLLLFLALFGSCMTIGDAVLTPALSVYSASTGVQRSLTDILKNIFASSQHTQDSVSNALKTYVPVPSACVILVGLFMLQHCGTRKIGIMFGPIITAWLLFVAAVGTYNIFKWDVKIIYKISPIYIYKFITKIDIPRWRLLGSVILCVAGSEAMFADLGHFSKKSIKITFICLIYPLLLLCYAGQAAYISKNLTAPDFNHLSQSMPDRCKHLYIVLSLLSSAVGSQATITACFSIINQCLALNCFPRVKVIHTSKTIN…
9	153	Dicotyledons	Rosales	Peach	Prunus persica	1	PrpHAK1	II:c	ppa001638m	MDLERVKCWDTSKKDSWKNILLLAYQSLGVVYGDLSISPLYVYKSAFAEDIQHSETNEEIYGVLSFVFWTLTLVPLFKYVFIVLRADDNGEGGTFALYSLICRHAKVSLLPNRQLADEALSTYKLEHPPEKEKSSRLKVVLEKCKALHTALLILVLLGTCMVIGDGVLTPAISVFSAVSGLELSMSKEHHQYAVVPITCFILLCLFALQHYGTHRVGFFFAPVVLAWLLCISALGLYNIFQWNRYIYQALSPYYMFKFLRKTRISGWMSLGGILLCITGSEAMFADLGHFSYSAIQVAFTFLVYPALILAYMGQAAYLSQHHHTSHRISFYVSVPESVRWPVLVLAILASVVGSQAIISGTFSIINQSQSLGCFPRVKVVHTSDKVHGQIYIPEINWML…
9	154	Dicotyledons	Rosales	Peach	Prunus persica	2	PrpHAK2	III	ppa001603m	MASRVEIDEDSDTNKGSMWVLDQKLDQPMDEEAGRLRNMYREKKFSALLLMRLAFQSLGVVFGDLGTSPLYVFYNTFPHGISDPEDVVGALSLIIYSLTLIPLLKYVFVVCRANDSGQGGTFALYSLLCRHANVKTIPNQHRTDEELTTYSRSTFHEQSYAAKTKKWLEGHASRKNALLLLVLVGTCMVIGDGILTPAISVLSAAGGIKVSSPGMKNDYVILVAVVILVGLFSVQHYGTDKVGWLFAPIVLLWFLLIGGIGIFNIWKHDSSVLRAFSPVYIYRYFKRNGRDGWTSLGGIMLSITGTEALFADLAHFPVSAVQIAFTTVVFPCLLLAYSGQAAYLMKNHDNKTVLQAFYLSIPEKIYWPVFIVATLAAVVASQATISATFSIIKQALALG…
9	155	Dicotyledons	Rosales	Peach	Prunus persica	3	PrpHAK3	V	ppa001373m	MKEEDGIVERSERLVVRSGSGGGSDSRWVDGSEVDSESPPFSMLSENIGREGYGSLRRRLAKKPKRVDSFDVEAMEIAGGGSHHSKDASVWSTLALAFQTLGVVYGDMGTSPLYVFADVFSRVKIESDVDVLGALSIVIYTIALIPLAKYVFVVLKANDNGEGGTFALYSLICRYAKVNLLPNRQPADEHISSFRLKLPTPELKRALRIKETLERRSFLKTLLLLFVLMGTSMVIGDGILTPAISVMSAVSGLQGEVPGFGTTAVVVVSIIILVVLFNIQRFGTGKVGVMFSPILALWFFSLGSIGIYNLVKYDITVLKAFNPAYIYFFFKKNDKEAWLALGGCVLCITGAEAMFADLGHFSVRAIQIAFSFVVFPCLLLAYLGQAAYLMKYPDSASRI…
9	156	Dicotyledons	Rosales	Peach	Prunus persica	4	PrpHAK4	II:a	ppa001652m	MEPESGISTPSRNPPPQLSWVNLSRNLILAYQSLGVVYGDLSTSPLYVYTSTFIGKLQNHNNEEVIFGAFSLIFWTLTLIPLLKYVFILLSADDNGEGGTFALYSLLCRHAKFSLLPNQQAADEELTAYKYGPSSQVVASSPLKRFLEKHKRLRTALLVVVLLGACMVIGDGVLTPAISVLSSVSGLQVTEEKLTDGELLLLACVILVGLFALQHCGTHRVAFLFAPIVIIWLISIFAIGLYNTIHWNPAIVRALSPHYIVKFFRETGKDGWISLGGILLSITGTEAMFADLGHFTALSIRLAFAFIIYPCLVVQYMGQAAFLSKHPNCIRYSFYDSIPEPVFWPVFVVATLATIVGSQAVITATFSIIKQCHALGCFPRVKVVHTSKHIYGQIYIPEI…
9	157	Dicotyledons	Rosales	Peach	Prunus persica	5	PrpHAK5	III	ppa001626m	MARRMSADENTDNKGSVWALDQQLDQPMDEEAKRLRNMYKEKKYSTLMLLQLAFQSLGVVYGDLGTSPLYVFYNTFPDGIGDPEDLIGALSVIIYSLTLIPLLKYVFIVCRANDNGQGGTFALYSLLCRHAKIKAIPNQDQTDEALTTYSRSTFGEQSFAARTKRWLEGHALMQSTLLILVLVGSCMVIGDGILTPAISVLSAVGGINVGHPKISNGVVVLVAVVILVLLFTMQRHGTDKVGWLFAPVVLLWFLVIGGIGMFNIWKYDRSILKAFSPVYVYRFFKRGGKDGWTSLGGIMLSITGTEALFADLSHFPVPSIQIAFTSVVFPCLLLAYCGQAAYLMKNSNNVIGAFYHSIPDSIYWPVFIVATAAAVVASQATITATFSLIKQALALGCFP…
9	158	Dicotyledons	Rosales	Peach	Prunus persica	6	PrpHAK6	II:c	ppa001724m	MDPETGIYKNHVKKESWRTILTLAYQSLGVVYGDLSTSPLYVYKSTFAEDIEHSETNEEIFGVLSFVFWTLTLVPLLKYVFIVLKADDNGEGGTFALYSLLCRHARVSSLPNCQLADEELSDYKKENTGSSLQSSFGTRLKSTLERHRVLQRFLLVLALIGTCMVIGDGVLTPSISVFSAVSGLEFSMSEKHHKYVEVPIACIILIVLFALQHYGTHRVGFLFAPIVLTWLLCISAIGLYNILHFNPSVYKALSPHYMYKFLKKTQKGGWMSLGGILLCITGSEAMFADLGHFSQLSIKIAFTSLVYPALVLAYMGQAAYISSHHTVGSNPKIGFYVSVPEKLRWPVLVIAVLAAIVGSQAIITGTFSIIKQCSSLDCFPRVKIVHTSSKIHGQIYIPE…
9	159	Dicotyledons	Rosales	Peach	Prunus persica	7	PrpHAK7	V	ppa001335m	MAEEEGLERGEINGGLASMDSIDSRWVFQDEDDSEVDDEEAEDDVRHRTVVDSEDDEDDDNAEQRLIRTGPRIDSFDVEALEVPGALRNEYEDFSLGRKIIIAFQTLGVVFGDVGTSPLYAFSVMFKKAPINGNEDVIGAMSLVLYTLILIPLLKYVLVVLWANDDGEGGTFALYSLICRHAKVSLLPNQLPSDARISSFRLKVPSPELERSLKIKERLEASLTLKKLLLTLVLAGTAMVIADGVVTPAMSVVSAVSGLKIGVDAIKQDQVVMISVTFLVILFSVQKFGTSKVGLAVGPALFIWFCSLGGIGIYNLVKYDSSVLKAFNPVHIYYFFKRNSTKAWYSLGGCLLCATGSEAMFADLCYFSVRSVQLTFVLLVLPCLMLGYLGQAAYLMENP…
9	160	Dicotyledons	Rosales	Peach	Prunus persica	8	PrpHAK8	III	ppa016662m	MTENEDPEKKGGVWALDQQLDQPMDEEANKFSNMSEDKKCSSITVLQLAFQSLGVVYGDLGTSPLYVFYNTFPYGIDEPDDLLGALSVVIYSLTLIALVKYVLIVCRANDNGQGGTFALYSLLCRHAKIKTVPNQDQSDEELTTYSRSTFGEQSFAASTKRWLEGHALIQNVLLILVLIGSCMVIGDGILTPAISVLSAVGGINCCRFHTSNDIVVVVAVVILVILFIMQQFGTQKFGWLFAPIVLLWFLLIGGIGIFNIWKYDTSILRAFSPVYVIAFFRKGGTHGWASLGGIMLCINGTETLFADVSHFPVLSVQIAFTLVAFPCLLLAYSGQAAYLMKYPHHVFGAFYYSIPESIYWPVFSVATAAAIVASQATITATFSLIKQALALGCFPRVKV…
9	161	Dicotyledons	Rosales	Peach	Prunus persica	9	PrpHAK9	I:a	ppa016701m	MAEKVVSLREGEAELTNQHLKERKASWAKLRRVDSLSLEAGRVSTTRSHGSQVSWQRTLSLAFQSIGIVYGDIGTSPLYVFSSTFTDGIDNVDDILGVLSLIIYTIALVPMLKYVFIVLWANDNGDGGTFALYSLMCRYAKVSLIPNNQPEDRELSNYKLETPSNELKRAQTIKKKLENSKMAQYVLFLVTIMGTSMVIGDGVLTPCISVLSAVSGIKSLGTDAVVGISIVILIVLFAAQRFGTDKVGYTFAPIILLWFLLISGIGLYNLFKHDVGVLRAFNPKYIIDFFKRNGKKGWVSLGGVFLCITGTEAMFADLGHFNVKAIQISFSCITFPALITAYSGQAAFLRKFPGKVEHTFYDSIPDPLYWPTFVIAVAAAIIASQAMISGAFSIISQSL…
9	162	Dicotyledons	Rosales	Peach	Prunus persica	10	PrpHAK10	II:b	ppa025447m	MNPSEELMEQGISPRSMQKVSYTTVLTLAYQSLGVVYGDLSTSPLYVYKTTFSGKLSLQEDDEEIFGVLSFIFWTFTLIALCKYVFIVMLADDNGEGGTFALYSLLCRHARLSILPNQEITDEKLSEYVTEGTTDTWQSSALKLFFNKHPGFRKGLLVFVLFGTCMAIGDGVLTPAISVLSAVSGIKLKFTELHDNYVVIISCVLLVGLFSLQHHGTHRVAFMFAPIVTAWLLCISGIGIYNIFHWNRRIFHALSPVYMLKFLRSTGVEGWVSLAGVVLSITGVEAMFANLGHFSSLSIKMAFTLLVYPSLVISYMGEAAFLSKHHEDIQRSFYKAIPEAVFWPVFIIATFASVVGSQAVISATFSIISQCCALKCFPRVKIVHTSSKIYGQIYIPEVN…
9	163	Dicotyledons	Rosales	Peach	Prunus persica	11	PrpHAK11	II:c	ppa003114m	MVIGDGVLTPAISVFSAVSGLELSMSKEQHRYVEVPVACVILIFLFALQHYGTHRVGFLFAPVVITWLFCISSIGVYNIFRWNRQVYQALSPYYMYKFLKKTQKGGWMSLGGILLCMTGSEAMFADLGHFSQLSIKIAFTFVVYPSLILAYMGQAAYLSEHHVIQSDYRIGFYESVPEKIRWPVLAIAILAAVVGSQAIITGTFSISNNIIHTSSKIHGQIYIPEINWTLMLLCLAVTIGFRDTKSMGNASGLAVITVMLVTTCLMSLVIVLCWHKSIFLAICFILFFGSIEALYFSASLIKFREGAWVPIALSFIFLVVMYVWHYGTFKKYEFDVQNKVSINWLLSLGPTLGIVRVRGIGLIHTELVSGIPAIFSHFVTNLPAFHQVVVFLCIKSVPV…
9	164	Dicotyledons	Rosales	Peach	Prunus persica	12	PrpHAK12	I:b	ppa001648m	MPDEEVILENATDHQEVPDHHQNQELKSKKLSWQKLRRYDSLDLESRSFTAHHGHASKGAEWSVILHLAFQSIGIVYGDIGTSPLYVYSSTFTKGINHDDDILGVLSLILYTLTLIPLIKYVFVVLRANDNGDGGTFALYSLLCRYAKVGLTPSQQAEDRDVSNFELELPSKRLKRASRLKSKLENSPFAKVFLLFATMLGTSMVIGDGVLTPCISVLSAVGGIKEATSAMTEDRIVWISIAILICLFMVQRFGTDKVGYTFAPIICVWFTLIGGIGVYNFIKFDPTVVKALNPQYIVDYFRRNKKDAWISLGGIVLAITGTEALFADVGHFTVRSIQISMCAVTYPALILAYTGQASFLRNHHHLVYETFFKSIPGPLYWPMFVVAVLASIIASQAMI…
9	165	Dicotyledons	Rosales	Peach	Prunus persica	13	PrpHAK13	I:a	ppa015062m	MGEKAETDDKMRRTDSLNLEAGKVSTAHDHGSKLSWKRTMSLAIQSVGVVYGDIGTSPLYVFSSTFPKGINHKDDILGVLSLIIYTILLVPLVKYVLVVLWANDNGEGGTFALYSLICRYAKVSLIPNTQPEDRELSNYKLELPSNELKRAQAIKKKLERTKSAKYALFVITIMGTSMVIGDGILTPCISVLSAVSGIKSLGTDAVVGISVVILVLLFAVQQFGTDKVGFTFGPIILLWFVFISCIGLYNLITYDVTVLRAFNPAYIYHYFHRNGKEAWISLGGVVLCITGTEAMFADLGHFSVRAIQISFTCFTFPTILFAYFGQAAYLTKYPEKVTDTFYASIPSPMYWPTFVVAVLAAIIASQALITGTFSIISQSLSMGCFPRVKIVHTSAKNEG…
9	166	Dicotyledons	Rosales	Peach	Prunus persica	14	PrpHAK14	II:c	ppa022818m	MDPQLGSANQFKETWKHTLLLSFQSLGVIYGQLSTAPLYVFGTMNAEDIKSEETVYELFSCIFWTINIISLLKYAFIVLRADDNGEGGTFALYSLLCRHAKVGLLPNDTSANEVMHYETGSPFKIKVESRARRAIEKHKSSHYLMLFLALFGSCMTIGVGVLTPALSVYSVSSGVQRSMSDMAHLYVPVPTASAILVCLFTLQHYGTHKIGFIFAPIIVIWLIFIGGGGIYNIFHWNKQIIHAVSPMYMYRFVKNIEIKSWRSLGSIVLCVAGSEAMFADLGHFRKKSIKITFVCLIYPVLVLCYAGQAAYISKNLHAADFNHLSESIPPLSLLASVVGSQATITASFSIINQCLALGCFPRVKVIHTSDKIHGQVYIPDINWLLMVLSLAVTIGFHDI…
9	167	Dicotyledons	Rosales	Peach	Prunus persica	15	PrpHAK15	II:b	ppa002879m	MGLLNTVHPAHERISSYCSEIPTKDTRMSLLIKEFFEKHKSSRIVLLLVVFLGTGMIIGDGILTPTMSVLSAVYGIRIKAPDLHENYTVFIACIILVGLFALQHYGTHKVGFLFAPIMLIWLLCISGVGMYNIFCWNPRVIGALSPYYIYNFFRKTGRIGWSSLGGVVLCLTGTEAMFADLGHFSKLSIRIAFTGLVYPCLVLAYMGEAAYLSKNKMDISSSFYKAIPEVMFWPVLIIATLASVVGSQAIISATFSIVSQCRALRCFPRVKIKHTSNQIHGQIYIPEVNWMLMISCLAVVIGFRDTRMIGNAYGLAGVTVMFITTCLMFLIISTVWKKNVLLAVLFFVVFGSLELLYISACLGKVHHGGWLPLLFALVIVSLMSIWNYGTMKKDAFELE…
10	168	Dicotyledons	Rosales	Strawberry	Fragaria vesca	1	FvHAK1	III	mrna20008.1-v1.0-hybrid mrna20008...	MAAEEDPDKKGGVWVLDQQLDQPIDVEAKKKYSSTMLLQLAFQSLGVVYGDLGTSPLYVFDNAFPDGIVDKEDVVGALSVIIWSLTFVPLLKYVFIVCRANDNGQGGTFALYSLLCRHAKIKSVPNQDQTDEEVTTFSRNTFGEKSFAARTKRGLEGHAFLHNMLLILVLIGSCMVIGDGILTPAISAYCGQAAYLMKNSNNVAFAFYQSVPDSIYWPVYVIAIAAAIVASQSTITATFSLIKQALALGCFPRVKVIYTSRHRHQIYIPDVNWILMILCISVTAGFHQQTQIGNAAGTAVVIVMLVTTFLMILVMILVWRVHWMLVLIFTSLSLLVEGPYLSAVLLKVDQGGWAPLVIATAFFVVMYVWNYGTVRRYDIEMHSKVSMAWIIGLGPSLGL…
10	169	Dicotyledons	Rosales	Strawberry	Fragaria vesca	2	FvHAK2	II:c	mrna00675.1-v1.0-hybrid mrna00675...	MEERDEIEEGSERVVSRSGSDLRWVDGSEVETEIVPNSDSGGREEGGYLRRRLVKKPKRADSFDVEAMEIAGTDAHRFKDSSIWGTLALAFQTLGVVYGDMGTSPLYVFTDVFGRVNIDSDVDILGALSLVIYAKVNMLPNQQPADEHISSFRLKLPTPELKRALRIKETLEKRSASKTLLLLFVLMGTSMIIGDGILTPAISVMSAVSGLQGEVPGFGTNAVVVVSILILIVLFGIQQFGTSKVGFMFSPILALWFLSLGSIGLYNVLKHDITVLRAFNPIYIYLFFKKHDEEAWYALGGCVLCITGAEVMFADLGHFSVRAIQIAFSFVVFPCLLFAYMGQAAYLMRFPHSAPRIFYDSFPESYGQTDSLFWPVIVIATLAALIASQAMISATFSCV…
10	170	Dicotyledons	Rosales	Strawberry	Fragaria vesca	3	FvHAK3	II:c	mrna21341.1-v1.0-hybrid mrna21341...	MDLEKAKCWDTSKKNSWKNTLLLAYQSLGVVYGDLSISPLYVYKSAFAEDIQHSDTNEEIYGVLSFVFWTLTLVPLVKYVFIVLRADDNGEGGTFALYSLICRHAKVSLLPNRQLADEAVSTYILEHPPEKEKSSWLKVVLEKSKTLHTALLVLVLLGTCMVIGDGVLTPAMSVFSAVSGLELSMSKEHHLYAVVPITCFILLCLFALQHYGTHRVGFFFAPVVVAWLLCISALGLYNIFHWNRHVYQALSPYYMFKFLRKTRISGWMSLGGILLCITGSEAMFADLGHFSYSAIQVAFTFLVYPALILAYMGQAAYLSQHHHSNHQISFYVSVPHIVRWPVLILAILASVVGSQAIISGTFSIINQSQSLGCFPRVKVVHTSDKIHGQIYIPEINWML…
10	171	Dicotyledons	Rosales	Strawberry	Fragaria vesca	4	FvHAK4	II:a	mrna01406.1-v1.0-hybrid mrna01406...	MSSVLARTGRRRQRYENNLRLVSGCIPYRITEDMNDEDHSSSSHIENKIQVLMVSSPDRDDLVFPKGGWEDDETVLEAASREAFEEAGVKGTLRETPLGVWEFRSKSRQKMCSLEGGCKGYMFALQVTQELDTWPEQQNRAREWLSTKDAFRVCRYEWMRRALEQFLRVMASSSDTKDDDGAVGNNAVVVPADEVVVDHDQIMNQMTADLLGETSDDHEHTIGDLTEEPEPCSPRPAMTSTPSTLLRSPLSSSNVGIAKAVTVSDGPSRKSASEVSLSSDTHRAIPFPMEPDAATSTSRRPQLSWVNLSRNLLLAYQSLGVVYGDLSTSPLYVYTSTFLGKLQNHNNEEVIFGAFSLIFWTLTLLPLLKYVFILLSADDNGEGGTFALYSLLCRHAKFS…
10	172	Dicotyledons	Rosales	Strawberry	Fragaria vesca	5	FvHAK5	II:c	mrna28386.1-v1.0-hybrid mrna28386...	MDLEGVIRTRPNKKDSWKTVLTLAYQSLGVVYGDLSTSPLYVYKSTFAEDIHHSETNEEIYGVLSFVFWTLTLIPLVKYVFIVLRADDNGEGGTFALYSLLSRHARVSSLPNCQLADEELSEYHKDGIVASNSSFGSSLKSTLEKHKVLQKVLLVLALIGTCMVIGDGVLTPAISVFSAVSGLELSMSKEQHRYVEVPVACVILIFLFAIQHYGTHRVGFLFAPVVIVWLLCISSIGLYNIFHWNPHVYQALSPYYMYKFLKKTRRGGWMSLGGILLCITGSEAMFADLGHFSQLSIQIAFTFVVYPSLILAYMGQAAYLSKHHVIETDYRIGFYESVPEKIRWPVLAIAILAAVVGSQAIITGTFSIIKQCSALGCFPRVKIIHTSSKIHGQIYIPEI…
10	173	Dicotyledons	Rosales	Strawberry	Fragaria vesca	6	FvHAK6	III	mrna20009.1-v1.0-hybrid mrna20009...	MNLGGDISEENDTNKGSMWVLDQKLDQPMDEEAGRLRTMYRKNPEDVVGALSLIIYSLTLIPLIKYIFVVCRANDSGQGGTFALYSLLCRHAKIKTIPNQHRTDEELTTYSRSTFHEQSYAAKTKKWLEGHASRKNALLVLVLVGTCMVIGDGILTPAISVLSAAGGIKVNSPKMNNDYVILVAVVILVGLFSMQHYGTDKVGWLFAPIVLLWFLLIGGIGIFNIWKYDSSVLRAFSPVYIYRYFKRNGKEGWTSLGGIMLSITGTEALFADLAHFPVSAVQIAFTTVVFPCLLLAYSGQAAFLVVHHDNDETVTQAFYRSIPEKIYWPVFVVATLAAIVASQATISATFSIIKQAHALGCFPRVKVVHTSKKFLGQIYIPDINWILMILCIAVTAGFK…
10	174	Dicotyledons	Rosales	Strawberry	Fragaria vesca	7	FvHAK7	IV	mrna27457.1-v1.0-hybrid mrna27457...	MGDEEMNGGAGSMDSMESRWVFQDEDESEIDEDEDEDQHRTTVMDSEDDEDDDNAEQRLIRTGPRIDSFDVEALEVPGALRNEYEDYSLGRKLVIAFQTLGVVFGDVGTSPLYTFSVMFSKAPINGNEDVLGALSLVLYTLILIPLLKYVLVVLWANDDGEGGTFALYSLICRHAKVSLLPNQLPSDARISSFRLKVPSPELERSLKIKERLEASLTLKKLLLMLVLAGTSMVIADGVVTPAMSVVSAVGGLKVGVEAINQDQVVMISVAFLIILFSVQKFGTSKVGLAVGPALFIWFCSLGGIGIYNIVQYDSSVLRAFNPIHIYYFFKRNSTKAWYSLGGCLLCATGSEAMFADLCYFSVRSVQLTFVCLVLPCLMLGYLGQAAYLMENPSGADQAF…
10	175	Dicotyledons	Rosales	Strawberry	Fragaria vesca	8	FvHAK8	I:a	mrna00202.1-v1.0-hybrid mrna00202...	MDGYFLPINPRHPISFQRSKQVIIIINKMAEKVESMREPAETELTEGEELEKKNEQMKERKVSWAKLRRVDSLNLEAGRVTMSHHHGSQVNWRRTLSLAFQSIGIVYGDIGTSPLYVYSSTFTDGIDHTDDIIGVLSLIIYTIALLPMLKYVFIVLFANDNGDGGTFALYSLICRYAKVSLIPNNQPEDRQLSNYKLDLPSNELKRAQTIKKKLENSKMAQYILFIVTIMGTSMVIGDGVLTPSISVLSAVSGIDSLGKNAVVGVSVLILVALFSVQRFGTDKVGFAFAPIITVWFLFISGIGLYNLFVHDIGVLRAFNPMYMVQYFQRNGKKGWVSLGGIFLCITGTEAMFADLGHFNVKAIQSIIHLHALLLMLSLLLLLSSRLQSSAVASTVIDAS…
10	176	Dicotyledons	Rosales	Strawberry	Fragaria vesca	9	FvHAK9	I:a	mrna11894.1-v1.0-hybrid mrna11894...	MAEKVESMREELVQTEPTEGEVLEKKIEQMKERKVSWGRVDSLNLEAGRVSMTHRHGSQVNWRRTLSLAFQSIGIVTFTHGIDHTDDIIGVLSLIIYTIALLPMLKYVFIVLWANDNGDGGTFALYSLICRYAKVSLIPNNQPEDRQLSNYKLDSPCNELKRAQTIKKKLENSKMAQYILFIVTIMGTSMVIGDGVLTPSISVLSAVSGIDSLGKTAVVGVSVLILVLLFSVQRFGTDKVGFAFAPIIMVWFLFISGIGLYNLFVHDIGVLRAFNPMYIVQYFQRNGKKGWVSLGGIFLCITGTEAMFADLGHFNVKAIQVSFSCVTFPALITAYCGQAAYLRKFPDHVEKTFYNSIPAPLHWPTFVVAVAAAIIASQAMISGAFTIISQSLTLGCFPR…
10	177	Dicotyledons	Rosales	Strawberry	Fragaria vesca	10	FvHAK10	I:a	mrna00129.1-v1.0-hybrid mrna00129...	MGEKAVRTEDAAAGDKMGAEMRRIDSLNIEAGKVSTYDGFHRAKHSWKTTLSLAIQSVGVVYGDIGTSPLYVYSSTFPNGIKEKDDILGVLSIIIYTIFFVPMLKYVFIVLQANDNGEGGTFAMYSLICRHAKVSLIPNNQPEDTELSNYKLDTPSSELKRSQAIKKKLETSRLAQYVLFVITITGTSMVIGDGVLTPCISAVLSAVSGLQQSGIKSLDQSAIVWISVAILILLFVVQQFGTDKVGFTFAPIILLWFLFLTGIGIYNLIKYDITVLKAFNPWYIVKYFQRNGKAAWISLGGAVLCITGTEAMFADLGHFSVRAIQVSFTFFTFPTILFAYLGQSAYLTKNPGDVATTFYASIPKPLYWPTFVVAVLAAIIASQALITGTFSIIAQSLGM…
10	178	Dicotyledons	Rosales	Strawberry	Fragaria vesca	11	FvHAK11	I:b	mrna24907.1-v1.0-hybrid mrna24907...	MPEDAILEDAADRTESHDCQEEEAHHRQLKTKKLSWQKLRRFDSLDIESRSVNGHHGHSSTDASWSVILQLAFQSIGIVYGDIGTSPLYVYASTFSKGIKDTDDILGVLSLIIYTITLIPLIKYVFIVLQANDNGDGGTFALYSLLCRYAKVSLTPSQQAEDRDVSNFQLELPSKRLRRASKLKSKLENSKFAKYFLLFATMLGTSMVIGDGVLTPCISVLSAVGGIKQATSAMTDDMIVWISVCILVCLFMAQRFGTDKVGYSFAPIICVWFTLIGGIGVYNFFKYDPTVLKALNPQYIVDYFKRNKGDAWISLGGIVLAITGTEALFADVGHFTVRSIQISMCSVTYPALLLAYTGQASFLREHKSLVSDTFFESIPKPLYWPMFGVAVMASIIASQ…
10	179	Dicotyledons	Rosales	Strawberry	Fragaria vesca	12	FvHAK12	IV	mrna00608.1-v1.0-hybrid mrna00608...	MAQYWYVVTLAGDQSGPLGIDRIEREITLPRFGIQREAIIAEAPPRMAVSVALGGGVGPGTDELQTTVVAMTEWRKLGESKRGRVKMDTDLKRMKTFFFLIRLGSESEPMDRVRNSPATESDTFEVVVDSATNGSRLTYHASIPARNADKGRFKRENLVLAYKTLGVVFGGLVTSPLYVYPSMPLKSPTEDDYLGIYSIMFWTLTLIGVVKYAGIALKADDQGEGGTFALYSLLCRNMDIGILSSRPSNPNFSLADTMFDEATEKQSRLAKFFKKSIVARRLLLFIAMLGMCMVIGDGILTPAISAIVEALSAVVLIILFLLQKFGTSRAYSRLYHHTISSVSFGETVRKAGCCLVELSFASQKMLKMITQILFHVHFTVKYQSNPCYHSYLGSEAMFA…
10	180	Dicotyledons	Rosales	Strawberry	Fragaria vesca	13	FvHAK13	IV	mrna06032.1-v1.0-hybrid mrna06032...	MAEMASPPPPRAARVSVKSPGPADQGGMFLEKARRCVRTVFFMVAMVASLLVSSLPVLVAIGDIMVPCVLISSFTCVTCYGFKEHLHRYAFKSSLVDVPLVSFIRSLIITCVYSMCDGPSLSHGPYLGTVTICSFTSILVLSVKVCVFTVNSQIEAEASTSLSRQKLHLKKSWGMPVLFLSSVVFALGHTVVAYRTSCRARRKLMFHRVDPEAVLLCKNVFSGYQKVPRSPTPSGGKTPKSDSEMRRKPFATAREEGELPVRVVADIDSLFITCQGLTLHYKISLPGSPPRSLSSVAFLESNLSCSSPKTAMGRPKPDRHPLSLLSKGQNHLHRSYSNQFHGSSLYIPLLDGSSTSPALSEEIPVLRLADAGDQDEGSKLNSGNPNNDMEGSGQFGIVL…
10	181	Dicotyledons	Rosales	Strawberry	Fragaria vesca	14	FvHAK14	II:c	mrna09346.1-v1.0-hybrid mrna09346...	MDWVGFCLFGLLNISHLPDDVISFLASGCIFMRACGLPPVWKGAADVSRVLDWVWAAPHLFWQGVGCGTLASSSACGLGDLAFVGDNIGVVKRGGNRTWVKVKTVDCGLIGLICDCSLYSFSFSVDQFELSKLLGDRSCEGLVGSVNMASQVRGERRDNNRSRNPSQPRWVPRGSNPTAAAVNPPPPGFSLNLQNGNANGPAAGESRQHRGGHGGNGGQPNHVSAPGESRQHRGGYNGNGGQLNQVSGPSESRQQRGGHNGNGGQSNYSFTPSDGRQHRGGHNGIVGQFNHSSVPSESRQHRGGHNGNGGQSNQSSTLSENREHRGGHHGYRGNVVRPVNHRREREKSESQEGMGMKDSSLPQLVQEIQDKLTKGTVECMICYDMVRRSAPVWSCSSCY…
10	182	Dicotyledons	Rosales	Strawberry	Fragaria vesca	15	FvHAK15	II:a	mrna31988.1-v1.0-hybrid mrna31988...	MTRQIWISYDAVDSRGQIRRILRSAYRSFGLVFGALCIPPIYVYKCAFSGGLFNYQSEDVVFGVFSVIFWTITLTSLIKYAAFVLSANDNGEGGVIALYALICRNAKLCLIPNHQAADEEITTYRYPGHSSSNMPNSWLKRFIERHKSVRTCLLVLVLFAACMVICVGILSPAISGTEYMFADLGNFKTRPIRVAFSCVIYPCLILQYMGQAAFLSRNLSAVSMSFYASVPAPLIWPVLVVAPLAAIVASQPVISSTFSIVKQCHAIRCFPRVKVVTNRRIPGQLYIPEINWSLLILSLAITVGLRDINYIGHAYVFMVVMYVWQYGMRKKYSYDLHNKVSMKWILTLGPSLGIVRVPGIGLIYTELATGIPSTFTHFLTNLPAFYQVVVFVCIKTIPV…
10	183	Dicotyledons	Rosales	Strawberry	Fragaria vesca	16	FvHAK16	II:b	mrna30037.1-v1.0-hybrid mrna30037...	MARQMDPESASASGGSRMTMSSGICTLGPSVSVNKKFGVKDMYLQNFYAATLCLAYQSLGIVYGDLSISPIYAYKSTFSGGLQLYEEDIEILGVLSMVLWTLTLIPLCKYMIFVLAADDHGEGGSFALYSLLCRHSRMGFLNTINPSQEHISSCRSEMSKDTRTSLLIKQFFEKHKNSRVVLVLVVFLGTGMIIGDGILTPTMSVLSAVYGIKVKVPELHESTEAMFADLGHFSKLSIRVAFTGFIYPCLVLAYMGEAAFLSKHKMDLHRSFYMAIPEVIFWPVFIIATLASVVASQAIISATFSIVSQCRGLRCFPRVKIKHTSNQIFGQIYIPEVNWILMVLCLAVIIGFRDTDMIGNAYGLAAVSVMFITTCLMFLIISTVWKQNILVASLFVIIF…
10	184	Dicotyledons	Rosales	Strawberry	Fragaria vesca	17	FvHAK17	II:b	mrna07942.1-v1.0-hybrid mrna07942...	MNPSEELVEQGISPRNLQRVSCTAAVLTLAYQSLGVVYGDLSISPLYVYKTTFSGKLSLHEDGEEIFGVLSFIIWTFTLIALCKYVFIVMLADDNGEGGTFALYSLLCRHARLSILPNQEITDEKLSEYVTEGNTDTSHSAALKSFFNKHPRFRKGLLIFVLFGTCMAIGDGVLTPSISVLSAVSGVKIKFKELHDSESSFHHGTHRVAFMFAPIITAWLLCISGIGIYNIVHWNQRVFLALSPVYMLKFLRTTRIDGWVSLAGVVLSITGVEAMFANLGHFSSLSIKLAFTCLVYPSLVLSYMGEAAFLSKHHEDIQRSFYRSIPGKKLSQKPGSYFSHLFHHKPVFCSEVLSTGQDSSYFKVGSDQCNVCDNLLDGSASVTKIPEGGWIPVLMSLVF…
11	185	Dicotyledons	Rosales	Apple	Malus domestica	1	MdHAK1	I:a	MDP0000202551 chr4:6999595..7007827 841 0.0	MAEKVVILTEGETEEAKEITNQQLKERKGSWAKLRHVDSLNLEAGRVSMNGRHGSQVNNWQRTLSLAFQSMGIVYGDIGTSPLYVYASTFTDGIDNTDDVIGVLSLIIYTIALVPLLKYVFIVLWANDNGDGGTFALYSLMCRHAKVSLTPNNQPEDRELSNYKLETPSNELKRSQTIKKKLENSKIAKYILFLVTIMGTSMVIGDGVLTPCISVLSAVSGIKSLGSDAVVGISIAILILLFAVQQFGTDKVGFTFAPIILVWFMFIGGIGLYNLFKYDIGVLRAFNPKYIIDFFRRNGKKGWVSLGGIFLCVTGTEAMFADLGHFSVKAIQVSFSCITFPALIIAYSGQAAFLRKFPGKVENTFYDSIPDPLYWPTFIVAVAAAIIASQAMITGAFSI…
11	186	Dicotyledons	Rosales	Apple	Malus domestica	2	MdHAK2	I:a	MDP0000196573 chr13:10200152..10205969 828 0.0	MAEKVVSLKEEETEEAKEITNQQLKERKVSWAKLRRVDSLNLEAGRVSMNGRHGSQVNNWHRTLSLAFQSIGIVYGDIGTSPLYVYESTFTDGIDNNDDIIGVLSLIIYTIALLPLLKYVFIVLWANDNGDGGTFALYSLMCRHAKVSLTPNNQPEDRELSNYKLETPSNELKRSQTIKKKLENSKIAKYSLFLVTIMGTSMVIGDGVLTPCISVLSAVSGIKSLGTEGSHLFSVSSFRHLLTSTWNNPDTVVGISIVILIILFSAQRFGTDKVGFTFAPIILVWFLFIGGIGLYNLFKHDVGVLRAFNPKYIIDFFRRNGKRGWISLGGIFLCITGTEAMFADLGHFTVKAIQVSFSCITFPALVLAYSGQAAFLRKFPGKVDQTFYDSIPDPLYWPT…
11	187	Dicotyledons	Rosales	Apple	Malus domestica	3	MdHAK3	I:a	MDP0000819805 chr13:10233566..10236878 816 0.0	MGENSETTDEPRISMRRVDSLNLEAGKVSMPNHHGSNMSWKTTIGLAFQSIGIVYGDIGTSPLYVFSSTFPNGIDHKDDILGVLSLIIYTILLVPLVKYVLIVLWANDNGEGGTFALYSLICRYAKVSLIPNTQPEDRELSNYKLEISSELKRSQAIKKKLENSKYAKYTLFFITIMGTSMVIGDGVLTPCISVLSAVSGIKSLGANAVVGISVAILIVLFAVQQFGTDKVGFSFAPIILLWFAFISGIGLYNLIVYDVTVLRAFNPAYFIYYFHRNGKKAWISLGGVVLCITGTEAMFADLGHFSVRAIQLSFTCCTFPAILFAYFGQAAFLTKFPDKVSDTFYASIPHAIYWPTFVVAVLAAIIASQALITGTFSIISQSLSMGSFPRVKIVHTSAK…
11	188	Dicotyledons	Rosales	Apple	Malus domestica	4	MdHAK4	I:b	MDP0000225313 chr11:34199832..34206005 761 0.0	MPDEEVVVENPTDIEGSQDHQEVSDRHDHHKDQLKGKRLSWQKLRRYDSLDLESRHFTAPHGHASKGADWSVIMHLAFQSIGIVYGDIGTSPLYVYASTFTKGINHXDDILGVLSLIXYTLTLIPXIKYVLIVLRANDNGDGGTFALYSLLCRYAKVGLTPSQQAEDRDVSNFQLDLPTKSVKRASRLKSSLENSPFAKVFLLFATMLGTSMVIGDGVLTPCMSVLSAVGGIKEATSAMTEGRVVLISVVILIALFMIQRFGTDKVGYSFAPIICIWFTMIGGIGVYNFIKFDPTVVKALNPQYIVDYFRRNKKDAWISLGGIVLAITGTEALFADVGHFTVRSIQISMCTVTYPALILAYTGQASFLRKHHLLVADTFYKSIPKPLYWPVFIVAVMAS…
11	189	Dicotyledons	Rosales	Apple	Malus domestica	5	MdHAK5	IV	MDP0000146195 chr3:32366951..32371975 683 0.0	MATSEVLNTKMVQVHRTNLPKTKKKRTRATDTSMSKAGAWXKEGIXPALQAXFEXVLEGLQLVGRLQIRRVIVESDSXLAIAAINNYSHDLSEFGLLAEDVSGGGGCVLMDQPPHSPPATSSEVSVVVDSATNDHRLNRPRIXNGXTXNDKGKSRWGNLLVAYRTLGVVFGGLVTSPLYVYPSMHLKSPTEADYLGIYSIMFWTLTLIGVVKYASIALNADDHGEGGTFALYSLLCRHMXIGILNSXPASSNSSLSRSILDDGIENXSXLAKFFKKSVVARRMLLFIAMLGTCMVIGDGILTPAISALVEALSAGVLIILFLLQKFGTSRVSFLFSPIMGTWTLVTPLXGIYSIIRHYPXIFKAISPHFIFHFFQRNGKEGWLLLGGTVLCITGSEALF…
11	190	Dicotyledons	Rosales	Apple	Malus domestica	6	MdHAK6	V	MDP0000235333 chr16:4195416..4199589 635 0.0	MAEEDGIVERSERLAGRSGSGVGSDSRWVDGSEVDSESAAWSLPSENGGGEGGEGYGGSLRRRLVKKPIRVDSLDVEAMEIAGAGGHGVRLIIWYIWNEVXYFADVGVAASTRAEDHSVWSTLLLGFQTLGVVYGNVGTSPLYVFADVFSRVPIESDVDVLGALSLVMYTIALIPLAKYVFVVLKANDNGEGGTFALYSLICRYANVNMLPNRQPADEHISNYKLKLPTPALNRALRIKETLEKRSLLKTILLLFVLMGTSMVIGDGILTPAISVMSAVSGLQGEVPGFGTNAVVILSVVILLLLFSIQQFGTGKVGVMFSPILALWFFSLASIGIYNLVKYDITVLRAFNPAYIYFFFKKNDKEAWYALGGCVLCITGAEAMFADLGHFSVRAIQVAF…
11	191	Dicotyledons	Rosales	Apple	Malus domestica	7	MdHAK7	I:b	MDP0000146130 chr3:32337590..32344202 635 0.0	MPDIVENSTDLVSQDHQEVSDHPDHDEDQLEGKKLSWERLPRDDSLDLESRSLTVPHGHESKDEDWLVTMHLAFQSIGVVFGDLGTSPLYMYASIFNKGINHDDDILGVLSLLFYILTLIPLIKYTFIVLRATDNGEGGTFALYSLLCRYAKIGMTPSQQPEDRDVSNFELEFPTKSVKRASRLKSLLENSPSAKVFLLFATMLGTSMVIGDGILTPSLSVLSAVVGIKQATSAMTDDRIVWISVAILIGLFMNFIKFDPTVVKALNPKYIVDYFRRNKHDAWISIGGIVLAITGTEALFADVGHFTVRSIQLSMCTITYPALVLTYAGQASFLRKNRLLVADTFFKSIPMSVLSSIISSQAMISGTFSXIQQSLSLGCFPRVKIVHTSTKYAGQVYIP…
11	192	Dicotyledons	Rosales	Apple	Malus domestica	8	MdHAK8	V	MDP0000147255 chr13:5907016..5911437 632 0.0	MAEEDGIVERSERLAGRSGSGVXSDSRWVDGSEVDSESPPWSLHSDNGERGRGEGYGGSFRRRLVKKPKRVDSLDVEAMAIAGAGSHHLKDHSVWGTLALGFQTLGVVYGDMGTSPLYVFADVFSRVRIESDVDVLGALSLVMYTVALIPLAKYVFVVLKANDNGEGGTFALYSLICRYANVNLLPNRQPADEYISSYRLKLPTPELKRALRIKDTLERRPFLKTILLLFVLMGTSMVIGDGILTPAISVMSAVSGLQGELPGFGTNAVVVVSIVILLVLFSIQRFGTGKVGVMFSPILALWFFSLASIGIYNLVKYDVTVLRAFNPAYIYFFFKKNNKEAWFALGGCVLCITVKKLPKCISGYAVSGAEAMFADLGHFSVRAIQVAFSFVVFPCLLLA…
11	193	Dicotyledons	Rosales	Apple	Malus domestica	9	MdHAK9	I:b	MDP0000164610 chr11:34176970..34182202 612 e-175	MTFWVFFLLIFYTLTLIPLIKYVLIVLRANDNGDGGTFALYSLLCRYAKVGLTPSQQAEDRDVSXFQLELPTKSVKRASRLKSSLENSPFAKXFLLFATMLGTSMVIXDGVLTPCISVLSAVGGIKEATSAMTQGRVVLISVVILIALFMVQRFGTDKVGYIFAPIXCIWFTMIGGIGVYNFIXFDPTVVKALNPQYIXDYFRRNKKDAWISLGGIVLAITGTEALFADVGHFTVQSIQIKPLYWPMFVVAVMAAIIASQAMISGTFSIIQQSLSLGCFPRVKIVHTSTKYAGQVYIPEVNYLLMLACVGVTLGFRSTAKIGNAYGVAVVFVTTLTSSFLVLIMIMIWKTNIFLVISYVLVIGSVELLYLSSVLYKLDQGGYLPLAFATLLMFIMFVWN…
11	194	Dicotyledons	Rosales	Apple	Malus domestica	10	MdHAK10	III	MDP0000276517 chr10:24148156..24154433 606 e-173	MEAVESFEISKASKVEVDGDSDNTNKGSMWVLDQKLDQPMDEEAGRLRTMYREKKFSSLLLMRLAFQSLGVVYGDLGTSPLYVFYNTFPHGINDPEDVVGALSLIIYSLTLVPLLKYVFVVCRANDNGQGGTFALYSLLCRHANVKTIPNQHRTDKDLTTYSRSTFHEQSYAAKTKKWLERYASRKNSLLILVLVGTCMVIGDGILTPAISVLSAAGGIKVSSPGMKNGTHYVILVAVVILVGLFSMQHYGTDKVGWLFAPIVLLWFLLIGGIGIFNIWKHDSTVLRAFSPVYIYRYFKRNGREGWISLGGIMLSITGTEALFADLAHFPVSAVQIAFTTVVFPCLLLAYCGQAAFLVKNHSDEILLQAFYRSIPEKIYWPVFIVATLAAIVASQATIS…
11	195	Dicotyledons	Rosales	Apple	Malus domestica	11	MdHAK11	V	MDP0000247022 chr5:28757344..28766403 593 e-169	MADEEGPERGEINGGPASMDSIESRWVFQDEDDSDLDDDDAEAHAMHRTVVDSEDDEEEDDNAEQRLIRTGPRVDSFDVEALEVPGALRNEYEDFSLGRKIIIAFQTLGVVFGDVGTSPLYTFSVMFKKAPINGNEDVIGAMSLVLYTLILIPLLKYVLVVLWANDDGEGGTFALYSLICRHAKVSLLPNQLPSDARISSFRLKVPSPELERSLKIKERLEASLTLKRLLLTLVLAGTAMVIADGVVTPAMSVVSAVGGITVEVEAIKQDQVVMISVAFLVILFSVQKFGTSKVGLAVGPALFIWFCSLGGIGIYNLVKYDSSVFKAFNPIHIYYFFKRNSTKAWYALGGCILCATGSEAMFADLCYFSVRSVQLTFVFLVLPCLMLGYLGQAAYLMEN…
11	196	Dicotyledons	Rosales	Apple	Malus domestica	12	MdHAK12	I:b	MDP0000157997 chr11:34204764..34210667 583 e-166	MHLAFQSIGIVYGDIGTSPLYVYASTFTKGINHSDDILGVLSLIFYTLTLIPLIKYVLIVLRANDNGDGGTFALYSLLCRYAKVGLTPSQQAEDRDVSXFQLELPTKSVKRASRLKSSLENSPFAKXFLLFATMLGTSMVIGDGVLTPCISVLSAVGGIKEATSAMTQGRVVLISVVILIALFMVQRFGTDKVGYXFAPIICIWFTMIGGIGXYNFIXFDPTVVKALNPQYIXDYFRRNKKDAWISLGGIVLAITGTEALFADVGHFTVXSIQIKPLYWPMFVVAVMAAIIASQAMISGTFSIIQQSLSLGCFPRVKIVHTSTKYAGQVYIPEVNYLLMLACVGVTLGFRSTAKIGNAYGXAVVFVXTLTSSFLVLIMIMIWKTNIFLVISYVLVIGSV…
11	197	Dicotyledons	Rosales	Apple	Malus domestica	13	MdHAK13	III	MDP0000182785 chr5:9030947..9036528 579 e-165	MASNAEVNGDSDTTNKGSMWVLDQKLDQPMDEEAGRLRTMYREKKFSALLLMRLAFQSLGVVFGDLGTSPLYVFYNTFPHGINDPEDVVGALSLIIYSLTLVPLLKYVFVVCRANDSGQGGTFALYSLLCRHANVKIIPNQHRTDEELTTYSRSTFHEQSXAAKTKKWLEGHASRKNALLLLVLIGTCMVIGDGILTPVISGTHSSTVGIILTSLXDLLKKNMVPLPWVEVMSWKWKLKMTNYALLLTVLSAAGGIKVRSPGMNNDYVILVAVVILVGLFSVQHYGTDKVGWLFAPIVLLWFLLIGGIGIFNIWKHDSTVLRAFYPVYIYRYFKRNGRDGWTSLGGIMLSITGTEALFADLAYFPVSAVQIAFTTVVFPCLLLAYCGQAAFLVKNHEDK…
11	198	Dicotyledons	Rosales	Apple	Malus domestica	14	MdHAK14	II:c	MDP0000223735 chr17:2531764..2536020 568 e-162	MDLEGVIRSHPIKKDSWMTVLTLAYQSLGVVYGDLSTSPLYVYKSTFAEDIHHSETNEEIFGVLSFVFWTLTLIPLVKYVFIVLRADDNGEGGTFALYSLLSRHARVSSLPNCQLADEELSEYTKDGVVPTANSAFGSSLKSTLEKHKALQKVLLVLALIGTCMVIGDGVLTPAISVFSAVSGLELSMSKEQHRYVEVPVACVILXFLFALQHYGTHRVGFLFAPVVITWLLCISSIGVYNIIYWNPHVYQALSPYYMYKFFKKTRKGGWMSLGGILLCMTGSEAMFADLGHFSQTSIKIAFTFVVYPSLILAYMGQAAYLSKHHIIESDYRIGFYESVPEKLRWPVLAIAILAAVVGSQAIITGTFSIIKQCSALGCFPRVKIVHTSSKIHGQIYIPE…
11	199	Dicotyledons	Rosales	Apple	Malus domestica	15	MdHAK15	II:c	MDP0000853168 chr4:3186052..3189736 568 e-161	MDLERIKCWDTSKKDSWKNVMLLAYQSLGVVYGDLSISPLYVYKSAFAEDIQHSDTNEEIYGVLSFVFWTLTLVPLFKYVFIVLRADDNGEGGTFALYSLICRHAKVSLLPNRQLADEALSTYKLEHPPEKEKSSRVKVVLEKCKTLHTALLILVLLGTCMVIGDGVLTPAISVFSAVSGLELSMSKEHHQYAVVPITCFILLCLFALQHYGTHRIGFLFAPVVLAWLLCISALGLYNIIHWNRYVYHALSPYYMFKFLRKTRISGWMSLGGILLCITGSEAMFADLGHFSYNAIQVAFTFLVYPALILAYMGQAAYLSQHHHSSHQISFYVSVPETVRWPVLVLAILASVVGSQAIISGTFSIINQSQSLSCFPRVKVVHTSDKVHGQIYIPEINWML…
11	200	Dicotyledons	Rosales	Apple	Malus domestica	16	MdHAK16	II:c	MDP0000268194 chr13:5886665..5892862 555 e-158	MGFVFSPQSEAKHGSARSLSPPAMDQETGVYQNHIKKQSWKTILTLAYQSLGVVYGDLSTSPLYVYKSTFAEDIDHSETNEEIFGVLSFVFWTLTLIPLLKYVFIVLKADDNGEGGTFALYSLLCRHARVSSLPNSQSADEELSDYNKERAGTALQSSIGSRLKSTLERHKVLQRFLLVLALIGTCMVIGDGVLTPALSVFSAVSGLELSMSEKHHKYVEVPIACIILIGLFALQHYGTHRVGFLFAPIVLIWLLCISAIGVYNILHFNPSVYKALSPYYMYKFLRKTQKGGWMSLGGIMLCITGSEAMFADLGHFTQLSIQIAFTSLVYPALVLAYMGQAAYISSHHNVGKNSQIGFYPSVPENLRWPVLVIAVLAAVVGSQAIITGTFSIIKQCSAL…
11	201	Dicotyledons	Rosales	Apple	Malus domestica	17	MdHAK17	II:b	MDP0000249888 chr10:21172961..21177448 543 e-154	MDPESASLSGGLRPNFYTTTLCLAYQSLGIVYGDLSISPIYVYKSTFSHGLSLYAEDHEILGVLSMVFWTLTIIPLCKYIIFVLGADDNGEGGTFALYSSLCRHSRLGLWNTVHPEYESIPSDCSGLSTKDTRMSSLIKKFFEKHKSSKIVLLLVVFIGVGMIIGDGILTPTMSVLSAVSGIRIKAPDLHENYTVLIACIILVGLFALQHFGTHKVGFLFAPIMLTWLLCICGVGIYNIFRWNPGVICALSPYYIYNFFKITRRVGWXSLGGVVLCVTGTEAMFADLGHFSKLSIRIAFTALVYPCLILAYMGEAAYLSKHKKDLRCSFYMAIPEVMFWPVVIIATLASAVGSQAIISATFSIVSQCRALRCFPRVKIKHTSNQIHGRIYIPEVNWMLM…
11	202	Dicotyledons	Rosales	Apple	Malus domestica	18	MdHAK18	II:c	MDP0000283899 chr16:4176631..4180661 536 e-152	MDLETGVYQNHIKSLGVVYGDLSTSPLYVYKSTFAEDIEQSETNEEIFGVLSFVFWTLTLVPLLKYVFIVLKADDNGEGGTFALYSLLCRHARLSSLPNCQSADEELSDYKKERADTALQSSFRARLKSTLERHRVLQRFLLVLALIGTCMVIGDGVLTPALSVFSAVSGLEFSMSEKHHKFVEVPIACLILIGLFALQHYGTHRVGFLFAPIVLTWLLCIGAIGVYNILHFNPSVYKALSPYYMYKFLRKTQKGGWMSLGGILLCITGSEAMFADLGHFSQLSIQIAFTSLVYPALVLAYMGQAAYISSHHNVGKNSQIGFYPSVPATPPSSEKLRWPVLVIAVLAAVVGSQAIITGTFSIIKQCSALDCFPRVKIVHTSSKIHGQIYIPEINWILMV…
11	203	Dicotyledons	Rosales	Apple	Malus domestica	19	MdHAK19	II:c	MDP0000179676 chr4:3178392..3184053 535 e-152	MDLERIKCWDTSKKDSWKNVMLLAYQSLGVVYGDLSISPLYVYKSAFAEDIQHSDTNEEIYGVLSFVFWTLTLVPLFKYVFIVLRADDNGEGGTFALYSLICRHAKVSLLPNRQLADEALSTYKLEHPPEKEKSSRVKVVLEKCKTLHTALLILVLLGTCMVIGDGVLTPAISVFSAVSGLELSMSKEHHQYAVVPITCFILLCLFALQHYGTHRIGFLFAPVVLAWLLCISALGLYNIIHWNRYVYHALSPYYMFKFLRKTRISGWMSLGGILLCITGSEAMFADLGHFSYNAIQVAFTFLVYPALILAYMGQAAYLSQHHHSSHQISFYVSVPGRCNSSSFFGTETVRWPVLVLAILASVVGSQAIISGTFSIINQSQSLSCFPRVKVVHTSDKVHG…
11	204	Dicotyledons	Rosales	Apple	Malus domestica	20	MdHAK20	Ib	MDP0000224428 chr3:32376369..32379304	MAVLAAVGGIKRATSAMTEDWVVLISVAILIGLFMVQRFGTDKVGYSFAPIICIWFIMIAGIGVYNFIKFDPTVVKALNPQYIVDYFRRNKKDAWISLGGIALAITGTEALFADVGHFTVRSIQISMCAVTYPXLVLAYTGQASFLRKHHLLVEDTFFESIPKPLYWPMFGVAVMASIIASQAMISGTFSIIQQSLSLGCFPRVKVVHTSTKYAGQVYIPEVNYLLMLACVGVTLGFRSTEEIGNAYGIAVVFVMTLTSSFLVLIMIMIWKTNIFLVISYVLVIGSVEFLYLSSVLYKFNQGGYLPLAFATVLMFVMFVWNDVHQRKYYYELNHKISPEQLKEIAIDANFSHLPGLAVFYSELVQGIPPIFNHYVANVPALHSVLVFVSIKSLPISKVP…
11	205	Dicotyledons	Rosales	Apple	Malus domestica	21	MdHAK21	II:c	MDP0000170687 chr1:21916917..21920533 531 e-150	MDLERIKCYDTPKSLGVVYGDLSISPLYVYKSAFAEDIQHSDTNEEIYGVLSFVFWTLTLVPLFKYVFIVLRADDNGEGGTFALYSLICRHAKVSLLPNRQLADEALSTYKLEHPPEKEKSSRVKLVLEKCXTLHTALLILVLLGTCMVIGDGVLTPAISVFSAVSGLELSMSKEHHQYAVVPITCFILLCLFALQHYGTHRIGFFFAPVVLAWLLCISALGLYNIIHWNQHVYQALSPYYMFKFLRKTRISGWMSLGGILLCITGAEAMFADLGHFSYNAIQVXFTFLVYPALILAYMGQAAYLSQHHHTSHRISFYVSVPESVRWPVLVLAILASVVGSQAIISGTFSIINQSQSLGCFPRVKVIHTSDKVHGQIYIPEINWMLMILCIAVTIGFRD…
11	206	Dicotyledons	Rosales	Apple	Malus domestica	22	MdHAK22	V	MDP0000147669 chr10:6212553..6222692 514 e-145	MEEEEGPDRGEINGGLASMXSIESRWVFQDEDDSEDADTEEDAMHRTVLDSEDDEEEDDNAEQRLIRTGPRVDSFDVEALEVPGAHRTEYELLDSGTCGGGAELGILLGEESIDFGRVAAGRTLSFRFLATWYFHVLTMDFSLGRKIIIAFQTLGVVFGDVGTSPLYTFSVXFSKAPINGNEDVIGAMSLVLYTLILIPLLKYVLVVLWANDDGEGGTFALYSLICRHAKVSLLPNQLPSDARISSFRLKVPSPELERSLKIKERLEASLTLKKLLLMLVLAGTAMVIADGVVTPAMSVVSAVGGLKVGVEAIEQGIVYPVDHVSKMGLSCHDSVGVHHTKNVQKFGTSKVGLAVGPALFIWFCSLGGIGIYNLVKYDSSVLKAFNPVHIYYFFERNST…
11	207	Dicotyledons	Rosales	Apple	Malus domestica	23	MdHAK23	III	MDP0000283526 chr5:9021703..9027821 513 e-145	MAADESTDKNGSVWVLDQQLDQPMDEEAKRLRIMYKEKVXSHSFTPVLQWNCFKTEFTSTNRNSTLNFRNLAVQRLGWFVYNQFIIVIRDMLLILTFRTIWLKRLLYVTLKKFSALLLVQLAFQSLGVSLTLIPLLKYVFIVCXANDNGQGGTFALYSLLCRYAKIKAIPNQDQTDEALTTYSXSSFGQKSFAARTRRWLEGHAFMQSTLLILVLVGSCMVIGDGILTPAISEVVVLVAVVILILLFSXQRYGTDKVGWLFAPIVFIWFLVIGGIGMFNVWKYDSRVLKAFSPVYVYRFFKRGGKDGWTSLGGIMLSITGTEALFADLSHFPVPSVQLAFTLVVFPCLLLAYCGQAAYLXKNPHNVFGAFYHSIPDNIYWPVFIVATGAAVVASQATIT…
11	208	Dicotyledons	Rosales	Apple	Malus domestica	24	MdHAK24	I:b	MDP0000156921 chr11:34195304..34197790 461 e-129	MVQRFGTDKVGYSFAPIICIWFTMIGGIGVYNFIKFDPTVVKALNPQYIIDYFRRNKKDAWISLGGIVLAITGTEALFADVGHFTVRSIQIKPLYWPMFVVAVMAAIIASQAMISGTFSIIQQSLSLGCFPRVKIVHTSTKYAGQVYIPEVNYLLMLACVGVTLGFRSTAKIGNAYGXAVVFVMTLTSSFLVLIMIMIWKTNIFLVISYVLVIGSVELLYLSSVLYKFDQGGYLPLAFATLLMFVMFVWNDVHRRKYYYELEHKISPEQLKEIAVDANFSRMPGLALFYSELVQGIPPIFNHYAANVPALHSVLVFVSIKSLPISKVPLEERFLFRRVEPKDXNVFRCXARYGYTDVRNENEPFEGLLVEKLKEFIKDSFWISQTNXMHSSXNGDTXXE…
11	209	Dicotyledons	Rosales	Apple	Malus domestica	25	MdHAK25	II:c	MDP0000179283 chr6:24044963..24050997 457 e-128	MKNCLIELFFVDKKILAYDWIYICSLSLTSDGSVTPKFLSHRTNRHIFIFDVDRLIGCGFEPSRVKKQMNNQSWTNYKSTPNKQQKIRTGETPNKQQTIQTGEINHTKRTCHMWEVPPSYPKPTSQTERHASLSNRHSISTTGVYKYEILSSPHYDTSMEPQLIAPNQFKETWKHTLLLSFQSLGVIYGQMSTAPLYVFGTLTADDITSEETVYELFSFIFWTINIISLLKYAFIVLTADDNGEGGTFALYSLLCRHAKVGLLPNESSANDVMHYETGSPFKIKAESRARRAIEKLRCGHYLMLFLALFGSCMTIGIGVLTPTLSVYSVSSGIQRSLSDISHRNVPVSTASAILVCLFTLQHYGTRKIGFIFAPIIVVWLFFIGGGGVYNIFHWNKEIL…
11	210	Dicotyledons	Rosales	Apple	Malus domestica	26	MdHAK26	II:b	MDP0000204536 chr5:11139395..11144056 441 e-123	MDPEXASLSGGLRPLLYYCFISERSSCMIIINLALRTEDVRRTQCPNSKIVXADFDIDNYCRXSDFNYNHGRGMNFYKTTLCLAYQSLGIVYGDLSISPIYVYKSTFSGDMRLYEEDHEILGVLSMVFWTLTIIPLCKYIIFVLGADDNGEVFIGVGMIIGDGILTPTMSVLSAVYGIRIKAPDLHENYTVLIACIILVGLFALQHFGTHKVGFLFAPIMLTWLLCICGVGIYNIFRWNPGVIRALSPYYIYNFFKITGRVGWSSLGGIVLCITGTEAMFADLGHFSKLSIRFAFTALVYPCLVLAYMGEAAYLSKHKTDLHSSFYMAIPEVMFWPVFIIATLASVVGSQAIISATFSIVSQCRALQCFPRVKIKHTSNQIHGQIYIPEVNWMLMVLCL…
11	211	Dicotyledons	Rosales	Apple	Malus domestica	27	MdHAK27	IV	MDP0000274228 chr13:778580..788450	MATSEVLNTKMVQVHRTNLPKTKKKRTRATDTSMSKAGAWXKEGIXPALQAXFEXVLEGLQLVGRLQIRRVIVESDSXLAIAAINNYSHDLSEFGLLAEDVSGGGGCVLMDQPPHSPPATSSEVSVVVDSATNDHRLNRPRIXNGXTXNDKGKSRWGNLLVAYRTLGVVFGGLVTSPLYVYPSMHLKSPTEADYLGIYSIMFWTLTLIGVVKYASIALNADDHGEGGTFALYSLLCRHMXIGILNSXPASSNSSLSRSILDDGIENXSXLAKFFKKSVVARRMLLFIAMLGTCMVIGDGILTPAISALVEALSAGVLIILFLLQKFGTSRVSFLFSPIMGTWTLVTPLXGIYSIIRHYPXIFKAISPHFIFHFFQRNGKEGWLLLGGTVLCITGSEALF…
11	212	Dicotyledons	Rosales	Apple	Malus domestica	28	MdHAK28	II:b	MDP0000268951 chr11:6114363..6118231 285 1e-76	MYIXSSSFCGTRTFENVRRGVSSFXVFISGFWRVSRXTVLTLAYQSLGVVYGDLSTSPLYVYKTTFSGKLSLREDDEEIFGVLSFIFWTFTLIALFKYVFIVMLADDNGEGGTFALYSLLCRHARLSILPNQEITDEKLSEYVTEGTTETWQSSALKSFFDKHPRFRKGLLVFVLFGTCMAIGDGVLTPAISVLSAVSGIKLKITGLHDNYVVIISCVVLVGLFSLQHHGTHRVAFMFAPIVTAWLLCISGIGIYNXFRWNKRIFXALSPVYMLXFLRSTGIEGWVSLAGVVLSITELLETSFLRNIISGVEAMFANLGHFSPLSIKXAFTLLVYPSLVLSYMGEAAFLSKHHEDIQRSFYXAIPGLAVTAVMFVTTCLMALVMXIVWKKSIITALAFL…
12	213	Dicotyledons	Cucurbitales	Cucumber	Cucumis sativus	1	CsHAK1	II:c	Cucsa.144040.1	MDLEPGKCWDSSKKDSWKTVLVLAYQSLGVVYGDLSISPLYVYRSTFAEDIQHSDTNEEIYGVLSFVFWTLTIVPLFKYVFVVLRADDNGEGGTFALYSLICRHAKVSLLPNRQVADEALSTYLLEHSPEKKKQSKVKLLLEKHRALHTALLILVLLGTCMVIGDGLLTPAISVFSAVSGLELSMTKAHHQYAVVPITCFILVCLFALQHYGTHRVGFVFAPIVLAWLLCISTLGIYNIIHWNPHVYEALSPYYMFKFLEKTRKSGWMSLGGILLCITGSEAMFADLGHFSYTAIQIAFTFLVYPALILAYMGQAAYLSQHHHTTKSIGFYVSVPESVRWPVLTIAILASVVGSQAIISGTFSIINQSQSLGCFPRVKVVHTSDKIHGQIYIPEINWIL…
12	214	Dicotyledons	Cucurbitales	Cucumber	Cucumis sativus	2	CsHAK2	V	Cucsa.183280.1	MEDGDRIEEGSSRLLPGSSVTGSSNDYRWVDGSEVDSELPPWSLFEDRDSVEASGSIRRRLIKKPKRVDSFDVEAMEIAGANPHHLKDVSMWQTIAIAFQTLGVVYGDMGTSPLYVFADVFTKVHIEEDVDVLGALSLVIYTIALIPLAKYVFVVLRANDNGEGGTFALYSLICRYAKVNLLPNRQPADEHISSFKLKLPTPELERALNIKEILEKRSSLKTLILLLVLMGTSMVIGDGILTPAISVMSAVSGLQGQIKSFDTNAVVIVSIIILVALFSIQKFGTGKVGFLFAPVLALWFFSLGSIGIYNVVKYDLTVVRALNPTYIYLFFKKNSNNAWSALGGCVLCVTGAEAMFADLGHFTVPAIQIAFTFVVFPCLLLAYMGQAAYLMKHPDSAAR…
12	215	Dicotyledons	Cucurbitales	Cucumber	Cucumis sativus	3	CsHAK3	II:a	Cucsa.032050.1	MEQGSGFSTSSNPSQLSRACLTRNLILAYQSFGVVYGDLSTSPLYVYSSTFAGKLQKHRTEEVVFGAFSLIFWTFTLIPLLKYVFIVLSADDNGEGGTFALYSLLCRHAKLSLLPNQQAADEELSAYRYGPSSHAVAPSQLKRFLERHKTLRTILLLVVLFGACMVIGDGVLTPAISVLSSVSGLQVTEAKLTNGTLLLIACAILVGLFALQHCGTHKVAFMFAPIVIIWLLSIFSIGLYNIIHWNPSIIRAISPHYVIKFFRVTGKDGWLSLGGILLAITGTEAMFADLGHFTALSIRIAFAFLIYPCLVVQYMGQAAFLSKNLNLFPNSFYDSIPDPVFWPVFVIATLAAIVGSQAVITATFSIVKQCHALGCFPRVKVVHTSKHIYGQIYIPEINW…
12	216	Dicotyledons	Cucurbitales	Cucumber	Cucumis sativus	4	CsHAK4	III	Cucsa.134460.1	MTSRVETDDDCETRGSMWVLDQKLDQPMDEEAGRLSNMYKEKKFSVLLLLRLAYQSLGVVYGDLGTSPLYVFYNTFPRGISDPEDVVGALSLIIYSLTLIPLIKYVFIVCKANDNGQGGTFALYSLLCRHAKVKTIPNQHRTDEELTTYSRSKFHEQSFAAKTKGWLEKQSSRKNALLILVLVGTSMVVGDGILTPAISVLSAAGGIKVNHPHVSSDVVVLVAVVILVGLFSLQRYGTDRVGWLFAPVVLLWFFLIGGIGMFNIWKYDKTILRAFSPVYIVRYFRRRGMDGWTSLGGVLLSITGTEALFADLAHFRVAAVQIAFTVVVFPCLLLAYSGQAAYLMNNTDHVVDAFYRSIPESIYWPVFVVATAAAVVASQATISATFSIIKQALAHGCFP…
12	217	Dicotyledons	Cucurbitales	Cucumber	Cucumis sativus	5	CsHAK5	II:c	Cucsa.339530.1	MDLESAIGGHPIKKDSWRAVLTLAYQSLGVVYGDLSTSPLYVYKSTFAEDIKHSETNEEIYGVLSFVFWTLTLIPLIKYVFIVLRADDNGEGGTFALYSLLCRHARVSSLPNCQLADEDLSEYTKDGVDLTNKKTCGSRLKSTLEKHRVLQRVLLVLALIGACMVIGDGVLTPSISVFSAVSGLELSMAKPHHRYVEVPVACAILVILFAIQHYGTHRVGFLFAPVVITWLLCISAIGLYNIFYWNPHVYRALSPYYMYKFLKKTQRGGWMSLGGILLCMTGSEAMFADLGHFSQLSIKIAFSFVVYPSLVLAYMGQAAYLSQHHGDSNYQVGFYVSVPEKLRLPVLVIAILAAVVGSQAVITGTFSIIKQCSALGCFPRVKIVHTSSKIHGQIYIPEI…
12	218	Dicotyledons	Cucurbitales	Cucumber	Cucumis sativus	6	CsHAK6	III	Cucsa.134470.1	MASGYKTDEETNDKDNSIWVLDHQMDQSMEEESRQLRNVHQEKDHSVYKILQFAFQSLGIVYGDLGTSPLYVFYNTFPDGVENTEDLIGALSLIIYSLTLITLIKYVFIVCKANDNGQGGTFALYSLLSRHANILTIPNHDLSDEKLTTYSRAVFREQSFAAKTKRRLEGHHVKKHAILVLVLVGSCMVIGDGILTPAISVLSAVEGINVGRAKISGDVAVLVAIVILIFLFSMQRYGTDKVGWLFAPVVFLWFILIGGIGIFNICKYDYTVLRAFSPVHIYRYFKRGGKDGWTSLGGIMLSITGTEALFADLSHFPVSSIQIAFTVVVFPCLLLAYTGQVAYLMKHPNYVVGAFYHSIPESIYWPVFLVATTAAIVASQATISATFSLIKQALALGCF…
12	219	Dicotyledons	Cucurbitales	Cucumber	Cucumis sativus	7	CsHAK7	V	Cucsa.398060.1	MADAAEFERPDLSCGLASMDSSESRWVFQDDDQSEIDDYDDDDDPHDNAARHSMDLESEDEDNVEQKLIRTGPRIDSFDVEALDVPGAHRNEYEDFSVGKKIALAFQTLGVVFGDVGTSPLYTFSVMFNKVPINGDEDIIGALSLVIYTLILISLVKYVLVVLLANDDGEGGTFALYSLICRHAKVSLLPNQLPSDTRISSFRLKVPSAELERSLKIKEKLEASLTLKKLLLMLVLAGTAMVIADGVVTPAMSVMSAVGGLKIGVDAINQDEAVMISVACLIVLFSVQKYGTSKVGLAVGPALFIWFCTLAGIGIYNLVVYDSSVLKAFNPVHIYYFFKRNSTNAWYCLGGCLLCATGSEAMFADLCYFSVRSIQLTFVFLVLPCLFLGYLGQAAYLIS…
12	220	Dicotyledons	Cucurbitales	Cucumber	Cucumis sativus	8	CsHAK8	II:c	Cucsa.285930.1	MVMDLESGVVNEKNAKKDSWKTILMMAYQSLGVVYGELGTSPLYVYRNTFAEEDINHTKSNDEIYGVLSFVFWTLTIVPLLKYIFIVLKADDNGEGGTFALYSLLCRHARVSSLPNTQLADSELTEYKMNVLGPPSQQSFGFKLKSALEKRRVLQKFLLVLALIGTCMVIGDGILTPAISVLSAVSGLEHTMAREHHQYIVIPIACIVLICLFALQHYGTHRIGFLFAPIVIVWLLCISVIGLYNIIHWNPRVYRAISPRYMFQFLKKTQKGGWMSLGGIMLCITGSEAMFADLGHFSQLSIKIAFTFMVYPSLLLAYMGQAAYLSQHHPSSNEHPIGFYVSVPDKLKWPVLIIAVLAAVVGSQAIITGTFSIIKQCSALGCFPRVKIIHTSSKVHGQI…
12	221	Dicotyledons	Cucurbitales	Cucumber	Cucumis sativus	9	CsHAK9	I:a	Cucsa.095870.1	MAEEKVGDEGTKKLKGRKSSWATLRRVDSLNLEAGRVPATATHRLPTVNWQRTLSLAFQSVGVVYGDIGTSPLYVYASTFSSGNIENTDDVIGVLSLIIYTIALIPLLKYVFIVLWANDNGDGGTFALYSLLCRYVKVGLIPNEQPEDRELSNYQLVVPSNLRRSQKVKEKLENSMFAKIVLFLVTIAGTSMVIGDGVLTPSISVLSAVSGISSLGTDAVVGISVAILVILFCIQRFGTDKVGFSFAPIIFTWFAFIGGIGLFNLFKHDPSVLKAFNPKYIFDYFKRNGKEAWVSLGGVFLCITGTEAMFADLGHFNVRAIQISFSSIVFPALLAAYSGQAAYLRKFPDHVAHTFYDSIPDPLYWPTFVVAVAASIIASQAMISGAFAIISQSLSLGCF…
12	222	Dicotyledons	Cucurbitales	Cucumber	Cucumis sativus	10	CsHAK10	II:c	Cucsa.159010.1	MLLVLALIGTCMVIGDGVLTPAISVFSAVSGLELSMAKEHHQYIEVPLACGILVFLFALQHYGTHQVGFLFAPVVIVWLLCISAIGLYNIFYWNPLVYKALSPYYMYKFLKKTKKQGWMALGGILLCITGSEAMFADLGHFSQFSIKLAFTFAVYPSLVLAYMGQAAYLSKHHNLDNEYRIGFYVSVPEKVRWPVLAIAILAAVVGSQAIITGTFSIIKQCSALGCFPRVKIIHTSSKIHGQIYIPLINWILMILCLAVTIGFRDTKRLGNAAGLAVITVMLVSTCLMSLVIVLCWHKSVLLAIAFILFFGSIEALYFSASLIKFFEGAWVPIALSMTFLVVMYVWHYGTVKKYEADVENKVPINWLLGIGPKIGIVRVRGIGLVHTELVSGIPAIFSH…
12	223	Dicotyledons	Cucurbitales	Cucumber	Cucumis sativus	11	CsHAK11	II:b	Cucsa.151680.1	MNNPSQESVETEGISPKKVKNGSYRSVLMLAYQSLGVVYGDLSTSPLYVYKTTFSGKLSLHENDEEIYGVLSFIFWTFTLIALFKYVFIVMSADDNGEGGTFALYSLLCRHARLCILPNQEPIDDQLSAYDIKGISETRSSAALKSFFRLHPSFRRGFLLFVLFGTCMAIGDGVLTPAISVLSAVSGVKHKITGLHDNYIVLISCVLLVGLFSLQHRGTHKVAFMFAPIITAWLVCISVIGMYNIIKWNPSIYHALSPVYMLKFLQSTGVEGWISLGGVVLSITGVEAMFADLGHFSSLSIKIAFTLFVYPSLILAYLGEAAFLSKHHEDIQRSFYRAIPGKKLVILRDHIFISLSQYDITLFVNVEAVFWPVFVVATFASVIGSQAVISATFSLVNQC…
12	224	Dicotyledons	Cucurbitales	Cucumber	Cucumis sativus	12	CsHAK12	I:b	Cucsa.025390.1	MNILSFPKLRRSDSLDIESNNLDGHRGNRAAVGWWVTLQLAFQSIGIVYGDIGTSPLYVFQSSFPAGIKHKDDVLGVLSLIYYTLTLIPLVKYVFIVLQANDNGDGGTFAMYSLLCRYAKVGLIPNQQAEDKEVSNYQLDIPNNRVRRASWLKSQLENRRFAKLFLLFATMLGTSMVIGDGVLTPCISVLSAVGGIKTALSSITQDTIVGISAGILVCLFMAQRFGTDKVGYTFAPIICIWFIFIASIGFYNFVNYDPSVISALNPKYIIDYFRRNKTQAWISLGGIVLSITGTEALFADVGHFSVRSIQISMCIVTYPALLLSYTGQASYLRIHIDDVGDAFFKSIPDPLYYPMFVVAVLSAIIASQAMISGTFSIIQQSLSLGCFPRVKIVHTSSKY…
12	225	Dicotyledons	Cucurbitales	Cucumber	Cucumis sativus	13	CsHAK13	I:b	Cucsa.097280.1	MAHRLSGDIPDMSSSDAIVKEENEEVVVGPSERKSSRQKLRRYDSLDLESRKLHGHDHDHSYAKENNWSVILHLAFQSIGIVYGDIGTSPLYVFSSTFPDGIKHNDDILGVLSLIIYTITLIPVIKYVFIVLKANDNGEGGTFALYSLICRYAKVGLIPNAEVEDREVSNYQLSLPNEREKRASRIQSKLEKSHFAKVFLLFATMLGTSMVIGDGVLTPCISVLSAVGGIKEATPAMTEERIVWASVGILVCLFMVQRFGTDKVGYTFAPIIFIWFALNASIGVYNFIKYDPTVLKALNPNYIFRFFQRNKMDAWISLGGVVLAITGTEALFADVGHFSVRSIQLSMSAITYPALICAYVGQASFLRKHNDLVSDTFYKSIPGKLYWPMFVVAVSASII…
12	226	Dicotyledons	Cucurbitales	Cucumber	Cucumis sativus	14	CsHAK14	I:b	Cucsa.025410.1	MSSYSDKSKTATTTASWGVILHLAFQSLGIVYGDIGTSPLYVYSSTFPLGIIKHKDDILGVLSLIFYTLTLIPLLKYVFFVLQANDNGEGGTFALYSLLCRYAKIGLIPTQQAEDQEVSNFQLQLPSNRLKMASSLKSKLENSRSAKMFLLFATMLGTSMVMGDGVLTPSISVLSAVGGIKNATSSMTQDRIVWISAVILVLLFTVQRFGTHKVGYSFAPIICIWFTLNCGIGVYNFFKFDPSVIKAINPKYIFDYFKRNKKDAWISLGGVVMCVTGTEALFADVGHFSVTSIRLSMCCIAYPALVSAYFGQASFLRKHTDQVANTFYSSIPGPLYWPMFIVAVLASIVASQAMISGTFSIIQQSLSYGCFPRVKVVHTSSKHEGQVYIPEVNYFLMFA…
12	227	Dicotyledons	Cucurbitales	Cucumber	Cucumis sativus	15	CsHAK15	I:b	Cucsa.025380.1	MEVDRTTDNDRFPDFQESSYESSPNLPERKLRRNDSLDVESRTVPGAAGVHGHKAVGAAAATASWGVILHLAFQSVGIVYGDIGTSPLYVYASTFIDGIKHKDDILGVLSLILYTLTLIPLVKYVFLVLQANDNGEGGTFALYSLLCRYAKVGLIPSEQVEDQEVSNFQLELPNNRVKMASCLKSKLENSRAAKIFLLFATMLGTSMVIGDGVLTPSISVLSAVGGIKNATSTMTQDKIVWISAAILVCLFMVQRFGTHKVGYSFAPIICIWFALIGGIGFYNFLKFDPSVIKANKKDAWISLGGVVLAITGTEALFADVGHFTVMSIRLSMCGVAYPALVSAYVGQAAFLRKHTDLVSDTFFSSIPGPLYWPMFVVAVLASIVASQAMISGTFSIIQQ…
13	228	Dicotyledons	Cucurbitales	Melon	Cucumis melo	1	CmHAK1	I:a	MELO3C017828P1	MGEEKVGEEGTKKLKGRKSSWATLRRVDSLNLEAGRVPATAAHRLPTVNWQRTLSLAFQSVGVVYGDIGTSPLYVYASTFSNGIENTDDVIGVLSLIIYTIALIPLLKYVFIVLWANDNGDGGTFALYSLLCRYVKVGLIPNEQPEDRELSNYQLVLPSNLRRSQKVKEKLENSMFAKIVLFLVTIAGTSMVIGDGVLTPSISVLSAVSGISSLGTDAVVGISIAILVILFCIQRFGTDKVGFSFAPIIFTWFAFIGGIGLFNLFKHDPSVLKAFNPKYIFDYFKRNGKEAWVSLGGVFLCITGTEAMFADLGHFNVRAIQISFSSIVFPALLAAYSGQAAYLRKFPDHVGNTFYDSVPDSLYWPTFVVAVAASIIASQAMISGAFAIISQSLALGCFP…
13	229	Dicotyledons	Cucurbitales	Melon	Cucumis melo	2	CmHAK2	I:b	MELO3C016040P1	MAREVEITDDLKVLSLPKLRRFDSLDIESNNLDGHRGNRAAAGWWVTLQLAFQSIGIVYGDIGTSPLYVFQSSFPVGIKHKDDVLGVLSLIYYTLTLIPLVKYVFIVLQANDNGDGGTFAMYSLLCRYAKVGLIPSQQAEDEEVSNYELDIPNNRVRRASWLKSQLENRRSAKLFLLFATMLGTSMVIGDGVLTPCISVLSAVGGIRIAISSITQDTIVGISAGILVCLFMAQRFGTDKVGYTFAPIICIWFIFIAAIGFYNFVNYDPSVVTALNPKYIIDYFRRNKTEAWISLGGIVLSITGTEALFADVGHFSVRSIQISMCAVTYPALLLAYTGQASYLRIHIDDVGDTFFKSIPDPLYYPMFVVAVLSTIIASQAMISGTFSIIQQSLSLGCFPR…
13	230	Dicotyledons	Cucurbitales	Melon	Cucumis melo	3	CmHAK3	I:b	MELO3C016041P1	MEVDPTTDNNRFPDFQESSYESSPNLPERKLRRNDSLDVESRTVPGAAGAHGHKAAGTAAATASWGVILHLAFQSVGIVYGDIGTSPLYVYASTFIDGIKHNDDILGVLSLILYTLTLIPLVKYVFFVLQANDNGEGGTFALYSLLCRYAKIGLIPSEQVEDQEVSNFQLELPNNRLKMASCLKSKLENSRAAKIFLLFATMLGTSMVIGDGVLTPSISVLSAVGGIKNATSTMTQDKIVWISAAILVCLFMVQRFGTHKVGYSFAPIICIWFALIGGIGFYNFLKFDPSVIKAVNPKYIFDYFKRNKKDAWISLGGVVLAITGTEALFADVGHFTVMSIRLSMCCVAYPALVSAYVGQAAFLRKHNDLVSDTFFSSIPGPLYWPMFVVAVLASIVASQ…
13	231	Dicotyledons	Cucurbitales	Melon	Cucumis melo	4	CmHAK4	I:b	MELO3C017974P1	MSSSDAIVKEEDEEVVVGPSSSTSERKPSWQKLRRYDSLDLESRKLHGHDDDHSYAKENNWSVILHLAFQSIGIVYGDIGTSPLYVFSSTFPGGIKHNDDILGVLSLIIYTITLIPVIKYVFIVLKANDNGEGGTFALYSLICRYAKVGLIPNAEVEDREVSNYQLSLPNEREKRASRIQSKLEKSHFAKVFLLFATMLGTSMVIGDGVLTPCISVLSAMGGIKEATPAMTEERIVWASVGILVCLFMVQRFGTDKVGYTFAPIIFVWFALNASIGVYNFIKYDPAVLKALNPNYIIQFFQRNKMDAWISLGGVVLAITGTEALFADVGHFSVRSIQLSMSAITYPALICAYVGQASFLRKHNDLVSDTFYKSIPGGLYWPMFVVAVSASIIASQAMIS…
13	232	Dicotyledons	Cucurbitales	Melon	Cucumis melo	5	CmHAK5	V	MELO3C026470P1	MEDGDRIEEGSSRLLQGSSLTGSSNDYRWVDGSEVDSELPPWSIFEDRESVEASGSIRRRLIKKPKRVDSFDVEAMEIAGANPHHLKDVSIWQTIAIAFQTLGVVYGDMGTSPLYVFADVFTKVHIEEDVDVLGALSLVIYTIALIPLAKYVFVVLRANDNGEGGTFALYSLICRYAKVNLLPNRQPADEHISSFKLKLPTPELERALNIKEILEKRSSLKTLILLLVLMGTSMVIGDGILTPAISVMSAVSGLQGQIKSFDTNAVVIVSIIILVALFSIQKFGTGKVGFLFAPVLALWFFSLGSIGIYNVVKYDLTVVRALNPTYIYLFFKKNSNSAWSALGGCVLCVTGAEAMFADLGHFTVPAIQIAFTFVVFPCLLLAYMGQAAYLMKHPDSAAR…
13	233	Dicotyledons	Cucurbitales	Melon	Cucumis melo	6	CmHAK6	III	MELO3C002408P1	MASGFETGDYTNDKDNSIWVLDRQIDQSMEEESKRLRNVHQEKDHSVYKILQFAFQSLGIVYGDLGTSPLYVFYNTFPDGVENTEDLIGALSLIIYSLTLITLIKYVFIVCKANDNGQGGTFALYSLLSRHAKILTIPNHDLSDEKLTTYSCSVFREQSFAAKTKRWLEGHHVKKHAILILVLVGSCMVIGDGILTPAISDVAVLVAIVILIFLFSMQRYGTDKVGWLFAPVVFLWFILIGGIGIFNICKYDYTVLRALSPVHIYRYFKRGGKDGWTSLGGIMLCITGTEALFADLSHFPASSIQIAFTVVVFPCLLLAYTGQVAYLMKHPHYVVGAFYHSIPESIYWPVFLVATTAAIVASQATISATFSVVKQALALGCFPRVKVVHTSMMFPNQIY…
13	234	Dicotyledons	Cucurbitales	Melon	Cucumis melo	7	CmHAK7	III	MELO3C002409P1	MTSRVETDDDCEMKGSMWVLDQKLDQPMDEEAGRLSNMYKEKKFSVLLLLRLAYQSLGVVYGDLGTSPLYVFYNTFPRGISDPEDVVGALSLIIYSLTLIPLIKYVFIVCKANDNGQGGTFALYSLLCRHAKVKTIPNQHRTDEELTTYSRSKFHEQSFAAKTKRWLEKQSSRKNALLILVLVGTSMVVGDGILTPAISVLSAAGGIKVNHPHVSSDVVVLVAVVILVGLFSLQRYGTDRVGWLFAPVVLLWFLLIGGIGMFNIWKYDKTILRAFSPVYIVRYFRRRGMDGWTSLGGVLLSITGTEALFADLAHFRVAAVQIAFTVVVFPCLLLAYSGQAAYLMNNTDHVVDAFYRSIPESIYWPVFVVATAAAVVASQATISATFSIIKQALAHGCFP…
13	235	Dicotyledons	Cucurbitales	Melon	Cucumis melo	8	CmHAK8	II:c	MELO3C020132P1	MDLEHGKCWDSSKKDSWKTVLVLAYQSLGVVYGDLSISPLYVYRSTFAEDIQHSDTNEEIYGVLSFVFWTLTLVPLFKYVFVVLRADDNGEGGTFALYSLICRHAKVSLLPNRQVADEALSTYLLEHPPEKKKHSKVKLLLEKHRALHTALLILVLLGTCMVIGDGLLTPAISVFSAVSGLELSMTKAHHQYAVVPITCFILVCLFALQHYGTHRVGFVFAPIVLAWLLCISTLGIYNIIHWNPHVYEALSPYYMFKFLEKTRKSGWMSLGGILLCITGSEAMFADLGHFSYTAIQIAFTFLVYPALILAYMGQAAYLSQHHHTTKSIGFYVSVPESVRWPVLTIAILASVVGSQAIISGTFSIINQSQSLGCFPRVKVVHTSDKIHGQIYIPEINWIL…
13	236	Dicotyledons	Cucurbitales	Melon	Cucumis melo	9	CmHAK9	II:c	MELO3C009941P1	MDLESAIGGHPIKKDSWRAVLTLAYQSLGVVYGDLSTSPLYVYKSTFAEDIQHSETNEEIYGVLSFVFWTLTLIPLIKYVFIVLRADDNGEGGTFALYSLLCRHARVSSLPNCQLADEDLSEYTKDGVDLTNKKTCGSRLKSTLEKHRVLQRVLLVLALIGACMVIGDGVLTPSISVFSAVSGLELSMAKPHHRYVEVPVACAILVILFAIQHYGTHRVGFLFAPVVITWLLCISAIGLYNIFYWNPHVYRALSPYYMYKFLKKTQRGGWMSLGGILLCMTGSEAMFADLGHFSQLSIKIAFSFVVYPSLVLAYMGQAAYLSQHHGEESNYRIGFYASVPEKLRLPVLVIAILAAVVGSQAVITGTFSIIKQCSSLGCFPRVKIVHTSSKIHGQIYIPE…
13	237	Dicotyledons	Cucurbitales	Melon	Cucumis melo	10	CmHAK10	II:a	MELO3C014763P2	MEQGSGFSTTSNPSQLSRACLTRNLILAYQSFGVVYGDLSTSPLYVYSSTFAGKLQKHRTEEVVFGAFSLIFWTFTLIPLLKYVFIVLSADDNGEGGTFALYSLLCRHAKLSLLPNQQAADEELSAYRYGPSSHAVAPSQLKRFLERHKTLRTILLLVVLFGACMVIGDGVLTPAISVLSSVSGLQVTEAKLTNGTLLLIACAILVGLFALQHCGTHKVAFMFAPIVIIWLLSIFSIGLYNIIHWNPNIIRAISPHYVLKFFRVTGKDGWLSLGGILLAITGTEAMFADLGHFTALSIRIAFALLIYPCLVIQYMGQAAFLSKNLNLFPNSFYDSIPDPVFWPIFVIATLAAIVGSQAVITATFSIVKQCHALGCFPRVKVVHTSKHIYGQIYIPEINW…
13	238	Dicotyledons	Cucurbitales	Melon	Cucumis melo	11	CmHAK11	II:c	MELO3C021533P1	MDTTLFWGRPEKRDSWRTIFTLAYQSLGVVYGDLSTSPLYVYKSTFAENLQHSETNEEVYGVLCFVFWTLTLIPLLKYVFIVLRADDNGEGGTFALYSLLCRHARLSSLPNHQLADEELSAYTIDRPQTENSSNFSFSSCLKSTLEKCKVLQKMLLVLALIGTCMVIGDGVLTPAISVFSAVSGLELSMAKEHHQYIEVPLACGILVFLFALQHYGTHQVGFLFAPVVIVWLLCISAIGLYNIFYWNPLVYKALSPYYMYKFLKKTKKQGWMALGGILLCITGSEAMFADLGHFSQFSIKLAFTFAVYPSLVLAYMGQAAYLSKHHNLDNEYRIGFYVSVPEKVRWPVLAIAILAAVVGSQAIITGTFSIIKQCSALGCFPRVKIIHTSSKIHGQIYIP…
13	239	Dicotyledons	Cucurbitales	Melon	Cucumis melo	12	CmHAK12	II:b	MELO3C020532P4	MLKAYRFGLSCFSNDSMNNPSQESVETEGISPKVKNGSYRSVLILAYQSLGIVYGDLSTSPLYVYKTTFSGKLSLHENDEEIYGVLSFIFWTFTLIALFKYVFIVMSADDNGEGGTFALYSLLCRHARLCILPNQEPMDDKLSAYDIKGILETRSSAALKSFFRLHPSFRRGFLLFVLFGTCMAIGDGVLTPAISVLSAVSGVKHKIPGLHENYIVLISCVILVGLFSLQHRGTHKVAFMFAPIIMAWLVCISVIGIYNIIKWNPSIYHALSPVYMLKFLRSTGVEGWISLGGVVLSITGVEAMFADLGHFSSLSIKIAFTFLVYPSLILAYLGEAAFLSKHHEDIQRSFYKAIPEAVFWPVFVVATFASVIGSQAVISATFSLVNQCCALNCFPHVKT…
13	240	Dicotyledons	Cucurbitales	Melon	Cucumis melo	13	CmHAK13	II:c	MELO3C012009P1	MVMDLESGVVSEKNAKKDSWKTILMMAYQSLGVVYGELGTSPLYVYRNTFAEEDISHSKSNDEIYGVLSFVFWTLTIVPLLKYIFIVLKADDNGEGGTFALYSLLCRHARVSSLPNTQLADSELTEYKMNVLGPSSQQSFGFKLKSALEKRRVLQKFLLVLALIGTCMVIGDGILTPAISVLSAVSGLEHTMAKEHHQYIVIPIACVVLICLFALQHYGTHRIGFLFAPIVIVWLLCISVIGLYNIIHWNPRVYRAISPRYMFQFLKKTQKRRLDVTWWNNVVHYCKVIRLLITYGYVHIFKGSEAMFADLGHFSQLSIKIAFTFMVYPSLLLAYMGQAAYLSQHHPSSNEHPIGFYVSVPDKLKWPVLIIAVLAAVVGSQAIITGTFSIIKQCSALGC…
13	241	Dicotyledons	Cucurbitales	Melon	Cucumis melo	14	CmHAK14	I:b	MELO3C016037P1	MAPMVATTTGSWGVILHLAFQSLGIVYSDIRTSPLYVYSSTFPSGIIKHKDDILGVLSLIFYTLTLIPLLKYVFFVLQANDNGEGGTFALYSLLCRYAKIGLIPSQQAEKIKRYQIFNYIFPPIVLKWPLLLNLNSKTTAPAKMFLLFATMLGTSMVIGDGVLSPSSPVLHNYTHLIKGCLNLNLLVAVLSTVGGIKNATPSMTQDLEPIKLDIFLCSSIICIWFTLNCGIGVYNFLKFDPSVIKAVNPKYIFDYFKRNKKDAWISLGGVVMCITETEALFSDVGHFCVTSIRLSMCCVAYPTLVSAYFDQASFLRKHGDQVANISYNSIPSVFKSPMFVVAVLASIGASQAMISGTFSIIQQSLSNGCFPRVKVVHTSSKHEGQVYIPEVNYFLMFAC…
13	242	Dicotyledons	Cucurbitales	Melon	Cucumis melo	15	CmHAK15	V	MELO3C019015P1	MEIFKLPYFIFYQLPGSEAMFADLCYFSVRSIQLTFVFLVLPCLFLGYLGQAAYLISNQNGAEHVFFNSVPKSAFWPVFLIANVAALIASRAMTTATFSCIKQSTALGCFPRLKIIHTSRKFMGQIYIPVLNWFLLAVCLVVVCSISSMYEIGNAYGIAELGVMMMTTVLVTIVMLLIWQINIIIVMGFAMIFLGIELIFFSSVLWGVGDGSWIILVFAVIMFFIMSIWNYGSKLKYETEVKQKLSMDLMRELGCNLGTIRAPGIGLLYNELVKGIPAIFGHFLTTLPAVHSMIIFVCIKYVPVPVVPQSERFLFRRVCPKSYHIFRCIARYGYKDVRKENHQTFEQLLIESLEKFIRREAQERSLESDGDDDTDTDETRCSRLLVGPNGSVYSLGIPL…
14	243	Dicotyledons	Malpighiales	Poplar	Populus trichocarpa	1	PtHAK19	III	POPTR_0001s00580	MATGGKSNEEIDYKSRIWVLDQNLDQPMDAEAEKLRNKYQDKKFSRLLLMQLAFQSLGVVYGDLGTSPLYVFYNTFPDGIEDPEDLIGALSLIIYSLTLIPLLKYVLIVCRANDNGQGGTFALYSLLCRHAKVKTIPNQDHTDEQLTTYSRSTFHEKSFAGKTKRWLEEHPFRKNALLVLVLVGSSMVIGDGILTPAISVLSAVQGIKLDHPKMSSDVVVLVAVVILVGLFSMQHHGVDRVSWLFAPIVLLWFLLIGGIGLFNIWKYDTGVLKAISPVYIYRYFRRGGRDSWLSLGGIMLSITGTEALFADLSHFPVPSIQIAFTTVVFPCLLLAYSGQAAYLMKNTNHVVDAFYSSIPDSIYWPVLLVATAAAVVASQATICATFSLIKQALALGCFP…
14	244	Dicotyledons	Malpighiales	Poplar	Populus trichocarpa	2	PtHAK1	III	POPTR_0001s00590	MELSMGMTSRVEVEEDSDNNKGSMWDLDQKLDQPMDEEAGRLRNTYREKKFSALLLLRLAFQSLGVVYGDLGTSPLYVFYNTFPHGIKDSEDVIGALSLIIYSLTLIPLLKYVFIVCRANDNGQGGTFALYSLLCRHANVRTIPNQHRTDEELTTYSRSTFHEQSFAAKTKRWLERYAFRKNALLILVLVGTCMVIGDGILTPAISVLSASGGIKVNHPKLSNDVVTVVAVVILVGLFSMQHYGTDKVGWLFAPIVLLWFLLIGGIGLFNIWKYDTGVLKAFSPVYIYRYFRRGGRDGWTSLGGIMLSITGIEALFADLAHFPVLAVQIAFTVVVFPCLLLAYSGQAAYLMQNKEHVVDAFYRSIPESIYWPVFIVATAAAVVASQATISATFSIIKQA…
14	245	Dicotyledons	Malpighiales	Poplar	Populus trichocarpa	3	PtHAK4	I:a	POPTR_0001s03680	MSEQELERNQVQMEEETNVENKLNGRKISWGNLRRVDSLNLEAGRVSMSHSHGAHTSKTDWKRTLSLAFQTIGVVYGDIGTSPLYVYASTFTEGINHDQDILGVLSLIIYTILLVPMLKYVFIVLRANDNGDGGTFALYSLICRSAKVSLIPNDQPEDHQLSNYRLDTPSNQLRRAHMIKEKMESSKTIKIILFLITILGTSMVIGDGVLTPCISVLSAVSGIKSLGKDAVVGISIAILIVLFSVQRLGTDKVGFAFAPVILLWFSFITGIGLYNLFKYEIGVLRAFNPKYMIDYFKRNGKQGWISLGGIVLCITGTEAMFADLGHFNVRAIQISFSSIVFPALVAAYSGQAAYLTKFKVDVSDTFYKSIPDPLYWPTFVIAVAAAIIASQAMISGAFA…
14	246	Dicotyledons	Malpighiales	Poplar	Populus trichocarpa	4	PtHAK22	I:a	POPTR_0001s12780	MESSKTIKIILFLVTILGTSMVIGDGVLTPCISVLSAVSGIKSLGEDTVVGVSIAILIVLFTLQRLGTDKVGFAFAPVIFLWFSFIGGIGLFNLFKYDLGVLRAFNPKYIIDYFKRNGKQGWISLGGVVLCITGTEAMFADLGHFSVRAIQTSFSSIVFPALLAAYAGQAAYLSKFPNDVSDTFYKSVPDPLYWPMFVVAVAAAIIASQAMISGAFSIVAQSLSLNCFPRVKIVHTSAKYEGQVYIPEINYMLMVACVIVTLAFRTTEKIGHAYGIAVVAVMVMTTCMVTLIMLVIWKARMLSVTLFFFVFGAIEVVYLSAVLYKFKQGGYLPLALSFFLMVAMGTWHYVHRERYLYELKNKVSSEYIMQLAANANMNQLPGIGLLYSELVQGIPPIFP…
14	247	Dicotyledons	Malpighiales	Poplar	Populus trichocarpa	5	PtHAK20	I:a	POPTR_0001s12790	MSEQELIEEETKVENKLKGRKISWGNLRRVDSLNLEAGRVSMSHSHGAHTSKTDWKRTLSLAFQSIGIVYGDIGTSPLYVYASTFTEGINHDEDILGVLSLIIYTIVLVPMLKYVFIVLRANDNGDGGTFALYSLICRSAKVSLIPNDQPEDHQLSNYRLDTPSNQLRRAHMIKEKMESSKTIKIILFLITILGTSMVIGDGVLTPCISVLSAVSGIKSLGKDAVVGISIAILIVLFSVQRLGTDKVGFAFAPVILLWFSFITGIGLYNLFKYEIGVLRAFNPKYMIDYFKRNGKQGWISLGGIVLCITGTEAMFADLGHFNVRAIQISFSSIVFPALVAAYSGQAAYLTKFKDDVSDTFYKSIPDPLYWPTFVIAVAAAIIASQAMISGAFAIISQSL…
14	248	Dicotyledons	Malpighiales	Poplar	Populus trichocarpa	6	PtHAK23		POPTR_0001s15000/POPTR_0001s15010	not included
14	249	Dicotyledons	Malpighiales	Poplar	Populus trichocarpa	7	PtHAK10	V	POPTR_0001s21310	MAEENGVGRSEINGRFASNDSMELRWVFQDDDDDDDDDSVMDDDNGNDNSRQRHGGGLESDEEDEEDTGEQRLFRTGPLIDSFDVEALEIPSAHRNDNYYEELGVGRRIILAFQTLGVVFGDVGTSPLYTFGVMFTKAPINGEEDVVGALSLVLYTLILIPLLKYVLVVLWANDDGEGGTFALYSLICRHAKVNLLPNQLPSDARISSFRLKVPSPELERSLKIKERLETSVTLKRLLLMLVLAGTSMLIADGVVTPAMSVMSAVGGLKVGVAAIEQEHVVMISVAFLVILFSVQKFGTSKVGLVVGPALFLWFCSLAAIGIYNLVKYDSSVLRAFNPVHIYYFFKRNSTKAWRALGGCLLCATGSEAMFADLCYFSVRSVQLTFVFLVLPCLLLGYLG…
14	250	Dicotyledons	Malpighiales	Poplar	Populus trichocarpa	8	PtHAK2	II:a	POPTR_0002s23850	MEAQSGVQRSPNPSHLSWVTLSRNLLLAYQSFGVVYGDLSTSPLYVYTNIFAGRMQNHQTEEVIFGAFSLVFWTFTLIPLIKYVCIVLSADDNGEGGTFALYSLLCRHAKLSLLPNQQAADEELSSYKYGPSTQAMASSPLKRFLEKHKRLRTALLIVVLFGASMVIGDGVLTPAISVLSAVSGLQEANNKLTNGELVLLACVILVGLFALQHCGTHKVAFMFAPIVIIWLVSILSIGLYNIVHWNPKIVHALSPHYIIKFFNHTGKEGWISLGGVLLSITGTEAMFADLGHFTALSIRLAFALVIYPCLVVQYMGQAAFLSINPKSIPNSFYDSIPDKLFWPLCIIATLAAIVGSQAVITATFSIVKQCHALGCFPRVKVVHTSKHIYGQIYIPEINW…
14	251	Dicotyledons	Malpighiales	Poplar	Populus trichocarpa	9	PtHAK5	V	POPTR_0003s01820	MEHYSDDLAEHAFYSSVPSGFFWPVFLVANLAALIASRAMTTATFSCIKQSTALGCFPRLKIIHTSRKFMGQIYIPVINWFLLVVCLVLVCSISSITEIGNAYGIAELGVMMTTTILVTIVMLLIWQINIIIVLSFLVIFLGIELVFFSSVLGGVGDGSWIILVFAVVMFFVMLVWNYGSKLKYETEVKKKLSMDLVRELGPNLGTIRAPGIGLIYNELVKGIPAIFGHFLTTLPAIHSMIIFVCIKYVPVPVVPQGERFLFRRVCPKSYHIFRCIARYGYKDVRKENHQAFEQLLIESLEKFIRREAQERSLESDGDDDTDYDDDYSSTRVLIAPNGSVYSLGVPLLGEYKDTSKSISEASTSEEAKIGYPSDSASDAEQSLERELSFIHKAKESGVV…
14	252	Dicotyledons	Malpighiales	Poplar	Populus trichocarpa	10	PtHAK6	III	POPTR_0003s10910	MDEEAGRLRNMYREKKFSALLLLRLAFQSLGVVYGDLGTSPLYVFYNTFPRGINDSEDVIGALSLIIYSLTLIPLLKYVFIVCKANDNGQGGTFALYSLLCRHANVRTIPNQHRTDEELTTYSRSTFNEQSFAAKTKRWLERYAFRRNALLILVLVGTCMLIGDGILTPAISVLSASGGIKVNHPKLSSDVVIVVAVVILVGLFSMQHYGTDKVSWLFAPIVLLWFLLIGGIGVFNIWKYDTGVLKAFSPVHIYRYFRRGGRDSWTSLGGIMLSITGTEALFADLGHFPVSAVQIAFTVVVFPCLLLAYSGQAAYLMQNKEHVVDAFYRSIPDRIYWPVFIVATAAAVVASQATITATFSIIKQALALGCFPRVKVVHTSKKFLGQIYIPDINWILMIL…
14	253	Dicotyledons	Malpighiales	Poplar	Populus trichocarpa	11	PtHAK11	III	POPTR_0003s10920	MASLSIDNEEIGNKGRMWALQQQLDPPMDEEGGGLRNRQQPLLQKPRHDLTIDSNYKRFLNSPSNLNQITCSLHLAGNRDGGEEDSSTLFLLQLAFQSLGVVYGDLGTSPLYVFYNTFPDGIKDPEDVIGALSLIIYSLTLVPLLKYVFIVCRANDNGQGGTFALYSLLCRHAKLKTIPNQDHSDEKLTTYSHSTFHEKSFAAKTKRWLERHTFRKNSLLVLVLVGTCMVIGDGILTPAISVLSAVQGIKLGRPEMSTEIVLVVAVIILVVLFCLQHRGVEKITWIFAPIVLLWFLLIGGIGIYNIIKYDSSALKAFSPLYIYRYFKRGRKESWTSLGGVMLSITGTEALFADLSHFSVASIQIAFTVVVFPCLLSAYSGQAAYLLKNSDNVVDAFYRS…
14	254	Dicotyledons	Malpighiales	Poplar	Populus trichocarpa	12	PtHAK12	II:a	POPTR_0003s13370	MAECKNQRKHVLLLAYQSFGIVFSDLSIPPLYVYKCTFSGRLRHYQNEDTVFGAFSLVFWTLTLFSLFKYVGFMLCANDNGEGGIFALYSVICRHAKFCLLPNQQAADEEISTYHSVGYSYRNVVSSRFKKFVEGHKKMKTALLVLVLFGAAVFITIAIFTPAISILSSVEGLQVRAKNLHHGMLVIIALFLLIGLFVLQHYGMHRVAFIFAPIVILWLLSIAFVGIYNIIKWNPRVYQALSPYYIYKFFGETGKDGWISLGGILLCITGTEVIFAGLGHFTASSIRVAFSFVVYPCLVLQYMGQAAFLSQNFSSVSTSFHSSIPDSLFWPVTVMATLAAIVASQAVVSATFSIAKQCHALGCFPRIKIVHKSKWVHRQTYVPEINWALMILCLAVTVG…
14	255	Dicotyledons	Malpighiales	Poplar	Populus trichocarpa	13	PtHAK17	II:b	POPTR_0003s14800	MELESGSTNRQSRLNEGKFSCTLILAYQSFGVVYGDLSTSPIYVYTSTFSGRLRLHEDDDEILGVLSLVFWTLTLIPLCKYIVFVLGADDNGEGGTFALYSLLCRRAKLGLLHPSHSTDDDISSQDSCQLIKETRASSLLKEFFDKHHSSRVVLLLIVILGTSMVIADGILTPSMSGYAVLITCLILVGLFALQHIGTHRVGFLFAPIILLWLLSISGVGIYNIIQWNPRVVSALSPYYVYKLFKLTGKDGWTSLGGIVLCITGAEAMFADLGHFSQLSIRIAFTAIIYPSLILAYMGEAAYLSKHKEDLQRSFYRAIPEVVFWPVFIIATLATVVASQAVISATFSIISQCWALKCFPRVKIIHTSNQMHGQIYIPEVNWMLMVFCLLVVIGFRDTDM…
14	256	Dicotyledons	Malpighiales	Poplar	Populus trichocarpa	14	PtHAK24	II:b	POPTR_0005s09870	MIIVLGANDNGEGGTFALYSLLCRHSRMGLLKSSHLEHEFVTCCDSNVSTKETRASLVIKEFFNKHRSSRVVLLLVVLLGTSMVIGDGILTPAMSVLSAVYGIQIMAPDLHENYTVAIACVILVGVFALQHCGTHRIGFLFSPILIAWLLCISGVGIYNIFHWNPDVVKALSPYYIYNFFIKTGTAGWSSLGGIVLCATGAEAMFADLGHFSELSVRIAFTGLVYPCLVLAYMGEAAYLSKNRGDLQSSFYKAVPDAIFLPVFIIATLATVVGSQAIISATFSIISQCRALNCFPRVKIVHTSNNIHGQIYIPEVNWVLMILCLAVVVGFRDTATIGNAYGLAVITVMLVTTLLMFLIISTVWNKHVFLAFLFVVIFGFVELSYFDACLAKLHKGGWFP…
14	257	Dicotyledons	Malpighiales	Poplar	Populus trichocarpa	15	PtHAK25	II:b	POPTR_0007s08130	MTCYFYQHNYRRNKFIRSSAVVVSLMSVWHYGESKKQAFELENKVSLDSLLSLGIARVPGICLVCSHVTSGVPPMFAHFVTNFPAFHQILIFVTVQFLMIPKVPVIDRFHVSRIGPPDVPLFRCIVRYGYKDIRDSFEFETQLIEKITVFLKCELNCKEILILEQSVLGAKAQRRKELRLQYLQEASEDVNELMEAKEAGVTFMMGHTCVIAREASCILKKLVINYVYGFLRRNSRCPATSFGIPHSALIEVGMVYRV
14	258	Dicotyledons	Malpighiales	Poplar	Populus trichocarpa	16	PtHAK21	IV	POPTR_0008s14040	MIGGGGGGGEQAGPGQELRAADPAATKREFVVNVESSCSVSHNSNSHLLPPRNSAFFIPPPPPPPPPTTTTTQPKERGRWETVVLAYKTLGVVFGGLVTSPLYVYPSMPLKSPTEQDYLGIYSIMFWTLTLIGVVKYTSIALKADDQGEGGTFALYSLLCRNMNIGILSSKQVQTNSSFSHSVLHEGTENKSRLGIFFERSIVARRALLFIAMLGTCMLIGDGILTPAISVLSAMEGIRAPFPSVSKSSVEALSAVVLVVLFLLQKFGTSRVSFMFSPIMGAWTLCTPLVGIYSIIQHYPSIFKALSPHYIFHFFWRNGKEGWLLLGAGSEALFADLGHFNRSSIQIAFLLTIYPSLVLTYAGQTAYLIKNPNDHDDGFYKFIPTAIYWPIFIIATLAA…
14	259	Dicotyledons	Malpighiales	Poplar	Populus trichocarpa	17	PtHAK13	V	POPTR_0008s14660	MRRRLVKKPNKVNSFDVEAMEIAGAHHHHSKDLSVWKTLAMAFQTLGVVYGDLGTSPLYVFTDVFSKVPIKSEVDILGALSLVIYTISLIPLAKYVFVVLKANDNGEGKRYLFKLITFHLALLLPADENISSFKLKLPTPELERALKIKETLEKRSSLKTLLLLLVLTGTSMVIGDGILTPAMSVMSAVSGLQGEISWFGTNAVVVVSIIILVGLFSIQQFGTGKVGFLFAPVLGLWFFSLGSIGIYNLVKHDISVIRALNPAYIYFFFKKNSGAAWSALGGCVLCITGAEAMFADLGHFCVESIQIAFTCVVFPCLLLAYMGQASYLMKYPDSASRIFYDSIPESLFWPVFVIATLAAMIASQAMISATFSCVKQAMSLGCFPRLKIVHTSRKLMGQI…
14	260	Dicotyledons	Malpighiales	Poplar	Populus trichocarpa	18	PtHAK14	II:c	POPTR_0008s14670	MHACDFKKKNSSTPPFLLVLPKWVIVKWNISTSESSPPSPIMDLETGISQNHVKRESWKTVLTLAYQSLGVVYGDLSTSPLYVYKSTFADDIQHSETNEEIYGVLSFVFWTLTLIPLLKYVFIVLKADDNGEGGTFALYSLLCRHARVNSLPNCQVADEELYEYKKDAAATCLTPKTTFGSRLKSTLEKHRVLQRFLLLLALIGTCMVIGDGVLTPALSVFSAVSGLELSMSREHHKYVEVPVACIILIGLFALQHYGTHRIGFLFAPVVLMWLLCISAIGIYNIIHWNPHVYQALSPYYMYKFLRKTQRGGWMSLGGILLCITGSEAMFADLGHFSQLSIQIAFTSLVYPSLILAYMGQAAYLSQHHAIDSDYRIGFYVSVPDKLRWPVLVIAILAAV…
14	261	Dicotyledons	Malpighiales	Poplar	Populus trichocarpa	19	PtHAK26	II:b	POPTR_0009s07760	MAYSPLQYQHHGTNRVAFLFAPIVTAWLLCISSIGIYNIFRWNRHVFCAISPIYMLKFLKNTGTEGWVSLGGVVLSITGVETMFADLGHFSSSSIKVAFTCVVYPCLILAYMGEAAFLSRHHEDIQRSFYKAIPESVFWPVFIVATFAAVVGSQAVISATFSMISQCCALNCFPRVKIVHTSSKIYGQIYIPEVNWMLMCLCLAVTIGLRDTNMMGHAYGLAVTTVMFVTTCLMALVMIIVWKKKIIIAVAFLLFFGSIEVLYISASVYKVPEGGWIPLVLSLIFMVVMYIWNYGTMKKHQFDVENKVSMNRIVSLGPSLGMVRVPGIGLVYSNLAIGVPAVFGHFVTNLPAFHQVLVFVCVKSVQVPHVSENERLLISRVGPKEYGMFRCIVRYGYKD…
14	262	Dicotyledons	Malpighiales	Poplar	Populus trichocarpa	20	PtHAK3	II:c	POPTR_0010s10440	MDLESGVFQNHVKKESWKTVLTLAYQSLGVVYGDLSTSPLYVYKSTFAEDIQHSETNEEIYGVLSFVFWTLTLVPLLKYVFIVLKADDNGEGGTFALYSLLCRHARINSLPNCQVADEELYEYKKDAANTCLTPTTAFGLRLKSTLEKHRVLQRFLLLLALIGTCMVIGDGVLTPALSVFSAVSGLELSMAKEHHKYVEVPVACTILICLFALQHYGTHRVGFLFAPVVLMWLLCISAIGIYNIIHWNPHVYQALSPYYMYKFLRKTQRGGWMSLGGILLCITGSEAMFADLGHFSQLSIQIAFTSLVYPSLILAYMGQAAYLSQHHVIDNDYHIGFYVSVPGKLRWPVLVIAILAAVVGSQAIITGTFSIIKQCSALGCFPRVKIVHTSSKIHGQIYI…
14	263	Dicotyledons	Malpighiales	Poplar	Populus trichocarpa	21	PtHAK18	V	POPTR_0010s10450	MEGDDDRIEESSVRLVGSSNDGIVDGGGGGVGESRWVDGSEVDSESPPWSLLDENDSSQGYGSMRRRLVKKPKSVDSFDVEAMEIAGAHHHHSKDLSVWQNLALAFQTLGVVYGDLGTSPLYVFTDVFSKVPIRSEVDVLGALSLVIYTIALIPLAKYVFVVLKANDNGEGGTFALYSLICRYAKVNMLPNRQPADENISSYRLKLPTPELERALNIKETLEKRSSLKTVLLLLVLTGTSMVIGDGILTPAMSVMSAVSGLQGEISDFGTSAVVVVSIIILLGIFSIQRFGTGKVGFMFAPVLALWFFSLGAIGIYNLVKHDISVLKALNPAYIYFFFKKNSSAAWSALGGCVLCITGAEAMFADLGHFSVQSIQIAFTCVVFPCLLLAYMGQASYLMK…
14	264	Dicotyledons	Malpighiales	Poplar	Populus trichocarpa	22	PtHAK27	IV	POPTR_0010s11100	MSGGGGEGQGGSGQELRAADSAANKREFVVNVESSSSNRHSLHLRNSAFFIPPPPLTITTGHPEERGRWETVVLAYKTLGVVFGGLVTSPLYVYPSMPLKSPTEQDYLGIYSIMFWTLTLIGVVKYTSIALKADDQGEGGTFALYSLLCRNMNIGILSSKQVQTNSSLSHSVLHGSTENKSRLGIFFERSIVARRVLLFIAMLGTCMLIGDGILTPAISVLSAMDGIRAPFPSVSKSLVEALSAGVLVVLFLLQKFGTSRVSFMFSPIMGGWTLCTPLVGIYSIIQHYPSIFKALSPHYIFRFFWRNGKEGWLLLGGTVLCITGSEALFADLGHFNRSSIQIAFLLTIYPSLVLTYAGQTAYLIKNPNDHDDGFYKFIPTTIYWPIFIIATLAAVVASQ…
14	265	Dicotyledons	Malpighiales	Poplar	Populus trichocarpa	23	PtHAK28	II:c	POPTR_0012s04050	MVTSNVYWLNPHTGMAIVFGMIVTTCMMSLVMALYWEKSLFISGFFLMFFGFVEAVYVSACMLSFHKGAWYLFVLLAVSFTVMLAWHYGTMKKYEFDLQNKVSTEWLTDYSPSLGVSRVPGIGLIYTDIVMGIPAFFSHFITNLPAFHQVLIFVSFKPQPVPCVPPSQRYCVGRVGGKDYRIYRCIVRYGYCDQVRDTDDFEEQIIGSIGEYISLDESDCESLTSPEGRMVIVGTPLLEGHALIPVDDTNLFSGSTNAGNNETLAIPEGELIGRNAPVRRKKVRFLIPESSPRLRVSVRDELQELINARESGTAYFLGQSHLTVRDGSNFFKKFLIMAYVFLDKNCREPPVALNIPHAALVEVGMVYII
14	266	Dicotyledons	Malpighiales	Poplar	Populus trichocarpa	24	PtHAK29	II:c	POPTR_0012s04060	MCSCSKCKGHHETWRHALVLSFQTLGVVYGRLSTAPLYVFGTIQTKDFKSNEIAYEYFSFIFWTLTVVSLLKYAFIVLRADDNGEGGVFALYSLLCRHAKVGLIPNDTSTNEVMQHEEENTFRGKVESRARRAIKNHRSSHYLMLFTALFGACMIIGDGVITPSISVLSASSGLQRSLSEIKYVPVPSACVITVCLFILQHYGSHKIGFMFAPIVTIWLLFIGGVGIYNIFHWNPEIFSALSPVYMYRFVRNINKDRWKSLGSILLCIAGSETMFTDLGHFSKRSIKRTFVCLIYPVLILCYAGQAAFISKHWNGPENFNHLSESIPEHLRHVFILLSLLASAVGSQATITASFSIINQCRALSCFPRVKVIHTSDKRHGQVYIPDVNWLLMALSLSIT…
14	267	Dicotyledons	Malpighiales	Poplar	Populus trichocarpa	25	PtHAK8	II:c	POPTR_0013s08110	MDLGHGKCWDTSKKDSWKTLLLLAYQSLGVVYGDLSTSPLYVYKSTFAEDIQHSDTNEEIFGVLSFVFWTLTLVPLFKYVFVVLRADDNGEGGTFALYSLICRHAKVSLLPNRQVADESLSTYKLENPPEKDSSRVKMYLEKHKALHTALLILVLLGTCMVIGDGLLTPAISVFTAVSGLELSMSSNHHQYAVVPITCFILVCLFTLQHYGTHRVGFLFAPVVLAWLLCISALGLYNIIHWNPHVYQALSPYYMFKFMKKTKKGGWMSLGGILLCITGSEAMFADLGHFSYTAIQIAFTFLVYPALILAYMGQAAYLSQHHDNTNHIGFYISVPGKLRIPVLIIAILASVVGSQAIISGTFSIINQSQSLGCFPRVKVVHTSDKIHGQIYIPEINWMLM…
14	268	Dicotyledons	Malpighiales	Poplar	Populus trichocarpa	26	PtHAK15	I:b	POPTR_0014s12700	MSDEAIKATNEESREEEFSPQLNGKKLSWQKLRRNDSLEMESGKFSGRQVHGSKGASWSVILQLAFQSIGIVYGDIGTSPLYVYASTFTKGINHNDDILGVLSLIFYTLTLIPLIKYVLIVLQANDNGDGGTFALYSLICRYAKVGLLPSQQVEDRDVSNFQLELPSKRLRRASKLKSKLEKSKFAKLFLLFATMLGTSMVIGDGVLTPCISVLSAVGGIKEAASSMTQDSIVWISVAILICLFMVQRFGTDKVGYSFAPVICVWFSLIGGIGIYNLFKYDPAVVKALNPMYIVDYFRRNKKDAWISLGGVVLAITGTEALFADVGHFTVRSIQISMCVVTYPALISAYAGQAAFLRKHNDLVSATFFKSIPDPLYWPMFVVAVMASIIASQAMISGTF…
14	269	Dicotyledons	Malpighiales	Poplar	Populus trichocarpa	27	PtHAK7	II:a	POPTR_0014s14180	MEAGAGIHRSSNPSQFSWLILSRNLLLAYQSFGVVYGDLSTSPLYVYTNTFAGKMQKHQTEEVIFGAFSLIFWTFTLIPLIKYVCILLSADDNGEGGTFALYSLLCRHAKLSLLPNQQAADEELSAYKYGPSTQAIASSPLKRFLEKHRRLRTALLVVVLFGACMVIGDGVLTPAISVLSAVSGLQVADSKLTKGELVLLACVILVGLFALQHCGTHKVAFMFAPIVIIWLVSILSIGLYNIIHWNPRIVRALSPHYIIKFFSQTGKDGWISLGGVLLSITGTEAMFADLGHFTALSIRLAFALAIYPCLVVQYMGQAAFLSKHPNSMSNSFYDSIPDRVFWPVCVIATLAAIVGSQAVITATFSIVKQCHALGCFPRVKVVHTSKHIYGQIYIPEINW…
14	270	Dicotyledons	Malpighiales	Poplar	Populus trichocarpa	28	PtHAK9	II:c	POPTR_0015s05040	MDPPLSPTAFSDGLKKETWRHSLILSFQTLGVVYGRLSTAPLYVFGTIQTTDFKSNETAYEYFSFIFWTLTVVSLLKYAFIVLRADDNGEGGVFALYSLLCRHAKVGLLPNDRSTKEVMQHEEVSTLRGKVESRARKAIRNHRSSHYLMLFTALFGACMIIGDAVITPSISDVPVPSACVITVGLFILQYYGTHKIGFMFAPIVTIWLLFISGVGIYNVFRWDPKIFSAISPAYMYRFVRKINKASWKSLNSILLCIAGSETMFTDLGHFSKRSIKITFVCLIYPVLVLCYAGQAAFISKHWNGTENFNHLSESVPKHLRHVFILVSLLASAVGSQATITASFSIINQCLALGCFPRVKVIHTSDKRLGQVYIPDVNWLLMALSLSVTIGFHDITRIAN…
14	271	Dicotyledons	Malpighiales	Poplar	Populus trichocarpa	29	PtHAK16	II:c	POPTR_0019s08430	MDLGHGKCWDTSKKDSWKTLFLLAYQSLGVVYGDLSTSPLYVYKSTFAEDIQHSDTNEEIFGVLSFVFWTLTLVPLFKYVFVVLRADDNGEGGTFALYSLICRHAKVSLLPNRQVADEALSTYKLENAPEKKNSSRVKMYLEKHKCLHTALLILVLLGTCMVIGDGVLTPAISVFSAVSGLELSMSNNHHQYAVVPITCFILVCLFALQHYGTHRVGFLFAPVVLAWLLCISALGLYNIIHWNPHVYQALSPYYMFKFLKKTKKGGWMSLGGILLCITGSEAMFADLGHFSYAAIQIAFTFLVYPALILAYMGQAAYLSQHHDNTNHIGFYISVPEKLRIPVLIIAILASVVGSQAIISGTFSIINQSQSLGCFPRVKVVHTSDKIHGQIYIPEINWML…
14	272	Dicotyledons	Malpighiales	Poplar	Populus trichocarpa	30	PtHAK30		POPTR_0327s00200/POPTR_0327s00210	not included
14	273	Dicotyledons	Malpighiales	Poplar	Populus trichocarpa	31	PtHAK31	II:c	POPTR_0583s00210	MFADLGHFSYAAIQIAFTFLVYPALILAYMGQAAYLSQHHDNTNHIGFYISVPEKLRIPVLIIAILASVVGSQAIISGTFSIINQSQSLGCFPRVKVVHTSDKIHGQIYIPEINWMLMILCVAVTIGFRDTKHMGNASGLAVMTVMLVTTCLTSLVIILCWHKPPIVALSFLLFFGSVELLYFSASLTKFTEGAWLPILLALILMSIMFIWHYATIKKYEFDLHNKVSLEWLLALGSSLGIARVPGIGLVFTDLTSGIPANFSRFVTNLPAFHRVLVFVCVKSVPVPYVPPAERYLVGRVGPPAHRSYRCIVRYGYRDVHQDVDSFETELAARLADFINYDWHRTHGTYSFPEDNASLSNESSTECRLAVIGTVSFSSIPAYEVEESVQPASVSGGFPT…
15	274	Dicotyledons	Malpighiales	Willow	Salix purpurea	1	SpHAK1	II:b	>SapurV1A.0042s0410 peptide: SapurV1A.0042s0410.1.p (PAC:31397792)	MHFATSLVHTQHLPLHHLPLPLSLHSLLSLYSLNLFYSFSLSKSQSCWPFLSHTRRQKTMNPSAEFVEQGMSPQNVKRASCMSVITLAYQSLGVVYGDLSTSPLYVYKTTFSGKLSLHEDDEEIYGVLSFIFWTFTLIALVKYIFFVMSADDNGEGGTFALYSLLCRHAKLSILPNQQATDEKLSTYATEASADTWQSSALKSFFEKHPRFHKVLLIFVLLGTCMAIGDGVLTPAISVLSAVSGVKVKITGLHENYVVIISCVILVGLFSLQHHGTNRVAFMFAPIVTAWLLCISSIGIYNIFRWNQHVFCAISPIYMLKFLKNTGTEGWVSLGGVVLSITGVETMFADLGHFSSSSIKVAFTFVVYPCLILAYMGEAAFLSKHHEDIQRSFYKAIPES…
15	275	Dicotyledons	Malpighiales	Willow	Salix purpurea	2	SpHAK2	I:b	>SapurV1A.0052s0820 peptide: SapurV1A.0052s0820.1.p (PAC:31400182)	MSDDAIQAINEESRGEEFSRQLKGKKLSWQKLRRNDSLEMESGKFSGRQAHGSKGASWPVILQLAFQSIGIVYGDIGTSPLYVYASTFTKGINHNDDILGVLSLIFYTLTLIPLIKYVLIVLRANDNGDGGTFALYSLICRYARVGLLPSRQVEDRDVSNFRLELPSKRLRRASKLKSMLESSKFAKFFLLFATMLGTSMVIGDGVLTPCISVLSAVGGIKEAASTMTQDSIVWISVAILICLFMVQRFGTDKVGYSFAPIICVWFSLIGGIGIYNLFKYDPAVVKALNPKYIVDYFRRNKKDAWISLGGVVLAITGTEALFADVGHFTVRSIQISMCAVTYPALIAAYVGQAAFLRKHNGLVSETFFKSIPDPLYWPMFVVSVMASIIASQAMISGTF…
15	276	Dicotyledons	Malpighiales	Willow	Salix purpurea	3	SpHAK3	II:b	>SapurV1A.0059s0490 peptide: SapurV1A.0059s0490.1.p (PAC:31444402)	MELESGSSNGQSRLKFYKSTLILAYQSFGVVYGDFSTSPIYVYTSTFSGRLRLHEDDDEILGVLSLVFWTLTLIPLCKYIVFVLGADDNGEGGTFALYSLLCRCAKLGLLRPSHATDDDISSQDSRLLIKETRTSSLLKEFFDKHHSSRVVLLLIVILGTSMVIADGILTPSMSVLSAVYGIKTKAGGLHENYAILITCLILVGLFALQHTGTRRVGFLFTPIILVWLLSISGVGIYNIIHWNPRVVSALSPYYVYKLFKLTGKDGWSSLGGIVLCITGAEAMFADLGHFSQLSIRIAFTTIIYPSLILAYMGEAAYLSKHKEDLQRSFYRAIPEVVFWPVFIISTLATVVASQAVISATFSIISQCRALNCFPRVKIIHTSNQVHGQIYIPEVNWMLM…
15	277	Dicotyledons	Malpighiales	Willow	Salix purpurea	4	SpHAK4	II:c	>SapurV1A.0062s0150 peptide: SapurV1A.0062s0150.1.p (PAC:31414380)	MDLETGVFQNHVKRESWKTVLTLAYQSLGVVYGDLSTSPLYVYKSTFAEDIQHSETNEEIYGVLSFVFWTLTLVPLLKYVFIVLKADDNGEGGTFALYSLLCRHARINSLPNCQVADEELYEYKRDAATTCLTPTTTFGSRLKSTLEKHRVLQRFLLLLALIGTCMVIGDGVLTPALSVFSAVSGLELSMAKEHHKYVEVPVACTILIGLFALQHYGTHRVGFLFAPVVFVWLMCISAIGIYNIIHWNPHVYQALSPYYMYKFLRKTQRGGWMSLGGILLCITGSEAMFADLGHFSQLSIKIAFTSLVYPSLILAYMGQAAYLSQHHVIDNDYHIGFYVSVPGKLRWPVLVIAILAAVVGSQAIITGTFSIIKQCSALGCFPRVKIVHTSSKIHGQIYI…
15	278	Dicotyledons	Malpighiales	Willow	Salix purpurea	5	SpHAK5	I:a	>SapurV1A.0062s0160 peptide: SapurV1A.0062s0160.1.p (PAC:31413828)	MGGDDDWIEESSVRLMASSNDGIVDGVGVGESRWVDGSEVDSESPPWSLLDENDSGQGYGSMRRRLVKKPKRVDSFDVEAMEIAGAHRRHSKDLSVWQNLALAFQTLGVVYGDMGTSPLYVFTDVFSKVPIRSEVDVLGALSLVIYTIALIPLAKYVFIVLKANDNGEGGTFALYSLICRHAKVNMLPNRQPADENISSYRLKLPTPELERALNIKETLEKRSSLKTLLLLLVLTGTSMVIGDGILTPAMSVMSAVSGLQGEVSGFGTSAVVIVSIIILLGLFSIQRFGTGKVGFMFAPVLALWFFSLGAIGIYNLVKYDISVLKALNPAYIYFFFKKNSSAAWSALGGCVLCITGAEAMFADLGHFSVQSVQIAFTCVVFPCLLLAYMGQASYLMKYP…
15	279	Dicotyledons	Malpighiales	Willow	Salix purpurea	6	SpHAK6	II:a	>SapurV1A.0071s0500 peptide: SapurV1A.0071s0500.1.p (PAC:31405958)	MILQLSWVTLSRNLLFTYQSFGVVYGDLSTSPLYVYSSMFGGRMQNHQTEEVIFGAFSLVFWTLTLIPLIKYVCIVLSADDNGEGGTFALYSLLCRHAKFSLLPNQQAADEELSSYKYGPSTHATASSPLKRFLEKHKRLRTALLIVVLFGASMVIGDGVLTPAISVLSAVSGLQEANSKLTKGELVLLACVILVGLFALQHCGTHKVAFMFAPIVIIWLVSILSIGLYNIVHWNPKIVHALSPRYIIKFFSHTGKEGWISLGGVLLSITGTEAMFADLGHFTALSIRLAFALVIYPCLVVQYMGQAAFLSKNPNSIPNSFYESIPDKIFWPLCVIATLAAIVGSQAVITATFSIVKQCHALGCFPRVKVVHTSKNIYGQIYIPEINWILMILTLAITV…
15	280	Dicotyledons	Malpighiales	Willow	Salix purpurea	7	SpHAK7	II:c	>SapurV1A.0109s0240 peptide: SapurV1A.0109s0240.1.p (PAC:31454640)	MDLGHGRCWDTSKKDSWKTLLLLAYQSLGVVYGDLSTSPLYVYKSTFADDIQHSDTNEEIFGVLSFVFWTLTLVPLFKYVFVVLRADDNGEGGTFALYSLLCRHAKVSLLPNRQVADESLSTYKLENPPEKNNSRVKMYLEKHKALHTALLILVLLGTCMVIGDGLLTPAISVFSAVSGLELSMSSDHHQYAVVPITCFILVCLFTLQHYGTHRVGFLFAPVVLAWLLCISALGLYNIIHWNPHVYQALSPYYMFKFMKKTKKGGWMSLGGILLCITGSEAMFADLGHFSYAAFQIAFTFLVYPALILAYMGQAAYLSQHHDNANHIGFYISVPGKLRIPVLIIAILASVVGSQAIISGTFSIINQSQSLGCFPRVKVVHTSDKIHGQIYIPEINWMLM…
15	281	Dicotyledons	Malpighiales	Willow	Salix purpurea	8	SpHAK8	II:a	>SapurV1A.0119s0310 peptide: SapurV1A.0119s0310.1.p (PAC:31444486)	MAECKNRRKHVLLLAYQSFGVVFSDLSTSPLYVYKCTFSGRLRHYQNEDTVFGAFSLVFWTLTLFSLFKYVGFMLCANDNGEGGIFALYSVICRHAKFCLLPNQQAADEEISTYHSAGYSNRNVVSSRFKKFVEGHKKMKTALLVLVLFGAAVFITIAIFTPAISILSSVEGLQVRAKNLHRGMLVIIALFLLIGLFVLQHYGMHRVAFMFAPIVILWLLSVAFVGIYNIINWNPRVYQALSPYYIYKFFEETGKDGWISLGGILLCITGTEVVFAGLGHFTASSIRVAFSFVVYPCLVLQYMGQAAFLSQNFSAVSTSFHSSIPDWLFWPVTVMATLAAIVASQAVVSATFSIANQCHALGCFPRIKIVHKSKWLHRQTYIPEINWALMILCLAVTVG…
15	282	Dicotyledons	Malpighiales	Willow	Salix purpurea	9	SpHAK9	II:c	>SapurV1A.0200s0110 peptide: SapurV1A.0200s0110.1.p (PAC:31416533)	MDLETGISQNHVKRESWKTVLTLAYQSLGVVYGDLSTSPLYVYKSTFADDIQHSETNEEIYGVLSFVFWTLTLIPLLKYVFIVLKADDNGEGGTFALYSLLCRHARVSSLPNCQVADEELYEYKKDAAATCLTPKTTFGPRLKSTLEKHRVLQRFLLLLALIGTCMVIGDGVLTPALSVFSAVSGLELSMSREHHKYVEVPVACIILIGLFALQHYGTHRVGFLFAPVVLTWLLCISAIGIYNIIHWNPHVYQALSPYYMYKFLRKTQRGGWMSLGGILLCITGSEAMFADLGHFSQLSIQIAFTSLVYPSLILAYMGQAAYLSQHHAIDSDYHIGFYVSVPGKLRWPVLVIAILAAVVGSQAIITGTFSIIKQCSAMGCFPRVKIVHTSSKIHGQIYI…
15	283	Dicotyledons	Malpighiales	Willow	Salix purpurea	10	SpHAK10	IV	>SapurV1A.0203s0040 peptide: SapurV1A.0203s0040.1.p (PAC:31415554)	MSGGGGERQGGTAQELGETDSAANKREIVVNVESSSAIPYYYSNRHSLRLRNSGFIPSAPLAVTSTIPKEMGRWETVVLAYKTLGVVFGGLVTSPLYVYPSMPLKSPTEQDYLGIYSIMFWTLTLIGVVKYTCIALKADDQGEGGTFALYSLLCRNMNIGLLSSKQAQTNSSLSHSALLGSTENKSRLRIFFERSIVARRVLLFIAMLGTCMLIGDGILTPAISVLSAMDGIRAPFPSVSKSLVEALSAGVLVVLFLLQKFGTSRVSFMFSPIMGAWTLCTPLVGIYSIIQHYPSIFKALSPHYIFRFFWRNGKEGWLLLGGTVLCITGSEALFADLGHFNRSSIQIAFLLTIYPSLVLTYAGQTAYLIKNPTDHDDGFYKFIPTTIYWPIFIISTLAA…
15	284	Dicotyledons	Malpighiales	Willow	Salix purpurea	11	SpHAK11	III	>SapurV1A.0324s0130 peptide: SapurV1A.0324s0130.1.p (PAC:31421877)	MASGGNSNEEIDYKSRIWVLDQNLDQPIDAEAEKLRNKYEDKKFSRLLLMQLAFQSLGVVYGDLGTSPLYVFYNTFPDGIEDPEDLIGALSLIIYSLTLIPLLKYVLIVCRANDNGQGGTFALYSLLCRHAKVKTIPNQDLTDEQLTTYSRSTFHETSFAGKTKRWLEEHPFRKNALLVLVLVGSSMVIGDGILTPAISVLSAVQGIKLDHPSMSSDVVVLVAVVILVGLFSMQHHGVDRVSWLFAPIVLLWFLLIGGIGLFNIWKYDTGVLKAISPVYIYRYFRRGGRDSWLSLGGIMLSITGTEALFADLSHFPVPSIQIAFTTVVFPCLLFAYFGQAAYLMKNTSHVVDAFYSSIPDCIYWPVLLVATAAAVVASQATICATFSLIKQALALGCFP…
15	285	Dicotyledons	Malpighiales	Willow	Salix purpurea	12	SpHAK12	III	>SapurV1A.0324s0140 peptide: SapurV1A.0324s0140.1.p (PAC:31420559)	MEMTSRVEVEEDSDNNKGSMWDFDQKLDQPMDEEAGRLRNTYREKKFSQLLLLRLAFQSLGVVYGDLGTSPLYVFYNTFPHGIKDPEDVIGALSLIIYSLTLIPLLKYVFVVCRANDNGQGGTFALYSLLCRHANVRTIPNQHRTDEELTTYSRSTFHEQSFAAKTQRWLERYAFRKNALLILVLVGTCMVIGDGILTPAISVLSASGGIKVNHPKLISNDVVTVVAVVILVGLFSMQHYGTDKVGWLFAPIVLLWFLLIGGIGLFNIWKYDTSVLKAFSPVYIYRYLRRGGKYCWTSLGGIMLSITGIEALFADLAHFPVAAIQIAFTVVVFPCLLLAYSGQAAYLMQNREHVVDAFYRSIPQSIYWPVFIVATAAAVVASQATISATFSIIKQALAL…
15	286	Dicotyledons	Malpighiales	Willow	Salix purpurea	13	SpHAK13	III	>SapurV1A.0325s0230 peptide: SapurV1A.0325s0230.1.p (PAC:31445458)	MELSMEMTPRVEVEEDSDNNKGSMWDLDQKLDQPMDEEAGRLRNIYREKKFSALLLLRLAFQSLGVVYGDLGTSPLYVFYNTFPRGINDSEDVIGALSLIIYSLTLIPLLKYVFIVCKANDNGQGGTFALYSLLCRHAKVRTIPNQHRTDEELTTYSRSTFHEQSFAAKTKRWLERYAFRRSALLILVLVGTCMLIGDGILTPAISVLSASGGIKVNQPKLSNDVVIVVAVVILVGLFSMQHYGTDKVSWLFAPIVLLWFLLIGGIGLFNIWKYDTRVLKAFSPVYIFRYFRRGGRDSWTSLGGIMLSITGTEALFADLSHFPVSAVQLAFTVLVFPCLLLAYSGQAAYLMQNKEHVFDAFYRSIPDRIYWPVFIVATAAAVVASQATISATFSIIKQA…
15	287	Dicotyledons	Malpighiales	Willow	Salix purpurea	14	SpHAK14	V	>SapurV1A.0344s0140 peptide: SapurV1A.0344s0140.1.p (PAC:31422721)	MEEENGIGRSEINGRLASMESMELRWVFQDDDDDEDDDSVMDDDNSRQRLRGGLESDEEDEEDTAEQRLFRTGPRIDSFDVEALEIPSAHRNDYYYEELGVGRRILLAFQTLGVVFGDVGISPLYTFGVMFSKAPINGEEDVIGALSLVLYTLILIPLLKYVLVVLWANDDGEGGTFALYSLICRHAKANLLPNQLPSDARISSFRLKVPSPELERSLKIKERLETSVTLKRLLLVLVLAGTSMLIADGVVTPVMSVMSAVGGLKVGVPAIEQEQVVMISVAFLVILLSVQKFGTSKVGLVVGPALFLWFCSLAAIGIYNLVKFDSRVLRAFNPVHIYHFFKRNSTKAWRALGGCLLCATGSEAMFADLCYFSVRSVQLTFVFLVLPCLLLGYLGQAAY…
15	288	Dicotyledons	Malpighiales	Willow	Salix purpurea	15	SpHAK15	I:a	>SapurV1A.0444s0160 peptide: SapurV1A.0444s0160.1.p (PAC:31422176)	MAEKELETNQEQMEEETTVENKLKGRKLSWRNLRRVDSLNLEAGRVSMSQGHGARTSKTNWQVTLSLVFQSIGVVYGDIGTSPLYVYSSTFTEGIHHDEDIVGVLSLIIYTIVLVPMLKYVFIVLWANDNGDGGTFALYSLICRSAKVGLIPKDQPEDHKLSNYRLDTPSNQLRRAEVIKEKMESSKSIKIILFLITILGTSMVIGDGVLTPCISVLSAVSGIKSLGQDAVVGISIAILIALFSVQRLGTDKVGFAFAPVIFLWFSFIGGIGLFNLFKYDLGVLRAFNPKYIIDYFKRNGKQGWISLGGIVLCITGTEAMFADLGHFSVRAIQISFSSIVFPALVAAYSGQAAYLTKFKDDVSDTFYKSIPDPLYWPTFVVAVAAAVIASQAMISGAFS…
15	289	Dicotyledons	Malpighiales	Willow	Salix purpurea	16	SpHAK16	I:a	>SapurV1A.0444s0170 peptide: SapurV1A.0444s0170.1.p (PAC:31422393)	MTETNQVEVETKLKDRKLSWAKLRRVDSLHLEAGRVSMPYGHTSTISWKRTLSFAFQSIGIVYGDIGTSPLYVFSSTFTDGTIHKNEDILGVLSLIIYTIVLVPMIKYVFIVLRANDHGDGGTFALYSLLCRYARVSLIPNDQPEDSQLSNYKLDTPSSQLRRAQVIKEKMESSKAIKIILFLVTILGTSMVIGDGVLTPCISVLSAVGGIKSLGEDTVLGVSIAILIVLFSVQRFGTDKVGFAFAPVIFLWFSFIGGIGLFNLFKYDLGVLRAFNPKYIIDYFQRNGKQGWISLGGVVLCITGTEAMFADLGHFSVKAIQISFSSIVLPALLAAYAGQAAYLSKFPDDVSDTFYKSVPDPLYWPMFVVAVAAAIIASQAMISGAFSIVAQSLSLNCFP…
15	290	Dicotyledons	Malpighiales	Willow	Salix purpurea	17	SpHAK17	II:a	>SapurV1A.0542s0070 peptide: SapurV1A.0542s0070.1.p (PAC:31399471)	MEAGAGTHRSSNPSQFSWSILSRNLLLAYQSFGVVYGDLSTSPLYVYTNTFAGKMQKHQTEEVIFGAFSLIFWTFTLIPLIKYICIMLSADDNGEGGTFALYSLLCRHAKFSLLPNQQAADEELSAYKFGPSTQAISSPLKRFLEKHRRLRTVLLLVVLFGACMVIGDGVLTPAISVLSAVSGLQVAENKLTSGVIVLLACVILVGLFALQHCGTHKVAFMFAPIVIIWLVSILSIGLYNIIHWNPKILRALSPHYIIKFFSQTGKDGWISLGGVLLSITGTEAMFADLGHFTALSIRLAFALAIYPCLVVQYMGQAAFLSKNPSSMSNSFYDSIPDRVFWPVCVIATLAAVVGSQAVITATFSIVKQCHALGCFPRVKVVHTSKHIYGQIYIPEINWI…
15	291	Dicotyledons	Malpighiales	Willow	Salix purpurea	18	SpHAK18	II:c	>SapurV1A.0665s0050 peptide: SapurV1A.0665s0050.1.p (PAC:31431488)	MDPPFSPSTYSDGLKKETWRHSLILSFQTLGVVYGRFSTAPLYVFGTIQTTNFKSNETAYEYFSFLFWTLTIVSLLKYTFIVLRADDNGEGGIFALYSLLCRHCKVGLLPNDRSTEEIMQHEEVSTLRGKVESRARKAIRNRRSSHYFMLLIALFGACMIIGDGVITPSISVLSASSGVQRSLSNIKYTSSTDAEQTISDDLRKYVPVPSACVITVGLFILQYYGTHKIGFMFAPIVTIWLLFISGVGMYNVFHWDPKIFSAISPVYMYRFVRKINKASWKSLNSILLCVAGSETMFTDLGHFSKRSIKLTFVCLIYPALVLCYAGQAAFISKHWNGTENFNHLSESVPKHLRHVFILLSLLASAVGSQATITATFSIINQCLTLGCFPRVKVIHTSDK…
15	292	Dicotyledons	Malpighiales	Willow	Salix purpurea	19	SpHAK19	V	>SapurV1A.0809s0140 peptide: SapurV1A.0809s0140.1.p (PAC:31445744)	MADESGIGGSETNSRLASMDSVESRWVFQDDDEDDSLMDDDDDEEEEEHGRLRRGGGLDSEEEDEEDTAEQRLIRTGPRIDSFDVEALEIPSAHRNDYYHEELGAGRRILLAFQTLGVVFGDVGTSPLYTFHVMFTKAPVNGGEDVIGALSLVMYTLILIPLVKYVLVVLCANDDGEGGTFALYSLICRHAKVNLLPNQLPSDARISSFRLKVPSAELERSLKIKERLETSPHLKKMLLMLVLAGTSMLIADGVVTPAMAVMSAVGGLKVGVPSIKQEQVVMISVAFLVILFSVQKFGTSKVGLVVGPALFIWFCSLAAIGIYNLVKYDISVLRAFNPVHIYYFFKRNSSKAWRALGGCLLCATGSEAMFADLCYFPVRSVQLTFVFLVLPCLLLGYLG…
15	293	Dicotyledons	Malpighiales	Willow	Salix purpurea	20	SpHAK20	V	>SapurV1A.0952s0110 peptide: SapurV1A.0952s0110.1.p (PAC:31445207)	MISVAFLVILFSVQKFGTSKVGLVVGPALFIWFCSLAAIGIYNLVKYDISVLRAFNPVHIYYFFKRNSSKAWRALGGCLLCATGSEAMFADLCYFPVRSVQLTFVFLVLPCLLLGYLGQAAYLMEHHSVDLAEQAFFSSVPSGVFWPVFLVANLAALIASRTMTTATFSCIKQSTALGCFPRLKIVHTSRKFMGQIYIPVINWFLLVACLVLVCSISSITEIGNAYGIAELGVMMTTTILVTIVMLLIWKINIIIVLSFLAIFLGIEFVFFSSVLGVVGDGSWIVLVFAVVMFFVMLVWNYGSKLKYETEVKQKLSMDLVRELGPNLGTIRAPGIGLMYNELVKGIPAIFGHFLTTLPAIHSMIIFVCIKYVPVPVVPQGERFLFRRVCPRSYHIFRCI…
15	294	Dicotyledons	Malpighiales	Willow	Salix purpurea	21	SpHAK21	II:c	>SapurV1A.1794s0040 peptide: SapurV1A.1794s0040.1.p (PAC:31429757)	MDLGHGKCWDSSKKDSWKTLFLLAYQSLGVVYGDLSTSPLYVYKSTFAEDIQHSDTNEEIFGVLSFVFWTLTLVPLFKYVFVVLRADDNGEGGTFALYSLICRHANVSLLPNRQVADEALSTYKLENGPEKKNSSIIKMYLEKHRCLHTALLILVLLGTCMVIGDGILTPAISVFSAVSGLELSMSDNHHQYAVVPITCFILVCLFALQHYGTHRVGFLFAPVVLAWLLCISALGLYNIIHWNPHVYQALSPYYMYKFLKKTKKGGWMSLGGILLCITGSEAMFADLGHFSYAAIQIAFTFLVYPALILAYMGQAAYLSQHHDNTNHIGFYISVPEKLRIPVLIIAILASVVGSQAIISGTFSIINQSQSLSCFPRVKVVHTSDKIHGQIYVPEINWML…
15	295	Dicotyledons	Malpighiales	Willow	Salix purpurea	22	SpHAK22	III	>SapurV1A.2895s0010 peptide: SapurV1A.2895s0010.1.p (PAC:31433295)	MELSMEMTPRVEVEEDSDNNKGSMWDLDQKLDQPMDEEAGRLRNIYREKKFSALLLLRLAFQSLGVVYGDLGTSPLYVFYNTFPRGINDSEDVIGALSLIIYSLTLIPLLKYVFIVCKANDNGQGGTFALYSLLCRHAKVRTIPNQHRTDEELTTYSRSTFHEQSFAAKTKRWLERYAFRRSALLILVLVGTCMLIGDGILTPAISVLSASGGIKVNQPKLSNDVVIVVAVVILVGLFSMQHYGTDKVSWLFAPIVLLWFLLIGGIGLFNIWKYDTRVLKAFSPVYIFRYFRRGGRDSWTSLGGIMLSITGTEALFADLSHFPVSAVQLAFTVLVFPCLLLAYSGQAAYLMQNKEHVFDAFYRSIPDRIYWPVFIVATAAAVVASQATISATFSIIKQA…
15	296	Dicotyledons	Malpighiales	Willow	Salix purpurea	23	SpHAK23	II:c	>SapurV1A.4781s0010 peptide: SapurV1A.4781s0010.1.p (PAC:31406794)	MLVIFYFYFKKISSSTPFLLVLPEWVIVKWNISNSESSPLGLIMDLETGFLKTMLRRIILIHRESWKTVLTLAYQSLGVVYGDLSTSPLYVYKSTFADDIQHSETNEEIYGVLSFVFWTLTLIPLLKYVFIVLKADDNGEGGTFALYSLLCRHARVSSLPNCQVADEELYEYKKDAAATCLTPKTTFGPRLKSTLEKHRVLQRFLLLLALIGTCMVIGDGVLTPALSVFSAVSGLELSMSREHHKYVEVPVACIILIGLFALQHYGTHRVGFLFAPVVLTWLLCISAIGIYNIIHWNPHVYQALSPYYMYKFLRKTQRGGWMSLGGILLCITGSEAMFADLGHFSQLSIQIAFTSLVYPSLILAYMGQAAYLSQHHAIDSDYHIGFYVSVPGKLRWPVL…
16	297	Dicotyledons	Malpighiales	Cassava	Manihot esculenta	1	MeHAK1	II:c	>Mesculenta|cassava4.1_001975m.g|cassava4.1_001975m	MDLEHGKCWDTSKKDSWKTLLVLAYQSLGVVYGDLSTSPLYVYKSTFAEDIQHSESNEEIFGVLSFVFWTLTLVPLFKYVFVVLRADDNGEGGTFALYSLICRHAKVSLLPNRQVADEALSTYKMEHPPEKNNKSKVKLYLEKRKGLHTALLILVLLGTCMVIGDGLLTPAISVFSAVSGLELSMSKEHHQYAVIPITCFILVCLFALQHYGTHRVGFFFAPVVLTWLLCISALGLYNIIYWNPHVYKALSPYYMFKFLKKTRKGGWMSLGGILLCITGSEAMFADLGHFSYAAIQIAFTFMVYPALILAYMGQAAYLSQHHDDNSHIGFYISVPEKLRLPVLIIAILSSVVGSQAIISGTFSIINQSQSLGCFPKVKVVHTSDKIHGQIYIPEINWIL…
16	298	Dicotyledons	Malpighiales	Cassava	Manihot esculenta	2	MeHAK2	V	>Mesculenta|cassava4.1_033878m.g|cassava4.1_033878m	MISVAFLVILFSVQKFGTSKVGLGVGPALFLWFCSLAGIGIYNLVKYDSSVVRAFNPVHIYYFFKRNSSKAWRALGGCLLCATGSEAMFADLCYFSVRSIQLTFVFLVLPCLLLGYLGQAAYLMENHAADVAEQAFFSSVPSSAFWPVFLIANIAALIASRAMTTATFSCIKQSTALGCFPRLKIIHTSRKFMGQIYIPVINWFLLVVCLVFVCSISSITEMGNAYGIAELGVMMMTTVLVTIVMLLIWQINIIVVLSFAVIFLGIELIFFSSVLALVGDGSWIILVFAAIMFFIMYIWNYGSKLKYETEVKKKLSMDLMRELGPNLGTIRAPGIGLLYNELVKGVPAIFGHFLTTLPAIHSMIIFVCIKYVPVPVVPQSERFLFRRVCPKGYHIFRCI…
16	299	Dicotyledons	Malpighiales	Cassava	Manihot esculenta	3	MeHAK3	II:c	>Mesculenta|cassava4.1_029286m.g|cassava4.1_029286m	MDLETGLYQKQLKKESWKTVIILAYQSLGVVYGDLSTSPLYVYKSTFAEDIQHSETNEEIFGVLSFVFWTLTLVPLLKYVFIVLRADDNGEGGTFALYSLLCRHARVNSLPNCQVADEELYEYKKDNIGLAPNSSFGARLKSTLEKRRVLQRFLLVLALIGTCMVIGDGVLTPAISVFSAVSGLELSMSKEHHKYVEVPVACVILIGLFALQHYGTHRVGFLFAPVVLTWLLCISAIGIYNIVHWNPHVYQALSPYYMYKFLRKTQRGGWMSLGGILLCITGSEAMFADLGHFSQLSIQIAFTSLVYPSLVLAYMGQAAYLSKHHFVDSDNRVGFYVSVPDKLRSPVLVIAILAAVVGSQAIITGTFSIIKQCSALGCFPRVKIVHTSSKIHGQIYIPE…
16	300	Dicotyledons	Malpighiales	Cassava	Manihot esculenta	4	MeHAK4	V	>Mesculenta|cassava4.1_001668m.g|cassava4.1_001668m	MEGDRIEESSVRLLSRPSSGGGVGESRWVDGSEVDSESPPWSLLDENDSREGYGSIRRRLIKKPKRADSFDVEAMEITGAKGHHSKDLSTWTTIALAFQTLGVVYGDLGTSPLYVFADVFSKVKIDSEVDILGALSLVMYTIALIPLAKYVFVVLKANDNGEGGTFALYSLICRYAKVSMLPNRQPADEQISSFRLKLPTPELERALNIKDALERKSSLKTILLLLVLMGTSMVIGDGILTPAISVMSAMSGLQGEIPGFGTTALVVVSIIILVALFSIQQFGTGKVSFLFAPVLALWFFSLASIGLYNLVTYDVSVLRAFNPAYIYLFFKKNSFDAWSALGGCVLCITGAEAMFADLGHFSVKAIQIAFSCVVFPCLLLAYMGQASYLMKHPESSGRI…
16	301	Dicotyledons	Malpighiales	Cassava	Manihot esculenta	5	MeHAK5	II:a	>Mesculenta|cassava4.1_002033m.g|cassava4.1_002033m	MVEIKTPRKHVLLLAYQSFGIVFGDLSTSPLYVYRSIFSGKLRHYQTEDTIFGAFSLIFWTLTFFSLIKYVVFMLCADDNGEGGIFALYSLLCRHAKFSLLPNQQAADEELSTYHGEGRSNRNVLSSAFKKLVERRKKVKTALLLVVLFCASMVITMGVLTPAISILSSIEGLQVQAKNLHHGMVVLIACIVLIGLFVLQYRGTHRVAFMFAPIVIIWLLSIAIIGAYNVIHWNTRVYQALSPYYVYQFFRETGKDGWISLGGILLCVTGTEVIYAELGQFTASSVRLAFSFVVYPCLVLQYMGQAAFISKNFSTVSLSFYSSIPDSLFWPVLVMAILSTIVASQAVVCATFSIVKQCHAYGCFPRIKIVHKPKWIDRQMYIPEINWILMVLCLAITIG…
16	302	Dicotyledons	Malpighiales	Cassava	Manihot esculenta	6	MeHAK6	I:b	>Mesculenta|cassava4.1_002633m.g|cassava4.1_002633m	MNWGTVLKLAFQCIGVVYGDLGTSPLYVLPGIFPDGIKHNDDLLGVLSLIIYSIIIITLIKYVFVVLSANDNGEGGTFAIYSLICRHAKVNMIPNHQAEDRELSNYKLKTPHRRMKMASAVKSKLENSYIMKVSLLFMSMLGVSMVLGDGVLTPCISVLSAVSGIKEADASLTDNAIMWISVGILIFLFQIQRFGTDKVGYTFAPIIIIWFGFIACIGIFNTVKYDPSVMKAVNPWYIVQYFKRNKKDAWISLGGVILCLTGSEALFADLGHFNILSVQISSCSVLIPSVLLAYVGQCSYLRENTQDVTDAFYKSIPSEYTPDVSTTSALDLFLCLIIYVIDFFGAESMYWPQFIVAVLAAIIASQSLISASFSIIQQSVALGCFPRVKVVHTSAEHEG…
16	303	Dicotyledons	Malpighiales	Cassava	Manihot esculenta	7	MeHAK7	I:b	>Mesculenta|cassava4.1_033815m.g|cassava4.1_033815m	MAGLVEERLSIEEQQKQEQCGRGTSLTKQRSFDLEADGFTTYTDRQKKDWRTILKLAFQCIGVVYGDLGTSPLYVLPGIFPDGIENKEDILGVLSLIIYSIIIISLIKYVFIVLSANDNGDGGTFALYTLICRHAKVSLIPTQQAEDTEVSTYKLDLPKHSTKMASALKTSLESSLIIKYSLLFTTMVGVSMVLGDGILTPCISVLSAVGGIKEAVPNLSEDVIMWISVVILILLFQVQRFGTYKVGYSFAPILVLWFAFIASIGLFNFIKYDPGVIKAVNPWHIAKYFQRNKKSAWISLGGVILCLTGSEALFADLGHFHIHSIRLSSCAVLVPSVLLAYMGQCSYLSKNTEDVADSFYKSIPKSLYWPQFVLAVVAAIIASQSLISASFSIIQQSVA…
16	304	Dicotyledons	Malpighiales	Cassava	Manihot esculenta	8	MeHAK8	II:c	>Mesculenta|cassava4.1_027041m.g|cassava4.1_027041m	MTETLMMIQRAKVNDSADVELPVVCAILVFLFTLQHYGTHRVGFLFAPVVITWLLCISAIGVYNILQWNPHVYQALSPYYMYKFLKKTQRGGWMSLGSEAMFADLGHFSQLSIKIAFTFVVYPSLILAYMGQAAYLSKHHINETDYQIGFYVSVPEKIRWPVLAVAILAAVVGSQAIITGTFSIIKQCSALGCFPKVKIVHTSSKIHGQIYIPEVNWILMLLCLAVTIGFRNTKHMGNAAGLAVVTVMLVTTCLMSLVMVLCWHKNVFLAICFIFFFGSIEALYFSASLIKFLEGAWVPIALSFIFLVVMYVWHYGTLKKYEADVQNKVSINWLLSLGPSLGIVRVRGIGLIHTELVSGIPAIFSHFVTNLPAFHQVVVFLCIKSVAVPHVRPEERFLV…
16	305	Dicotyledons	Malpighiales	Cassava	Manihot esculenta	9	MeHAK9	II:b	>Mesculenta|cassava4.1_025369m.g|cassava4.1_025369m	MVQESGSATRESRLKLYKTTLLLAYQSFGVVYGDLCTSPIYVYKSTFSGSLQLYEEDNEIFGVLSLVFWTLTIIPLCKYIIFVLGADDNGEGGTFALYSLLCRRSKMGFLQSSHIENGFLSAQDSSVPTKETTTNLLIKEYFKKRHSSRVVLLLVVLLGTSMVIGDGILTPTMSVLSAVYGIQIKVPNLHENYTVAIACVVLVGLFALQHFGTHRVGFLFAPILLAWLLCLGGVGIYNIFHWNPGVINSLSPYYIYKFFQKAGKNGWRSLGGIFLCVTGAEAMFADLGHFSKLSLRIAFTVIVYPCLVLAYMGEAAYLSKHKDDLQSSFYKAVPEEIFWPVFLIATLATVVGSQAIISATFSLISQSRALGCFPRVKIVHTSNNIHGQIYIPEVNWLLM…
16	306	Dicotyledons	Malpighiales	Cassava	Manihot esculenta	10	MeHAK10	III	>Mesculenta|cassava4.1_004487m.g|cassava4.1_004487m	MSSDVVVFVAVVILVGLFCMQHHGIDRVGWLFAPVVFLWFLLIGGIGIFNIWKYDKGVLKAFSPVYICRYFRSGGRDNWLSLGGIMLSITGTEALFADLSHFPVLSIQIAFTAIVFPCLIFAYSGQAAYLLKNPNHVADAFYRSIPDSIYWPVLIVATAAAVVASQATISATFSLIKQALALDCFPRVKIVHTSEKFLSQIYIPDINWILMVLCVAVTAGFKNQSQIGNASGTAVVIVMLVTTLLMILIMLLVWRCHWIVVAIFTGLSLIVEGTYFSSVLCKVNQGGWVPLVIAAAFFVIMYAWHYGTMKRYEFEMHSKVSMAWILGLGPSLGLVRVPGIGLVYTELARGVPHIFSHFITNLPAIHSVVVFVCVKHLPVYTVPEEERFLIKRIGPRNFR…
16	307	Dicotyledons	Malpighiales	Cassava	Manihot esculenta	11	MeHAK11	II:c	>Mesculenta|cassava4.1_002050m.g|cassava4.1_002050m	MDLEGVLHDSPIKRDSWKTVLTLAYQSLGVVYGDLSTSPLYVYKSTFAEDIQHSETNEEIFGVLSFVFWTLTLIPLVKYVFIVLRADDNGEGGTFALYSLLCRHARVSSLPNCQLADEELSEYKKDGSVTVSSDKRVHGSSLKSTLEKCRVLQRVLLVLALIGTCMVFGDGVLTPAISVFSAVSGLELSMSKEQHQYVELPVVCAILVFLFALQHYGTHRVGFLFAPVVITWLLCISAIGVYNIWQWNPHVYQALSPYYMYKFLKKTQKGGWMSLGGILLCITGSEAMFADLGHFSQLSIKIAFTFAVYPSLILAYMGQAAYLSKHHTIESDYRIGFYVSVPEKIRWPVLAIAILAAVVGSQAIITGTFSIIKQCSALGCFPKVKIVHTSSKIHGQIYI…
16	308	Dicotyledons	Malpighiales	Cassava	Manihot esculenta	12	MeHAK12	I:a	>Mesculenta|cassava4.1_021596m.g|cassava4.1_021596m	MAVENKLKERKISWAKLRRVDSLNLEAGRVSKTQHNNQVNWKKTLSLTFQSIGVVYGDIGTSPLYVYESTFPDKIGSKEDILGVLSLIIYTLVLLPMLKYVFIVLRANDNGDGGTFALYSLLSRYVKVSLIPNDQPEDTQLSNYKLEIPSNQLKRSEKIKEKMENSKNIKILLFLVTILGTSMVIGDGVLTPCISVLSAVSGIGSLGQDAVVGISIAILIVLFCAQRLGTDKVGFSFAPIILLWFSFIGGIGLYNLFKYDVSVLRAFNPKYMFDYFKRNGKQGWISLGGVVLAVTGTEAMFADLGHFNVQAIQISFSGIVFPALLCAYAGQAAYLTKFPDDVSKTFYKSIPDPLYWPTFVVAVAAAIIASQAMISGAFAIISQSLSLGCFPRVKVIHTS…
16	309	Dicotyledons	Malpighiales	Cassava	Manihot esculenta	13	MeHAK13	I:b	>Mesculenta|cassava4.1_025346m.g|cassava4.1_025346m	MTENSNIAAQISINTGESSDQFSKPLSGKKLSWQKLRRNDSLEIESSKFPGRQLHGSKAVSWSVILHLAFQSLGIVYGDIGTSPLYVYSSTFTDGILHNDDILGVLSLILYTITLIPLVKYVLIVLRATDNGDGGTFALYSLICRYAKVGLIPSQQAEDHDVSNFQLELPSKRLRRATKLKSKLENSKFAKFFLLFATMLGTSMVIGDGVLTPCISVLSAVGGIKQATTKMTENMIVWISVAILISLFMVQRFGTDKVGYSFAPIICVWFAMNCGIGVYNFFKYDPAVIKALNPKYIIDYFTRNKDKAWISLGGIVLSITGTEALFADVGHFTVRSIQLSMCTVTYPALVCAYFGQAAFLRKHNDLVSDTFYESIPDPLYWPMFVVAVLSSIIASQAMI…
16	310	Dicotyledons	Malpighiales	Cassava	Manihot esculenta	14	MeHAK14	II:c	>Mesculenta|cassava4.1_002041m.g|cassava4.1_002041m	MDLEIGPFQNHVKKESWKTVLTLAYQSLGVVYGDLSTSPLYVYKSTFAEDIRHSETNEEIFGVLSFVFWTLTLVPLLKYVFIVLRADDNGEGGTFALYSLLCRHARVNSLPSCQVADEELYEYKKDNIGLAPSSNFGARLKSTLEKHRVLQRFLLVLALIGTCMVIGDGVLTPAISVFSAVSGLELSMSNEHHKYVEVPVACIILIGLFALQHYGTHRVGFLFAPVVLTWLLCISAIGVYNIVHWNPHVYQALSPYYMYKFLRKTQRGGWMSLGGILLCITGSEAMFADLGHFSQLSIKIAFTSLVYPSLVLAYMGQAAYLSKHHFVDNDYRIGFYVSVPDKLRWPVLVIAILAAVVGSQAIITGTFSIIKQCSALGCFPRVKIVHTSSKIHGQIYIPE…
16	311	Dicotyledons	Malpighiales	Cassava	Manihot esculenta	15	MeHAK15	II:c	>Mesculenta|cassava4.1_001981m.g|cassava4.1_001981m	MDLGHGKCWDTSKKDSWKTLLVLAYQSLGVVYGDLSTSPLYVYKSTFAEDIHHSDSNEEIFGVLSFVFWTLTLVPLFKYVFVVLRADDNGEGGTFALYSLICRHAKVSLLPNRQAADEALSTYKTEHLPEKNNKSGVKIYLEKHKALHTALLILVLLGTCMVIGDGVLTPAISVFSAVSGLELSMSKEHHQYAVVPITCFILVCLFALQHYGTHRVGFFFAPIVLTWLLCISALGLYNIIYWNPHVYQALSPYYMFKFLKKTRKGGWMSLGGILLCITGSEAMFADLGHFSYAAIQIAFTFLVYPALILAYMGQAAYLSQHHHNDNHIGFYISVPEKLRLPVLIIAILASVVGSQAIITGTFSIINQSQSLCCFPKVKVVHTSDEMHGQIYIPEINWIL…
16	312	Dicotyledons	Malpighiales	Cassava	Manihot esculenta	16	MeHAK16	II:c	>Mesculenta|cassava4.1_029202m.g|cassava4.1_029202m	MDPAGNPDDTYSIRHKKETWRHTLMLSFQSLGVVYGRLSTAPLYVFGTIPTEDFQSDSAFEYFSFIFWTLTAISLLKYAFLVLRADDNGEGGTFALYSLLCRHAKVGLLPDDRSTKEVMHHERGSPLRIKAESRARRAIEKYRSSHYLLLFSALFGACLHYGTRKIGFIFAPIVTIWILFIGGVGLYNIFHWNPKILGAISPVFMFKFVRNIDKKSWKSLGSILLCVAGSEAMFADLGHFSKKSIQITFACLVYPLLVFCYAGQAAYISKHLHASEDFNHLSKSVPVIGSQATITASFSIIKQCLALGCFPRVKVVHTSNNLHGQVYIPDVNWLLMVLSLTVTIGFHDLHRIATSVACMLNFHKGGWYLLVISAVTFTVMLAWHYGTKKKYEFDLQNKV…
16	313	Dicotyledons	Malpighiales	Cassava	Manihot esculenta	17	MeHAK17	IV	>Mesculenta|cassava4.1_002520m.g|cassava4.1_002520m	MEEVELGAATGSPATMNEVVVDSTSTGFTQRGYQYQPKESGRWGTLVLAYKTLGVVFGGLVTSPLYVYPSMPLNSPTEEDYLGVYSIMFWTLTLIGVVKYSGIALKADDHGEGGTFALYSLLCRNINIGILSSKHVKSNASFSISALQGGTENKCRLGKFFESSIVSRRLLLFIAMLGTCMLIGDGILTPAISVLSAMDGIRAPFPAVKKSLVEALSAIVLVVLFLLQKFGTSRVSFLFSPIMGAWTLCTPLVGIYSIIRHYPSIFKAISPHYIVNYFWRNGKNGWLSLGGTILCITGSEAMFADLGHFNRTSIQLAFLFTIYPSLVLTYAGQTAYLIRNPNDHKDGFYKFIPGTIYWPIFVIATLAAIVASQSLISATFSVIKQSVVLDYFPRVKVVH…
16	314	Dicotyledons	Malpighiales	Cassava	Manihot esculenta	18	MeHAK18	II:a	>Mesculenta|cassava4.1_001999m.g|cassava4.1_001999m	MEPESGLRSPSNPSQLSWVNLSRNLILAYQSFGVVYGDLSTSPLYVYTSTFFGNLQNHQNEEAIFGAFSLIFWTLTFLPLIKYVFILLGADDNGEGGTFALYSLLCRHAKFSLLPNQQAADEELSAYKYGPTAHVTSSSALKRFLEKHKTLRTALLVVVLFGACMVIGDGVLTPAISVLSSVSGLEAYETKLTKGEVLLLACVILVGLFALQHFGTHRVAFMFAPIVIIWLVSIFSIGLYNTIHWNPKIVRAISPHYMIKFFGQTGKDGWISLGGILLSITGTEAMFADLGHFTASSIRIAFAFVIYPCLVVQYMGQAAFLSKNVDSIKNSFYASIPKPVFWPVFVIATLAAIVGSQAVITATFSIVKQCHALGCFPRVKVVHTSKHIYGQIYIPEINW…
16	315	Dicotyledons	Malpighiales	Cassava	Manihot esculenta	19	MeHAK19	I:b	>Mesculenta|cassava4.1_002112m.g|cassava4.1_002112m	MSENNIVQSVTIEDSSDQFSKPLSAKKLSSQKLRRNDSLEIESRKFPGSQLHGSKAVSWSVILHLAFQSIGIVYGDIGTSPLYVYSSTFTDGIRHNDDILGVLALILYTITLIPLVKYVLIVLRANDNGDGGTFALYSLICRYAKVGLIPSEQAEDHDVSNFQLELPSKSMRRATKLKSKLENSQFAKFFLLFATMLGTSMVIGDGVLTPCISVLSAVGGIKQATTKMTDDMIVWISVAILICLFMVQRFGTDKVGYTFAPIICVWFTMIGCIGVYNFFKYDPSVIKGLNPKYIVDYFKRNKDKAWISLGGVVLAITGTEALFADVGHFTVRSIQISMCTVTYPALICAYTGQAAFLRKHNDLVPDTFYKSIPDPLYWPMFVVAVLASIIASQAMISGT…
16	316	Dicotyledons	Malpighiales	Cassava	Manihot esculenta	20	MeHAK20	I:b	>Mesculenta|cassava4.1_031887m.g|cassava4.1_031887m	MAGLEEERLSIEEQQKQEQCGRGTSLTKQRSFDLEADGVTTYTDRHKKDWRTILKLAFQCIGVVYGDLGTSPLYVLPGIFPDGAENKEDVLAVLSLIIYSIIIISLIKYVFIVLSANDNGDGGTFALYTLICRHAKVSLIPTQQAEDKEVSTYKLDLPKHSTKMASALKTSLESSLIIKYSLLFTTMVGVSMVLGDGILTPCISVLSAVGGIKEAVPNLSEDVIMWISVVILILLFQVQRFGTHKVGYSFAPILVLWFAFIASIGLFNFIKHDPGVIKAVNPWHIVKYFQRKKKNAWISLGGVVLCLTGSEALFADLGHFHIHSIRLSSCALIVPSVLLAYMGQCSYLSKNTEDAANSFYKSIPKALYWPQFVLAVLASIIASQSLISASFSIIQQSVA…
16	317	Dicotyledons	Malpighiales	Cassava	Manihot esculenta	21	MeHAK21	II:a	>Mesculenta|cassava4.1_002000m.g|cassava4.1_002000m	MEPESGLRSPSNPSQLSWVNLSRNLILAYQSFGVVYGDLSISPLYVYTSTFTGKLQNHQNEEAIFGAFSLIFWTFTLMPLIKYVFIILSASDNNEGGTFALYSLLCRHGKFSLLPNQQAADEELSTYKYGPTAQLARTSVLKRFLEKHKMLRTALLIVVLFGACMVIGDGILTPAMSVLSSMSGLEFYESRLTKGEVLLLVCIILVALFALQHCGTHKVAFMFAPIVIIWLASIFSIGLYNIIYWNPKIVRAISPHYIIKFFVQTGKDGWISLGGILLSITGTEAMFADLGHFTALSIRIAFVFVIYPCLVVQYMGQAAFLSKNLGALKNSFYDSIPEPVFWPVFVIATLAAIVGSQAVITATFSIVKQCHALGCFPRVKIVHTSKHIYGQIYIPEINW…
17	318	Dicotyledons	Malpighiales	Jatropha	Jatropha curcas	1	JcHAK1	I:a	Jcr4S02357.60 815 0.0	MAEEEALETSEVGEHAENKLKDRKFSWAKLRRVDSLDVEAGRVSAPKSHLSNEADWRRTLILAFQSIGVVYGDIGTSPLYVFESTFPDNIHTKDDIYGSLSLIIYSLALVPLLKYVFIVLRANDNGDGGTFALYSLLSRYAKVSLIPNDQPEDRQLSHYNLEIPSKQLRRSEMVKKKLEDSKTIKLLLFLTTILGTSMVIGDGILTPCISVLSAVSGISSLSQDAIVGISIVILVVLFSIQRFGTDKVGVSFAPVITLVVFVPHWHXNGKKGWISLGGVVLCITGTEAMFADLGHFNLHAIQISFSFIAFPALLSAYAGQAAYLTKFPEHVSETFYKSIPGKSTIEPEMRNFLSAAIIASQAMISAAFAIISQSLSLGCFPRVKVIHTSTKYEGQVYIP…
17	319	Dicotyledons	Malpighiales	Jatropha	Jatropha curcas	2	JcHAK2	V	Jcr4S02827.10 684 0.0	MEEDRIEESSVRLLSATNSSSGGGGGGGAEFRWVDGSEVDSESPPWSLLDENDNNSGAGYGSIRRRLVKKPKRADSFDVEAMEIAVAHGHGDSLKDLSTWSTLALAFQTLGVVYGDMGTSPLYVFADVFSKVTIESEVDVLGALSLVMYTIAIIPLAKYVFVVLKANDNGEGGTFALYSLISRYAKVSMLPNRQPADEQISSFKLKLPTPELERALKIKDALERRSSLKTMLLLLVLMGTSMVIGDGILTPAISVMSAISGLQGEIPGFGTTALVVVSIVVLVALFSIQRFGTGKVSFLFAPVLALWFFSLASIGLYNLVTHDISVLRALNPTYIYLFFKKNSVDAWSALGGCVLCITGAEAMFADLGHFSVKAIQIAFSGVVFPCLLLAYMGQASYLM…
17	320	Dicotyledons	Malpighiales	Jatropha	Jatropha curcas	3	JcHAK3	I:b	Jcr4S00522.40 659 0.0	MGEVEEVQELDDNHQQNGQGKGLIKKEKDSFDMEAGGSNSSYRNRQVADWTTVLKLAFQCIGIVYGDLGTSPLYVLPGVFQDGIKHSDDLLGVLSLIVYSIVTISLIKYVFIVLSANDNGDGGTFALYSLICRHARVSLIPTQQAEDKEVSTYKFDLPNRRSVKMASYAKSWLENRNVMKYVLLLTTIIGVSMLLGDGILTPCISVGGLKVAIPSLTEDTIMWISVVILIFLFQLQRFGTHKVGYSFAPILVLWFLLIGIIGIYNFLKYDPSVIKALNPWCIIQYFQRNKKEAWISLGGVVLCLTGSEALFADLGHFNIRSIQLSSSVVLVPSVLLAYFGQCSYLRKHNADFASAFYSSIPKALYWPQFVLAILAAIIASQSLISASFSIVQQSLALGC…
17	321	Dicotyledons	Malpighiales	Jatropha	Jatropha curcas	4	JcHAK4	I:b	Jcr4S01281.40 646 0.0	MSDQSNIIQRNNNNEGDQHDKPLNGKKLSWQKLRRADSLEIESRSFNGHGIHGSKAVSWSVILHLAFQSIGIVYGDIGTSPLYVYSSTFTDGIRHNDDILGVLSLIIYTITLIPLVKYVLIVLRANDNGDASDVLSREKLCSPVRSAIRAESGNDPRGTFALYSLICRYAKVGLIPSQEAEDRDVSNFRLELPSRRLRRATKVKTKLENSKFAKFFLLFATMLGTSMVIGDGVLTPCISVLSAVGGVKQATTKMTDNMIVWISVVILIGLFMVQRFGTDKVGYTFAPIICVWFAMIGGIGVYNFIKYDPTVLKSLNPKYIVDYFRRNKDKAWISLGGVVLAITDPLYWPMFVVAVLASIIASQAMISGTFSIIQQSLSLGCFPRELLLVFRSTARIGNA…
17	322	Dicotyledons	Malpighiales	Jatropha	Jatropha curcas	5	JcHAK5	II:b	Jcr4S01512.20 583 e-166	MVRESVSAIRQSRRQLYKRTLLLAYQSFGVVYGDLCTSPLYVYKSTFSGSLRLYEEDHEIFGVLSLVFWTLTIIPLCKYIIFVLDANDNGEGGTFALYSLLCRHSKIGFLNSSHMGHECVSSYDFSMPTKESKTSLLIKEFFENNLSSRIVLLLIVLLGTSMVIGDGILTPTMSVLSAVYGIQIKVPNLHENYTVAIACVVLVGLFALQHYGTHRVGFLFAPILLAWLLCLAGVGIYNIFNWNPGVINALSPYYIYKFFQKAGKTGWSSLGGIILCVTGTEAMFADLGHFSQLSLRIAFTGVVYPCLVLAYMGEAAYLSKHKEDLQRSFYKAIPEVIFWPVFLIATLATIAGSQAVISATFSIISQSRALSCFPRVKIIHTSKNIHGRIYIPEVNWTLM…
17	323	Dicotyledons	Malpighiales	Jatropha	Jatropha curcas	6	JcHAK6	III	Jcr4S00399.40 556 e-158	MEMTSRTEINDHSDDNRGSMWDLDQKLDQPMDEEAGRLRNMYREKKFSLLLLLRLAFQSLGVVYGDLGTSPLYVFYNTFPRGIKDPEDVIGALSLIIYSLTLIPLLKYVFIVCKANDNGQGGTFALYSLLCRHANVKTIPNQHRTDEDLTTYSRSTFHEKSFAAKTKQWLERQYSRKNALLILVLVGTCMVIGDGILTPAISVLSAAGGIKVDHPNISSDVVIVVAVVILVGLFCMQHYGTDKVGWLFAPIVLLWFLLIGGIGIFNIWKHDTSVLKAFSPVYIYRYLRRGGKDRWTSLGGVMLSITGTEALFADLSHFPVSAVQIAFTVIVFPCLLLAYSGQAAYLMQNRDHVAEAFYRSIPVQVGLRYPVCYFQDELDGIYWPMFIVATAAAIVASQA…
17	324	Dicotyledons	Malpighiales	Jatropha	Jatropha curcas	7	JcHAK7	II:a	Jcr4S02898.30 553 e-157	MEPESGLHSPRNPSQLAWINLSRNLLLAYQSFGVVYGDLSTSPLYVFTSTFKGKLQNHLNEEVMITVKVRTSLSWIDIPSSKSQFHTIADVFLFPSGGTFALYSLLCRHAKFSLLPNQQAADEELSTYKYGPSRQSAGSSALKRFLEKHKRLRTALLVVVLFGACMVIGDGVLTPAISVLSSVSGLAVTEHKLTKGELVLLACVILVGLFALQHCGTHRVAVLFAPIVIIWLLSIFSVGLYNIIHWNPKILRALSPHYIIKFFGQTGKDGWISLGGVLLSMTGTEAMFADLGHFTASSIRIAFAFVIYPCLVVQYMGQAAFLSKNPESFNNSFYDSIPQPVFWPVFIIATLAAIVGSQAVITATFSIVKQCHALGCFPRVKVVHTSKHIYGQIYVPEIN…
17	325	Dicotyledons	Malpighiales	Jatropha	Jatropha curcas	8	JcHAK8	II:c	Jcr4S01489.10 463 e-130	MDLETGIYQNRLKGDSWKAVLTLAYQSLGVVYGDLSTSPLYVYKSTFADDIEHSETNEEIFGVLSFVFWTLTLVPLLKYVFIVLRADDNGEGGTFALYSLLCRHARVNSLPSCQVADEELYEYKKDNIASTPNSTIGARLKSTLEKHRVLQRFLLVLALIGTCMNHLDNASFYFEYWRLVLPYRFQLLDVEVPVACIILIGLFALQHYGTHRVGFLFAPVVLTWLLCISAIGVYNIIHWNPHVYQALSPYYMYKFLRKTQRGGSEAMFADLGHFSQLSIKIAFTSLVYPSLVLAYMGQAAYLSKHHFDGNDYRIGFYVSVPDKLRWPVLVIAILAAVVGSQAIITGTFSIIKQCSALGCFPRVKIVHTSSKIHGQIYIPEINWTLMLLCLAVTIGFRDT…
17	326	Dicotyledons	Malpighiales	Jatropha	Jatropha curcas	9	JcHAK9	II:a	Jcr4S03363.30 452 e-127	MVEPKPRRKHFLLLAYQSFGIVFGDLSTSPLYVYKSIFSGGPRHYQTEDTVFGAFSVIFWTLTFFSLFKYAVFMLSVDDNSEGGIFSLYSLLCRHAKYCLLPNQQAADEELTTYHSEGNLNRNVPSSSFKKSAERRKKTRTAMLLVILFGASLVISIGVLTPAISILSSVEGLQLQDKNLHHGMVVLIACIVLIGLFVLQYSGTHRVAFIFAPIVILWLLSIAIIGAYNIIHWNRRVYLALSPHYIYKFFRNTGIDGWISLGGILLCITGTEVMHAELGQFTASSVRVAFSFVVYPCLVLQYMGQAAFISKNFSSVSMSFYSSIPDSLFWPVLVMAILATIVASQAVVCATFSIVKQCHAFGCFPRIKIVHKPEWLDRQIYIPEINWILMVLCLTVTVG…
17	327	Dicotyledons	Malpighiales	Jatropha	Jatropha curcas	10	JcHAK10	IV	Jcr4S00381.60 447 e-125	MEGGGAAAAMGLREVVVDSTSPHILNTHLIQYHNGFTPPKCHTKEKGWWRTVVLAYKTLGVVFGGLVTSPLYVYPSMPLKSPTEEDYLGIYSIMFWTLTLIGVVKYCCLALMADDHGEGGTFALYSLLCRNINIKILSSKRVESSSRSVSHEGIGRTCMLIGDGILTPAISVLSAMDGVRAPFPSVKKFFAIGLVPHEIKKLLVYDAAALVEVLSAVILVVLFLLQKFGTSRVCFLFSPIMGAWTLCTPLVGTYSILRHYPSIFKALSPHYIFHYFWRNGKEGWLSLGGTILCITGSEAMFADLGHFNRSSIQIAFLFTIYPSLVLTYAGQTAYLIKNPNDHNDGFYKFIPHKVYWPIFVISTLAAIVASQSLISATFSVIKQSVVLDYFPRVKVVHTS…
17	328	Dicotyledons	Malpighiales	Jatropha	Jatropha curcas	11	JcHAK11	II:c	Jcr4S00645.30 435 e-122	MDHLGSPGMCSAGLKKETWRHTVILSFQTLGVVYGRLVTAPLYVFGTIHVNDFQSDQTAYEYFSFIFWTLTIISLLKYAFIALRADDNGEGGTFALYSLLCRNAKVGLLPDDRTTNEATHHQKGSPLRIKVESRARRAIEKHKSSHYLMLFSALFGACMIIGDAVLTPSISVLSASSGLQRTLSKIKYSSSLKKQQSISDALERYVPVPFACAVLVCFFMLQHYGTHKIGFMFAPIVTVWLLFISGMGIYNIFYSNPKILGAISPAYMYRFVQNIDKRSWRSLVSILLSVAGKIRDHVCRYGSFLQEIDPGNEITMNTCFVFCYAGQAAYISKHLHDSDDFNHLSKSIPKHLGHVFIFLSLLASVIGSQATITASFSIINQCLALGCFPRVKVIHTSDS…
17	329	Dicotyledons	Malpighiales	Jatropha	Jatropha curcas	12	JcHAK12	II:c	Jcr4S00073.50 385 e-107	MFKFLKKTRKGGWMSLGGILLCITGSEAMFADLGHFSYAAIQIAFTFLVYPALILAYMGQAAYLSQHHDNNNHIGFYISVPEKLRLPVLIIAILASVVGSQAIISGTFSIINQSQSLGCFPKVKVVHTSDEIHGQIYIPEINWILMILCIAVTIGFRDTKHMGNASGLAVMTVMLVTTCLTSLVIIVCWNKPPILALAFLLFFGTVELLYFSASLTKFTEGAWLPILLALFLMTIMFVWHYATIKKYEFDLHNKVSLDWLLALGPSLGIARVPGIGLVFTDLTSGIPANFSRFVTNLPAFHRILVFVCVKSVPVPHVPPAERYLVGRVGPPSHRSYRCIVRYGYRDVHQDVDSFESELVARLADFIKYDCHRRHGSDSCTDDDAPRSNESTSECRLAVI…
18	330	Dicotyledons	Malpighiales	Castor bean	Ricinus communis	1	RcHAK1	II:c	>Rcommunis|27791.t000001|27791.m000083	MVRRSASIWSCSSCYSIFHLNCIKKWARAPTSIDLSAEKNQGFNWRCPGCQSVQLTSSKEIRYACFCRKRIDPPSDLYLTPHSCGEPCGKPLERGIPGLGESNEDLCPHVCVLQCHPGPCPPCKAFAPPRVCPCGKKVITTRCSDRRSVLTCGQRCDKLLQCSRHRCEKICHMGPCDPCQVLVNASCFCKKSVEVVLCGEMAIKGEVKAEDGVFSCNSICGKKLGCGNHLCGETCHPGSCGDCYLTPDRVTSCYCGKTSLEVERKCCLDPIPNCTQTCGKLLPCKIHHCKEVCHAGDCSPCLVLVTQRCRCGSTSRTVECFKTRVESEKFTCDKPCGRKKNCGRHRCSERCCPLSNPNSLLSGDWDPHFCQMACGKKLRCGQHSCESLCHSGHCPACLE…
18	331	Dicotyledons	Malpighiales	Castor bean	Ricinus communis	2	RcHAK2	I:b	>Rcommunis|28359.t000002|28359.m000274	MVGINEETQRAAQQEEQSGDHQRSGHVKNLVKIDLFDLEVASGGGTNTRKVADWATILKLAFQCIGVVYGDLGTSPLYVIPGVFPDGIKEKDDLIGVLSLIIYSIIFISFIKYVIVVLAANDNGDGGTFALYSLICRHAKVNLIPNQQVEDKELSNYKLEVPDRRAKMASAIKSLLEKSCVMKYFMSFLSMLGVSMVLGDGILTPCMSVLSAVGGIKEANSSLNDDTIMWISVVILILLFQVQRFGTDKIGYSFAPILLVWFIFIACIGVFNFFKYDPGVIKAINPWYIVQYLQRNRNDIWVTLGGVVLCLTGSEALFADLGHFNIRSIQLSTCVVVIPSILLCYIGQVSYLREHTGDAYNAFYSSIPKPVYWPQFVLAVLASIIASQSLISAAFSIIQ…
18	332	Dicotyledons	Malpighiales	Castor bean	Ricinus communis	3	RcHAK3	II:c	>Rcommunis|28428.t000001|28428.m000039	MTKLMFYFCVQKESWKTVLTLAYQSLGVVYGDLSTSPLYVYKSTFAEDIQHSETNEEIFGVLSFVFWTLTLVPLLKYVFIVLRADDNGEGGTFALYSLLCRHARVNSLPNCQVADEELYEYKKDSLSPIPNSSFGGRLKSTLEKHRVLQRFLLVLALIGTCMVIGDGVLTPAISVFSAVSGLELSMAKEHHKYVEVPVACIILVALFALQHYGTHRVGFLFAPVVLTWLLCISTIGIYNIVHWNPHVYQALSPYYMYKFLTKTQRGGWMSLGGILLCITGSEAMFADLGHFSQLSIKIAFTSLVYPSLVLAYMGQAAYLSKHHFEDRDYRIGFYVSVPGKLRWPVLVIAILAAVVGSQAIITGTFSIIKQCSALGCFPKVKIVHTSSKIHGQIYIPEIN…
18	333	Dicotyledons	Malpighiales	Castor bean	Ricinus communis	4	RcHAK4	V	>Rcommunis|28610.t000006|28610.m000075	MEGDRIEESSVRLLGSSTSSGGGGGGGGESSRWVDGSEVDSESPPWSLLDENDSRDGYGSMRRRLVKKPKRTDSFDVEAMEIAGAHGHHSKDLSTWSILAMAFQTLGVVYGDLGTSPLYVFADVFSKVTIESEIDILGALSLVMYTIALIPLAKYVFVVLKANDNGEGGTFALYSLICRYAKVSMLPNRQQADEKISSFRLKLPTPELERALNIKDALERRSTLKTMLLLLVLMGTSMVIGDGILTPAISVMSAMSGLQSQVRGFGTTALVVVSIIVLVILFSIQRFGTGKVSFMFAPILALWFFSLASIGIYNLVTYDISVLRAFNPAYIYLFFKKNSVKAWSALGGCVLCITGAEAMFADLGHFNVKAIQIAFSFVVFPCLLLAYMGQASYLMKYPQ…
18	334	Dicotyledons	Malpighiales	Castor bean	Ricinus communis	5	RcHAK5	V	>Rcommunis|29581.t000005|29581.m000257	MAEENGVGSGSIGGGSDRLGSMDSIESRWVFQDDDDDSVVDDEDDDDDGDEDDNHRLTGGVVDSEDEDDNAEQRLIRTGPRIDSFDVEALEIPGAQRNDYEDFTLGRKIILACQTLGIVFGDVGTSPLYAFDVMFTKAPIKGEEDVLGALSLVLYTLILIPLIKYVLVVLWANDDGEGGTFALYSLICRHAKVSLLPNQLPSDARISSFRLKVPSPELERSLKIKERLETSQTLKKLLLILVLAGTAMVIADGVVTPAMSVMSAVGGLKVGVAAIEQEQVVMISVAFLVILFSVQKFGTSKVGLAVGPALFIWFCSLAGMGIYNLVKYDSTVLRAFNPVHIYYFFKRNSTKAWRALGGCLLCATGSEAMFADLCYFSVRSIQLTFLLLVLPCLLLGYLG…
18	335	Dicotyledons	Malpighiales	Castor bean	Ricinus communis	6	RcHAK6	I:b	>Rcommunis|29685.t000004|29685.m000482	MSQNTVQNTSSTSGETRDEFSKSLNGKKLSRHKLRRSDSLEIESRTFHGHRVYGSKDGVSWSVILQLAFQSIGIVYGDIGTSPLYVYASTFTEGIKHNDDVLGVLSLIFYTLTLIPLIKYVLIVLRANDNGDGGTFALYSLVCRYAKVGLIPSQQSEDLDVSNFQLELPSRRLSRASKLKSKLENSKFAKFFLLFATMLGTSMVIGDGVLTPCISVLSAVGGIKQATTKMTDDMIVWISVVILILLFMVQRFGTDKVGYSFAPIICVWFAMIAGIGLFNFFKYDPAVIKAINPKYIVDYFRRNKDQAWISLGGIVLAITGTEALFADVGHFTVPSIQISMCTVTYPALICAYTGQAAFLRKHNDLVLETFYESIPKPLYWPMFGVAVMASIIASQAMIS…
18	336	Dicotyledons	Malpighiales	Castor bean	Ricinus communis	7	RcHAK7	II:c	>Rcommunis|29729.t000081|29729.m002348	MDLRHGKCWDSSKKESWKTLLVLAYQSLGVVYGDLSTSPLYVYKSTFAEDIRHSETNEEIYGVLSFVFWTLTLIPLFKYVFVVLRADDNGEGGTFALYSLICRHVKVSLLPNRQAADEALSTYIMEHPPEKKNSRVKTYLEKHKGLHTALLILVLLGTCMVIGDGLLTPAISVFSAVSGLELSMSKEHHQYAVIPITCFILVCLFALQHYGTHRVGFFFAPIVLTWLLCISALGLYNIIHWNPHVYQALSPYYMFKFLKKTREGGWMSLGGILLCITGSEAMFADLGHFSYAAIQIAFTFLVYPALILAYMGQAAYLSQHHDDNNHIGFYISVPEKLRFPVLIIAILASVVGSQAIISGTFSIINQSQSLSCFPKVKVVHTSDEIHGQIYIPEVNWMLM…
18	337	Dicotyledons	Malpighiales	Castor bean	Ricinus communis	8	RcHAK8	IV	>Rcommunis|29780.t000066|29780.m001380	MEAREAGAATYTAETLREVVVDDCTSIANAHLLHFRNGFTPPISGHHAKEKGRWETFVLAYKTLGVVFGGLVTSPLYVYPSMPLNSPTEEDYLGIYSIMFWTLTLIGVVKYSYIALKADDHGEGGTFALYSLLCRNINIRILSSKHGEPSLNFSNSVLHESAENKCRLGKFFERSLVARRVLLFIAMLGTCMLIGDGILTPAISVLSAMDGVRAPFPSVKKSLVEALSAAVLIVLFLLQTFGTSRVSFVFSPIMGAWTLFTPLVGIYSITQHYPGIFKALSPHYIFHFFWRNGKEGWLKLGGTILCITGSEAMFADLGHFNRRSIQMAFLFTIYPSLVLTYAGQTAYLIKHPNDHKDGFYKFIPQKIYWPIFVVATLAAIVASQSLISATFSVIKQSVV…
18	338	Dicotyledons	Malpighiales	Castor bean	Ricinus communis	9	RcHAK9	II:c	>Rcommunis|29822.t000039|29822.m003364	MDLEGRDSWKTVLTLAYQSLGVVYGDLSTSPLYVYKSAFAEDIQHSETNEEIYGVLSFVFWTLTLIPLVKYVFIVLRADDNGEGGTFALYSLLCRHARVSSIPNCQLADEELSEYKKDGSVFNDKSGIGSSLKSTLEKCRILQRLLLVLALIGTCMVIGDGVLTPAISVFSAVSGLELSMSKEQHQYVELPVACAILVFLFSLQHYGTHRVGFLFAPVVITWLLCISAIGVYNILHWNPHVYQALSPYYMYKFLKKTQRGGWMSLGGILLCITGSEAMFADLGHFSQLSIKIAFTFVVYPSLILAYMGQAAYLSKHHIIESDYRIGFYVSVPEKIRWPVLAIAILAAVVGSQAIITGTFSIIKQCSSLGCFPKVKIVHTSSKMHGQIYIPEINWTLMLL…
18	339	Dicotyledons	Malpighiales	Castor bean	Ricinus communis	10	RcHAK10	III	>Rcommunis|29840.t000019|29840.m000621	MPESPSFFIYFLSAVLSAVQGIKLDQPKMTSDVVVLVAVVILVGLFCMQHHGIDRVGWLFAPVVLLWFLLIGGIGIFNIWKYDKGVLKAFSPVYIYRYFKRGGRDNWLSLGGIMLSITGTEALFADLSHFPVSAIQIAFTAIVFPCLIFAYSGQAAYLMKNSNHVVDAFYRSIPDGIYWPVFIVATAAAVVASQATISATFSLVKQALALDCFPRVKIVHTSKKFLRQIYIPDINWILMILCVAVTAGFKNQSQIGNASGTAVVIVMLVTTLLMILIMLLVWRCHWILVLIFTGLSLVVEGTYFSSVLCKVNQGGWVPLVIAAAFFIIMYAWHYGTLKRYEFEMHSKVSMAWIVGLGPSLGLVRVPGIGLVYTELARGVPHIFSHFITNLPAIHSVVVF…
18	340	Dicotyledons	Malpighiales	Castor bean	Ricinus communis	11	RcHAK11	I:a	>Rcommunis|30128.t000265|30128.m008804	MEENTSWEEKNTTETENNFKEGKTSWENLRRVDSMNLEAGRLTMSHAHHSDKVDWRITLSLAFQSIGVVYGDIGTSPLYVYGSTFTNGIGVKEDILGVLSLIIYTIILLPLLKYVFIVLRANDNGDGGTFALYSLLARYAKVSLIPNDQPEDRQLSNYSLQIPSKQLSRAENIKNKLENSKTIQLVLFLITILGTSMVIGDGILTPCISVLSAVGGIKSLGQDAVVGISIAILVILFSVQRFGTDKVGLSFAPIIVLWFLFISVIGLYNLFKYDLSVLGALNPKYMFDYFKRNGKQGWISLGGVVLCVTGAEAMFADLGHFNVKAIQISFSGVVFPALLCAYAGQAAYLTKFPEDVSDTFYKSIPGPLYWPTFVVAVAAAIIASQAMISGAFTIISQSL…
18	341	Dicotyledons	Malpighiales	Castor bean	Ricinus communis	12	RcHAK12	II:a	>Rcommunis|30131.t000100|30131.m006949	MEPESGLRSPSNPSQLSWVNLSRNLILAYQSFGVVYGDLSTSPLYVFTSTFAGKLRNHHNEEVIFGAFSLIFWTLTLIPLTKYVFILLSADDNGEGGTFALYSLLCRHAKFSLLPNQQAADEELSTYKYGPSGQSSGSHALKRFLEKHKRLRIALLVVVLFGACMVIGDGVLTPAISVLSSVSGLEVTETKLTKGELVLLACVILVGLFALQHCGTHRVAFMFAPIVIIWLLSIFSIGLYNILYWNPKIIRAISPYYIIKFFGVTGKDGWISLGGILLSITGTEAMFADLGHFTALSIRLAFAFVIYPCLVVQYMGQAAFLSRNPTSIKNSFYDSIPEPVFWPVFIIATLAAIVGSQAVITATFSIVKQCHALGCFPRVKVVHTSKHIYGQIYIPEINW…
18	342	Dicotyledons	Malpighiales	Castor bean	Ricinus communis	13	RcHAK13	II:b	>Rcommunis|30169.t000108|30169.m006331	MEERKMDEVSGSNIRESRLKLYKTTLLLAYQSFGVVYGDLCTSPLYVYKSTFSGSLQLYEEDHEIFGVLSLVFWTLAIIPLCKYIIFVLGADDNGEGGTFALYSLLCRRSKMGFLLSSHMGLECVSSHDSSLPARETRTSLIIKEFFEKHHSSRIVLLLVVLLGTSMVIGDGILTPTMSVLSAVYGIQIKLPNLHENYTVVIACVVLVGLFALQHYGTHRVGFVFAPILLAWQLCLGGIGIYNIFHWNPGVINALSPHYIYKFFQRAGKSGWSSLGGIILCVAGAEAMFADLGHFSKLSLRIAFTVVVYPCLVLAYMGEAAYLSKHKEDLQRSFYKAIPEAIFWPVFLIATLATMVGSQAIISATFSIISQCRALGCFPRVKIVHTSKNIHGQIYIPEV…
18	343	Dicotyledons	Malpighiales	Castor bean	Ricinus communis	14	RcHAK14	II:a	>Rcommunis|30190.t000578|30190.m011342	MVESKTPRKHVLLLAYQSFGIVFGDLSTSPLYVYKCIFSGRLRRYQTEDTVFGAFSLIFWTLTFFSLFKYVVLMLSVDDNGEGGIFALYSLLCRHAKFCLLPNQQVADEELSAYYSEGHSNRNVAPSQSKKVVERRKKTKTALLLVVLFGASMVIAIGVLTPAISVLSSIEGLQLQANNLHHGMVVLIACIVLIGLFVLQYRGTHRVAFMFAPIVILWLLSIAIIGAYNIIHWNTRIWQALSPYYIYKFFRDTGKDGWISLGGVLLCITGTEVMYAELGQFTASSLRVALFFVVYPCLVLQYMGQAAYVSKNLSAVSMSFYSSIPDSLFWTVFVMAILATIVASQAVVCATFSIVKQCQAYGCFPRIKIVHKVKWLDRQIYIPEINWILMILCLAVIVG…
19	344	Dicotyledons	Malpighiales	Flax	Linum usitatissimum	1	LuHAK1	II:c	>Lusitatissimum|Lus10030632.g|Lus10030632	MDLETGARHNQLKKESWRTVLTLAYQSLGVVYGDLSISPLYVYKSTFAEDITHSETNEEIFGVLSFVFWTLTLVPLLKYVFIVLRADDNGEGGTFALYSLLCRHARVNSLPNRQVADEELSEYKKDYPAAEYSSSSGLKSTLEKYKVLQRILLVLALIGTCMVIGDGVLTPALSVFSAVSGVELSMSKEHHKYVELPATCIILIALFALQHYGTHRVGFLFAPVVLIWLLCISSIGLYNIVYWNPHVYKALSPYYMYKFLKKTQKGGWMSLGGILLCITGSEAMFADLGHFSQLSIKIAFTSLVYPSLILAYMGQAAYLSKHHVIESDYQIGFYVSVPDKLRWPVLVIAVLAAVVGSQAIITGTFSIIKQCSSLGCFPRVKIVHTSSKVHGQIYIPEIN…
19	345	Dicotyledons	Malpighiales	Flax	Linum usitatissimum	2	LuHAK2	II:c	>Lusitatissimum|Lus10030539.g|Lus10030539	MSQLGVGAVDSGVSKMSQGPKDSWKTLLILAYQSLGVVYGDLSISPLYVFKSTFADDIQHSQSNDEIYGVLSFVFWTLTLVPLFKYVFIVLRADDNGEGGTFALYSLLCRHAKVSLLPNRQVSDESLSTYILEHPPEKKNFCPKTFLEKHKGLHTALLILVLLGTCMVIGDGLLTPAISVFTAVSGLELSMEKHQYAVIPITCFTLVCLFSLQHYGTHRVGFLFAPVILLWLFCISALGIYNILYWNVHVYRALSPCYMYKFLKKTKKSGWMSLGGILLCITGSEAMFADLGHFSYTAIQIAFSFLVYPALILAYMGQAAYLSQHHGNASDISFYIFVPEKLRLPVLLLAILASVVGSQAIISGTFSIINQSQSLSCFPRVKVVHTSDKIHGQIYIPEI…
19	346	Dicotyledons	Malpighiales	Flax	Linum usitatissimum	3	LuHAK3	V	>Lusitatissimum|Lus10036160.g|Lus10036160	MSRKFILALQTLGVVFGDVGTSPLYTFDVVFTKASISGEEDVLGALSLVLYTLILVPLLKYVMVVLWANDDGEGGTFALYSLICRHAKVSLLPNQLPSDTRISSFRLKVPSPELERSLKIKERQENSLTLKKLLLILVLAGTSMVIADGVVTPAMSVMSAVGGLKVGVASVEQDQVVMISVAFLVILFSLQKFGTSKVGLAVGPALFVWFCSLAGIGIYNLVKYDNRVLRAFNPVYIYYFFKRDSAKAWRALGGCLLCATGSEAMFADLCYFSVRSIQLTFVLLVLPCLLLGYLGQAAYLMQNHTEVLAEQAFFSSVPSGAFWPVFLIANFAALIACRAMTTATFSCIKQSTALGCFPRLKIIHTSRKFMGQIYIPVINWFLLGMCLVFVCSIQSITEL…
19	347	Dicotyledons	Malpighiales	Flax	Linum usitatissimum	4	LuHAK4	I:b	>Lusitatissimum|Lus10025493.g|Lus10025493	MSADTITPTVDDDRNKDDDDEQVLSPQLNCNNIVAVPIKSLRRFDSLEVEAGKFADRGNHGVKEASWGVVLQLAFQSIGVVYGDIGTSPLYVYASTFGKGINHKDDVLGVLSLIIYTVTLIPLLKYVFIVLRANDNGDGGTFALYSLICRYARVGLIPSQQVEDGQVSNFQLQLPSKQLERGSRLKSMLEKSVSAKYFLLFATMLGTSMVIGDGILTPCISVLSAVGGMKEATESMTQESNMTLSDSLDSIIDIFVEMIVWISVAILIMLFGVQRFGTDKVGYSFAPIICVWFLLIGGIGCYNFIKYDPTVLKALNPKYMIDYFNRNKKEAWISLGGVVLATTGTEALFADVGHFTVRSIQISMCCVTYPALLLAYTGQASFLTKHPDLVSDTFYKSIP…
19	348	Dicotyledons	Malpighiales	Flax	Linum usitatissimum	5	LuHAK5	II:c	>Lusitatissimum|Lus10012992.g|Lus10012992	MDLETGAHHKNVQKESWRTVLTLAYQSLGVVYGDLSISPLYVFKSTFADEDIIHSETNEEIFGVLSFVFWTLTLVPLLKYVFIVLRADDNGEGGTFALYSLLCRHARVNSLPNRQVADEELSEYKKNKESCNDGSSSVHPDFPSGLKSTLEKHRVLQRILLVLALVGTCMVIGDGVLTPALSVFSAVSGVELSVSKEHHKYIELPASCIILVGLFALQQYGTHRVGFLFAPVVLIWLLCISAIGIYNILYWNPQVYQALSPYYMYKFLKKTQRGGWMSLGGILLCITGSEAMFADLGHFSQLSIKAAYLSTHHVMENDYQIGFYVSVPDKIRWPVLVIAILAAVVGSQAIITGTFSIIRQCSALGCFPKVKVVHTSSKVHGQIYIPEINWILMLLCLAV…
19	349	Dicotyledons	Malpighiales	Flax	Linum usitatissimum	6	LuHAK6	I:a	>Lusitatissimum|Lus10013304.g|Lus10013304	MDNSKLAKEMSAETRSKRSSWRKLEEEEDSGEIRNDDGLATDHLQQFPAITHKERKVSWAKLRRVDSLNLEAGLVSKTTQGGGGSHHSSHPTRDQGSSAATNWRRTISFAFQSIGVVYGDIGTSPLYVYKSTFTDGIKTNEDILGVLSLIIYTILLVALIKYVAIVLWANDNGDGGTFALYSLLCRHLRISLIPNQQPEDAQLSNYNLELPSRHPTTRLAHYVKSKMETKRGLQILMFFVTILGTSMVIGDGILTPSISVLSAVEGVSSSLGKEAVVGISVAILIVLFSVQRFGSDKVGFSFAPIIMIWFAFIAGIGAYNLFKHDVTVLRAFNPKYMVDYFTRNGKTAWISLGGIVLCITGAEAMFADLGHFNVRAIQISFAGLVCPALTIAYIGQAAY…
19	350	Dicotyledons	Malpighiales	Flax	Linum usitatissimum	7	LuHAK7	I:b	>Lusitatissimum|Lus10027004.g|Lus10027004	MATTMSADTSTPTVEDNRNKGDDDDQVLSPQLEGNNVAGVPVKSLRRFDSLEVESGKFAGRGSHCVKEASWGVLLQLAFQSIGVVYGDIGTSPLYVYASTFGNGINHGEDVLGVLSLIIYTVTLIPLLKYVFIVLRANDNGDGGTFALYSLICRYARVGLIPSQQVEDGQVSNFQLELPSKQLERGSRLKSMLEKSVSAKYFLLFATMLGTSMVIGDGILTPCISVLSAVGGMKEATDSMTQEMIVWISVAILIMLFGVQRFGTDKVGYSFAPIICVWFLLIGGIGCYNFVKYDPTVLKALNPKYMIDYFNRNKKEAWISLGGVVLATTGTEALFADVGHFTVRSIQISMCCVTYPALLLAYTGQASFLTKHPDLVSDTFYKSIPGGLYWPMFLVAVLA…
19	351	Dicotyledons	Malpighiales	Flax	Linum usitatissimum	8	LuHAK8	II:c	>Lusitatissimum|Lus10029050.g|Lus10029050	MSQPDRFRVGAMDFRFSKMSEGPKKDSWKTLMLLAYQSLGVVYGDLGISPLYVYKSTFADDIHHSESNDEIYGVLSFVFWTLTLVPLFKYVFIVLRGDDNGEGGTFALYSLICRHAKVNLLPNRQVSDESLSTYITEEPPEKKSVCMKSSLEKHKGLHTALLILVLLGTCMVIGDGLLTPAISVFTAVSGLELSMDKHQYAVIPITCFTLVCLFSLQHYGTHRVGFLFAPIILLWLFCISALGIYNIFRWNMHVYKALSPYYMYKFLKKTKKSGWMSLGGILLCITGSEAMFADLGHFSYTAIQVAFSFLVYPALILAYMGQAAYLSQHHGLASDISFYIFVPGLAVMTVMLVTTCLTSLVIVLCWHKPPILALGFLLFFGSVELLYFSASLTKFKEGA…
19	352	Dicotyledons	Malpighiales	Flax	Linum usitatissimum	9	LuHAK9	V	>Lusitatissimum|Lus10029172.g|Lus10029172	MEEEGGDRIEECSERLLESGSRKGSGGGDWIWVDGSEVDSDSPPLSLLDGSNDGSKSQGRPGGGYGGTMRRRLVKKPKRVDSFDVESMEIAGAHTHHNKEVSTLATIGLAFQTLGVVYGDMGTSPLYVFTDVFSKVPIESEIDVLGALSTVMYTIALIPLAKYVFVVLKANDNGEGGTFALYSLISRYAKVNMLPNRQPADEQISSFKLKLPTPELERALSIKELLETRPFLKTLLLLLVLMGTSMVIGDGILTPAISVMSATSGLQGEVSGFGTSRYHIMLPLVADAVVAVSIVILLALFGIQRFGTGKVGIMFAPVLGLWFFSLGAIGIFNLVAYDISVLRALNPAYIYFFFQKNGVAAWSALGGCVLCITGAEAMFADLGHFSVKSIQIAFTFVVF…
19	353	Dicotyledons	Malpighiales	Flax	Linum usitatissimum	10	LuHAK10	II:c	>Lusitatissimum|Lus10030857.g|Lus10030857	MDLETGARHNQLKKESWRTVLTLAYQSLGVVYGDLSISPLYVYKSTFAEDITHSETNEEIFGVLSFVFWTLTLVPLLKYVFIVLRADDNGEGGTFALYSLLCRHARVNSLPNRQVADEELSEYKKDYPAGEYSSSSGLKSTLEKYKVLQRILLVLALIGTCMVIGDGVLTPALSVFSAVSGVELSMSKEHHKYVELPATCIILVALFALQHYGTHRVGFLFAPVVLIWLLCISSIGLYNIVYWNPHVYKALSPYYMYKFLKKTQKGGWMSLGGILLCITGSEAMFADLGHFSQLSIKIAFTSLVYPSLILAYMGQAAYLSKHHVIESDYQIGFYVSVPDKLRWPVLVIAVLAAVVGSQAIITGTFSIIKQCSSLGCFPRVKIVHTSAKVHGQIYIPEIN…
19	354	Dicotyledons	Malpighiales	Flax	Linum usitatissimum	11	LuHAK11	III	>Lusitatissimum|Lus10038362.g|Lus10038362	MAAKSDEVANKNGRLWALDQQFDQPMDVEADCIKPQNDESKPSTFELLRLAFQSLGIVYGDLGTSPLYVFYDTFPHGIEDPEDVVGALSFIIYSLALIPLVKHAKIRTIPNQDHTNERLRTYSTSTFHEKSFAAKTKRWLERYSYTKNGLLILVIIGSSMLIGDGVFMPCISVVSAINGIKRSHHHRMSQGIGIFNIVKYTKALKAFSPVYMYRTFNGNHKDAWLSLGGVMLSIAGSEALFADISNFSVSAIQIAFLVVVFPCLILSYSGQAAYLMKHSDRVGDAFYSSIPGTAVVVVTLVTTLFVTLIMILVWRCHRIFALLFAAFFLLIEGTYFCSIILKVHQGGWVPLVIAACCFVAMYGWHYGRQKCYEFEIRVRDPRRIGAKDFHMFRCVARYG…
19	355	Dicotyledons	Malpighiales	Flax	Linum usitatissimum	12	LuHAK12	III	>Lusitatissimum|Lus10038361.g|Lus10038361	MSMDMEGGVIDGGDSESNKGSMWDLDQKLDQSMDEEAGKLKNMYREKKFSSLLLLRLAFQSLGVVYGDLGTSPLYVFYNTFPNGISDPEDVIGALSLIIYSLTLVPLIKYVFIVCRANDNGQGGTLALYSLLCRHAKVKTIPNQHRTDEDLTTYSRSTFHEQSFAAKTKRWLEGHACLLSAAGGIKVNSPKVSNDVVILVAVVILVGLFSMQHYGTDKVGLFFAPIVLLWFLLIGGIGIYNICKYDKSVLKAFYPLYVYRYLRRGGREGFLSLGGIMLSITGTEALFADLAHFPVAAIQLAFTVVVFPCLLLAYSGQAAYLMKNQEHVVDAFYHSIPDRIYWPVFLVATAAAIVASQATISATFSIIKQAHAHGCFPRIKVVHTSKKFLGQIYVPDINW…
19	356	Dicotyledons	Malpighiales	Flax	Linum usitatissimum	13	LuHAK13	II:c	>Lusitatissimum|Lus10032154.g|Lus10032154	MDLESIELSRNPIKRESWRAVLTLAYQSLGVVYGDLSTSPLYVYKSTFAEDIKHSDTNEEIFGVLSFVVWTLTLIPLLKYVFIVLRADDNGEGGTFALYSLLCRHARVTTLPNCQLADEQLSEYNRDDGSRNGRRIGSGLKSALEKSRLLQKGLLVLALIGTSMVIGDGVLTPAISVSSAVSGMELSMAKEQHQYIKLPVTCAILVSLFALQHFGTHKVGFLFAPIVIVWLLCISSIGVYNIFYWNPLVYQALSPYYMYKFLKKTKKGGWMSLGGILLCMTGSEAMFADLGHFSQLSIQIAFTFVVYPSLILAYMGQAAYLSKHHILETDYRIGFYVSVPASLIKFLDGAWVPIALSLIFLAIMYIWHYGTLKRYESDVQNKVSINWLLSLGPTLGIVR…
19	357	Dicotyledons	Malpighiales	Flax	Linum usitatissimum	14	LuHAK14	II:a	>Lusitatissimum|Lus10024709.g|Lus10024709	MMLNLLWFKQDENKARSKHFLLLVYQSIGIVFGDLATSPLYVYRSAFAGRLRHYRTEEAVFGAFSVIFWTLSFFSLFKYAVFMLNVNDNGEGGIFALYSLLCRHGKFSLLPNQQASDEELSTYQHAGYSNKSVPASSFKRITDRDKKSKLALLVLVLMGASMAMTLGVLTPAISVVSSIEGLKVQSNDLNHRIMVVIAGILLVSLFVLQYQGTHKVAFIFSPVIILWLLSSAALGVYNIILWNPRIYEALSPVYIYKFFRLTGIDGWISLGGALLCITGIDILFTDLGQFSASSIRVAYCFVVYPCLVLQYMGQAAFLSKNFSAISLSFYASVPVTLGSQDTTRIGNAYGIASMTLIFITTCLMSLAIYFVWHKGLMLAVSFFLFFGTIEIIFLFSSYV…
19	358	Dicotyledons	Malpighiales	Flax	Linum usitatissimum	15	LuHAK15	II:c	>Lusitatissimum|Lus10012888.g|Lus10012888	MSQLGVGAVDSGVSKMSQGPKKESWKTLLILAYQSLGVVYGDLSISPLYVFKSTFADDIQHSQSNDEIYGVLSFVFWTLTLVPLFKYVFIVLRADDNGEGGTFALYSLLCRHAKVSLLPNRQVSDESLSTYILEHPPEKKNFCPKTFLEKHKGLHTALLILVLLGTCMVIGDGLLTPAISVFTAVSGLELSMEKHQYAVIPITCFTLVCLFSLQHYGTHRVGFLFAPVILLWLFCISALGIYNILYWNVHVYRALSPCYMYKFLKKTKKSGWMSLGGILLCITGSEAMFADLGHFSYTAIQIAFSFLVYPALILAYMGQAAYLSQHHGNASDISFYIFVPGLAVMTVMLVTTCLTSLVIMLCWHKPPILALGFLLFFGSIELLYFSASLTKFREGAWLP…
19	359	Dicotyledons	Malpighiales	Flax	Linum usitatissimum	16	LuHAK16	II:a	>Lusitatissimum|Lus10032327.g|Lus10032327	MMLNFLLFKQDENKARSKHFLLLVYQSIGIVFGDLATSPLYVYRSAFAGRLRHYRTEEAVFGAFSVIFWTLSFFSLFKYAVFMLSVNDNGEGGIFALYSLLCRHGKFSLLPNQQASDEELSTYQHAGYSNKSVPASSFKRITDRDKKSKLALLVLVLMGASMAMTLGVLTPAISVVSSIEGLKVQSNDLNHRIMVVIAGILLVSLFVLQYQGTHKVAFIFSPVIILWLLSSAALGVYNIILWNPRIYEALSPVYIYKFFRLTGIDGWISLGGALLCITGIDILFTDLGQFSASSIRVAYCFVVYPCLVLQYMGQAAFLSKNFSAISLSFYASVPVTLGSQDTTRIGNAYGIASMTLIFITTCLMSLAIYFVWHKGLMLAVSFFLFFGTIEIIFLFSSYV…
19	360	Dicotyledons	Malpighiales	Flax	Linum usitatissimum	17	LuHAK17	III	>Lusitatissimum|Lus10036222.g|Lus10036222	MAANGDEAANKNGRLWALDQQFDQPMDVEADCIKPQNDESKPSTFVLLRLAFQSLGIVYGDLGTSPLYVFYNTFPNGIEDPEDVVGALSFIIYSLALIPLVKYLFIVSRATDNGQGGTFALYSLLCRHAKIRTIPNQDHTDERLRTYSTSTFHEKSFAAKTKRWLERYSYTKNGLLILVIIGSSMLIGDGVVIPCISVVSALNGIKLSHHHRMSQEVTMGFSVVILVALFWLQRFGTEKVSWLFAPILLVWFLSIGGIGIFNIVKYGTQALKAFSPVYMYRAFNGNHKDAWLSLGGVMLSIAGSEALFADISNFSVSAIQIAFVVVVFPCLLLSYSGQAAYLMKHSDRVGDAFYSSIPDSVYWAMTVIATAAAIVACTAVVVVTLVTTLLVTLIMILVW…
19	361	Dicotyledons	Malpighiales	Flax	Linum usitatissimum	18	LuHAK18	III	>Lusitatissimum|Lus10036221.g|Lus10036221	MSMNMEGGGIEGGNSESNKGSMWDLDQKLDQSMDEEAGKLKNMYREKKFSSLLLLRLAFQSLGVVYGDLGTSPLYVFYNTFPNGISDPEDVIGALSLIIYSLTLVPLIKYVFIVCRANDNGQGGTLALYSLLCRHAKVKTIPNQHRTDEDLTTYSRSTFHEQSFAAKTKRWLEGHACRKTALLLLVLVGTCMVIGDGILTPAISVLSAAGGIKVNSPKVSNDVVILVAVVILVGLFSMQHYGTDKVGLFFAPIVLLWFLLIGGIGIYNICKYDKSVLKAFYPLYVYRYLRRGGREGFLSLGGIMLSITGTEALFADLAHFPVAAIQLAFTVVVFPCLLLAYSGQAAYLMKNQEHVVDAFYHSIPDRIYWPVFLVATAAAIVASQATISATFSIIKQAHA…
19	362	Dicotyledons	Malpighiales	Flax	Linum usitatissimum	19	LuHAK19	V	>Lusitatissimum|Lus10003402.g|Lus10003402	MADDAGGGSANSSIVSFCAGGGSDISGRLRSMDSVESRWVFQDDDDDSVIDEEDEDSFHNRLTGLDSEDDDDDEDDNAEQRLIRTGPRIDSFDVEALEIPSAQRNEYEDFSMSRKFILAFQTLGVVFGDVGTSPLYTFDVVFTKASISGEEDVLGALSLVLYMLILVPLLKYVMVVLWANDDGEGGTFALYSLICRHAKVSLLPNQLPSDTRISSFQLKVPSPELERSLKIKERLENSLTLKKLLLILVLAGTSMVIADGVVTPAMSVMSAVGGLKVGVASVEQDQVVMISVAFLVILFSLQKFGTSKVGLAVGPALFVWFCSLAGIGIYNLVKYDNRVLRALNPAYIYYFFKRDSAKAWRALGGCLLCATGSEAMFADLCYFSVRSIQLTFVLLVLPC…
19	363	Dicotyledons	Malpighiales	Flax	Linum usitatissimum	20	LuHAK20	II:c	>Lusitatissimum|Lus10014531.g|Lus10014531	MDIESTDLSRNPIKRESWRAVLTLAYQSLGVVYGDLSTSPLYVYKSTFAEDIKHSDTNEEIFGVLSFVVWTLTLIPLLKYVFIVLRADDNGEGGTFALYSLLCRHARVTTLPNCQLADEQLSEYNRDDGSRKGRRIGSGLKSALEKSRLLQKGLLVLALIGTSMVIGDGVLTPAISVSSAVSGMELSMAKEQHQYIKLPVTCAILVSLFALQHFGTHKVGFLFAPIVIVWLLCISSIGVYNIFYWNPLVYQALSPYYMYKFLKKTKKGGWMSLGGILLCMTGSEAMFADLGHFSQLSIQIAFTFVVYPSLILAYMGQAAYLSKHHILETDYRIGFYVSVPDCCFVLDLPVIKWTFILLCLAVTVGFRNTKHMANAAGLAVITVMLVTTCLMSLVIVLCW…
19	364	Dicotyledons	Malpighiales	Flax	Linum usitatissimum	21	LuHAK21	II:c	>Lusitatissimum|Lus10034215.g|Lus10034215	MSQLDRFRVGAMDFRFSKMSEGPKKDSWKTLMLLAYQSLGVVYGDLGISPLYVYKSTFADDIHHSESNDEIYGVLSFVFWTLTLVPLFKYVFIVLRADDNGEGGTFALYSLICRHAKVNLLPNRQVSDESLSTYITEEPPEKKSVCMKSSLEKHKGLHTALLILVLLGTCMVIGDGLLTPAISVFTAVSGLELSMDKHQYAVIPITCFTLVCLFSLQHYGTHRVGFLFAPIILLWLFCISALGIYNIFHWNMHVYKALSPYYMYKFLKKTKKSGWMSLGGILLCITGSEAMFADLGHFSYTAIQVAFSFLVYPALTLAYMGQAAYLSQHHGLASDISFYIFVPEKLRVPVLILAILASVVGSQAIISGTFSIINQSQSLSCFPRVKVVHTSDKIHGQIY…
19	365	Dicotyledons	Malpighiales	Flax	Linum usitatissimum	22	LuHAK22	II:b	>Lusitatissimum|Lus10018270.g|Lus10018270	MSQLDRFRVGAMDFRFSKMSEGPKKDSWKTLMLLAYQSLGVVYGDLGISPLYVYKSTFADDIHHSESNDEIYGVLSFVFWTLTLVPLFKYVFIVLRADDNGEGGTFALYSLICRHAKVNLLPNRQVSDESLSTYITEEPPEKKSVCMKSSLEKHKGLHTALLILVLLGTCMVIGDGLLTPAISVFTAVSGLELSMDKHQYAVIPITCFTLVCLFSLQHYGTHRVGFLFAPIILLWLFCISALGIYNIFHWNMHVYKALSPYYMYKFLKKTKKSGWMSLGGILLCITGSEAMFADLGHFSYTAIQVAFSFLVYPALTLAYMGQAAYLSQHHGLASDISFYIFVPEKLRVPVLILAILASVVGSQAIISGTFSIINQSQSLSCFPRVKVVHTSDKIHGQIY…
19	366	Dicotyledons	Malpighiales	Flax	Linum usitatissimum	23	LuHAK23	III	>Lusitatissimum|Lus10018324.g|Lus10018324	MDLDRRNDEDGDSDSNKGSMWDLEQKLDQPMDDEAGKLKNMLREKKYSTLLLLRLAFQSLGVVYGDLGTSPLYVFYNTFPKGINDPEDVIGALSLIIYSLTLIPLLKYVFIVCKANDNGQGGTLALYSLLCRHANVKTIPNQHRTDEDLTTYSRSTFHEHSFAAKTKRWFEGHGSRKTSLLILVLVGTCMVIGDGILTPAISVIQSLSNQPFLAVLSAVGGIKVNSPGMSGDVVIVVAVVILVCFFSMQHYGTDKVGWLFAPIVLLWFLLIGGIGIYNICKYDRRILRAFSPVYIYQYLKRGGKDGFVSLGGIMLSITGTEALFADLAHFPVPAIQIAFTVVVFPCLLLAYSGQAAYLVKNTDHVKDAFYRSIPESIYWPVFLVATAAAIVASQATISA…
20	367	Dicotyledons	Myrtales	Eucalyptus	Eucalyptus grandis	1	EgHAK1	II:b	>Egrandis|Eucgr.B02235|Eucgr.B02235.1	MTLIALFKYIFIVMSANDNGEGGTFALYSLLCRHARLSILPNQQDVDEKLSSYAKDRTVDSQQSLALKSFLEKHPNFRTSLLIFVLLGTCMAIGDGILTPSISVLSAVSGVKLKIPELHENYVVIISCVILLGLFSLQHHGTHRVAFLFAPVVMAWLLCICCIGIYNIFRWNTRIIHALSPVYILKFLRNTGTEGWVSLGGVVLSITGVDAMFTDMGHFSPVSIRVAFTVLVYPSLILAYMGEAAFLSKHHEDIQRSFYKAIPEPVFWPVFIVATLAAVVGSQAVISATFSIVSQSSALNCFPRVKIIHTSSKIYGQIYIPEVNWMLMFLSLAVTVGLRDTNMIGHAYGLAVTTVMFVTTCLMGLIIIIVWKRRIIDAISFVVIFGSVELLYISSSICK…
20	368	Dicotyledons	Myrtales	Eucalyptus	Eucalyptus grandis	2	EgHAK2	II:c	>Egrandis|Eucgr.B03355|Eucgr.B03355.1	MDSEAGAYRNPAKSLGVVYGDLSTSPLYVYRSTFAEDIQHSETNEEIFGVLSFVFWTLTLVPLLKYVFIVLRADDNGEGGTFALYSLLCRHARVNFLPSSQVADEDLSEYKKDGARLSPKTSFGSRLKSTLERHRVLQRLLLVLALIGTCMVIGDGILTPSISVFSAVSGLELSMAKEHHKYVEVPVACVVLIGLFALQHYGTHRVGFLFAPVVVLWLFCISAIGLYNIFHWNPHVYKALSPYYMYKFLRKTQRGGWMSLGGILLCITGSEAMFADLGHFSQLSIQIAFTSVVYPSLILAYMGQAAYLSKHHGQDHNYRIGFYVSVPEKLRWPVMGIAILAAVVGSQAIITGTFSIIKQCSSLGCFPRVKIVHTSSKIHGQIYIPEINWILMALCLAVT…
20	369	Dicotyledons	Myrtales	Eucalyptus	Eucalyptus grandis	3	EgHAK3	V	>Egrandis|Eucgr.B03948|Eucgr.B03948.1	MEEEDGIEEGSWSSGEGSRWVDGNEVDSETASWSWLGENEGREGQRYGSMRRRLVKKPKRADSFDVEAMEIAGAHGHHPKDPSVWQTLFLAFQTLGIVYGDMGTSPLYVFADVFSKVAIESDVDVLGALSLVMYTIALVPLAKYVFVVLKANDNGEGGTFALYSLICRYANVNMLPNRQPADERISSFKLKLPTPELERALNIKETLENRPSLKTLLLLLVLMGTSMIIGDGILTPAISVMSAVSGLQGELEGFGTSAVVIVSIVILVALFSIQQFGTSKVGFLFSPILALWFFSLGSIGLYNLVEYDITVLRAVNPAYIYFFFKKNSGVAWSALGGCVLCITGSEAMFADLGHFTVRSIQIAFTTVVFPCILLAYLGQAAYLMKNPDSAERIFYDSVP…
20	370	Dicotyledons	Myrtales	Eucalyptus	Eucalyptus grandis	4	EgHAK4	II:c	>Egrandis|Eucgr.B03949|Eucgr.B03949.1	MDLEPGSHQNDRPKKRESWRTVLTLAYQSLGVVYGDLSISPLYVYKSTFTDSIWHSETNEEIYGVLSFVFWTLTLVPLLKYVFIVLRADDNGEGGTFALYSLLCRHARVNSLPNCQVADEELSEYKRDGASLSPKSRFGRKLKSTLESHGALQKLLLVLALIGACMVIGDGVLTPAISVFSAVSGLELSMSEKHHKYLEVPVACVILIGLFALQHYGTHRVGFLFAPVMTMWLLCISAIGLYNIFSWNPHIYQALSPRYMYIFLKKTRSRGWTSLGGILLCITGSEAMFADLGHFSQLSIKIAFTFMVYPSLILAYMGQAAYLSQHHNIESKYKFGFYVSVPEKLRWPVLAIAISAAVVGSQAIITGTFSIIKQCSALGCFPRVKIVHTSSKIHGQIYI…
20	371	Dicotyledons	Myrtales	Eucalyptus	Eucalyptus grandis	5	EgHAK5	III	>Egrandis|Eucgr.D00035|Eucgr.D00035.1	MKSVSDMNSGTEIDEIDEESDNRGSMWVLDQKLDQPMDEEAGRLRNMYREKKFSALLLLRLSFQSLGVVYGDLGTSPLYVFYNTFPQGVKDPEDVMGALSLIIYSLTLIPLIKYVFIVCRANDNGQGGTFALYSLLCRHAKIKTIPNQHRTDEELTTYSRSAFHEQSFAAKTKNWLERRPSRKNALLILVLVATCMVIGDGILTPAISVLSAAGGIKVNHPDVSSKVVVVVAVVVLVVLFSMQHYGTDTVSWLFAPIVLLWFLLIGGIGIYNIWKYDAGVLRAFSPAYIYRYLKRGGKDRWTSLGGVMLCITGTEALYADLGHFPVLAIQIAFTVVVFPSLLLAYSGQAAYLMKHEDHVIDAFYKSIPDRIYWPVFIVATLAAIIASQATITATFSIIK…
20	372	Dicotyledons	Myrtales	Eucalyptus	Eucalyptus grandis	6	EgHAK6	II:a	>Egrandis|Eucgr.D01794|Eucgr.D01794.1	MAGSRLQGKEVIFLAYQSLGTAFAALSISPIYVYKVTFSGKLRDYQTEDVVFGVCSLIFWTLTLVTLLKYAIIMLTADDNGEGGTFALYSLLCRHGKFGLLPNYQTADEEISTYGNAKISLRSTPSSRFRGSIDRLKRRKTLLLLLVLFGASLGMTFGALAPAISVLSSIEGVQAQVTSLHKGSVIAIASVVLIGLFVLQHRGTYRAAFVFAPIMILWSLSIAALGIYNIIVWNPNVYKALSPYFIIEFFRHTGPDGWISLGGVLLCITGTEVMFEDLGYFSAASVRIAFFCVTYPCLVLQYLGQAAFLSKNFTAFPMSFYASIPDPLFWPFFAMAVLAAIVASETAISAACSFVNQSHALGCFPRVKILHTSRWIKGRIYVPELNWVLMILCLAVAIG…
20	373	Dicotyledons	Myrtales	Eucalyptus	Eucalyptus grandis	7	EgHAK7	III	>Egrandis|Eucgr.E04300|Eucgr.E04300.1	MDSRVEMDDEAENRGGMWDLEQKLDQPMDEEAGRLRNMYREKKFSTLLLLRLAFQSLGVVYGDLGTSPLYVFYNTFPKGIEDTEDVVGALSLIIYSLTLIPLLKYVFVVCRANDNGQGGTFALYSLLCRHAKIKTIPNQHRTDEELTTYSRTTFHEKSFAAKTKRWLERHASRKNMLLMLVLVGTCMVIGDGILTPAISVLSAAGGIKVDHPHMSNDVVVLVAVIILVGLFSMQHYGTDKVGWLFAPIVLLWFILIGAIGIVNIFKYDSSVLRAFSPVHIYRYFKRGGRERWTSLGGIMLCITGTEALFADLAHFPVLAVQIAFTVVVFPCLLLAYTGQAAYLMKNKEHVANAFYHSIPDSIYWPVFIIATLAAIVASQATISATFSIIKQALALGCFP…
20	374	Dicotyledons	Myrtales	Eucalyptus	Eucalyptus grandis	8	EgHAK8	III	>Egrandis|Eucgr.E04301|Eucgr.E04301.1	MVPREQTSDGADKKNSVWILHNAIDNPMDQEAEKLRNTQREKKISTLLLLRLAFQSLGVVFGDLGTSPLYVFYNTFPNGVKDPEDVIGALSVIIYSLTLIPLIKYIFIVSRANDSGQGGTFALYSLLCRHANINTIPNQDRTDEELTTYSRSIFDEHSFAAKTKRWLEGQRHRKSILLILVIVGSCMVIGDGILTPAISVLSATGGIKLDQPKMSDGITQVLGIEFFHTVDYLSITVYLFPSGLKLLTLCLFYTEVVVLVSVIILVGLFSIQHHGTDKIAWLFAPVVFLWFLLIGGIGIINICKYDTHVLKAFSPIYIYRYFKRGGIDGWTSLGGIMLSITGTEAVFADLSHFPVPAIQIAFTVVVFPSLLLAYSGQAAYLIKNSDHVVDLFYSSIPES…
20	375	Dicotyledons	Myrtales	Eucalyptus	Eucalyptus grandis	9	EgHAK9	I:a	>Egrandis|Eucgr.F02234|Eucgr.F02234.1	MAVATGAEEGPEISTEAREAEKLNMKERKVSWARLRRVDSLHLEAGRVSTSHAHSSEVNWQKTMSLAFQSIGVIYGDIGTSPLYVYSSTFTKGIKDTQDILGVLSLIIYTIILIPMLKYIFIVILANDNGDGGTFALYSLICRYINVSLIPNQQPEDREVSNYKLDIPSNQLRRSEKIKGILENSKSAKIMLFLVTIMATSMVIGDGVLTPCISILSVMSGINSLNTDAQVWISVAILIILFSVQRFGTDRIGFSFAPIILIWFTSLIGIGLFNLIKYDIGVLRAFNPKYIGDYFKRNGKEAWISLGGIFLCITGTEAMFADLGHFNVRAIQISSSFILFPTLVTVYSGQAAFLMKNPTSYANTFYDSVPGPLYWPMFGIALAAAIIASQAMISGAFAI…
20	376	Dicotyledons	Myrtales	Eucalyptus	Eucalyptus grandis	10	EgHAK10	II:a	>Egrandis|Eucgr.G01920|Eucgr.G01920.1	MEPESGVPNRRNPSQLCWVNLSRTLILAYQSLGVVYGDLSTSPLYVYTSTFVDKLETHRSEDAIFGAFSLIFWTLTLLPLLKYIFIVLNADDNGEGGTFALYSLLCRHAKFSLLPNQQAADEELSAYKYGPSASVAAPSPLKRFLEKHKKLRTALLLVVLFGACMVIGDGVLTPAISVLSAVSGLKVTENKLTDDELLLIACVILVGLFALQHFGTHRVAFMFAPIVIIWLISIFIIGVYNTIHWNPRIIQAISPYYIIKFFSETGKDGWISLGGILLSITGTEAMFADLGHFTALSIRLAFACVIYPCLVVQYMGQAAFLSKNLDSFQYSFYDSIPDRVFWPVFVIATLAAIVGSQAVITATFSIVKQCHALGCFPRVKVVHTSKHIYGQIYIPEINW…
20	377	Dicotyledons	Myrtales	Eucalyptus	Eucalyptus grandis	11	EgHAK11	I:a	>Egrandis|Eucgr.G01991|Eucgr.G01991.1	MGEEEEEEMEIAMEAREAENRTKPNTKERKVSWARLRRVDSLNLEAGRVSMSHGHSSEVNWQRTMSLAFQSIGVVYGDIGTSPLYVYESTFTEGIKDTQDVIGVLSLIIYTIALIPMLKYVFIVLLANDNGDGGTFALYSLICRYAKVSLIPNHQPEDREVSNYKLDTPSNQLQRAQKIKKKLENSKTAKIVLFLVTIMGTSMVIGDGVLTPSISVLSAVSGIKSLGKGAVVVISVVILIILFCVQRFGTDRVGFTFAPIIFIWFTFISGIGLFNLFKHDIGVLRAFNPKYIIDYFNRNGKQAWVSLGGIFLCITGTEAMFADLGHFNVRAIQISFSCLTFPALVTAYSGQAAYLMKYPDHVANTFYDSIPRPIYWPMFVVAVAAAIIASQAMISGAFA…
20	378	Dicotyledons	Myrtales	Eucalyptus	Eucalyptus grandis	12	EgHAK12	I:a	>Egrandis|Eucgr.G01992|Eucgr.G01992.1	MKMVLVILQMVLLKLLLILKQRILLLLRLIKQEENQQKWMAKIKVIKMMINDGEAVKEDKQGSWMRIRIIPMEIHKVGVYHLLQERKVSWARLRRVDSLNLEAGRVSKSHAHSSKVNWQRTLSLAFQSIGVVYGDIGTSPLYVFESSFTDKIKNTQDILGVLSLIIYTIALIPMLKYVFIVLLANDNGDGGTFALYSLICRYAKVSLIPNQQPEDREVSNYKLDPPSNQLRRSQKIKEMLENSRIAKIMLFLVTIMGTSMVIGDGILTPSISVLSAVSGIKSLGTGAVVGISVAILIMLFSIQRFGTDKVGFTFAPIIFVWFMFIGGIGLFNLFKYDIGVLRAFNPKYIVDYFNRNGKQAWVSLGGVLLCVTGTEAMFADLGHFNVPAIQISFSCLVCP…
20	379	Dicotyledons	Myrtales	Eucalyptus	Eucalyptus grandis	13	EgHAK13	I:a	>Egrandis|Eucgr.G02009|Eucgr.G02009.1	MAERKVVAMGEEEEEEMEIAMEAREAENRTKPNTKERKVSWARLRRVDSLNLEAGRVSMSHAHSSEMNWQRTMSLAFQSIGVVYGDIGTSPLYVYASTFTEGIKDTQDVIGVLSLIIYTIALLPMLKYVFIVLLANDNGDGGTFALYSLICRYAKVSLIPNHQPEDREVSNYKLDTPSNQLQRAQKIKKKLENSKTAKIVLFLVTIMGTSMVIGDGVLTPSISVLSAVSGIKSLGKVPVVVISVVILIILFCIQRFGTDRVGFTFAPIIFIWFTFISGIGLYNLFKHDIGVLRAFNPKYIVDYFNRNGKRAWVSLGGIFLCITGTEAMFADLGHFNVRAIQFDYWAFQLMQISFSCLTFPALLTAYSGQAAYLMKHPDHVANTFYDSIPRPIYWPMFVV…
20	380	Dicotyledons	Myrtales	Eucalyptus	Eucalyptus grandis	14	EgHAK14	I:a	>Egrandis|Eucgr.G02010|Eucgr.G02010.1	MGEEEGPEFSTEAREAEKLNMKERKVSWTRLRRVDSLHLEAGRVSMSHAHSSEVTWQRTMSLAFQSLGVIYGDIGTSPLYVYASTFTKGIKDAQDILGVLSLIIYTIVLIPMLKYIFIIILANDNGDGGTFALYSLICRYAKVSLIPNQQPEDREVSNYKLDIPSNQLRRSEKIKGMLENSKSAKITLFLVTIMATSMVIGDGVLTPSISVLSAVSGIKSLHTDAAVGISVAILIILFCVLRFGTDRIGFSFAPIVLIWFVLLSGIGLFNLFKYDIGVLRAFNPKYIGDYFKRNGKQAWISLGGIFLCITGTEAMFADLGHFNVQAIQISFSFLTFPTLVTAYSGQAAYLMKHPDHVDNTFYDSIPGPLYWPTFVVAVAAAIIASQAMISGAFAIISQS…
20	381	Dicotyledons	Myrtales	Eucalyptus	Eucalyptus grandis	15	EgHAK15	I:a	>Egrandis|Eucgr.G02011|Eucgr.G02011.1	MAERKVVALEEEEESEITMEAREGEKTKLNMKERKVSWARLRRVDSLNLEAGRVSKSHAHSSKVNWQRTLSLAFQSIGVVYGDIGTSPLYVFGSTFTDKIKNTQDILGVLSLIIYTIVLISMLKYVFIVLLANDNGDGGTFALYSLICRYAKVSLIPNQQPEDREVSNYKLDPPSNQLRRSQKIKEMLENSRIAKIILFLVTIMGTSMVIGDGILTPSISVLSAVSGIKSLGTGAVVGISVAILIMLFSIQRFGTDKVGFTFAPIILVWFMFIGGIGLFNLFKYDIGVLRAFNPKYIVDYFNRNGKQAWVSLGGVLLCITGTEAMFADLGHFNVPAIQIGFSCLVCPAILAAYCGQAAYLMKHPDHFADTFYNSVPGPLYWPTFVVAVAASIIASQAMI…
20	382	Dicotyledons	Myrtales	Eucalyptus	Eucalyptus grandis	16	EgHAK16	IV	>Egrandis|Eucgr.G02061|Eucgr.G02061.1	MPLKSPTEEDYLGIYSIMFWTLTLIGVVKYAGVALKADDQGEGGTFALYSLLCRKVNVGILHPKHVELNSGVSQHGLPEGTEKQSRLGKFFEQSIVARRVLLFIAMLGMCMLIGDGILTPAISVLSAMDGVRAPFPSVSKSLVEALSAIVLIVLFLLQKFGTSKVSFLFSPIMGAWTLTTPLVGIYSIIKHYPSIFKALSPHYIVHFFQRNGKEGWLLLGGTVLCITGSEAMFADLGHFNRASIQIAFLCSIYPSLVLTYAGQTAYLIRHPNDHDDGFYKFIPGSIYWPMFVVATLSAIVASQSLISATFSVIKQSVVLDYFPRVKVVHTSPNKEGEVYSPEINYILMILCVAVILIFGDGKDIGNAFGVVVSLVMLITTILLTLVMIMIWRTPMVLVV…
20	383	Dicotyledons	Myrtales	Eucalyptus	Eucalyptus grandis	17	EgHAK17	II:c	>Egrandis|Eucgr.G03126|Eucgr.G03126.1	MDLGYGRCWKSSEESWKTIMLLAYQSLGVVYGDLSISPLYVYASTFAEDIQHSDTNEEIYGVLSFVFWTLTLVPLFKYVFIVLQADDNGEGGTFALYSLICRHAKVSLLPNRQVADEELSTYKLEHPPENKNSSKLKTLLERHRRLHTALLILVLLGTCMVIGDGLLTPAISVFSAVSGLELSMSKEHHQYAVVPITCFILVCLFALQHYGTHRIGFLFAPVVLTWLLCISALGLYNILHWNPHVYKALSPYYMFKFLRKTRMGGWLSLGGVLLCITGSEAMFADLGHFSCTAIQIAFTFLVYPALILAYMGQAAYLSKHHDNRNPISFYLSVPKIVRWPVLIVAILASVVGSQAIISGTFSIINQSQSLGCFPRVKVVHTSDKIHGQVYIPEINWMLM…
20	384	Dicotyledons	Myrtales	Eucalyptus	Eucalyptus grandis	18	EgHAK18	II:c	>Egrandis|Eucgr.H00553|Eucgr.H00553.1	MQKETWKHVALLSFQTLGVVYGHLSTAPLYVFGTIPQEDFKSDEIPYQFLSFIFWTITIISLLKYALIVLIADDDGEGGTFALYSLLCRHAKVGLLPNDQLTDETVHLVETSSKMKWRSKARRALEKHRFSHYLMLFLALFGSCMIINDGVLTPAISVLSASKGVKRSLSEIVNSSSSLNTSRDSITKALDKYVPVPSACIIQIVLFMLQQYETDKIGFLFAPIITIWLLFIGGVGLYNILHFNPNILHAISPAYMYSFVRNINKHSWRSLGSILLCIAGSEAMFANLGHFSKTSIKITFVCCIYPVLLVSYAGQAAFISRNWHIVPEFNHLSSSMPDHTRHAFVVLSLFASAVGSQASITASFSIINQLLALKCFPQVKVVHTSEKIHGQVYIADLNW…
20	385	Dicotyledons	Myrtales	Eucalyptus	Eucalyptus grandis	19	EgHAK19	I:b	>Egrandis|Eucgr.H01186|Eucgr.H01186.1	MLGDAVEESREGESQQPEAASPSTSPELINGRKLSSHKLRRYDSLDVESAKCPSHHPHGSKQAVEWRVILTLAFQSIGIVYGDIGTSPLYVYPSTFTEGIKHNDDVLGVLSLIFYTITLIPLFKYVFIVLRANDNGDGGTFALYSLLCRYARIGLIPSQQPEDQDVSNFQLELPNNRLIRASRLKSKLEKSRFAKFFLLFATMLGTSMVIGDGILTPCMSVLSAVGGIKEATSAVTEDMIVWISVAILVCLFAAQRFGTDKVGYTFAPIICVWFAFIGAIGFYNFVKYDPGVVKAINPVYIIDYFRRNKKEGWISLGGIVLAITGTEALFADVGHFTVRSIQISMCAVTYPSLILAYAGQASFLRKHNDLVSASFFKSIPGPLYWPMFVIAVLAAIIAS…
20	386	Dicotyledons	Myrtales	Eucalyptus	Eucalyptus grandis	20	EgHAK20	I:b	>Egrandis|Eucgr.H01187|Eucgr.H01187.1	MSGDAVEEYREDESQQSKTASPSPSPSPLLVNGKQLSRHKLRRYDSLDVESAKYQGRQTHGSKQAVEWPVILNLAFQSIGIVYGDIGTSPLYVYSSTFTEGIKHNDDVLGVLSLIFYTITLIPLIKYVFIVLRATDNGDGGTFALYSLICRYARVGLIPSQQLEDQDVSNFQLELPSNRLLRASRLKSKLEKSQFAKFFLLFATMLGTSMVIGDGVLTPCISVLSAVGGIKQATSAVTEDMIVWISVVILVCLFSVQRFGTDKVGYSFAPIICVWFTFIGIVGLYNFLKYDPGVVKAINPIYIVEYFQRNKKEGWISLGGIVLAITGTEALFADVGHFTVRSIQISMCTVTYPSLILAYAGQASFLRKHHSLVSDAFYESIPGPLYWPMFVIAILAAII…
20	387	Dicotyledons	Myrtales	Eucalyptus	Eucalyptus grandis	21	EgHAK21	I:b	>Egrandis|Eucgr.H01188|Eucgr.H01188.1	MSGDVVEEFQENARQQAETASPSPSPILMNGKKLSSNKLRRYDSLDIESAKYLGHHRHGSKQAVEWPVILSLAFQSIGIVYGDIGTSPLYVYSSTFSQGIKHNDDVLGVLSLIFHTITLIPLIKYVFIVLRATDNGDGGTFALYSLLCRYARIGLIPSQQPENQDVSNFQLEPSSNRLLRASRLKSKLEKSQFAKFFLLFATMLGTSMVIGDGVLTPCISVLSAVGGIKRATSSVTEDMIVWISVAILVCLFTVQRFGTDKVGYSFAPIICVWFASVGTIGLYNFVKYDPGVIKAINPVYIVYYFRRNKKEGWISLGGIVLAITGTEALFADVGHFTVRSIQISMCTATYPSLILAYAGQATFLRKHNSLVNDAFYESIPGPLYWPMFVIAILAAIIAS…
20	388	Dicotyledons	Myrtales	Eucalyptus	Eucalyptus grandis	22	EgHAK22	I:b	>Egrandis|Eucgr.H03887|Eucgr.H03887.1	MERNDIAEEERPKVIKDDSTDGDDGRAEGDKGLRKIKKSDPFDVETAQFNSHQGHSSNQNLPWGVIIKLAIQSIGVVYGDIGTSPLYVMTGVFPNGIKNEEDILGALSLIFYSMILIYMIKYVFIVLSANDNGDGGTFALYSLICRYAKASLTPNEQAEDKEVSNYRLEVPSRRLRWASAVKSLLENRKAAKYLLLFVTMLGTAMVIGDGILTPCISVLSAIGGIREAASSFGNDQVMWISVVILILLFQVQRFGTQKVGYSFAPILSLWFLCIALIGIYNFAKHDPGVIRAVNPLYIIHYFMRNKKDAWISLGGVILCLTGSEALFADLGHFNILSIQLSSCLVVFPSIILAYFGQAAYLRKHTEDVASTFYSSIPKPMYWPMFVIAVLAAIIASQAM…
20	389	Dicotyledons	Myrtales	Eucalyptus	Eucalyptus grandis	23	EgHAK23	I:b	>Egrandis|Eucgr.H03888|Eucgr.H03888.1	MVFPSAEFGVGVIIKIAIQSIGVVYDDLGTSPLYVLPGIFSNGIKHEEDLLGALSLIFYSIILIFLIKYVFIVLSANDNGNGGTFVLYSLICRYAKVNLTPNQQAEDKEVSKYRLEVPSRRLHWASAMNERHTQLLAPLVYLSRKAAKYLLLFVTMLGTSMVIGDGILTPCISGILSAISGVREAASSLGDDQIMWISVVILILLFQAQRFGTHKVGYSFAPIISLWFLSIALIGIYNFAKHDPGVIRAVNPLYIVHYFMRNKKGCMDFSWRGSEALFADLGHFNILSIQLSSCIVVLPSIILAYFGQVAYLRKHTEDVASTFYSSIPKPVYRPMFVIAVLAAIIASQAMILATYAIVKQSVALGCFPRVKIVHTSKDHEGQIYIPEVNTLLMLACVGV…
20	390	Dicotyledons	Myrtales	Eucalyptus	Eucalyptus grandis	24	EgHAK24	I:b	>Egrandis|Eucgr.H03889|Eucgr.H03889.1	MQKLPWVMILKFAIQSIGVVYGDLGTSPLYVMPGIFPHGIKHEDDILGALSLIFYSIILIFLVKYVFIVLSANDDGDGGTFALYSLMCRNAKVSLTPNQQAEDKEVSNYRLEVPSRRFRRASTMKSFLENSEAAKYLLLYVTILGTAMVIGDGILTPCISVLSAVGGIQEAASSLGENQIMWISVVILILLFQVQRFGTHKVGYSFAPILSIWFLGIGLIGIYNIAKHDSGVIKAVNPLYIVHYFMRNKKEAWISLGGVILCLTGSEALFADLGHFNILSIQLSSCLVVLPSIILAYFGQAAYLRKHSENVANTFYSSLPKSVYWPMFVIAVLAAIIASQAMISATFAIVKQSVALGCFPNVKVVHTSQKHEGQIYVPEVNTLLMLACVGVTLGFKTTL…
20	391	Dicotyledons	Myrtales	Eucalyptus	Eucalyptus grandis	25	EgHAK25	I:b	>Egrandis|Eucgr.H03891|Eucgr.H03891.1	MTLKLAIQSIGVVYGDLGTSPLYVMSGIFPDGIKHEDDILGALSLIFYSIVLIGLIKYVFIVLSANDNGDGGTFALYSLICRYAKASLTPNQQAEDKEVSNYRLEVPSRRLRWASAMKSLLENSKAAKYLLLVVTMLGTAMVIGDGILTPCISVLSAVGGIKKAARSLGDDQIMWISVVILIFLFQVQRFGTHKVGYSFAPILSLWFLNIALIGIYNFVKYDSSVIKAVNPLYIVQYFMKNKKEAWISLGGVILCLTGSEALFADLGHFNILSIRLSSCLVVFPSIILTYFGQAAYLRKHAEDVASTFYSSIPKTVYWPTFVIAVMAAIIASQAMISATFAIVKQSLALGCFPTVKVVHTSRKHEGQIYIPEVNTLLMLACVGVTLGFKTTLKLGNAYG…
20	392	Dicotyledons	Myrtales	Eucalyptus	Eucalyptus grandis	26	EgHAK26	I:b	>Egrandis|Eucgr.H04099|Eucgr.H04099.1	MERDGMTEEERPKVVEVDSTDGYEGDKGSRRIKKFDSFDIETSRFKSDHGYSSKENLAWVMILKLAIQSIGVVYGDLGTSPLYVMSGIFPDGIKHEDDILGAVSLIFYSIILIGLIKYVFIVLSANDNGDGGTFALYSLMCRYAKASLTPNQQAEDKEVLNYRLEVPSRRFRRASAMKSFLENSEAAKYLLLFVTILGTAMVIGDGILTPCISVLSAVGGIQGAASSLGENQIMWISVVILILLFQVQRFGTHKVGYSFAPILSIWFLGIGLIGIYNIAKHDSGVIKAVNPLCIVHYFMRNKKEAWISLGGVILCLTGSEALFADLGHFNILSIQLSSCLVVLPSIILAYFGQAAYLRKHSENVASTFYSSLPKSVYWPMFVIAVLAATIASQAMISAT…
20	393	Dicotyledons	Myrtales	Eucalyptus	Eucalyptus grandis	27	EgHAK27	I:b	>Egrandis|Eucgr.H04105|Eucgr.H04105.1	MERDGITEEERPKVLEVDSTDGHEGDKGSRKIKKFDSFDIETSRFKSDHGYSSKENLAWVMILKLAIQSIGVVYGDLGTSPLYVMSGIFPDGIKHEDDILGVLSLIFYSIILIGLIKYVFIVLSANDNGDGGTFALYSLMCRYAKASLTPNQQAEDKEVSNYRLEVPSRHFRRASAMKLFLENSEAAKYLLLFVTILGTAMVIGDGILTPCISVLSAVGGIQGAASSLGENQIMWISVVILILLFQVQRFGTHKVGYSFAPILSIWFLGIGLIGIYNIAKHDSGVIKAVNPLYIVHYFMRNKKEAWISLGGVILCLTGSEALFADLGHFNILSIQLSSCLVVLPSIILAYFGQAAYLRKHSENVASTFYSSLPKSVYWPMFVIAVLAAIIASQAMISAT…
20	394	Dicotyledons	Myrtales	Eucalyptus	Eucalyptus grandis	28	EgHAK28	V	>Egrandis|Eucgr.I02664|Eucgr.I02664.1	MAEEGESERAEAVVAMGSMDSSESRWVFQDDDDSEIEGEEGDGDEDEDEEDEDGTPPRTALDSDDDGNAAHRLIRTGPRIDSFDVEALEVPGAPRNDYEGISVGRRIVIACQILGVVFGDVGTSPLYAFSVMFTKAPINGNEDVIGALSLVLYTLIIIPLVKYVLIVLWANDDGEGGTFALYSLICRHAKVSLLPNQLPSDARISSFRLKVPSAELERSLKIKERLENSLTLKRLLLILVLAGTSMVIADGVVTPAMSVSAVGGLKVGVAAIGEAEVMTISVAFLVVLFSVQKFGTSKVGLAVGPALFIWFCSLAGIGIYNIIKYDTSVFRAFNPIHIYFFFKRNTSKAWYALGGCLLCATGSEAMFADLCYFSVRSVQLTFVFLVLPCLMLGYMGQAA…
20	395	Dicotyledons	Myrtales	Eucalyptus	Eucalyptus grandis	29	EgHAK29	II:c	>Egrandis|Eucgr.J00128|Eucgr.J00128.1	MKSLLEKHKALHTALLILVLLGTCMVIGDGVLTPAISVFSAVSGLEFSMSKAHHEYAVIPITCVILLCLFALQHYGTHRIGFFFAPIVLIWLLCISALGLYNIFKWNPEVYKALSPYYMFSFLRKTRMGGWMSLGGILLCITGSEAMFADLGHFSYTAIQIAFTFLVYPALILAYMGQAAFLSKHHHNSNQISFYIAVPGSVRWPVLIVAILASVVGSQAIISGTFSIINQSQSLSCFPRVKVVHTSAKIHGQIYIPEINWILMILCIAVTIGFRDIKHMGNASGLAVMAVMLVTTCLTSLVIILCWHKPPIVALSFLLFFGSIELLYFSASLTKFTEGAWLPILLALFLMTIMLVWHYATVKKYEYDVHNKVSLEWLLALGPSLGIARVPGIGVVFTD…
20	396	Dicotyledons	Myrtales	Eucalyptus	Eucalyptus grandis	30	EgHAK30	II:c	>Egrandis|Eucgr.J02183|Eucgr.J02183.1	MDLEGVISSNNPIKRDSWKTVLTLAYQSLGVVYGDLSTSPLYVYKSTFAEDIKHSETNEEIYGVLSFVFWTLTLVPLVKYVFIVLRADDNGEGGTFALYSLLCRHARVNSLPNCQLADEELFEYKNDGSGEKNIGSTLKSTLEKHKVLQRVLLVLALIGTCMVIGDGVLTPAISVFSAVSGSELSMSREHHRYVEVPVACAILVFLFALQHYGTHRVGFLFAPVVITWLFCISAIGLYNIFHWNPHVYQALSPYYMYKFLKKTQRGGWMSLGGILLCITGSEAMFADLGHFSQLSIKIAFTFVVYPSLILAYMGQAAYLSQHHFEDSQYHIGFYVSVPEKLRWPVLVIAILAAVVGSQAIITGTFSIIKQCSALGCFPKVKIVHTSSKIHGQIYIPEIN…
21	397	Dicotyledons	Sapindales	Orange tree	Citrus sinensis	1	CisHAK1	II:c	>Csinensis|orange1.1g004007m.g|orange1.1g004007m	MDRETGVYQNLVKKESWRTVLTLAYQSLGVVYGDLSTSPLYVYKSTFAEDIKHSETNEEIFGALSFIFWTLTLVPLLKYVFIVLRADDNGEGGTFALYSLLCRHARVNSLPNGQLADEELSEYKKDVSSLGPKSSFGSKLKSTLESYRVLQRFLLVLTLIGTCMVIGDGVLTPALSVFSAVSGLELSTAKEHHKYVEVPVACIILIGLFALQHYGTHRVGFLFAPVVLIWLLCISAIGLYNIFHWNPHVYQALSPCYMYKFVKKTQKGGWMSLGGILLCITGSEAMFADLGHFSQLSIKIAFTSLVYPSLILAYMGQAAYLSQHHVLDNDYRIGFYVSVPEKLRWPVLVIAILAAVVGSQAIITGTFSIIKQCSALGCFPRVKIVHTSSKIHGQIYIPE…
21	398	Dicotyledons	Sapindales	Orange tree	Citrus sinensis	2	CisHAK2	V	>Csinensis|orange1.1g003207m.g|orange1.1g003603m	MEEEDKIEESSVRLLTSVGSGGGGESRWVDGSEVDSESPPWSLSEENGAREGFGSMRRRLVKKPKYDSLDVEAMEIAGAFGDHSKDVSVWHTLALAFQTLGVVYGDMGTSPLYVYSDVFSKVQIETEIDVLGALSLVMYTITLIPLAKYVFVVLKANDNGEGGTFALYSLISRYAKVNMLPNRQPADEQISSFRLKLPTPELERALQLKDILERTSSLKTLLLLLVLMGTSLIIGDGILTPAISVMSAVSGLQGEIHGFGEILALWFFSLGSIGLYNLVKYDISVVRAFNPIYIYLFFKKNGKDAWSALGGCVLCITGAEAMFADLGHFSVKAIQIAFTLVVFPCLLLAYMGQAAYLMKYPDSANRIFYDSVPDSLFWPVFVLAALAAMIASQAMISAT…
21	399	Dicotyledons	Sapindales	Orange tree	Citrus sinensis	3	CisHAK3	I:b	>Csinensis|orange1.1g004397m.g|orange1.1g004397m	MSGSGGVESGERQVALSQDNLKGNKLLPQRYDSLDLESGAVSGYHRRSSKAMKWSVILQLAFQSIGIVYGDIGTSPLYVFSSTFPNGINHADDVLGVLSLILYTLTLIPLIKYVFIVLHANDNGDGGTFALYSLICRYANVGLVPSQQAEDSNVSNFQLELPGNKRSRMASSLKSKLENSRVAKFFLFFATLLGTSMLIGDGVLTPCISVLSAVGGIKEATSAMTEDRVVWISAAILVCLFLFQRLGTDKVGYTFAPILLVWFAFIAGIGIYNIIHYDPTVIKALNPRYIVDYFRNNQQAAWISLGGIILCTTGAEALFADVGHFTVLSIRISTCGVVYPALILAYTGQASFLRKHPDLVSNTFFKSVPGPVYWPMFVVAVLAAIIASQALISGTFSII…
21	400	Dicotyledons	Sapindales	Orange tree	Citrus sinensis	4	CisHAK4	II:b	>Csinensis|orange1.1g041332m.g|orange1.1g041332m	MKPSEEFLEQGISQQNFKRVSCTTVVSLAYQSLGVVYGDLSTSPLYVYKTAFSGKLSLHENDEEIYGVLSFIFWTFTLIALLKYVFVVMSADDNGEGGTVALYSLLCRHARLSTLPNQQATDEKLSSYATDGSADTWQSSGLKALFEKHQRFSNMLLIFVLLGTSMAIGDGVLTPTISVLSAVSGVQVKIRELHENYVVLISCVILVGLFSLQHHGTHRVAFIFAPIVTTWLLCISSIGIYNIFQWNPHIFNALSPVYMLKFFRSTGIDGWISLGGVVLSITGVETMFADLGHFSSLSIKVAFTFLVYPCLILAYMGEAAFLTKHHEDIQRSFYKAIPEAVFWPVFIVATFAAIVGSQAVISATFSIISQCCALNCFPSVKIIHTSSKIYGQIYIPEVN…
21	401	Dicotyledons	Sapindales	Orange tree	Citrus sinensis	5	CisHAK5	V	>Csinensis|orange1.1g003089m.g|orange1.1g003089m	MAEETSGGLEATNGVGLSSMDSTESRWVFQNDDESEIDEDEDEVEDGDSGHRTGGDSEDEDNGEQRLIRTGPRIDSFDVEALEVPGALRNDYEEFSVGRKIILAFQTLGVVFGDVGTSPLYTFDVMFSKAPINDNEDILGALSLVLYTLILIPLVKYVFVVLWANDDGEGGTFALYSLICRHAKVSLLPNQLPSDARISSFRLKVPSPELERSLKIKERLETSLTLKRLLLMLVLAGTSMVIADGVVTPAMSVMSAVGGLKVGVGAINQDQVVMISVAFLVILFSVQKFGTSKVGMAVGPAYLYGFALLLALEFTTLSNMTAVSGGHLIPFTYTTSSRGTQLRPGMPLGAVFFVQQVLRQCLQIFVIFQCGRFSGCLQLTFVFLVLPCLLLGYLGQAAY…
21	402	Dicotyledons	Sapindales	Orange tree	Citrus sinensis	6	CisHAK6	II:a	>Csinensis|orange1.1g004065m.g|orange1.1g004065m	MQVETKSPRQEFLLLAYQSFGIVFSDLSISPLYVYKSTFSGSLRHYQNEDAVFGAFSVIFWTLTLLSLFKYVIIVLNADDNGEGGTFSLYALLCRHAKVGLLPNHQAADEELTTYHDPGYSSRNMTSSPFKVFMERHKKTKTGLLLLVLLGAALVFSIGVLTPAISVLSSIDGLQVQLQNRHTRMVVFLACLVLIGHFVLQYRGTHRVAFMFAPVVILWLLSTTGIGIYNVIKWNPRVYQALSPYYIYKFFKYTGRDGWTSLAGLFLCTTGSEAMFADLGQFTAGSIKLAFCCIVFPCLVLQYMGQAAFLSKNFSAAPLSFHASIPDPLRWPVLVVATLAAIVASQSVISATFSTVKQCYALGCFPRVKVVHKARWVRGQVYIPEINWVLMILSLAVTV…
21	403	Dicotyledons	Sapindales	Orange tree	Citrus sinensis	7	CisHAK7	II:c	>Csinensis|orange1.1g003815m.g|orange1.1g003811m	MDLEHGKCWDSSKKDSWKTILILAYQSLGVVYGDLGISPLYVYKSTFAEDIQHSNTNEEIFGALSFVFWTLTLVPLFKYVFIVLRADDNGEGGTFALYSSICRHAKVSLLPNRQAADEALSTYKLEQPPEKNSSRVKMYLEKHKFLHTALLILVLLGTCMVIGDGLLTPAISVFSAVSGLEFFMSKEHHQYAVIPITCFIIVCLFALQHYGTHRVGFLFAPVVLIWLLCISALGLYNIIHWNSHVYQALSPYYMFKFLKKTRKRGWMSLGGILLCITGSEAMFADLGHFSYAAIQIAFTFLVYPALILAYMGQAAYLSKHHETNYQISFFVSVPESVRWPVLVVAILASIVGSQAIISGTFSIINQSQSLGCFPRVKVVHTSDKIHGQIYIPEINWVLM…
21	404	Dicotyledons	Sapindales	Orange tree	Citrus sinensis	8	CisHAK8	II:c	>Csinensis|orange1.1g040260m.g|orange1.1g040260m	MDLERVIGNSPVKKDSWKTVLTLAYQSLGVVYGDLSTSPLYVYKSTFAEDIQHSETNEEIYGVLSFVFWTLTLIPLLKYVFIVLRADDNGEGGTFALYSLLCRHARISTLPNCQLADEELSAYNKDVILSDNKSSIGSSLKYTLEKHRVLQKMLLILALIGTCMVIGDGVLTPALSGSGVFSAVSGLELSMSKEHHQYVEVPVACAILVFLFSLQHYGTHRVGFLFAPIVITWLLCISAIGLYNIFHWNPHVFKALSPYYMYKFLKKTQKGGWMSLGGILLCITGSEAMYADLGHFSQLSIKIAFTCLVYPSLILAYMGQAAYLSKHHNIESDYRIGFYVSVPEKLRWPVLAIAILAAVVGSQAIITGTFSIIKQCSALGCFPRVKIIHTSSKIHGQIY…
21	405	Dicotyledons	Sapindales	Orange tree	Citrus sinensis	9	CisHAK9	II:a	>Csinensis|orange1.1g005583m.g|orange1.1g005583m	MSGGTFALYSLLCRHAKFSLLPNQQAADEELSTYKYGNAVHAVGSSPFKRFLEKHKKLRTVLLVVVLFGACMVIGDGVLTPAISVLSSVSGLQVTENKLTDGELLILACVILVGLFALQHFGTHKVAVMFAPIIIVWLISIFAVGLYNVIHWNPKVISAISPLYIIKYFRETGKTGWISLGGLLLCITGTEAMFADLGHFTALSIRLAFTFFVYPCLVVQYMGQAAYLSKNLDKIPNSFYDSIPEPVFWPVFVVATLSAIVGSQAIITATFSIVKQCHSLGCFPRVKVVHTSRHIYGQIYIPEINWILMILTLAITIGFQDTTLIGNAYGLACMTVMFITTFLMALIIIFVWYKSIFLAGAFLLFFLAIEGVYLSAAFIKVPQGGWVPLVLSSVFMVVM…
21	406	Dicotyledons	Sapindales	Orange tree	Citrus sinensis	10	CisHAK10	IV	>Csinensis|orange1.1g006371m.g|orange1.1g006371m	MPLKSPTEDDYLGIYSIMFWTLTLIGVVKYASIALKADDQGEGGTFALYSLLSRKMDIGFFSAKNLDSNSIFHEGAENKSRLGKFFEKSILARRILLFIAMLGMCMLIGDGILTPAISVLSAMDGIRAPFPSVSKSLVEALSAIILIVLFLMQKFGTSRVSFLFSPIMGAWTFSTPLVGIYSIIHHYPGIFKALSPHYTFHFFWRKGKEGWLLLGGTVLCITGSEALFADLGHFNRSSIQMAFLFTIYPSLVLTYAGQTAYLIRHPNDHEDGFYKFIPKSVYWPIFIIATLAAIVASQSLISATFSVIKQSVVLDYFPRVKVVHTSSNKEGEVYSPEVNYILMILCVAVILIFGEGKDIGNAFGVVVSLVMLITTILLTLVMIVIWRTPSLLVALYFLV…
21	407	Dicotyledons	Sapindales	Orange tree	Citrus sinensis	11	CisHAK11	I:a	>Csinensis|orange1.1g003689m.g|orange1.1g003689m	MAEKDMPTNIEADGIETVETDKNLKEKKVSWAKLRRVDSLNLEAGRISGAHGGHHGSKGDWRTTFILAFQSIGVVYGDIGTSPLYVYASTFTEGIHNTDDILGVLSLIIYTIVLVPLLKYVFIVLLANDNGDGGTFALYSLICRYAKVALIPNDQPEDRELSNYKLDTPSTNLRRAYRIKEKLETSKTAKIVLFLITILGTSMVIGDGVLTPCISVLSAVSGINSLGQNAIVGISVAILIVLFAVQRLGTDKVGSTFAPVIFLWFSFISGIGLYNLIKHDIGVLRAFNPKYIVDYFRRNGKQGWISLGGIVLCITGTEAMFADLGHFSVRAIQISFSGIVFPALLAAYSGQAAYLRKFPNHVDDTFYKATPHALYWPQFVVAVAAAIIASQAMISGAFS…
21	408	Dicotyledons	Sapindales	Orange tree	Citrus sinensis	12	CisHAK12	I:b	>Csinensis|orange1.1g004023m.g|orange1.1g004023m	MSGDVVIEPTKEEEEAVSVQLQGKKLSWQKLGRNDSLDMESRTVSGHYGRDSKAVKWSVILQLAFQSIGVVYGDIGTSPLYVYASTFTNGINHIDDILGVLSLIFYTLTLIPLVKYVLIVLRANDNGDGGTFALYSLICRYAKVGLIPSEQAEDCDVSNFQLELPSKRLKRASRLKYKLENSQFAKYFLLVATMLGTSMVIGDGVLTPCISVLSAVGGIKEASAGMTQDKVVWVSVAIIVLLFMVQRFGTDKVGYSFAPIICVWFSLIGGIGIYNFIKYDPSVIKAINPKYIVDYFTRNKKDAWISLGGVVLAITGTEALFADVGHFTVQSIQLSMCTVTYPALILAYMGQASFLRKHSELVSETFYKSIPHSLYWPMFIVAVMAAIIASQAMISGTFS…
21	409	Dicotyledons	Sapindales	Orange tree	Citrus sinensis	13	CisHAK13	I:b	>Csinensis|orange1.1g042124m.g|orange1.1g042124m	MLCKYGIVDAESRTVSSHHGHGAKAVKWSVILQLAFQSLGVVYGDIGTSPLCVYASTFTNDIRHVDDILGVFSLIIYTLSLIPLIKYVFIVLQANDNGDEAADCNLELPRSRGSRGTAMALRVKHKLENSQFAKPFLLITAMLGTCILIGDGVVTPCVSVISAVRGIREATSAMTEERIVWISVAILGCLFMIQQFGTDKIGYIFAPIICVWFALIGGIGIYNFFKFDPTVIKAINPIYIIEYFRRNKKEAWISLGGVVLAITGSEALFGDVGHFTVRSIQISMCTVTYPTLVLAYVGQAPPSFARTKIFVKIVHTSAKFKVQIYIPEVNYLLMLACMGVTLGFKDPKKIGNAYALLVLIMIIIWKSSMFFIRTYVLTIGSVESVYSSSVLYKFNQGGY…
21	410	Dicotyledons	Sapindales	Orange tree	Citrus sinensis	14	CisHAK14	II:b	>Csinensis|orange1.1g004722m.g|orange1.1g004722m	MKWYKTTLCLAYQSFGVVYGDLSISPIYVYKSTFSGKLRSHEEDDEILGVFSLVFWTLTVIPLFKYIIFVLGADDNGEGGTFALYSILCRRAKVGLLSASHAPDGDISACSSQLPLKETRGSVLLKEFFDKHHNSRILLLLVVLLGTSMVIGDGILTPAMSVLSAINGIKVKATGLDENYTVLIASLMLVGLFALQHFGTHRVGFLFAPVLLAWLLCISIVGFYNTVRWNPGVVRALSPYYVYIFFKKAGKDGWSSLGGVVLCVTGAEAMFADLGHFSHLPIRIAFATVVYPCLILAYMGEAAFYTKHKEDLERSFFKAIPEAVFWPVFIIATLATAVASQAIISATFSIISQCRALSCFPRVKIMHTSNQIHGQIYIPEMNWILMIFCLGVVVGFRDT…
21	411	Dicotyledons	Sapindales	Orange tree	Citrus sinensis	15	CisHAK15	III	>Csinensis|orange1.1g003514m.g|orange1.1g003514m	MAARVEIDEDNETNKGSMWVLDQKLDQPMDEEAGRLRNMYREKKFSSLLLLRFAFQSLGVVYGDLGTSPLYVFYNTFPHGIDDPEDIIGALSLIIYSLTLIPLLKYVFIVCRANDSGQGGTFALYSLLCRHAKVITIPNQHRTDEELTTYSRSTFHEKSFAAKTKRWLEHQTFRKNALLMLVLVGTCMVIGDGILTPAISVLSASGGIKVDHPHMSNGVVVLVAVVILVGLFSLQHYGTDRVGWLFAPIVLLWFLLIGGIGMLNIWKYDSSVLKAFSPVYIYRYFRRGGRDGWTSLGGIMLSITGTEALFADLAHFPVSAIQIAFTVVVFPCLLLAYSGQAAYLMNHQDHVVDAFYRSIPAQLVEGLGSGAWPYRGLRSDPSDSIYWPVFIVATAAAIV…
21	412	Dicotyledons	Sapindales	Orange tree	Citrus sinensis	16	CisHAK16	III	>Csinensis|orange1.1g040213m.g|orange1.1g040213m	MGSEVKSDEDTDNKGQVWFVNHKFDHLVDEEAERHSDANVKNRLSALLLMRFAFKSLGVVYGDLGTSPMYVLYNTFPDGIKDTEDVIDALSLIIYTLTIIPLIKYVLIVCRANDNGQGGTFALYSLLCRHAKLRTIPNQDRSDEELTTYSRSTFHERSHAAKTKRWLEKHSCSKIVLLVLVLVGSSMVIGDGILTPAISEAVVLVAVAILVVLFSVQHFGVDKVGWLFAPIVFVWFLLIGGIGIINIWKYDSSVLKAFSPVHVYWFFRKGHTWPSLGSIILCITGTEALFADVCQFPVLSIQIAFATVVYPCLLLAYIGQAAYLMKKPDHVHDVFYRSIPDIIYWPVFVVATAAAVVASQATISATFSLIKQAVALGCFPRVKVMHTSKKYSSHIYIPE…
22	413	Dicotyledons	Sapindales	Clementine	Citrus clementina	1	CicHAK1	III	>Ciclev10014328m.g peptide: Ciclev10014328m (PAC:20818414)	MAARVEIDEDNETNKGSMWVLDQKLDQPMDEEAGRLRNMYREKKFSSLLLLRFAFQSLGVVYGDLGTSPLYVFYNTFPHGIDDPEDIIGALSLIIYSLTLIPLLKYVFIVCRANDSGQGGTFALYSLLCRHAKVITIPNQHRTDEELTTYSRSTFHEKSFAAKTKRWLEHQTFRKNALLMLVLVGTCMVIGDGILTPAISVLSASGGIKVDHPHMSNGVVVLVAVVILVGLFSMQHYGTDRVGWLFAPIVLLWFLLIGGIGMLNIWKYDSSVLKAFSPVYIYRYFRRGGRDGWTSLGGIMLSITGTEALFADLAHFPVSAIQIAFTVVVFPCLLLAYSGQAAYLMNHQDHVVDAFYRSIPDSIYWPVFIVATAAAIVASQATISATFSIIKQALALGCF…
22	414	Dicotyledons	Sapindales	Clementine	Citrus clementina	2	CicHAK2	II:a	>Ciclev10014338m.g peptide: Ciclev10014338m (PAC:20817901)	MEPESGLSPPRNPSQLSWPNLSRNLLLAYQSLGVVYGDLSTSPLYVYSSAFSGRLDEKESEETILGAFSLIFWTLTLIPLLKYIFIVLSADDNGEGGTFALYSLLCRHAKFSLLPNQQAADEELSTYKYGNAVHAVGSSPFKRFLEKHKKLRTVLLVVVLFGACMVIGDGVLTPAISVLSSVSGLQVTENKLTDGELLILACVILVGLFALQHFGTHKVAVMFAPIIIVWLISIFAVGLYNVIHWNPKVISAISPLYIIKYFRETGKTGWISLGGLLLCITGTEAMFADLGHFTALSIRLAFTFFVYPCLVVQYMGQAAYLSKNLDKIPNSFYDSIPEPVFWPVFVVATLSAIVGSQAIITATFSIVKQCHSLGCFPRVKVVHTSRHIYGQIYIPEINW…
22	415	Dicotyledons	Sapindales	Clementine	Citrus clementina	3	CicHAK3	III	>Ciclev10014365m.g peptide: Ciclev10014365m (PAC:20817583)	MGSEVKSDEDTDNKGQVWFVNHKFDHLVDEEAERHSDANIKNRLSALLLMRFAFKSLGVVYGDLGTSPMYVLYNTFPDGIKDTEDVIDALSLIIYTLTIIPLIKYVLIVCRANDNGQGGTFALYSLLCRHVKLRTIPNQDRSDEELTTYSRSTFHERSHAAKTKRWLEKHSSSKIVLLVLVLVGSSMVIGDGILTPAISEAVVLVAVAILVVLFSVQHFGVDKVGWLFAPIVFVWFLLIGGIGIINIWKYDSSVLKAFSPVHVYWFFRKGHTWPSLGGIILCITGTEALFADVCQFPVLSIQIAFATVVYPCLLLAYTGQAAYLMKNPDHVHDVFYRSIPDIIYWPVFVVATAAAVVASQATISATFSLIKQADALGCFPRVKVMHTSKKYSSHIYIPE…
22	416	Dicotyledons	Sapindales	Clementine	Citrus clementina	4	CicHAK4	II:b	>Ciclev10014387m.g peptide: Ciclev10014387m (PAC:20816911)	MDSESGTPTRDSQLKWYKTTLCLAYQSFGVVYGDLSISPVYVYKSTFSGKLRSHEDDDEILGVFSLVFWTLTVIPLFKYIIFVLGADDNGEGGTFALYSILCRRAKVGLLSASHAPDDDISACSSQLPLKETRGSVLLKEFFDKHHNSRILLLLVVLLGTSMVIGDGILTPAMSVLSAVNGIKVKATGLDENYTVLIASLMLVGLFALQHFGTHRVGFLFAPVLLAWLLCISIVGFYNTVHWNPGVVRALSPYYVYIFFKKAGKDGWSSLGGVVLCVTGAEAMFADLGHFSHLPIRIAFATVVYPCLILAYMGEAAFYTKHKEDLERSFFKAIPEAVYWPVFIIATLATAVASQAIISATFSIISQCRALSCFPRVKIIHTSNQIHGQIYIPEMNWILM…
22	417	Dicotyledons	Sapindales	Clementine	Citrus clementina	5	CicHAK5	IV	>Ciclev10014399m.g peptide: Ciclev10014399m (PAC:20817401)	MDRQLGAADSVAASTFSEVVVDVQPSFNADVHSRLRHSRNSINSSASAADNKKGRWENLVLAYKTLGVVFGGLVTSPLYVYPSMPLKSPTEDDYLGIYSIMFWTLTLIGVVKYASIALKADDQGEGGTFALYSLLSRKMDIGFFSAKNLDSNSIFHEGAENKSRLGKFFEKSILARRILLFIAMLGMCMLIGDGILTPAISVLSAMDGIRAPFPSVSKSLVEALSAIVLIVLFLLQKFGNFPSEFSFSPPSWVHGHSVLLCWNYSIIHHYPGIFKALSPHYTFHFFWRKGKEGWLLLGGTVLCITGSEALFADLGHFNRSSIQMAFLFTIYPSLVLTYAGQTAYLIRHPNDHEDGFYKFIPKSVYWPIFIIATLAAIVASQSLISATFSVIKQSVVLDY…
22	418	Dicotyledons	Sapindales	Clementine	Citrus clementina	6	CicHAK6	II:c	>Ciclev10014611m.g peptide: Ciclev10014611m (PAC:20817628)	MLLILALIGTCMVIGDGVLTPALSVFSAVSGLELSMSKEHHQYVEVPVACAILVFLFSLQHYGTHRVGFLFAPIVITWLLCISAIGVYNIFHWNPHVFKALSPYYMYKFLKKTQKGGWMSLGGILLCITGSEAMYADLGHFSQLSIKIAFTCLVYPSLILAYMGQAAYLSKHHNIESDYRIGFYVSVPEKLRWPVLAIAILAAVVGSQAIITGTFSIIKQCSALGCFPRVKIIHTSSKIHGQIYIPEINWTLMLLCLAITIGFRDTKHMGNASGLAVITVMLVTTCLMSLVIVLCWHQSIFFAICFIIFFGSVEALYFSASLIKFLEGAWVPIALSFIFLVAMYVWHYGTLKKYEFDVQNKVSINWILSLGPNLGIVRVRGIGLIHTELVSGIPAIFSH…
22	419	Dicotyledons	Sapindales	Clementine	Citrus clementina	7	CicHAK7	I:b	>Ciclev10018938m.g peptide: Ciclev10018938m (PAC:20808836)	MSGDVVIEPTKEEEEAVSVQLQGKKLSWQKLGRNDSLDMESRTVSGHYGRDSKAVKWSVILQLAFQSIGVVYGDIGTSPLYVYASTFTNGINHIDDILGVLSLIFYTLTLIPLVKYVLIVLRANDNGDGGTFALYSLICRYAKVGLIPSEQAEDCDVSNFQLELPSKRLKRASRLKYKLENSQFAKYFLLVATMLGTSMVIGDGVLTPCISVLSAVGGIKEASAGMTQDKVVWVSVAIIVLLFMVQRFGTDKVGYSFAPIICVWFSLIGGIGIYNFIKYDPSVIKAINPKYIVDYFTRNKKDAWISLGGVVLAITGTEALFADVGHFTVQSIQLSMCTVTYPALILAYMGQASFLRKHSELVSETFYKSIPHSLYWPMFIVAVMAAIIASQAMISGTFS…
22	420	Dicotyledons	Sapindales	Clementine	Citrus clementina	8	CicHAK8	II:a	>Ciclev10018953m.g peptide: Ciclev10018953m (PAC:20807635)	MVETKSPRQEFLLLAYQSFGIVFSDLSISPLYVYKSTFSGSLRHYQNEDAVFGAFSVIFWTLTLLSLFKYVIIVLNADDNGEGGTFSLYALLCRHAKVGLLPNHQAADEELTTYHDPGYSSRNMTSSPFKVFMERHKKTKTGLLLLVLLGAALVFSIGVLTPAISVLSSIDGLQVQLQNRHTRMVVFLACLVLIGHFVLQYRGTHRVAFMFAPVVILWLLSTTGIGIYNVIKWNPRVYQALSPYYIYKFFKYTGRDGWTSLAGLFLCTTGSEAMFADLGQFTAGSIKLAFCCIVFPCLVLQYMGQAAFLSKNFSAAPLSFHASIPDPLRWPVLVVATLAAIVASQSVISATFSTVKQCYALGCFPRVKVVHKARWVRGQVYIPEINWVLMILSLAVTVG…
22	421	Dicotyledons	Sapindales	Clementine	Citrus clementina	9	CicHAK9	I:b	>Ciclev10023362m.g peptide: Ciclev10023362m (PAC:20811304)	MLCKYGIVDAESRTVSSHHGHGAKAVKWSVILQLAFQSLGVVYGDIGTSPLCVYASTFTNDIRHVDDILGVFSLIIYTLSLIPLIKYVFIVLQANDNGDEAADCNLELPRSRGSRGTAMALRVKHKLENSQFAKPFLLITAMLGTCILIGDGVVTPCVSVISAVRGIREATSAMTEERIVWISVAILGCLFMIQQFGTDKIGYIFAPIICVWFALIGGIGIYNFFKFDPTVIKAINPIYIIEYFRRNKKEAWISLGGVVLAITGSEALFGDVGHFTVRSIQISMCTVTYPTLVLAYVGQAPPSFARTKILLAMSSSSPFQVKHRINVKIVHTSAKFKVQIYIPEVNYLLMLACMGVTLGFKDPKKIGNAYALLVLIMIIIWKSSMFFIRTYVLTIGSVE…
22	422	Dicotyledons	Sapindales	Clementine	Citrus clementina	10	CicHAK10	V	>Ciclev10024889m.g peptide: Ciclev10024889m (PAC:20800424)	MAEETSGGLEATNGVGLSSMDSTESRWVFQNDDESEIDEDEDEVEDGDSGHRTGGDSEDEDNGEQRLIRTGPRIDSFDVEALEVPGALRNDYEEFSVGRKIILAFQTLGVVFGDVGTSPLYTFDVMFSKAPINDNEDILGALSLVLYTLILIPLVKYVFVVLWANDDGEGGTFALYSLICRHAKVSLLPNQLPSDARISSFRLKVPSPELERSLKIKERLETSLTLKRLLLMLVLAGTSMVIADGVVTPAMSVMSAVGGLKVGVGAINQDQVVMISVAFLVILFSVQKFGTSKVGMAVGPALFVWFCSLAGIGIYNLVKYDSSVWRAFNPVHIYYFFKRNSTKAWYALGGCILCATGSEAMFADLCYFSVRSVQLTFVFLVLPCLLLGYLGQAAYLMDN…
22	423	Dicotyledons	Sapindales	Clementine	Citrus clementina	11	CicHAK11	I:a	>Ciclev10027299m.g peptide: Ciclev10027299m (PAC:20800829)	SLPSAKDGRSAFLPIKTKQLSRKYKTIFETSQAGVKMAEKDMPTNIEADGIETVETDKNLKEKKVSWAKLRRVDSLNLEAGRISGAHGGHHGSKSIGVVYGDIGTSPLYVYASTFTEGIHNTDDILGVLSLIIYTIVLVPLLKYVFIVLLANDNGDGGTFALYSLICRYAKVALIPNDQPEDRELSNYKLDTPSTNLRRAYRIKEKLETSKTAKIVLFLVTILGTSMVIGDGVLTPCISVLSAVSGINSLGQNAIVGISVAILIVLFSVQRLGTDKVGSTFAPVIFLWFSFISGIGLYNLFKHDIAVLRAFNPKYIVDYFRRNGTEAMFADLGHFSVRAIQISFSGIVFPALLAAYSGQAAYLRKFPNHVDDTFYKATPDALYWPQFVVAVAAAIIASQ…
22	424	Dicotyledons	Sapindales	Clementine	Citrus clementina	12	CicHAK12	I:b	>Ciclev10027874m.g peptide: Ciclev10027874m (PAC:20812519)	MKPSEEFLEQGISQQNFKRVSCTTVVSLAYQSLGVVYGDLSTSPLYVYKTAFSGKLSLHENDEEIYGVLSFIFWTFTLIALLKYVFVVMSADDNGEGGTFALYSLLCRHARLSTLPNQQATDEKLSSYATDGSADTWQSSGLKALFEKQQRFRNMLLIFVLLGTSMAIGDGVLTPTISVLSAVSGVQVKIRELHENYVVLISCVILVGLFSLQHHGTHRVAFIFAPIVTTWLLCISSIGIYNIFQWNPHIFNALSPVYMLKFFRSTGIDGWISLGGVVLSITGVETMFADLGHFSSLSIKVAFTFLVYPCLILAYMGEAAFLTKHHEDIQRSFYKAIPEAVFWPVFIVATFAAIVGSQAVISATFSIISQCCALNCFPSVKIIHTSSKIYGQIYIPEVN…
22	425	Dicotyledons	Sapindales	Clementine	Citrus clementina	13	CicHAK13	V	>Ciclev10030704m.g peptide: Ciclev10030704m (PAC:20804799)	MEEEDKIEESSVRLLTSVGSGGGGESRWVDGSEVDSESPPWSLSEENGAREGYGSMRRRLVKKPKYDSLDVEAMEIAGAFGDHSKDVSVWHTLALAFQTLGVVYGDMGTSPLYVYSDVFSKVQIETEIDVLGALSLVMYTITLIPLAKYVFVVLKANDNGEGGTFALYSLISRYAKVNMLPNRQPADEQISSFRLKLPTPELERALQLKDILERTSSLKTLLLLLVLMGTSLIIGDGILTPAISVMSAVSGLQGEIRGFGESALVIVSIIILVALFSIQRFGTGKVGFMFAPVLALWFFSLGSIGLYNLVKYDISVVRAFNPIYIYLFFKKNGKDAWSALGGCVLCITGAEAMFADLGHFSVKAIQIAFTLVVFPCLLLAYMGQAAYLMKYPDSANRIF…
22	426	Dicotyledons	Sapindales	Clementine	Citrus clementina	14	CicHAK14	II:c	>Ciclev10030744m.g peptide: Ciclev10030744m (PAC:20803707)	MDLEHGKCWDSSKKDSWKTILILAYQSLGVVYGDLGISPLYVYKSTFAEDIQHSNTNEEIFGALSFVFWTLTLVPLFKYVFIVLRADDNGEGGTFALYSSICRHAKVSLLPNRQAADEALSTYKLEQPPEKNSSRVKMYLEKHKFLHTALLILVLLGTCMVIGDGLLTPAISVFSAVSGLEFFMSKEHHQYAVIPITCFIIVCLFALQHYGTHRVGFLFAPVVLIWLLCISALGLYNIIHWNSHVYQALSPYYMFKFLKKTRKRGWMSLGGILLCITGSEAMFADLGHFSYAAIQIAFTFLVYPALILAYMGQAAYLSKHHETNYQISFFVSVPESVRWPVLVVAILASIVGSQAIISGTFSIINQSQSLGCFPRVKVVHTSDKIHGQIYIPEINWVLM…
22	427	Dicotyledons	Sapindales	Clementine	Citrus clementina	15	CicHAK15	II:c	>Ciclev10030755m.g peptide: Ciclev10030755m (PAC:20803998)	MDRETGVYQNLVKKESWRTVLTLAYQSLGVVYGDLSTSPLYVYKSTFAEDIKHSETNEEIFGALSFIFWTLTLVPLLKYVFIVLRADDNGEGGTFALYSLLCRHARVNSLPNGQLADEELSEYKKDVSSLGPKSSFGSKLKSTLESYRVLQRFLLVLTLIGTCMVIGDGVLTPALSVFSAVSGLELSTAKEHHKYVEVPVACIILIGLFALQHYGTHRVGFLFAPVVLIWLLCISAIGLYNIFHWNPHVYQALSPCYMYKFVKKTQKGGWMSLGGILLCITGSEAMFADLGHFSQLSIKIAFTSLVYPSLILAYMGQAAYLSQHHVLDNDYRIGFYVSVPEKLRWPVLVIAILAAVVGSQAIITGTFSIIKQCSALGCFPRVKIVHTSSKIHGQIYIPE…
22	428	Dicotyledons	Sapindales	Clementine	Citrus clementina	16	CicHAK16	I:b	>Ciclev10033923m.g peptide: Ciclev10033923m (PAC:20804106)	MSGSGGVESGERQVALSQDNVKGNKLLPQRYDSLDLESGAVSGYHGRSSKAMKWSVILQLAFQSIGIVYGDIGTSPLYVFSSTFPNGINHADDVLGVLSLILYTLTLIPLIKYVFIVLHANDNGDGGTFALYSLICRYANVSLVPSQQAEDSNVSNFQLELPGNKHSRMASSLKSKLENSRVAKFFLFFATLLGTSMLIGDGVLTPCISVLSAVGGIKEATSAMTEDRVVWISAAILVCVFLFQRLGTDKVGYTFAPILLVWFAFIAGIGIYNIIHYDPTVIKALNPRYIVDYFRNNQQAAWISLGGIILCTTGAEALFADVGHFTVLSIQISTCGVVYPALILAYTGQASFLRKHPDLVSNTFFKSVPGPVYWPMFVVAVLAAIIASQALISGTFSIV…
22	429	Dicotyledons	Sapindales	Clementine	Citrus clementina	17	CicHAK17	I:b	>Ciclev10033931m.g peptide: Ciclev10033931m (PAC:20804695)	MSGSGGVESGERQVALSQDNVKGNKLLPQRYDSLDLESGAVSGYHGRSSKAMKWSVILQLAFQSIGIVYGDIGTSPLYVFSSTFPNGINHADDVLGVLSLILYTLTLIPLIKYVFIVLHANDNGDGGTFALYSLICRYANVSLVPSQQAEDSNVSNFQLELPGNKHSRMASSLKSKLENSRVAKFFLFFATLLGTSMLIGDGVLTPCISVLSAVGGIKEATSAMTEDRVVWISAAILVCLFLFQRLGTDKVGYTFAPILLVWFAFIAGIGIYNIIHYDPTVIKALNPRYIVDYFRNNQQAAWISLGGIILCTTGAEALFADVGHFTVLSIRISTCGVVYPALILAYTGQASFLRKHPDLVSDTFFKSVPGPVYWPMFVVAVLAAIIASQALISGTFSII…
23	430	Dicotyledons	Malvales	Cotton	Gossypium raimondii	1	GrHAK1	V	>Graimondii|Gorai.009G343300|Gorai.009G343300.1	MEEEDRIEESSRVRLRGRTFSGGGVNESRWVDGSEVDSESPPLSLFDDNEAKEGYGSLRRRLVKKPKRVDSFDVEAMEIAGTHGHHPKDISTWRTLALAFQTLGVVYGDMGTSPLYVFSDVFSKVKIESEVDILGALSLVMYTIALLPLVKYVFVVLKANDNGEGGTFALYSLICRYAKVNMLPNRQPADEQISSFRLKLPTPELERALSIKETLERRSSLKTLLLLLVLMGTSMVIGDGILTPAISVMSAVSGLQGAVKGFDTTAVVVFSIVILVALFSIQQFGTSKVGFSFAPALALWFFSLGSIGIYNLVKYDITVIKAVNPAYIYFFFKKNSKDAWSALGGCILCITGAEAMFADLGHFSVPAIQIAFTFVVFPCLLLAYMGQAAFLMKYPESSD…
23	431	Dicotyledons	Malvales	Cotton	Gossypium raimondii	2	GrHAK2	II:c	>Graimondii|Gorai.009G292800|Gorai.009G292800.1	MRHAFYLLYLRQLNWVHWQETLAENRSIIIMDLEYSKFSDASKKGSWKTALLFAYQSLGVVYGDLSTSPLYVYKSTFAEDIQHSESNEEIFGVLSFVFWTLTLVPLFKYVFVVLRADDNGEGGTFALYSLICRHANVSLLPNRQVADEAVSTYKLEHPPEKRSSSRVKVYLEKHKVLHTALLILVLLGTCMVIGDGVLTPAISVFSAVSGLELSMSKEHHQYAVIPITCFILVCLFALQHYGTHRVGFLFAPVVLTWLLCISALGLYNMIHWNPHVYKALSPYYMFKFLKKTKKGGWMSLGGILLCITGSEAMFADLGHFSYAAIQTAFTFLVYPALILAYMGQAAYLSQHHHTSYHISFYVSVPESVRWPVLVIAILASVVGSQAIISGTFSIINQSQ…
23	432	Dicotyledons	Malvales	Cotton	Gossypium raimondii	3	GrHAK3	II:b	>Graimondii|Gorai.004G232600|Gorai.004G232600.1	MNPSEEFLEQGISQQNLRKASCMTVATLAYQSLGVVYGDLSTSPLYVYKTTFSGKLSLHENDEEIYGVFSFIFWTFTLIALFKYTLIVMSADDNGEGGTFALYSLLCRHARLSILPNQQATDEKLSAYATHGSVETWQSSALKSFFEKHPRFRTGLFILVLLGTCMAIGDGVLTPTISVLSAVSGVRLKITALHENYVVLISCVIIVGLFSLQHHGTNRVAFMFAPIVTAWLLCISSIGIYNIFRWNPHIFHALSPVYMLKFLKRTGIEGWISLGGVVLSITGVETMFADLGHFSSLSIRVAFSFLVYPCLVLAYMGEAAFLSKHHEDIQRSFYKAIPEAVFWPVFIVATFAAVVGSQAVISATFSIISQCCALNCFPFVKIIHTSSKIYGQIYIPEVN…
23	433	Dicotyledons	Malvales	Cotton	Gossypium raimondii	4	GrHAK4	I:b	>Graimondii|Gorai.007G129800|Gorai.007G129800.1	MSDDQLKANTPSIPLRKPYGSMDLISTKTPPHHGRHSKDTKWWVVLNLAFQSIGIVYGDIGTSPLYVYSSTFSNGIKHKDDVLGVLSLVFYTLTLLPMIKYVFIVLRATDNGEGGTFALYSLICRYAKVSLIPNQQAEDRQVSNYTLELPSKRLKLASVLKSSLEKSKFAKLFLLLITMLGTSMVIGDSILTPSISVLSAVGGVKEATSALTQDMIAGISIVILVFLFMIQRFGTSKVGYTFAPILSLWFILIGGIGFYNIIKHDTTVLKAINPIYIVEYFIRNKKDAWVSLGGVVLCTTGGEALFADVGHFSVRSIQVSMCSMVYPALILAYTGQSAYLRQHPDSASDAFFKSVPGPMYWPMFVVSILASVIASQAMISGTFSVVHQSLSLGCFPRVK…
23	434	Dicotyledons	Malvales	Cotton	Gossypium raimondii	5	GrHAK5	I:b	>Graimondii|Gorai.007G281600|Gorai.007G281600.1	MSDDQLKRNMRPILHKPYGSMDLVSVKAPANHGSHSKDSNWWVVLNLAFQSIGIVYGDLGTSPLYVYPSIFSNGIKHRDDILGALSLVFYTLTFLPLVKYVFVVLRANDNGEGGTFALYSLICRYARVSLIPSQQAEDREVSNYKLELPSKRLKLASVLKSSLQKSQFAKIFLLLVTMLGTSMVIGDSIFTPSISVLSAVAGVKEVTSALTDDMIAGISVVILIFLFMIQRFGTHRVSYTFAPVLCVWFVLIGGIGFYNIIKHDKTVLKAINPMYIVEYFIRNKKDAWISLGGVVLCTTGAEALFADLGHFSVRAIQVSMCSMVYPALIFAYTGQSSYLRQYPDEVSDAFYKSVPGPLYWPMFVVSILAAAIASQAMISGTFSIVHQSLSLGCFPPVKV…
23	435	Dicotyledons	Malvales	Cotton	Gossypium raimondii	6	GrHAK6	II:a	>Graimondii|Gorai.007G071600|Gorai.007G071600.1	MVIGDGVLTSAIAVMSSLPGLQYSGKKLTKGALLLLACVILISLFALQHIGTHKVAFMFAPIVMLWLISIFCIGLYNIIHWNPKVVSAIYPYYIIKFFRETGRDGWISLGGILLSITGTEAMYADLGHFTAVSIRLAFVFAIYPCLVVQYMGQAAFLSRNLHSIPNSFFESIPDPVFWPIFVVTTLSAVVGSQATITATFSVIKQCQALGCFPRVKIVHTSKHIYGQIYIPEINWMLMILTLSITIGFQDTTLIGNAYGLATATLMFITTFLVALVITFVWQKSIWISGMFLLFFGIIEGAYLSAALMKVPQGGWVPLVLSFIFMMIMYIWHYGMCLKYNFDMHNKVPLQWLLGLGPSLGIVRVPGIGLIYTELATGIPAIFSHFVTNLPAFHKVLVFI…
23	436	Dicotyledons	Malvales	Cotton	Gossypium raimondii	7	GrHAK7	V	>Graimondii|Gorai.002G165400|Gorai.002G165400.1	MYTIALIPLAKYVFANGNGEVMSAVSGLQGEIKGFNTTTVVLVSIVILMALFSIQQFGTSKVGFMFAPALALWFFSLGAIGLYNLLNYDVMVVKGIQSNLYIFFLQEEQQRCMVFSWRLRFVHYRYEAEAMFADLGHFPVPSIQVGSSINSLKNHLGFPFTACLFFMSNSYCLIAFTFVVFPCLLLAYMGQVAYLMKYPETSARIFYDSVPDSLFWPVFMVATVAAMIASISATFSCVKQSMALGCFPRLKIIHTSRRQMGQIYIPVINWFLMIMCVIVVSIFRSTTDIANAYGIAEVVVMLVTTALVTLVMLLIWQSNLLMALCFPLLLGSIKVMEGGWLPLVFATFFFIVMYIWHYGSVLKYQSEVREKISMDFMIELGSTLGTVRFLLSLPAIHST…
23	437	Dicotyledons	Malvales	Cotton	Gossypium raimondii	8	GrHAK8	IV	>Graimondii|Gorai.002G170400|Gorai.002G170400.1	MDLQSGAAVALPELLIDSASGTSHHLDSLHFPLHNTTDSVMLQSSDNKTGRWSNLLLAYKTLGVVFGGLVTSPLYVYPSMHLNSPTEDDYLGIYSIMFWTLTLIGVVKYACIALKADDQGEGGTFALYSLLCRNMNIGILSSKSSDVNSSQSRCVFNEDNKQKSRLGKVFETSMVARRALLFIAMLGTCMLIGDGILTPSISVLSAMDGLRAPFPSISKSLVEALSAVVLFILFLLQKFGTSRVSFLFSPIMGAWTLSTPLVGIYSIIHHYPNIFKALSPYYIFHFFWRNGKEGWLMLGGTILCITGSEALFADLGHFNRSSIQIAFLFTIYPSLILTYAGQTAYLIKNPNDHMDGFYKFIPKSIYWPIFIIATSAAVVASQSLISATFSVIKQSVVLD…
23	438	Dicotyledons	Malvales	Cotton	Gossypium raimondii	9	GrHAK9	II:c	>Graimondii|Gorai.002G164700|Gorai.002G164700.1	MDLETGVYQNFAKKESWRTVLILAYQSLGVVYGDLSTSPLYVYKSTFEEDIQHSETNEEIYGVLSFVFWTLTLVPLLKYVFIVLRADDNGEGGTFALYSLLCRHARVNSLPNCQLADEELIEYKKDSIGLAPQSSFGSRLKSSLEKHRVLQRFLLVLALIGTCMVIGDGILTPAISVFSAVSGLELSMSKEHHKYVEVPVACIILIGLFALQHYGTHRVGFLFAPVVLVWLLCISAIGLYNIIHWNPHVYQALSPYYMYKFFRKTQRGGWMSLGGILLCITGSEAMFADLGHFSQLSIKIAFTFLVYPSLILAYMGQAAYLSQHHIIESDYRIGFYVSVPEKLRWPVLVIAILAAVVGSQAIITGTFSIIKQCSSLGCFPRVKIIHTSSKIHGQIYIPE…
23	439	Dicotyledons	Malvales	Cotton	Gossypium raimondii	10	GrHAK10	II:b	>Graimondii|Gorai.002G105200|Gorai.002G105200.1	MSMESKTCSTTQVSRLKSCRTTLCLPYQSFGVVYGDLCTSPIYVYKSIFSGSLFPYREDHEIFGVLSLIFWTLTIIPLLKYAVFVLGADDNGEGGTFALYSLLCRHSRMGLLNATNEADKHESIEKAEEPVEDTGTSLLIKQFFEKHHSSQVVLLLVVLLGTSMVIGDGILSPTMSVLSAVSGLQVKVTDLHDNCILFFACTILVGLFALQHYGKHNVGFLFAPILICWLICITGVGIYNIYHWNPCVLHAVSPYYIYNFFKKAGKDGWSSHGGIVLCITGAEAMYADLGHFSKLSIRIGFTAVVYPCLVLAYMGEAAYLSKHRMNLQSSFYKAIPDAVFWPVFIIATLATVVGSQAIISATFSVINQCRALTCFPRVKIIHTSKQINGQIYIPEINWI…
23	440	Dicotyledons	Malvales	Cotton	Gossypium raimondii	11	GrHAK11	I:a	>Graimondii|Gorai.002G213100|Gorai.002G213100.1	MAENVEKGEEIEMAAAEADKNQLTERKFSWAKLRRVDSLNLEAGRLSFSSTKSPHSKVDWMRTLSLAFQSIGVIYGDIGTSPLYVYASTFTDGIGHQDNLIAVLSLIIYSIVLIPFFKYAFLVLRANDNGEGGTFALYSLLCRHVKLSLLPNQQPEDRELSNYQLDTPSSQLNRAYKIRGKMENSLKAKLAIFVVTILATSMVIGDGVLTPSISVLSAVGGIDSLGQDAVVGISVVILVILFCVQRFGTDKLGYSFAPIICLWFTLLSGSGLYNLFTYGWGVLRAFNPLYIVGYFKRRGKNGWISLGEVVLCITGTEAMFADLGHFSVRAVQISFSTITLPSLLTVYCGQAAYLTKHPEHVGDTFYKSIPDPLYWPTFVVAVAASIIASQAMISGAFSI…
23	441	Dicotyledons	Malvales	Cotton	Gossypium raimondii	12	GrHAK12	I:a	>Graimondii|Gorai.002G213000|Gorai.002G213000.1	MEENKPGMAENVEKGEEIEMAVAEADKNRLKERKFSWAKLHRVDSLNLEAGRLSFSSTKSPHSKVDWMRTLSLAFQSIGVIYGDIGTSPLYVYASTFTDGIGHQDNLIAVLSLIIYSIVLIPFFKYAFLVLRANDNGEGGTFALYSLLCRHVKLSLLPNQQPEDRELSNYQLDTPSSQLNRAYKIRGKMENSLKAKLTIFVVTILATSMVIGDGVLTPSISVLSAVGGIDSLGQDAVVGISVAILVILFCVQRFGTDKVGYSFAPVICLWFTLLSGIGLYNLFTYDWGVLRAFNPLYIVDYFKRRGKDGWISLGGVVLCITGTEAMFADLGHFNVRAVQISFSTITLPALLTVYSGQAAYLTKHPEHVGDTFYKSIPDPIYWPTFVVAVAASIIASQAM…
23	442	Dicotyledons	Malvales	Cotton	Gossypium raimondii	13	GrHAK13	II:a	>Graimondii|Gorai.003G084100|Gorai.003G084100.1	MVDRSYQCKDVLILAYQSFGVLFGDLSISPLYVFKSTFSGNLSNYQSEDVIFGALSLIFWTLTLLSLFKHVIILLNADDNGEGGIFALYSLLCRHAKFSLLPNHQTADEELSTYHNPRYSYRNPQSLTVKRFAERHKKAKTALLLLVLFGTCLLICVGFLTPAISIRSAIEGVKVRSSELHYGVVLIIACILLVGLFVLQHRGTYRVAFMFAPIVILWSLSIAAIGVYNILKWNPRVYKALSPYYIYTFFRDTRYDGWISLGGVLLCVTGAEAMFADLGQYTAASIRLSFFCIIYPCLVLQYMGQAAFLSKNFAAVSTSFYASIPDSLFWPVLVMATLAAIVASQSVISATFSIVKQCYAIGCFPRVKVVHKSKWFRGQIYIPEINWVLLVLCLAVTVG…
23	443	Dicotyledons	Malvales	Cotton	Gossypium raimondii	14	GrHAK14	III	>Graimondii|Gorai.005G267900|Gorai.005G267900.1	MEMGSRTEVDEDGDNNKGRMWDLDQQFDRSIEEEAGRLKNMYTEKQTSPLLLLRLAFQSLGVVYGDLGTSPLYVFYNTFPEEIVDPEDVVGALSLIIYSLTLIPLLKYVFVVCKANDNGQGGTFALYSLLCRHANVKIIPNQHRTDEELTTYSCSTLIHEKSFAAKTKRWLEKDTYRKNALLILVLFGTCNVIGDGILTPAISVLSASGGLKVAHPRMSNGVFLPFHTHYSFSYSSLFLSFLSIFLLSLFFFPCAGVILVVAVVILVGLFSMQHYGTDKVSWLFAPIVFLWFITTGGIGAYNIWKYGSSVLKAFSPVYIFRYFKRRRKDGWTSLGGIMLSITGTEALFADLAHFSVSAVQLAFTVVVFPCLLLAYSGQAAYLFNKGDHVIDPFYRSIPD…
23	444	Dicotyledons	Malvales	Cotton	Gossypium raimondii	15	GrHAK15	V	>Graimondii|Gorai.011G105200|Gorai.011G105200.1	MDSVKTALFKRHSNYNISVDEIGMKLDFVWAPYVLNLTHLLTDFKIKKKYPDVMVMGAGLWHMLHVSNPSDYELVLQTLKSSLVSLFPFSADIANAYAEVVVMLVTTALVTLVMLLIWQTNLLMALCFPLLIGSIKLIYFSAVLSKHYGSVLKYQSEVREKISMDFMIELGSKLGTVRVPGIDLLYNELVHGIPSIFGQFLLSLPAIHFTIIFVCIKYVPVPVVPQEERFLFRRVGPKDYHIFKCIARYENFLLKEAQDLALESRLHEMDIDSVFVSSKDHRNRDVPGNKELKIPLMRERRSEEAISCILKKAPASLPSSVMSSDEDLGLEYELSALRQAIDSGFTYFLAHGDVRAKKNILFLKKLVINYFYAFLQRNCRVGAANMSVPHMNILQVGMT…
23	445	Dicotyledons	Malvales	Cotton	Gossypium raimondii	16	GrHAK16	II:b	>Graimondii|Gorai.011G051700|Gorai.011G051700.1	MPFFSIFLELRVPIYFPFEYPFWNRSFLGKIKKIKKRTHCFMDPEAGSVTRESRLKFYKATLCLAYQSFGVVYGDLSSSPLYVYKSTFSGRLRLHEEDDEILGVLSLVFWTLTLIPLCKYIIFVLGADDNGEGGTFALYSLLCRRAKLGLLSASDASDDDISAYNSGLPRKETVASSILKEFFDKYHSSRIVLLLLVLLGTSMVIGDGILTPSMSVLSAVNGIRIKAPSLHENYTVFIAGVILVGLFALQHFGTRNVGYLFAPILLAWLFCISVIGVYNTIYWNPHVVSALSPYYVYNFFKKAGKDGWSSLGGIVLCITGAEAMFADLGHFSQLSIRIAFTVIVYPCLVLAYMGEAAYLSKHKEDLQKSFYKAIPEVVFWPVFIIATLATMVGSQAIIS…
23	446	Dicotyledons	Malvales	Cotton	Gossypium raimondii	17	GrHAK17	III	>Graimondii|Gorai.008G049100|Gorai.008G049100.1	MKMTSRIEMDEDNDNRGSMWDLDQKLDQPMDEEAGRLRNMYKEKKSSALLLLRLAFQSLGVVYGDLGTSPLYVFYNTFPGKIEDPEDVVGALSLIIYSLTLIPLLKYVFVVCKANDNGQGGTFALYSLLCRHAKIKTIPNQHRTDEELTTYSRSTFHEQSFAAKTKRWLERHVSRKNALLILVLVGTCMVIGDGILTPAISVLSAAGGIKVDHPSMSNGVVVVVAVVILVGLFSLQHYGTDKVSWLFAPIVLVWFLVIGGIGIYNIWKYDSSVLKAFSPVYIYRYFRRGGKDGWTSLGGIMLSITGTEALFADLSHFPVAAVQLAFTVVVFPCLLLAYSGQAAYLMSNRDHVVDAFYRSIPDSIYWPVFIIATAAAIVASQATITATFSIIKQALALGC…
23	447	Dicotyledons	Malvales	Cotton	Gossypium raimondii	18	GrHAK18	II:c	>Graimondii|Gorai.008G291400|Gorai.008G291400.1	MDSPLRHGTYCYPFKKETWMHTILLSFQSIGVVYGRLSTAPLYVFGSIPQNDFKSDESAYEYFSFIFWTLTVLSLVKYTFIVLKADNDGEGGTFALYSLLCKHAKVGLLPNDKTSDDVTNNETGSPSRTKAESRARRAIAKHKSSHYLMLFLALFGSCMIICDAVLTPAISVLSAASGLRRSLTDIKYSSSRKTEDSVLKDLRKYVPVPTACAILVCLFTLQQYGSHRIGSIFAPVVILWLLFITGVGIYNIFHYDPHIVFAISPKYMYKFFQSISWRSWRSLGSITLCVAGSEAMFADIGHFSTKSIKMTFVCLIYPVLILSYAGQAAFISHALSIKDSSFAIEDYNHFYRSVPDHIHYVFTILSLLASAIGSQATITACFSIVNQCLALGCFPRVKV…
23	448	Dicotyledons	Malvales	Cotton	Gossypium raimondii	19	GrHAK19	V	>Graimondii|Gorai.008G015600|Gorai.008G015600.1	MAEVGAGSGGSSSSRREEINGAGLSSMDSLESRWVFQDEDDSEIDDEEDDDDYDDAPHLAGVDSDDEDTQDQRLIRTGPRIDSFDVEALEVPGAPRSDYEDFGMGRKIVLAFQTLGVVFGDVGTSPLYTFSVMFSKAPINGNEDVIGALSLVIYTLILIPLIKYVLVVLWANDDGEGGTFALYSLICRHAKVSLLPNQLPSDARISSFRLKVPSAELERSLKIKERLETSLTLKKLLLVLVLAGTSMVIADGVVTPAMSVMSAVGGLKVGVDAIEQDEVVMISVAFLVILFSVQKFGTSKVGLAVGPALFIWFCSLAGIGIYNLLKYDTSVLKAFNPVHIYLYFKRNSVKAWYALGGCLLCATGSEAMFADLCYFSVQSIQLTFVFLVLPCLLLGYLGQ…
23	449	Dicotyledons	Malvales	Cotton	Gossypium raimondii	20	GrHAK20	I:b	>Graimondii|Gorai.008G009900|Gorai.008G009900.1	MPTDDFVQEEPIEQTHHNDDDSEDVESADTHHPKTDPSLHKLHRFDSMDLESTKVPSHHIRASQAVEWSVILQLAFQSIGVVYGDIGTSPLYVYASTFADGIKNSDDILGVLSLIFYTITLIPLIKYVFIVLRANDNGEGGTFALYSLICRYARVGLIPSQQAEDRDVSNFQLELPSNRLRRASKLKSKLENSQFAKFFLLIITMLGTSMVIGDGVLTPCISVLSAVGGIKEATSAMTEDRIVWISTAILICLFMVQRFGTDKVGYSFAPIICVWFSLIGGIGVYNFIKFDPTVIKAINPKYIVDYFKRNKKDAWVSLGGVVLAITGTEALFADVGHFTVRSIQISMCSVTYPALIMAYTGQASFLRKHQSLVSDTFFKSIPHSLYWPMFVVAVAAAII…
23	450	Dicotyledons	Malvales	Cotton	Gossypium raimondii	21	GrHAK21	II:a	>Graimondii|Gorai.012G082500|Gorai.012G082500.1	MGPELGISIPSPPRNPSSLSWVNLSRNLILAYQSLGVVYGDLSTSPLYVYSSTFIGNLQDHQNEDAIFGAFSLIFWTLTLIPLLKYVFIMLGADDSGEGGTFALYSLLCRHAKFSLLPNQQAADEELSAYKYGPSMQVATGSPLKRFLEKHKTLRTALLVVVLFGASMVIGDGVLTPAISVLSSVSGLQVTEKKLASGEIVVLACVILVGLFALQHFGTRRVAFMFAPIVIIWLVSIFSIGLYNIIFWNPKIVRAISPYYIIKFFRETGKDGWFSLGGILLSVTGTEAMFADLGHFTALSIRLAFAFVVYPCLVVQYMGQAAFLSRNPQKVLNSFYDSIPGPVFWPIFVIATLATIVGSQAIITATFSLIKQCHALGCFPRVKVVHTSKHIRGQIYIPE…
23	451	Dicotyledons	Malvales	Cotton	Gossypium raimondii	22	GrHAK22	V	>Graimondii|Gorai.012G142000|Gorai.012G142000.1	MAEEVISGSGSSGREGEINIRVGLTSRDSLDSRWVFPGEDDSEIEDNGDGDDDLPHRAAVDSEGEDNQEHRLIRTEPRVDSFDVEALEVHGAHRSDYEDLGIARRIIHAFQTLGVVFGDVGTSPLYTFSVMFSKAPIKGDEDVIGALSLVLYTLLLVPLVKYVLIVLWANDDGEGGTFALYSLICRHANVSLLPNQLPSDTRISNFILKLPSPELERSLKIKERLEASLTLKKLLLMLVLAGTSMVIADGVVTPAMSVMSAVGGLKVGVAAIEQDEVVMISVTFLVILFSVQKFGTSQVGLAVGPALFIWFCSLAGIGIYNLIKYDASVLRAFNPVHIYLYFKRNSVNAWYALGGCLLCATGSEAMFADLCYFSVRSIQLTFVFLVLPCLLLGYLGQAA…
23	452	Dicotyledons	Malvales	Cotton	Gossypium raimondii	23	GrHAK23	II:c	>Graimondii|Gorai.012G171200|Gorai.012G171200.1	MDLETGFHHKESWRTVLTLAYQSLGVVYGDLSTSLYVYKSTFDEDIHHSETNEEIYGVLSFVFWTLTLVPLLKYVFIVLKADGNGEGGTFALYSLLCRHARVNSLPNCQLADEELSEYKKDGGVNGLSPKSNLGSRLKSSLEKHRVLQRFLLVLALIGTCMVIGDGILTPAISVFSAVSGLELSVLKEHHKYVEVPVTCIILICLFALQHYGTHRVGYLFAPVILIWLLCISSIGLYNIMYWNPHVYRALSPFYMRLVVLGGILLCITGSEAMFADLGHFSQLSIKIAFTSLVYPSLILAYMGQAAYLSWHHNIKSDYQIGFYVSVPEKLRWPVLVIAILAAVVGSQAIITGTFSIIKQCSSLGCFPKVKIVHTSSKIHSQIYIPEINWLLMVLCLAVT…
23	453	Dicotyledons	Malvales	Cotton	Gossypium raimondii	24	GrHAK24	II:c	>Graimondii|Gorai.012G060500|Gorai.012G060500.1	MDLEGAIPTSPIKKKESWKTVLSLAYQSLGVVYGDLSTSPLYVYKSAFAEDIQHSDTNEEIFGVLSFVFWTLTLMPLLKYVFIVLKADDNGEGGTFALYSLLCRHARVCSLPNCQLADEELSEYKKDGMASNNNRSFWGSSLKSTLEKHKILQRLLLVLALIGTCMVIGDGVLTPAISVFSAVSGLELSMSKEQHRYVEVPAACAILIFLFALQHYGTHRVGFLFAPVVITWLLCISAIGVYNIFYWNPKVYQALSPFYMYKFLKKTQKGGWMSLGGILLCITGSEAMFADLGHFSQLSIKIAFTFVVYPSLILAYMGQAAYLSKHHILETNYRIGFYVSVPEKIRWPVLVIAIFAAVVGSQAIITGTFSIIKQCSALGCFPRVKIIHTSSKMHGQIYI…
23	454	Dicotyledons	Malvales	Cotton	Gossypium raimondii	25	GrHAK25	II:c	>Graimondii|Gorai.012G014200|Gorai.012G014200.1	MDLEFGKSLDTSKKNSWRTSLLLAYQSLGVVYGDLSTSPLYVYKSTFAEDIQHSETNEEIFGVLSFVFWTLTLVPLFKYVFVVLRADDNGEGGTFALYSLICRHARVSLLPNRQVADEALSTYKLEHHPEKKSSSGVKLYLEKHKVLHTALLILVLLGTCMVIGDGVLTPAISVFSAVSGLELSMSKEHHQYAVIPITCFILVCLFALQHYGTHRVGFFFAPIVLTWLLCISSLGIYNIIYWNPHVYQALSPYYMFKFLKKTRKGGWMSLGGILLCITGSEAMFADLGHFSYSAIRTAFTFLVYPALILAYMGQAAYLSQHHHTSYQISFYVSVPESVRWPVLIIAILASVVGSQAIISGTFSIINQSQSLSCFPRVKVIHTSDKIHGQIYIPEINWVL…
23	455	Dicotyledons	Malvales	Cotton	Gossypium raimondii	26	GrHAK26	II:c	>Graimondii|Gorai.006G029100|Gorai.006G029100.1	MDFGPNKRESWKNVLTLAYQSLGVVYGDLSTSPLYVYKSAFAEDIHHSETNEEIYGVLSFVFWTLTLMPLLKYVFIVLKADDNGEGGTFALYSLLCRHARLCSLPNCQLADEELSEYQKDGISSISKSFLGSSLKSTLEKHKLLQRLLLVLALIGTCMVIGDGVLTPAISVFSAVSGLELSMSKEQHRYVEVPAACAILVFLFALQHYGTNRVGFLFAPVVITWLLCISAIGIYNICEWNPHVYQALSPYYMYKFLKKTQKKGWMSLGGILLCITGSEAMFADLGHFSQLSIKVAFTFVVYPSLILAYMGQAAYLSKHHINETDYRIGFYVSVPEKIRWPVLVIAILAAVVGSQSIITGTFSIIKQCSALGCFPKIKIIHTSSKIHGQIYIPQINWTLM…
24	456	Dicotyledons	Malvales	Cocoa	Theobroma cacao	1	TcHAK1	II:b	>Tcacao|Thecc1EG042171|Thecc1EG042171t1	MNNPSEEFLEQGISQQNLRKASCMTVVTLAYQSLGVVYGDLSTSPLYVYKTTFSGKLSLRENDEEIYGVLSFIFWTFTFIALFKYILIVMSADDNGEGGTFALYSLLCRHGSLSILPNQQATDETLSAYATHGSMETWQSSALKSFFEKHPRFRKGLFIFVILGTCMTIGDGVLTPTISVLSAVSGVKLKITALHENYVVLISCVIIVGLFSLQHHGTHRVAFMFAPIVAAWLLCISSIGIYNIFRWNPHIFHALSPVYMLKFLKSTGTEGWISLGGVVLSITGVETMFADLGHFSSLSIRVAFTFLVYPCLVLAYMGEAAFLSKHHEDIQRSFYKAIPEAVFWPVFIVATFAAVVGSQAVISATFSVISQCCALNCFPYVKIIHTSSKIYGQIYIPEV…
24	457	Dicotyledons	Malvales	Cocoa	Theobroma cacao	2	TcHAK2	I:b	>Tcacao|Thecc1EG004580|Thecc1EG004580t1	MSNTGVQEAIEESHVEVPEDQREGINGGSLQKLRSGDSLDLESGKVPGRNSLGSQVCDCDPLASFSLLKFGRQKTKMFDVLVILYSNMVEMVEMILEALKWSVTLHLAFQSIGIVYGDIGTSPLYVFASTFSNGINHRDDILGVLSLIFYTLTLIPLVKYVIIVLRATHNGEGGTFALYSLICVHVRVGLMPNQQAEDCDVSNFRLDLPGKHLKLASRLKSNLEEPIFQNFPIIHYYAWYFHGHWRRYPHAMHIRFLLFLVFLSAMGGIRKATSAMTEDRIFWISIAILVCIFMVQRFGTGKVGYSFAPLICIWFALISGIGVYNFIKYDPTVLKAINPKYIVEYFTRNKKDAWVSLGGVVLAITGTEALFADVGHFTVQSIRISMCAVTYPALILAYT…
24	458	Dicotyledons	Malvales	Cocoa	Theobroma cacao	3	TcHAK3	I:b	>Tcacao|Thecc1EG004579|Thecc1EG004579t1	MSNNTVVQDSIEETDHDEVTQDQLEEKNHSFPKLRSYDSLDLECAKVPGHHDRGSQDLEWSTILNLAFQSIGIIYGDIGTSPLYVYSSTFASGINHSDDILGVLSLIFYTITLIPLIKYVFIVLRANDNGEGGTFALYSLICRYARVSLIPSQQAEDSDVSNFKLQLPSNRLKRASKLKSKLENSNFAKTFLLIITMLGTSMVIGDGVLTPCISVLSAVGGIKEAKSTLSEETIVWTSIAILIGLFMVQRFGTDKVGYTFAPIICVWFTLIGGIGVYNFFKFDPTVVKAINPLYIIDYFRRNKKDAWVSLGGVVLATTGTEALFADVGHFTVRSVQISMCTVTYPALVLAYAGQASFLRKHENLVADTFFKSIPGPLYWPMFVVAVAAAIIASQAMISG…
24	459	Dicotyledons	Malvales	Cocoa	Theobroma cacao	4	TcHAK4	I:b	>Tcacao|Thecc1EG004577|Thecc1EG004577t1	MSSVFVQHPIQETGEDQAVESKDTHEEVSNGKKHPGHKCLRRYDSLDLESAKVISSHYDRVSQVVEWSVILQLAFQSIGVVYGDIGTPPLYVYAGTFAKGGTFALYSLICRCARMGLIPSQQAEDRGVSNFQLELPTEGLKRASKIKSKLENRQFAKLFLLTITMLGTPMVIGDGVLTPCISVLSAVGGIKEATAAMTEDRIVWISVAIWVCLFMVQRFGTDKVGYRFAPILCVWRNKKDAWVSLGGIVLAITGTEALFADVGHFTVRSIQISICTVTCPALILAYTGQFSFLRKHENFVSDAFFKSIPGPLYWPMFVLDVAAAIIAIVHTSAKYEGQVYIPEVNYLLMLACVGVTVGVRTTEKIGDAYGIAVVFVMTPTSSLLVLLMIMIWKTSILLV…
24	460	Dicotyledons	Malvales	Cocoa	Theobroma cacao	5	TcHAK5	II:b	>Tcacao|Thecc1EG029308|Thecc1EG029308t1	MDPEAGSVTRESRLKIYRTTLCLAYQSFGVVYGDLSTSPIYVYKSTFSGRLSLHEEDDEILGVLSLVFWTLTLIPLCKYIIFVLGADDNGEGGTFALYSLLCRRAKLGLLSASDAPDDDISAYNSGLPRKETVASSILKEFFDKYQSSRIVLLLLVLLGTSMVIGDGILTPSMSDEPYEIEYNCFLLLDLMASKLRPPVFMIVSQTSIFDLPLECRIPFQLLQDYTVLIACVILVGLFELQHVGTRRVGFLFAPILLAWLFCISVVGIYNIIHWNPRVISALSPYYVYNFFKKTGKDGWSSLGGIVLCVTGAEAMFADLGHFSQLSIRIAFTVVVYPCLILAYMGEAAYLSKHKVDLQRSFYKSIPEVVFWPVFIIATLATVVGSQAIISATFSIISQC…
24	461	Dicotyledons	Malvales	Cocoa	Theobroma cacao	6	TcHAK6	II:c	>Tcacao|Thecc1EG045548|Thecc1EG045548t1	MDLEFGKTLDASKKGSWKTASLLAYQSLGVVYGDLSTSPLYVYKSTFAEDIQHSETNEEIYGVLSFVFWTLTLLPLFKYVFVVLRADDNGEGGTFALYSLICRHARVSLLPNRQVADEALSTYKLEHPPEKKSSSRVKMYLEKHKVLHTALLILVLLGTCMVIGDGVLTPAISVFSAVSGLELSMSKEHHQYAVIPITCFILVCLFALQHYGTHRVGFFFAPIVLTWLLCISALGLYNIIHWNPHVYQALSPYYMFKFLKKTRKGGWMSLGGILLCITGSEAMFADLGHFSYAAIQTAFTFLVYPALILAYMGQAAYLSQHHPTSYQISFYVSVPESVRWPVLVVAILASVVGSQAIISGTFSIINQSQSLGCFPRVKVIHTSDKIHGQIYIPEINWVL…
24	462	Dicotyledons	Malvales	Cocoa	Theobroma cacao	7	TcHAK7	II:b	>Tcacao|Thecc1EG032570|Thecc1EG032570t1	MSMESETGSTTQVSRLKFYRTTLCLAYQSFGVVYGDLCTSPIYVYKSTFSGRLQPYSEDHEIFGVLSLIFWTLTIIPLLKYAVFVLGADDNGEGGTFALYSLLCRHSRMGLLNTANVADEHVSTDKSEEPIEDTRTSLLIKQFFEKYHSSRVVLLLVVLLGTSMVIGDGILTPTMSVLSAVSGLQIKFTDLNENHTVFFACIILVGLFALQHYGTHRVGFLFAPILIGWLICITGVGIYNIFHWNPHVLCAVSPHYIYNFFKRAGKDGWSSLGGIVLCITGAEALFADLGHFSPLSVRIGFTAVVYPCLVLAYMGEAAYLSKHRMNLQSSFYKAIPEAVFWPVFIIATLATVVGSQAIISATFSIISQCRALSCFPRVKIIHTSKKIHGQIYIPEVNWM…
24	463	Dicotyledons	Malvales	Cocoa	Theobroma cacao	8	TcHAK8	II:a	>Tcacao|Thecc1EG016366|Thecc1EG016366t1	MVDRRYQWKEVLLLAYQSFGVLFGDLSISPLYVYKSTFSGKLSNYQTEDVIFGAFSLIFWTFTLLSLFKHVIILLNADDNGEGGIFALYSLLCRHAKFSLLPNHQAADEELSTYHVLRYSSRNLQSSSAKKFAERHKKLKTALLLLVLFGTCLVICVGFLTPAMSVRSSIEGLKVRSNNLHYGVVVVIACILLVGLFVLQHRGTYRVAFMFAPILILWSLCIAAIGLYNIIKWNPRIYEALSPYYIYKFFRDTGRDGWISLGGVLLCITGTEALFADLGQYTAASIRLSFCGIIYPCLVLQYMGQAAFLSKNFAAVSTSFYASIPDSLFWPVLVLATLAAMVASQSVISATFSIVKQCYAIGCFPRVKIVHKSKWFRGQIYIPEINWVLLILSLAVMIG…
24	464	Dicotyledons	Malvales	Cocoa	Theobroma cacao	9	TcHAK9	II:c	>Tcacao|Thecc1EG012983|Thecc1EG012983t1	MFTFVSLLLLFFIDAPLSPGTYSNPFQKETWMHTILLSFQSLGVVYGRLSTAPLYVFGSIPPKDFKSEESVYEYFSFIFWTLTIVSLVKYAFIVMRADDDGEGGTFALYSLLCRHAKVGLLPNDKSANDVMHYEAGSPLRTKVKSRARRAIAKHKSSHYLMLFLALFGSCMIIGDAVLTPAISGLTNLTKFSIFGIVFFLWFYQLHQAFNDHYQISNVRASISSSRETDEFMSKKLKKYVSVPCACAILVYLFTMQHYGSHKIGFIFAPIVILWLLLIGGVGIYNIVHCDPKIICAISPTYMYTFVKNISVESWRALGSVILCVAGSEAMFADLGHFSMKSIKAINLAAFISHALSPKNNSDVPEDYNHLYKSVPKHVHHVFIILSLLASAIGSQATIT…
24	465	Dicotyledons	Malvales	Cocoa	Theobroma cacao	10	TcHAK10	II:c	>Tcacao|Thecc1EG016852|Thecc1EG016852t1	MDLEGVIPKSPIKKESWKTVLTLAYQSLGVVYGDLSTSPLYVYKSAFAEDIQHSDTNEEIYGVLSFVFWTLTLIPLVKYVFIVLRADDNGEGGTFALYSLLCRHARVCSLPNCQLADEELSEYKKDGMVSNNKSFLGTSLKTTLEKHKILQRALLVLALIGTCMVIGDGVLTPAISVFSAVSGLELSMSKEQHRYVEVPAACAILIFLFALQHYGTNRVGFLFAPVVITWLLCISAIGVYNIVQWNPHVYQALSPYYMYKFLKKTQKGGWMSLGGILLCITGSEAMFADLGHFSQLSIKIAFTFVVYPSLILAYMGQAAYLSMHHINETDYRIGFYVSVPEKIRWPVLVIAILAAVVGSQAIITGTFSIIKQCSALGCFPRVKIIHTSSKIHGQIYIPE…
24	466	Dicotyledons	Malvales	Cocoa	Theobroma cacao	11	TcHAK11	II:a	>Tcacao|Thecc1EG017384|Thecc1EG017384t1	MEPEYGISTPIRNPSPLSWVNLSRNLILAYQSLGVVYGDLSTSPLYVYSSTFIGKLQNHQNEEAIFGAFSLIFWTITLIPLLKYVFILLSADDNGEGGTFALYSLLCRHAKFSLLPNQQAADEELSAYKYGPSTQAAGSSPLKRFLEKHKRLRTALLVVVLFGASMVIGDGVLTPAISVLSSVSGLKVTEKKLTNGEVLLLACVILVGLFALQHFGTHRVAFMFAPIVIIWLVSIFSIGLYNIIHWNPKIIRAISPYYIIKFFRETGKDGWISLGGILLSITGTEAMFADLGHFTAFSIRLAFAFVIYPCLVVQYMGQAAFLSRNLQSIRNSFYDSIPGSVFWPVFVIATLAAIVGSQAVITATFSIIKQCHALGCFPRVKIVHTSKHIYGQIYIPEIN…
24	467	Dicotyledons	Malvales	Cocoa	Theobroma cacao	12	TcHAK12	V	>Tcacao|Thecc1EG010269|Thecc1EG010269t1	MEEGDRIEESSSVRLTGRTYSGGGVGESRWVDGSEVDSESPPWSLLDENEGKEGYGSLRRRLVKKPKRVDSFDVEAMEIAGAHGHRSKDLSTWRTLALAFQTLGVVYGDMGTSPLYVFSDVFSKVNIESDVDILGALSLVMYTIALVPLAKYVFVVLQANDNGEGGTFALYSLICRYAKVNMLPNRQPADEQISSFKLKLPTPELERALNIKETLERRSSLKTLLLLLVLMGTSMVIGDGILTPAISVMSAVSGLQGEIKGFNTTAVVVVSIVILVALFSIQRFGTSKVGVMFAPALALWFFSLGSIGIYNLVKHDITVIKAFNPAYIYFFFKKNSRDAWSALGGCVLCITGAEAMFADLGHFSVRAIQIAFTFVVFPCLLLAYMGQAAYLMRYPDSSG…
24	468	Dicotyledons	Malvales	Cocoa	Theobroma cacao	13	TcHAK13	IV	>Tcacao|Thecc1EG011180|Thecc1EG011180t1	MDIQSEAARTEVVADSASTNGHHCDYLHYPQGSTAMVQSTDNKDTFSWSNLILAYKTLGVVFGGLVTSPLYVYPSMTLNSPTEEDYLGIYSIMFWTLTLIGVVKYASIALKADDQGEGGTFALYSLLCRNMNIGILSSKHSYLNSSRSRSVLHEGTKGKSRLGKVFETSIVARRLLLFIAMLGTCMLIGDGILTPAISVLSAMDGLRAPFPSVSKSLVEALSAVVLFVLFLLQKFGTSRVSFLFSPIMGAWTLSTPLVGIYSIIHHYPSIFKALSPHYIIRFFWRNGKEGWLMLSGTILCITGSEALFADLGHFNRSSIQIAFLFTIYPSLVLTYAGETAYLIKNPNDHKDAFYKSIPKIVYWPIFIIATSAATVASQSLISATFSVIKQSVVLGYFPR…
24	469	Dicotyledons	Malvales	Cocoa	Theobroma cacao	14	TcHAK14	V	>Tcacao|Thecc1EG007485|Thecc1EG007485t1	MAEEVSAGSGGGSSSERGGEINGVGLASMDSLESRWVFQDEDDSEIDDEEDDDDDDDDAPHRAGVDSEDEDTPEQRLIRTGPRIDSFDVEALEVPGTHRSEYEDFGIGRKIILAFQTLGVVFGDVGTSPLYAFSVMFSKAPINGDEDVIGALSLVLYTLILIPLIKYVLVVLWANDDGEGGTFALYSLICRHAKVSLLPNQLPSDTRISSFRLKVPSAELERSLKIKERLETSLTLKKLLLMLVLAGTSMVIADGVVTPAMSVMSAVGGLKVGVAAIEQDEVVMISVAFLVILFSVQKFGTSKVGLAVGPALFIWFCSLAGIGIYNLLKYDASVLRAFNPVHMYLYFKRNSVKAWYALGGCLLSATGSEAMFADLCYFSVRSVQLTFVFLVLPCLLLGY…
24	470	Dicotyledons	Malvales	Cocoa	Theobroma cacao	15	TcHAK15	I:a	>Tcacao|Thecc1EG008264|Thecc1EG008264t1	MAENAEKVEEIEMTAEADNKNRLKDRKFSWAKLRRVDSLNLEAGRLSFSSSKTTHSKVDWSTTLSLAFQSIGVVYGDIGTSPLYVYSSTFPDGIGDQDNLIAVLSLIIYTIVLVPFFKYAFVVLRANDNGEGGTFALYSLLCRHLKASLIPNQQPEDRELSNYQLDTPSSQLKRAYKIRGKIENSKLAKVLLFLVTILGTSMVIGDGVLTPSISVLSAVSGIKSLGKDAVVGISVVILIILFSAQRFGTDRVGYSFAPIICLWFAFLSGIGLYNLFTYGWGVLRAFNPLYIVEYFKRRGKHGWVSLGGVVLCITGTEAMFADLGHFNVRAIQMSFSGVALPSILIAYCGQAAYLTKHPNDVEDSFYKSVPNPLYWPTFVVAVSAAIIASQAMISGAFSI…
24	471	Dicotyledons	Malvales	Cocoa	Theobroma cacao	16	TcHAK16	III	>Tcacao|Thecc1EG006029|Thecc1EG006029t1	MEMASRVEIDEDSDNNKGSMWDLDQKLDQPMDEEAGRLRNMYREKKSSVLLLLRLAFQSLGVVYGDLGTSPLYVFYNTFPGTIEDPEDVVGALSLIIYSLTLIPLLKYVFVVCRANDNGQGGTFALYSLLCRHAKIKTIPNQHRTDEELTTYSRSTFHEQSFAAKTKRWLERHVSRKNALLILVLVGTCMVIGDGILTPAISVLSAAGGIKVDHPNMSNDVVVVVAVVILVGLFSMQHYGTDRVSWLFAPIVLLWFLVIGGIGIFNIWKYDSSVLKAFSPVYIFRYFKRGGKEGWTSLGGIMLSITGTEALFADLAHFPVSAVQLAFTVVVFPCLLLAYSGQAAYLMTHRDHVVDAFYRSIPDSIYWPVFVIATAAAIVASQATISATFSIIKQALAHG…
24	472	Dicotyledons	Malvales	Cocoa	Theobroma cacao	17	TcHAK17	II:c	>Tcacao|Thecc1EG010271|Thecc1EG010271t1	MDQETGVYRNYAKKESWRTVLTLAYQSLGVVYGDLSTSPLYVYKSTFEEDIQHSETNEEIYGVLSFVFWTLTLVPLLKYVFIVLRADDNGEGGTFALYSLLCRHARVNFLPNCQLADEELIEYKKDSIGVAPKSTFGSSLKSTLEKHRVLQRFLLVLALIGTCMVIGDGILTPAISVFSAVSGLELSMSKEHHKYVEVPVACIILIGLFALQHYGTHRVGFLFAPVVLIWLLCISAIGLYNIIHWNPHVYQALSPYYMYKFLRKTQRGGWMSLGGILLCITGSEAMFADLGHFSQLSIKIAFTSLVYPSLVLAYMGQAAYLSRHHIIESDYRIGFYVSVPEKLRWPVLVIAILAAVVGSQAIITGTFSIIKQCSALGCFPRVKIVHTSSKIHGQIYIPE…
25	473	Dicotyledons	Brassicales	Papaya	Carica papaya	1	CpHAK1	II:c	>Cpapaya|evm.TU.supercontig_140.40|evm.model.supercontig_140.40	MDLEGVNRAIRSNPIKKDSWKTVLTLAYQSLGVVYGDLSTSPLYVYKSTFAEDIQHSETNEEIFGVLSFVFWTLTLIPLVKYVFIVLRADDNGEGGTFALYSLLCRHVRVSSLPNCQLADEELSEYKNDGIGSSLKSTLEKYRVLQKVLLLLALIGTCMVIGDGVLTPAISVFSAVSGLELSMSKEQHQYVEVPVACAILVFLFALQHYGTHRIGFLFAPIVITWLLCISAIGVYNIFHWNPHVYQALSPYYMYKFLKKTQRGGWMSLGGILLCITGSEAMFADLGHFSQLSIKIAFTFVVYPSLILAYMGQAAYLSRHHILESDYRIGFYVSVPEKIRWPVLAIAILAAVVGSQAIITGTFSIIKQCSALGCFPRVKIVHTSSKTHGQIYIPEINWTL…
25	474	Dicotyledons	Brassicales	Papaya	Carica papaya	2	CpHAK2	II:b	>Cpapaya|evm.TU.supercontig_1400.1|evm.model.supercontig_1400.1	MDLQPDSSTRESKRKFYRTTLCLAYQSFGVVYGDLSTSPIYVYKSTFSGSLRPYQEDHEIFGVLSLIIWTLTLIPLCKYIIFVLGADDNGEGGTFALYSLLCRHSKMGLLINYNSAHESISSYTSETSTKETRTSLLIKEFFKKYRSSRVVLLLVVLLGTSMVICDGILTPSMSVLSAVYGIQIKVPDLHENYTVFIPACIILVGLFALQHYGTHRIGFLFAPILIAWLLCLAGVGIYNIVCWNHHVVYALSPYYIYKFFQKSGKAGWSCLGGIVLCVTGVEAMFADLGHFSKLSIRIAFTVVVYPCLILAYMGEAAYLSQHKMDLQSSFYKAIPHNIFWPVFIIATLATVVGSQAVISATFSIISQCRALSCFPRVKIIHTSSEIYGQIYIPEVNWML…
25	475	Dicotyledons	Brassicales	Papaya	Carica papaya	3	CpHAK3	II:c	>Cpapaya|evm.TU.supercontig_19.81|evm.model.supercontig_19.81	MDLDYKKCPDSSKKESWKTVLLLAYQSLGVVYGDLGISPLYVYKSTFAEDIQHSETNEEIFGVLSFVFWTLTLVPLFKYVFVVLRADDNGEGGTFALYSLICRHVKVSLLPNRQVADEALSTYKLEHPPETKNSSKVKGYLEKSKFLHTALLILVLLGTCMVIGDGLLTPAISVFSAVSGLELSMSKQHHEYAVIPITCFILACLFALQHYGTHRVGFFFAPIVLMWLLCISALGIYNIIYWNPNVYQALSPYYMFKFLKKTRRSGWMSLGGILLCITGSEAMFADLGHFSYTAIQIAFTFLVYPALILAYMGQAAYLSQHHENRYHIGFYVSVPGMSFYSCLSRLSVMTVMLVTTCLTSLVIILCWHKPPIVALSFLLFFGSIELLYFSASLTKFREG…
25	476	Dicotyledons	Brassicales	Papaya	Carica papaya	4	CpHAK4	II:b	>Cpapaya|evm.TU.supercontig_2.430|evm.model.supercontig_2.430	MNPSQELVEQGISPQNLKRVSCTTVITLAYQSLGVVYGDLSTSPLYAYKTTFSGKLSLHEDDEEIYGVLSFIFWTFTLIALFKYVFIVMSADDNGEGGTFALYSLLCRHAELSILPNQQATDEKLSTYATAGSTDTHQSSALKSFFEKHPRSRKGLLIFVLLGTCMAIGDGVLTPTISVLSAVSGVKIKIPELHENYIVVISCVILVGLFSLQHHGTHRVAFMFAPIVTAWLLCISSIGIYNIIKWNPHVVRALSPAYMLKFLKSTGVEGWVSLGGVVLSITGVETMFADLGHFSSLSIKVAFTFLVYPCLVLAYMGEAAFLSKHHEDIQRSFYKAIPEAVFWPVFIVATFAAVVGSQAVISATFSIISQCCALNCFPRVKIVHTSSKIYGQIYIPEVN…
25	477	Dicotyledons	Brassicales	Papaya	Carica papaya	5	CpHAK5	I:b	>Cpapaya|evm.TU.supercontig_287.3|evm.model.supercontig_287.3	MGAGDCIEEEEDVGSPDHHNNGSKGFDKSISKKTPSRYDSFTDETGSAHHHQRRQASDWGTVLKLAFQSIGIVYGDIGTSPLYALPGIFPDGIKDNEDLLGALSLIFYSIILITLIKYVFIVLAANDNGEGGTFALYSLICRYCKASLMPNHQKEDNEVSNYKLEVPSTGLKRASFVKSMLENTKVAKYTLLFVTLLGTSMVLGDGILTPCISVLSAMGGIKVAAPDMTEDLIVWVSVIILIFLFQLQRFGTDKVGYSFAPILALWFVSIALIGIFNFFKYDPGVIKAINPWYIVRYFARNKKDAWISMGGVILCLTGSEALFADLGHFNVRSIRISSCSLVFPSILFAYFGQISYLRKHNEDVLDTFYKSIPTTLFWPMFIVAVMAAIIASQALISAS…
25	478	Dicotyledons	Brassicales	Papaya	Carica papaya	6	CpHAK6	II:c	>Cpapaya|evm.TU.supercontig_3.361|evm.model.supercontig_3.361	MLQHFGTRKIGSIFAPIVIVWLLFIGGVGTYNIVNCDQKILSAISPVYLYRFFRGVSRLSWRSLSSIILCVAGSEAMFADLGHFSMRSIKSTFIGFIYPVLILCYAGQAAFISTCISRNDVPKHFNGLSTSVPKNFRHVFIVLSLLASAVGSQATITACFSTINQCLALGCFPRVKVVHTSAKIHGQIYIPDINWLLMILSLSVTIGFHDIARIANATGLAIICGMLVTTCLMSLVIALYWEKSVPIASCFLMFFGTIEAMFLSACILNFHRGAWFLVALSALSLIIMVSWHYGTMKKYEFDIQNKVSTEWLTDLSLGLGVSRIPGIGFIYTDIVTGIPAFFSHFITNLPAFHQVLIFVSSKSLPVPFVPPTQRYLIGRVGPKEYRIYRCIVRYGYCDQ…
25	479	Dicotyledons	Brassicales	Papaya	Carica papaya	7	CpHAK7	III	>Cpapaya|evm.TU.supercontig_30.145|evm.model.supercontig_30.145	MESRVEIDEDSETNKGSMWVLDQKLDQPMDEEAGRLRNMYREKKFSVILLLRLAFQSLGVVYGDLGTSPLYVFYNTFPRGVEDPEDVIGALSLIIYSLTLIPLLKYVFIVCKANDSGQGGTFALYSLLCRHAKVKTIPNQHRTDEELTTYSRSTFHEQSFAAKTKRWLERRASRKNALLILVLVGTCMVIGDGILTPAISVLSAAGGIKVDHPGMSNGVVVVVAVVILVGLFSMQHYGTDRVGWLFAPIVLLWFLLIGSIGIFNIWKHDSSVLKAFSPVYIYRYLKRGGRDSWTSLGGIMLSITGTEALFADLAHFPVSAIQIAFTVVVFPCLLLAYSGQAAYIMNNKEHVADAFYRSIPESIYWPMFVVATAAAIVASQATISATFSIIKQALALGCF…
25	480	Dicotyledons	Brassicales	Papaya	Carica papaya	8	CpHAK8	IV	>Cpapaya|evm.TU.supercontig_53.35|evm.model.supercontig_53.35	MGSLVTSPLYVYPSMPLSSPTEADFLGTYSIIFWTLTLIGVVKYVSITLNAHDQGEGGTFALYSLLCRHMDIGILSPKRGISNNSSSPDSLCTTQNKSKLVKFLEGSLLARRVLLFAAILGMCMLVGDSILTPAMSVLSAIEGLRAPFPQVTGDAVKGISAAVLAALFLLQRFGTSRVSFLFSPIMVLWTLCIPLIGIYRIIHHYPSIFKAMSPHYAFLLFARRKKQGWLLLGGTILCITGSEAMFADLGHFDKASIQLAFLCTQYPSLILTYAGQTAYLIKNPNDLGDAFYKFVPKPVYWPMFAVATLAAIVASQSLISATFSVIKQSVVLDYFPRVKVVHTSDRKEGEVYSPEVNYILMILCVFVVVAFGDGKAIGNAYGVVVSMVMLITTVLLTLV…
25	481	Dicotyledons	Brassicales	Papaya	Carica papaya	9	CpHAK9	IV	>Cpapaya|evm.TU.supercontig_53.38|evm.model.supercontig_53.38	MDTDQTSEIRSQSTLTELIVADDAPAPQEESKWGNILLAYKTLGVVMGSLVTSPLYVYSSVPIKSPTEEDFLGLYGIIFWTITLIGVVKYCFVALDADDRGEGGTFALYSLLCRHMDVAILSAKRGGSSSSISSSMNTGNKTTLARFLEGSIVARRLLLFASMLGMCMLIGDSILTPAMSVLSAIEGIRAPFPAVSESMVELISAVVLVVLFLLQRFGTSRVSFLFSPIMGLWTLCIPFIGTYRIIRHYPGIFKALYPLYIIRLFARRGKDGWLMLGGTILCITGTEALFADLGHFNKRSIQTAFLLALYPSLVLTYGGQTAYLIKNPDDIGDAFYKFVPKPVYWPMFVIATLAAIVASQSLISATFSVIKQSVALDYFPRVRVVHTSASKEGEVYCPE…
25	482	Dicotyledons	Brassicales	Papaya	Carica papaya	10	CpHAK10	IV	>Cpapaya|evm.TU.supercontig_53.39|evm.model.supercontig_53.39	MDSHQVSNGRDDSVPLGTNKNQTMTRTTIDSDHVSDTPEALSEVVVHSTAPDRNRLRAAPAPAVQNKKYIKWETILLAYKTIGVVMGSLVTSPLYVYPSMPLSSPTEADFLGTYSIIFWTLTLIGVVKYVSITLNAHDQGEGGTFALYSLLCRHMDIGILSPKRGISNNSSSPDSLCTTQNKSKLVKFLEGSLLARRVLLFAAILGMCMLVGDSILTPAMSVLSAIEGLRAPFPQVTGDAVKGISAAVLAALFLLQRFGTSRVSFLFSPIMVLWTLCIPLIGIYRIIHHYPSIFKAMSPHYAFLLFARRKKQGWLLLGGTILSITGSEAMFADLGHFDKASIQLAFLCTQYPSLILTYAGQTAYLIKNPNDLGDAFYKFVPKPVYWPMFAVATLAAIVA…
25	483	Dicotyledons	Brassicales	Papaya	Carica papaya	11	CpHAK11	V	>Cpapaya|evm.TU.supercontig_69.9|evm.model.supercontig_69.9	MEDEDGIRESSSGTGFVGAGGVGGEGRWVDGSEVDSESPPWSLLDEADSGQVYGTMRRRLMKKPKRVDSLDVEAMEIAGDHGHRSKDLSLWQTLAMAFQTLGVVYGDMGTSPLYVFSDVFSKVGIESEVDVLGTLSLVLYTIALIPLTKYVFVVLKANDNGEGGTFALYSLICRYAKVNLLPNSQPADERISSFKLKLPTPELERALTIKEILESRSSLKTFLLLLVLMGTSMVIGDGILTPAISVMSAVSGLQGQVEGFGTTAVVVTAITVLIVLFSIQQFGTGKVGFMFAPILALWFFSLGSIGLYNLIKYDITVIRALNPAYIYLFFKKNGTEAWSALGGCVLCITGAEAMFADLGHFSVRAIQIAFTCFVFPCLLLAYLGQAAYLMKYPESAARI…
25	484	Dicotyledons	Brassicales	Papaya	Carica papaya	12	CpHAK12	II:a	>Cpapaya|evm.TU.supercontig_70.45|evm.model.supercontig_70.45	MEPESGFSPPRNPPLRQLPLLSWVNLSRNLVLAYQSFGVVYGDLSTSPLYVFSSTFTGKLQKYRNEEVIFGAFSLIFWTLTLLPLLKYVGILLGADDNGEGGVFALYSLLCRHGKFSLLPNQQAADEELSTYKYGPSTDGVLSSSLKRFLEKHKKLRTALLIVVLFGACMVIGDGVLTPAISVLSAVSGLRVTEQKWHNGELLLIACVILVGLFALQHCGTHKVAFMFAPIVIIWLVSMFSVGLYNIICWNPSIIHAVSPHYIIKFFKETGIDGWISLGGILLSVTGTEAMFADLGHFTALSIRLAFTIVIYPCLVIQYMGQAAFLSKNLGSIPNSFFDSIPDSVFWPVFVIATLAAIVGSQAVITATFSIIKQCHALGCFPRVKVVHTSKHIYGQIYI…
25	485	Dicotyledons	Brassicales	Papaya	Carica papaya	13	CpHAK13	III	>Cpapaya|evm.TU.supercontig_875.3|evm.model.supercontig_875.3	MASFENSYASDEKNDVWAWDKQMEAETERLKIVYEEKSLGAIYGDIGTSPLYVFYNTFPDGIDNREDIVGALSLIIYSLILIPLLKYVFIVCRANDNGQGGTFALYSLLSRHANIGIIPSRDQVDEKLTTYSRSRFSENSFAAKTKRWLEGHACAKNALLVLVLVGSCMVIGDGILTPAISELVVLVAVLILIALFSIQHHGIDKVSRLFSPILLTWFLLIGGIGIFNIWKYDSGILKAFSPVYMYRYMKRGGKENFISLGGIMLSITGTEALFVNLSNISVPAIQIAFTAIVFPCLLLAYSGQAAYLVQNSNHVDNSFYHSIPDGFYWPMLVVATTAAVAASQATICATFSLIKQALALGYFPRVKVLHTSNKFHNQIYIPDMNWILMILCVGVTATF…
25	486	Dicotyledons	Brassicales	Papaya	Carica papaya	14	CpHAK14	II:c	>Cpapaya|evm.TU.contig_26967|evm.TU.contig_26967.1	MDLESGVYRDTIKLQKESWKTVLTLAYQSLGVVYGDLSTSPLYVYKSTFDEDIQHSETNEEIFGVLSFVFWTLTLVPLLKYVFIVLKADDNGEGGTFALYSLLCRHARVNSLPNCQSADEDLTEYKKENTGLTPKSSFGSSLKSTLEKHRVLQRVLLVLALIGTCMVIGDGVLTPAISVFSAVSGLELSTEKEHHKYVEVPVACIILIGLFALQHYGTHRVGFLFAPVVLTWLLCIGAIGLYNIIHWNPHVYQALSPHYMYKFLKKTQRGGWMSLGGILLCITGSEAMFADLGHFSQLSIKIAFTSLVYPSLILAYMGQAAYLSQHHEMENDYRIGFYVSVPESLRWPVLVIAILAAVVGSQAIITGTFSIIKQCSALGCFPRVKIVHTSSKIHGQIYI…
26	487	Dicotyledons	Brassicales	thale cress	Arabidopsis thaliana	1	AtHAK5	I:a	At4g13420	MDGEEHQIDGDEVNNHENKLNEKKKSWGKLYRPDSFIIEAGQTPTNTGRRSLMSWRTTMSLAFQSLGVVYGDIGTSPLYVYASTFTDGINDKDDVVGVLSLIIYTITLVALLKYVFIVLQANDNGEGGTFALYSLICRYAKMGLIPNQEPEDVELSNYTLELPTTQLRRAHMIKEKLENSKFAKIILFLVTIMGTSMVIGDGILTPSISVLSAVSGIKSLGQNTVVGVSVAILIVLFAFQRFGTDKVGFSFAPIILVWFTFLIGIGLFNLFKHDITVLKALNPLYIIYYFRRTGRQGWISLGGVFLCITGTEAMFADLGHFSVRAVQISFSCVAYPALVTIYCGQAAYLTKHTYNVSNTFYDSIPDPLYWPTFVVAVAASIIASQAMISGAFSVISQSL…
26	488	Dicotyledons	Brassicales	thale cress	Arabidopsis thaliana	2	AtKUP1/AtKT1	II:b	At2g30070	MNQSPSLIEQGISQQHLKTLSCANVLTLAYQSLGVIYGDLSTSPLYVYKTTFSGKLSLHEDDEEIFGVFSFIFWTFTLIALFKYVFIVLSADDNGEGGTFALYSLLCRYAKLSILPNHQEMDEKLSTYATGSPGETRQSAAVKSFFEKHPKSQKCLLLFVLLGTCMAIGDSVLTPTISVLSAVSGVKLKIPNLHENYVVIIACIILVAIFSVQRYGTHRVAFIFAPISTAWLLSISSIGVYNTIKWNPRIVSALSPVYMYKFLRSTGVEGWVSLGGVVLSITGVETMFADLGHFSSLSIKVAFSFFVYPCLILAYMGEAAFLSKHHEDIQQSFYKAIPEPVFWPVFIVATFAAVVGSQAVISATFSIISQCCALDCFPRVKIIHTSSKIHGQIYIPEVN…
26	489	Dicotyledons	Brassicales	thale cress	Arabidopsis thaliana	3	AtKUP2/AtKT2	II:c	At2g40540	MDLNLGKCCGSRSSKKESWRSVLLLAYQSLGVVYGDLSISPLYVFKSTFAEDIQHSETNEEIYGVMSFVFWTLTLVPLLKYVFIVLRADDNGEGGTFALYSLICRHVKVSLLPNRQVSDEALSTYKLEHPPEKNHDSCVKRYLEKHKWLHTALLLLVLLGTCMVIGDGLLTPAISVFSAVSGLELNMSKEHHQYAVIPITCFILVCLFSLQHFGTHRVGFVFAPIVLTWLLCISGIGLYNIIQWNPHIYKALSPTYMFMFLRKTRVSGWMSLGGILLCITGAEAMFADLGHFNYAAIQIAFTFLVYPALILAYMGQAAYLSRHHHSAHAIGFYVSVPKCLHWPVLAVAILASVVGSQAIISGTFSIINQSQSLGCFPRVKVIHTSDKMHGQIYIPEINW…
26	490	Dicotyledons	Brassicales	thale cress	Arabidopsis thaliana	4	AtKUP3/AtKT4	II:a	At3g02050	MAPAESGVSPRRNPSQLSWMNLSSNLILAYQSFGVVYGDLSTSPLYVFPSTFIGKLHKHHNEDAVFGAFSLIFWTLTLIPLLKYLLVLLSADDNGEGGTFALYSLLCRHAKLSLLPNQQAADEELSAYKFGPSTDTVTSSPFRTFLEKHKRLRTALLLVVLFGAAMVIGDGVLTPALSVLSSLSGLQATEKNVTDGELLVLACVILVGLFALQHCGTHRVAFMFAPIVIIWLISIFFIGLYNIIRWNPKIIHAVSPLYIIKFFRVTGQDGWISLGGVLLSVTGTEAMFANLGHFTSVSIRVAFAVVVYPCLVVQYMGQAAFLSKNLGSIPNSFYDSVPDPVFWPVFVIATLAAIVGSQAVITTTFSIIKQCHALGCFPRIKVVHTSKHIYGQIYIPEIN…
26	491	Dicotyledons	Brassicales	thale cress	Arabidopsis thaliana	5	AtKUP4/AtTRH1/AtKT3	II:a	At4g23640	MADRRNRCNQILLLAYQSFGLVFGDLSISPLYVYKCTFYGGLRHHQTEDTIFGAFSLIFWTITLLSLIKYMVFVLSADDNGEGGIFALYALLCRHARFSLLPNQQAADEEISTYYGPGDASRNLPSSAFKSLIERNKRSKTALLVLVLVGTSMVITIGVLTPAISVSSSIDGLVAKTSLKHSTVVMIACALLVGLFVLQHRGTNKVAFLFAPIMILWLLIIATAGVYNIVTWNPSVYKALSPYYIYVFFRDTGIDGWLSLGGILLCITGTEAIFAELGQFTATSIRFAFCCVVYPCLVLQYMGQAAFLSKNFSALPSSFYSSIPDPFFWPVLMMAMLAAMVASQAVIFATFSIVKQCYALGCFPRVKIVHKPRWVLGQIYIPEINWVVMILTLAVTICF…
26	492	Dicotyledons	Brassicales	thale cress	Arabidopsis thaliana	6	AtKUP5/AtKT5	V	At4g33530	MFHVEEESSGGDGSEIDEEFGGDDSTTSLSRWVFDEKDDYEVNEDYDDDGYDEHNHPEMDSDEEDDNVEQRLIRTSPAVDSFDVDALEIPGTQKNEIEDTGIGKKLILALQTLGVVFGDIGTSPLYTFTVMFRRSPINDKEDIIGALSLVIYTLILIPLVKYVHFVLWANDDGEGGTFALYSLICRHANVSLIPNQLPSDARISGFGLKVPSPELERSLIIKERLEASMALKKLLLILVLAGTAMVIADAVVTPAMSVMSAIGGLKVGVGVIEQDQVVVISVSFLVILFSVQKYGTSKLGLVLGPALLLWFFCLAGIGIYNLVKYDSSVFKAFNPAYIYFFFKRNSVNAWYALGGCVLCATGSEAMFADLSYFSVHSIQLTFILLVLPCLLLGYLGQAA…
26	493	Dicotyledons	Brassicales	thale cress	Arabidopsis thaliana	7	AtKUP6/AtHAK6/AtKT6	II:c	At1g70300	MEIESGSYQNAKKESWRTVLTLAYQSLGVVYGDLSISPLYVYKSTFAEDIHHSESNEEIFGVLSFIFWTITLVPLLKYVFIVLRADDNGEGGTFALYSLLCRHARVNSLPSCQLADEQLIEYKTDSIGSSSMPQSGFAASLKSTLEKHGVLQKILLVLALIGTCMVIGDGVLTPAISVFSAVSGVELSMSKEHHKYIELPAACVILIGLFALQHYGTHRVGFLFAPVILLWLMCISAIGVYNIFHWNPHVYQALSPYYMYKFLKKTQSRGWMSLGGILLCITGSEAMFADLGHFSQLSIKIAFTSLVYPSLILAYMGQAAYLSQHHIIESEYNIGFYVSVPERLRWPVLVIAILAAVVGSQAIITGTFSIIKQCSALGCFPKVKIVHTSSKIHGQIYIP…
26	494	Dicotyledons	Brassicales	thale cress	Arabidopsis thaliana	8	AtKUP7/AtHAK7/AtKT7	V	At5g09400	MAEESSMEGSEKEEIDSSGGGFGDMASMDSIESRWVIQDDDDSEIGVDDDNDGFDGTGLESDEDEIPEHRLIRTGPRVDSFDVEALEVPGAPRNDYEDLTVGRKVLLAFQTLGVVFGDVGTSPLYTFSVMFSKSPVQEKEDVIGALSLVLYTLLLVPLIKYVLVVLWANDDGEGGTFALYSLISRHAKISLIPNQLRSDTRISSFRLKVPCPELERSLKLKEKLENSLILKKILLVLVLAGTSMVIADGVVTPAMSVMSAVGGLKVGVDVVEQDQVVMISVAFLVILFSLQKYGTSKMGLVVGPALLIWFCSLAGIGIYNLIKYDSSVYRAFNPVHIYYFFKRNSINAWYALGGCILCATGSEALFADLCYFSVRSVQLTFVCLVLPCLMLGYMGQAAY…
26	495	Dicotyledons	Brassicales	thale cress	Arabidopsis thaliana	9	AtKUP8/AtHAK8/AtKT8	II:c	At5g14880	MDLERLSPRNPVKKESWWTVLTLAYQSLGVVYGDLATSPLYVYKSTFAEDITHSETNEEIFGVLSLIFWTLTLIPLVKYVFIVLRADDNGEGGTFALYSLLCRHARISSLPNFQLADEDLSEYKKNSGENPMRLKVPGWSLKNTLEKHKFLQNMLLVLALIGTCMVIGDGVLTPAISVFSAVSGLELSMSKQQHQYVEVPVVCAILILLFSLQHYGTHRLGFVFAPIVLAWLLCISTIGVYNIFHWNPHVYKALSPYYIYKFLKKTRKRGWMSLGGILLCITGSEAMFADLGHFTQLSIQIAFTFAVYPSLILAYMGQAAYLSKHHVLQSDYRIGFYVSVPEQIRWPVLAIAILAAVVGSQAIITGTFSIIKQCTSLGCFPKVKIVHTSSRMHGQIYIP…
26	496	Dicotyledons	Brassicales	thale cress	Arabidopsis thaliana	10	AtKUP9/AtHAK9/AtKT9	III	At4g19960	MAERVEASSVPEGENTIEEREVGAMWELEQKLDQPMDEEANKLNNMYREKGLSMLMLLRLSFQSLGIVYGDLGTSPLYVFYNTFPDGIDDSEDVIGALSLIIYSLLLIPLIKYVFIVCKANDNGQGGTLAIYSLLCRHAKVKLIPNQHRSDEDLTTYSRTVSAEGSFAAKTKKWLEGKEWRKRALLVVVLLGTCMMIGDGILTPAISVLSATGGIKVNNPKMSGDIVVLVAIVILIGLFSMQHYGTDKVGWLFAPIVLIWFLFIGATGMYNICKYDTSVLKAFSPTYIYLYFKRRGRDGWISLGGILLSITGTEALYADIAYFPLLAIQLAFTFFVFPCLLLAYCGQAAYLVIHKEHYQDAFYASIPDSVYWPMFIVATGAAIVGSQATISGTYSIVKQ…
26	497	Dicotyledons	Brassicales	thale cress	Arabidopsis thaliana	11	AtKUP10/AtHAK10/AtKT10	III	At1g31120	MAGRVESSIGGGEIDEEGDERGSMWDLDQSLDQPMDEEAGRLRNMYREKKFSAFLLLQLSFQSLGVVYGDLGTSPLYVFYNTFPRGIKDPEDIIGALSLIIYSLTLIPLLKYVFVVCKANDNGQGGTFALYSLLCRHAKVSTIPNQHRTDEELTTYSRTTFHERSFAAKTKRWLENGTSRKNALLILVLVGTCMVIGDGILTPAISVLSAAGGLRVNLPHINNGIVVVVAVVILVSLFSVQHYGTDRVGWLFAPIVFLWFLFIASIGMFNIWKHDPSVLKAFSPVYIFRYFKRGGQDRWTSLGGIMLSITGIEALFADLSHFPVSAVQFAFTVIVFPCLLLAYSGQAAYLRKYPHHVEDAFYQSIPKRVYWPMFIIATAAAIVASQATISATFSLIKQA…
26	498	Dicotyledons	Brassicales	thale cress	Arabidopsis thaliana	12	AtKUP11/AtHAK11/AtKT11	III	At2g35060	MAARVEAATMGGEIDEEESDERGSMWDLDQKLDQSMDEEAGRLRNMYREKKFSALLLLQLSFQSLGVVYGDLGTSPLYVFYNTFPHGIKDPEDIIGALSLIIYSLTLIPLLKYVFVVCKANDNGQGGTFALYSLLCRHAKVKTIQNQHRTDEELTTYSRTTFHEHSFAAKTKRWLEKRTSRKTALLILVLVGTCMVIGDGILTPAISVLSAAGGLRVNLPHISNGVVVFVAVVILVSLFSVQHYGTDRVGWLFAPIVFLWFLSIASIGMYNIWKHDTSVLKAFSPVYIYRYFKRGGRDRWTSLGGIMLSITGIEALFADLSHFPVSAVQIAFTVIVFPCLLLAYSGQAAYIRRYPDHVADAFYRSIPGSVYWPMFIIATAAAIVASQATISATFSLVKQ…
26	499	Dicotyledons	Brassicales	thale cress	Arabidopsis thaliana	13	AtKUP12/AtHAK12/AtKT12	V	At1g60160	MEEIEEGSSNNSIRRVGTGSSDRRWVDGSEVDSETPLFSEIRDRDYSFGNLRRRLMKKPKRADSLDVEAMEIAGSHGHNLKDLSLLTTLGIAFQTLGVVYGDMGTSPLYVFSDVFSKVPIRSEVDVLGALSLVIYTIAVIPLAKYVFVVLKANDNGEGGTFALYSLICRYAKVNKLPNQQPADEQISSFRLKLPTPELERALGIKEALETKGYLKTLLLLLVLMGTSMIIGDGILTPAMSVMSAMSGLQGEVKGFGTNALVMSSIVILVALFSIQRFGTGKVGFLFAPVLALWFFSLGAIGIYNLLKYDFTVIRALNPFYIVLFFNKNSKQAWSALGGCVLCITGAEAMFADLGHFSVRSIQMAFTCVVFPCLLLAYMGQAAYLTKHPEASARIFYDSV…
27	500	Dicotyledons	Brassicales		Arabidopsis halleri	1	AhHAK1	III	>Araha.0321s0003 peptide: Araha.0321s0003.1.p (PAC:28847540)	MAERVEASVTEGENTIEEREVGAMWELEQKLDQPMDEEANKLNNMYTEKGLSMLMLLRLSFQSLGIVYGDLGTSPLYVFYNTFPDGIDDSEDVIGALSLIIYSLLLIPLIKYVFIVCKANDNGQGGTLAIYSLLCRHAKVKLIPNQHRSDEDLTTYSRTVSAEGSFAAKTKKWLEGKDWRKRALLVVVLLGTCMMIGDGILTPAISVLSATGGIKIIKPNMSGDIVVLVSIVILIGLFSLQHYGTDKVGWLFAPIVLIWFLFIGATGIYNICKYDTSVLKAFSPTYIYLYFKRRGLDGWISLGGILLSITGTEALYADIAYFPLLAIQLAFTLFVFPCLLLAYCGQAAYLVNHKEHYQDAFYASIPNSVYWPMFVVATGAAIVGSQATISGTYSIIKQA…
27	501	Dicotyledons	Brassicales		Arabidopsis halleri	2	AhHAK2	V	>Araha.13692s0021 peptide: Araha.13692s0021.1.p (PAC:28846701)	MAEESSLEGSEKEEIDSSGGGLGDMASMDSIESRWVIQDDDDSEIGVDDDNDGFDGTGLESDEDEIPEHRLIRTGPRVDSFDVEALEVPGAPRNDYEDLTVGRKVLLAFQTLGVVFGDVGTSPLYTFSVMFSKSPVQGKEDVIGALSLVLYTLLLVPLIKYVLVVLWANDDGEGGTFALYSLISRHAKISLIPNQLRSDTRISSFRLKVPCPELERSLKLKEKLENSLILKKILLVLVLAGTSMVIADGVVTPAMSVMSAVGGLKVGVDVVEQDQVVMISVAFLVILFSLQKYGTSKMGLVVGPALLIWFCCLAGIGIYNLIKYDSSVFKAFNPVHIYYFFKRNSINAWYALGGCILCATGSEALFADLCYFSVRSVQLTFVCLVLPCLMLGYMGQAAY…
27	502	Dicotyledons	Brassicales		Arabidopsis halleri	3	AhHAK3	III	>Araha.1615s0019 peptide: Araha.1615s0019.1.p (PAC:28838395)	MAARVEAATMGGEIDEEESDERGSMWDLDQKLDQSMDEEAGRLRNMYREKKFSALLLLQLSFQSLGVVYGDLGTSPLYVFYNTFPHGIKDQEDIIGALSLIIYSLTLIPLLKYVFVVCKANDNGQGGTFALYSLLCRHAKVKTIQNQHRTDEELTTYSRTTFHEHSFAAKTKRWLEKRTSRKTALLILVLVGTCMVIGDGILTPAISVLSAAGGLRVNLPHISNGVVVFVAVVILVSLFSVQHYGTDRVGWLFAPIVFLWFLSIASIGIYNIWKHDTSVLKAFSPVYIYRYFKRGGRDRWTSLGGIMLSITGIEALFADLSHFPVSAVQIAFTVIVFPCLLLAYSGQAAYIRRYPDHVADAFYRSIPGSVYWPMFIIATAAAIVASQATISATFSLVKQ…
27	503	Dicotyledons	Brassicales		Arabidopsis halleri	4	AhHAK4	II:b	>Araha.17827s0001 peptide: Araha.17827s0001.1.p (PAC:28861842)	FLLCTKKHTTPFLSFLTSLFLLLLLLPNFSPLSSHYYILSVSSNPISLLLTKLKYSSFAYTAMNQSPSLIEQGISQQHLKTVSCANVLTLAYQSLGVIYGDLSTSPLYVYKTTFSGKLSLHENDEEIFGVFSFIFWTFTLIALFKYVFIVLSADDNGEGGTFALYSLLCRYAKLRILPNHQEMDEKLSTYATGSPGETRQSAAVKSFFEKHPKSQKCLLLFVLLGTCMAIGDSVLTPTISVLSAVSGVKLKIPNLHENYVVIIACIILVAIFSVQRYGTHRVAFIFAPISTAWLLSISSIGVYNTIKWNPRIVSALSPVYMYKFLRSTGVEGWVSLGGVVLSITGVETMFADLGHFSSLSIKVAFSFFVYPCLILAYMGEAAFLSKHHEDIQQSFYKAI…
27	504	Dicotyledons	Brassicales		Arabidopsis halleri	5	AhHAK5	I:a	>Araha.20031s0002 peptide: Araha.20031s0002.1.p (PAC:28839557)	MDGEEQQIDGDEVNNHENKLNEKKKSWGKLYRPDSFSIEAGQTPTNTGRPSLMSWKTTMSLAFQSLGVVYGDIGTSPLYVYASTFTEGINDKNDVIGVLSLIIYTITLVALLKYVFIVLQANDNGEGGTFALYSLICRYAKMGLIPNQEPEDTELSNYTLELPTTQLKRAHMIKEKLESSKFAKIILFLVTIMGTSMVIGDGILTPSISVLSAVSGIKSLGQDTVVGVSVAILIVLFAFQRFGTDKVGFSFAPIILIWFTFLTGIGLFNLFKHDITVLKALNPLYIIYYFRRTGRKGWISLGGVFLCITGTEAMFADLGHFSVRAVQISFSCVAYPALVTIYCGQAAYLTKHTSNVSNTFYASIPDPLYWPTFVVAVAASIIASQAMISGAFSVISQSL…
27	505	Dicotyledons	Brassicales		Arabidopsis halleri	6	AhHAK6	II:c	>Araha.2471s0001 peptide: Araha.2471s0001.1.p (PAC:28847596)	MDLERLSPRNPIKKESWWTVLTLAYQSLGVVYGDLATSPLYVYKSTFAEDITHSETNEEIFGVLSLIFWTLTLIPLVKYVFIVLRADDNGEGGTFALYSLLCRHARISSLPNCQLADEDLSEYKKTSGENPMRLKVPGWSLKNTLEKHKFLQNMLLVLALIGTCMVIGDGVLTPAISVFSAVSGLELSMSKQQHQYVEVPVVCAILILLFSLQHYGTHRLGFVFAPIVLAWLLCISTIGVYNIFHWNPHVYKALSPYYIYKFLKKTRKHGWMSLGGILLCITGSEAMFADLGHFTQLSIQIAFTFAVYPSLILAYMGQAAYLSKHHVLESDYRIGFYVSVPEQIRWPVLAIAILAAVVGSQAIITGTFSIIKQCTSLGCFPKVKIVHTSSRMHGQIYIP…
27	506	Dicotyledons	Brassicales		Arabidopsis halleri	7	AhHAK7	V	>Araha.25866s0004 peptide: Araha.25866s0004.1.p (PAC:28855684)	ISSFRLKLPTPELERALWIKEALETKGYLKTLLLLLVLMGTSMIIGDGILTPAMSVMSAMSGLQGEVKGFGTNALVMFSIVILVALFSIQGFGTGKVGFLFAPVLALWFFSLGAIGIYNLLKYDITVIRALNPFYIVLFFNKNSKQAWSALGGCVLCITGAEAMFADLGHFSVRSIQMAFTCVVFPCLLLAYMGQAAYLTKHPEASARIFYDSVPKSLFWPVFVIATLAAMIASQAMISATFSCVKQAMALGCFPRLKIIHTSKKRMGQIYIPVINWFLMIMCILVVSIFRSTTHIANAYGIAEVGVMMVSTVLVTLVMLLIWQTNIFLALCFPLIFGSVETIYLLAVLTKILEGGWVPLVFATFFLTVMYIWNYGSVLKYQSEVRERISMDFMRELGS…
27	507	Dicotyledons	Brassicales		Arabidopsis halleri	8	AhHAK8	II:a	>Araha.27173s0004 peptide: Araha.27173s0004.1.p (PAC:28837478)	MAAAESGVSPRRNPSQLSWMNLSSNLILAYQSFGVVYGDLSTSPLYVFPCTFIGKLHKHHNEEAVFGAFSLIFWTLTLFPLLKYLLVLLSADDNGEGGTFALYSLLCRHAKLSLLPNQQAADEELSAYKFGPSTDTATSSPFRRFLEMHKRLRTALLLLVLFGAAMVIGDGVLTPAISVLSSMSGLQATDKKLTDGELLVLACVILVGLFALQHCGTHRVAFMFAPIVIIWLISILFIGLYNILHWNPTIIHAISPLYIIKFFRVTGQDGWISLGGILLSVTGTEAIFANLGHFTSVSIRLAFAVVVYPCLVVQYMGQAAFLSKNLGSIPNSFYDSVPDPVFWPVFVIATLAAIVGSQAVITATFSIVKQCHALGCFPRIKVVHTWKHIYGQIYIPEIN…
27	508	Dicotyledons	Brassicales		Arabidopsis halleri	9	AhHAK9	II:c	>Araha.29402s0001 peptide: Araha.29402s0001.1.p (PAC:28861785)	MEIESGSYQNIAKKESWRTVLTLAYQSLGVVYGDLSISPLYVYKSTFAEDIRHSESNEEIFGVLSFIFWTITLVPLLKYVFIVLRADDNGEGGTFALYSLLCRHARVNSLPSCQLADEQLIEYKTDSIGSSSLMPQTGFAASLKSTLEKHGVLQKILLVLALIGTCMVIGDGVLTPAISVFSAVSGVELSMSKEHHKYIELPAACIILIGLFALQHYGTHRVGFLFAPVILLWLMCISAIGVYNIFHWNPHIYQALSPYYMYKFLKKTQSKGWMSLGGILLCITGSEAMFADLGHFSQLSIKIAFTSLVYPSLILAYMGQAAYLSQHHVIESEYNIGFYVSVPEKLRWPVLVIAILAAVVGSQAIITGTFSIIKQCSALGCFPKVKIVHTSSKIHGQIY…
27	509	Dicotyledons	Brassicales		Arabidopsis halleri	10	AhHAK10	V	>Araha.30680s0009 peptide: Araha.30680s0009.1.p (PAC:28861855)	MFHVEEGSSGGDGSEIDEEFGGDDSTTSLSRWVFDEKDDYEVNEDYDDDGYDEHNHAEMDSDEEDGNVEQRLIRTSPAVDSFDVDALEIPGTQKNEIEDTGIGKKLILALQTLGVVFGDIGTSPLYTFTVMFRRSPINDKDDIIGALSLVIYTLILIPLVKYVHFVLWANDDGEGGTFALYSLICRHANVSLIPNQLPSDARISGFGLKVPSPELERSLIIKERLEASMALKKLLLILVLAGTAMVIADAVVTPAMSVMSAIGGLKVGVGVIEQDQVVVISISFLVILFSVQKYGTSKLGLVLAGIGIYNLVKYDSSVFKAFNPAYIYFFFKRNSVNAWYALGGCVLCATGSEAMFADLSYFSVHSVQLTFTLLVLPCLLLGYLGQAAYLSENFSDAGD…
27	510	Dicotyledons	Brassicales		Arabidopsis halleri	11	AhHAK11	II:c	>Araha.37351s0001 peptide: Araha.37351s0001.1.p (PAC:28849469)	MDLNLGKCCGSRSSKKESWRSVLLLAYQSLGVVYGDLSISPLYVFKSTFAEDIQHSETNEEIYGVMSFVFWTLTLVPLLKYVFIVLRADDNGEGGTFALYSLICRHVKVSLLPNRQVSDEALSTYKLEHPPEKNHDSCVKRYLEKHKWLHTALLLLVLLGTCMVIGDGLLTPAISVFSAVSGLELNMSKEHHQYAVIPITCFILVCLFSLQHFGTHRVGFVFAPIVLTWLLCISGIGLYNIIQWNPHIYKALSPTYMFMFLRKTRVSGWMSLGGILLCITGAEAMFADLGHFNYAAIQIAFTFLVYPALILAYMGQAAYLSRHHHSAHAIGFYVSVPKCLHWPVLAVAILASVVGSQAIISGTFSIINQSQSLGCFPRVKVIHTSDKIHGQIYIPEINW…
27	511	Dicotyledons	Brassicales		Arabidopsis halleri	12	AhHAK12	III	>Araha.48361s0001 peptide: Araha.48361s0001.1.p (PAC:28846323)	MAARVESSIGGGEIDEEGDERGSMWDLDQSLDQPMDEEAGRLRNMYREKKFSAFLLLQLSFQSLGVVYGDLGTSPLYVFYNTFPRGIKDPEDIIGALSLIIYSLTLIPLLKYVFVVCKANDNGQGGTFALYSLLCRHAKVSTIPNQHRTDEELTTYSRTTFHEHSFAAQTKRWLEKGTSRKNALLILVLVGTCMVIGDGILTPAISVLSAAGGLRVNLPHINNGIVVVVAVVILVSLFSVQHYGTDRVGWLFAPIVFLWFLFIASIGMFNIWKHDPSVLKAFSPVYIYRYFKRGGQDRWTSLGGIMLSITGIEALFADLSHFPVSAVQFAFTVIVFPCLLLAYSGQAAYLRKYPHHVEDAFYQSIPKRVYWPMFIIATAAAIVASQATISATFSLIKQA…
27	512	Dicotyledons	Brassicales		Arabidopsis halleri	13	AhHAK13	II:a	>Araha.5498s0025 peptide: Araha.5498s0025.1.p (PAC:28844990)	MADRRNRCNQILLLAYQSFGLVFGDLSISPLYVYKCTFYGGLKHHQTEDTIFGAFSLIFWTITLLSLIKYMVFVLSADDNGEGGIFALYALLCRHARFSLLPNQQAADEEISTYYGPGDASRNLPGSAFKSLIERNKRSKTALLVLVLVGTSMVITIGVLTPAISVSSSIDGLVAKTSLKHSTVVMIACALLVGLFVLQHRGTNKVAFLFAPIMILWLLIIATVGVYNIVTWNPSVYKALSPYYIYVFFRDTGIDGWLSLGGILLCITGTEAIFAELGQFTATSIRFAFCCVVYPCLVLQYMGQAAFLSKNFSALPSSFYSSIPDPFFWPVLMMAMLAAMVASQAVIFATFSIVKQCYALGCFPRVKIVHKPRWVLGQIYIPEINWVVMILTLTVTICF…
27	513	Dicotyledons	Brassicales		Arabidopsis halleri	14	AhHAK14	I:a	>Araha.8233s0001 peptide: Araha.8233s0001.1.p (PAC:28854340)	PISHLSQLSQKKKTNKNMDGEEPQIDGEANNHENKLNGKKKSWGKLFRPDSFSIEAGQTSTNIGRPSLMSWRTTISLAFQSLGVVYGDIGTSPLYVYASTFTKGINDKDDVIGVLSLIIYTITLVALLKYVFIVLQANDNGEGGTFALYSLICRYAKMGLIPNQEPEDRELSNYALELPTTQLRRAHMIKEKLENSKFAKIILFLVTIMGTSMVIGDGILTPSISVLSAVSGIKSLGQDTVVGVSVAILIILFAFQRFGTDKVGFSFAPIILLWFAVLTGIGLFNLFKHDITVLKALNPLYIIYYFRRTGRDGWISLGGVFLCITGTEAMFADLGHFSVRAVQISFSCVAYPALVTIYCGQAAYLTKHTSKVSNTFYDSIPDPIYWPTFVLAVAASIIA…
28	514	Dicotyledons	Brassicales		Arabidopsis lyrata	1	AlyHAK1	III	>Alyrata|482472|482472	MAARVEAATMGGEIGEEETDERGSMWDLDQKLDQSMDEEAGRLRNMYREKKFSALLLLQLSFQSLGVVYGDLGTSPLYVFYNTFPHGINDPEDIIGALSLIIYSLTLIPLLKYVFVVCKANDNGQGSGTFALYSLLCRHAKVKTIQNQHRTDEELTTYSRTTFHEHSFAAKTKRWLEKRTSRKTALLILVLVGTCMVIGDGILTPAISVLSAAGGLRVNRPHISNGVVVFVAVVILVSLFSVQHYGTDRVGWLFAPIVFLWFLSIASIGIYNIWKHDTSVLKAFSPVYIYRYFKRGGRDRWTSLGGIMLSITGIEALFADLSHFPVSAVQIAFTVIVFPCLLLAYSGQAAYIRIYPDHVADAFYRSIPGSVYWPMFIIATAAAIVASQATISATFSLVK…
28	515	Dicotyledons	Brassicales		Arabidopsis lyrata	2	AlyHAK2	II:c	>Alyrata|483110|483110	MDLNLGKCCGSRSSKKESWRSVLLLAYQSLGVVYGDLSISPLYVFKSTFAEDIQHSETNEEIYGVMSFVFWTLTLVPLLKYVFIVLRADDNGEGGTFALYSLICRHVKVSLLPNRQVSDEALSTYKLEHPPEKNHDSCVKRYLEKHNWLHTALLLLVLLGTCMVIGDGLLTPAISVFSAVSGLELNMSKEHHQYAVIPITCFILVCLFSLQHFGTHRVGFVFAPIVLTWLLCISGIGLYNIIQWNPHIYKALSPTYMFMFLRKTRVSGWMSLGGILLCITGAEAMFADLGHFNYAAIQIAFTFLVYPALILAYMGQAAYLSRHHHSAHAIGFYVSVPKCLHWPVLAVAILASVVGSQAIISGTFSIINQSQSLGCFPRVKVIHTSDKIHGQIYIPEINW…
28	516	Dicotyledons	Brassicales		Arabidopsis lyrata	3	AlyHAK3	II:c	>Alyrata|325951|325951	MDLERLSPRNPIKKESWWTVLTLAYQSLGVVYGDLATSPLYVYKSTFAEDITHSETNEEIFGVLSLIFWTLTLIPLVKYVFIVLRADDNGEGGTFALYSLLCRHARISSLPNFQLADEDLSEYKKTSGENLRSLKVPGWSLKNTLEKHKFLQNMLLVLALIGTCMVIGDGVLTPAISVFSAVSGLELSMSKQQHQYVEVPVVCAILILLFSLQHYGTHRLGFVFAPIVLAWLLCISTIGVYNIFHWNPQVYKALSPYYIYKFLKKTRKRGWMSLGGILLCITGSEAMFADLGHFTQLSIQIAFTFAVYPSLILAYMGQAAYLSKHHVLESDYRIGFYVSVPEQIRWPVLAIAILAAVVGSQAIITGTFSIIKQCTSLGCFPKVKIVHTSSRMHGQIYIP…
28	517	Dicotyledons	Brassicales		Arabidopsis lyrata	4	AlyHAK4	V	>Alyrata|325492|325492	MAEESSLEGSEKEEIDSSGGGLGDMASMDSIESRWVIQDDDDSEIGVDDDNDGFDGTGLESDEDEIPEHRLIRTGPRVDSFDVEALEVPGAPRNDYEDLTVGRKVLLAFQTLGVVFGDVGTSPLYTFSVMFSKSPVQGKEDVIGALSLVLYTLLLVPLIKYVLVVLWANDDGEGGTFALYSLISRHAKISLIPNQLRSDTRISSFRLKVPCPELERSLKLKEKLENSLILKKILLVLVLAGTSMVIADGVVTPAMSGGFYYHMDLSELLDLHNAVMSAVGGLKVGVDVVEQAFSCFFFADQVVMISVAFLVILFSLQKYGTSKMGLVVGPALLIWFCCLAGIGIYNLIKYDSSVFRAFNPVHIYYFFKRNSINAWYALGGCILCATGSEALFADLCYFS…
28	518	Dicotyledons	Brassicales		Arabidopsis lyrata	5	AlyHAK5	III	>Alyrata|492879|492879	MAERVEASVTEGENTIEEREVGAMWELEQKLDQPMDEEANKLNNMYSREKGLSMLMLLRLSFQSLGIVYGDLGTSPLYVFYNTFPDGIDDSEDVIGALSLIIYSLLLIPLIKYVFIVCKANDNGQGGTLAIYSLLCRHAKVKLIPNQHRSDEDLTTYSRTVSAEGSFAAKTKKWLEGKDWRKRALLVIVLLGTCMMIGDGILTPAISVLSATGGIKVIKPNMSGDIVVLVSIVILVGLFSMQHYGTDKVGWLFAPIVLIWFLFIGATGLYNICKHDTSVLRAFSPTYIYLYFKRRGLDGWISLGGILLSITGTEALYADIAYFPLLAIQLAFTFFVFPCLLLAYCGQAAYLVNHKEHYQDAFYASIPNSVYWPMFVVATGAAIVGSQATISGTYSIIKQ…
28	519	Dicotyledons	Brassicales		Arabidopsis lyrata	6	AlyHAK6	II:b	>Alyrata|481917|481917	MNQSPSLIEQGISQQHLKTVSCANVLTLAYQSLGVIYGDLSTSPLYVYKTTFSGKLSLHENDEEIFGVFSFIFWTFTLIALFKYVFVVLSADDNGEGGTFALYSLLCRYAKLRILPNHQEMDEKLSTYAMGSPGETRQSAAVKSFFEKHPKSQKCLLLFVLLGTCMAIGDSVLTPTISVLSAVSGVKLKIPNLHENYVVIIACIILVAIFSVQRYGTHRVAFIFAPISTAWLLSISSIGVYNTIKWNPRIVSALSPVYMYKFLRSTGVEGWVSLGGVVLSITGVETMFADLGHFSSLSIKVAFSFFVYPCLILAYMGEAAFLSKHHEDIQQSFYKAIPEPVFWPVFIVATFAAVVGSQAVISATFSIISQCCALDCFPRVKVIHTSSKIHGQIYIPEVN…
28	520	Dicotyledons	Brassicales		Arabidopsis lyrata	7	AlyHAK7	II:c	>Alyrata|926343|926343	MEIESGSYQNIAKKESWRTVLTLAYQSLGVVYGDLSISPLYVYKSTFAEDIHHSESNEEIFGVLSFIFWTITLVPLLKYVFIVLRADDNGEGGTFALYSLLCRHARVNSLPSCQLADEQLIEYKTDSIGSSSSMPQSGFAASLKSTLEKHGVLQKILLVLALIGTCMVIGDGVLTPAISVFSAVSGVELSMSKEHHKYIELPAACIILIGLFALQHYGTHRVGFLFAPVILLWLMCISAIGVYNIFHWNPHVYQALSPYYMYKFLKKTQSKGWMSLGGILLCITGSEAMFADLGHFSQLSIKIAFTSLVYPSLILAYMGQAAYLSQHHVIESEYNIGFYVSVPEKLRWPVLVIAILAAVVGSQAIITGTFSIIKQCSALGCFPKVKIVHTSSKIHGQIY…
28	521	Dicotyledons	Brassicales		Arabidopsis lyrata	8	AlyHAK8	I:a	>Alyrata|915045|915045	MDGEEQQIDGDEVNNHENKLNEKKKSWGKLYRPDSFSIEAGQTPTNTGRPSLMSWTTTMSLAFQSLGVVYGDIGTSPLYVYASTFTEGINDKNDVIGVLSLIIYTITLVALLKYVFIVLQANDNGEGGTFALYSLICRYAKMGLIPNQEPEDTELSNYTLQLPTTQLKRAHMIKEKLESSKFAKIILFLVTIMGTSMVIGDGILTPSISVLSAVSGIKSLGQDTVVGVSVAILIVLFAFQQFGTDKVGFSFAPIILVWFTFLIGIGLFNLFKHDITVLKALNPLYIIYYFRRTGRKGWISLGGVFLCITGTEAMFADLGHFSVQAVQISFSCVAYPALVTIYCGQAAYLTKHTSNVSNTFYDSIPDPLYWPTFVVAVAASIIASQAMISGAFSVISQSL…
28	522	Dicotyledons	Brassicales		Arabidopsis lyrata	9	AlyHAK9	II:a	>Alyrata|945746|945746	MADRRNRCNQILLLAYQSFGLVFGDLSISPLYVYKCTFYGGLKHHQTEDTIFGAFSLIFWTITLLSLIKYMVFVLSADDNGEGGIFALYALLCRHARFSLLPNQQAADEEISTYYGPGDASRNLPSSAFKSLIERNKRSKTALLVLVLVGTSMVITIGVLTPAISVSSSIDGLVAKTSLKHSTVVMIACALLVGLFVLQHRGTNKVAFLFAPIMILWLLIIATVGVYNIVTWNPSVYKALSPYYIYVFFRDTGIDGWLSLGGILLCITGTEAIFAELGQFTATSIRFAFCCVVYPCLVLQYMGQAAFLSKNFSALPSSFYSSIPDPFFWPVLMMAMLAAMVASQAVIFATFSIVKQCYALGCFPRVKIVHKPRWVLGQIYIPEINWVVMILTLTVTICF…
28	523	Dicotyledons	Brassicales		Arabidopsis lyrata	10	AlyHAK10	II:a	>Alyrata|477306|477306	MAVAESGVSPRRNPSQLSWMSNLILAYQSFGVVYGDLSTSPLYVFPCTFIGKLHKHHNEEAVFGAFSLIFWTLTLFPLLKYLLVLLSADDNGEGGTFALYSLLCRHAKLSLLPNQQAADEELSAYKFGPSTDTRTSSPFRRFLEKHKWLRTALLLLVLFGAAMVIGDGVLTPAISVLSSMSGLQATDKKLTDGELLVLACVILVGLFALQHCGTHRVAFMFAPIVIIWLISILFIGLYNILHWNPKIIHAVSPLYIIKFFRVTGQAGWISLGGILLSVTGTEAIFANLGHFTSVSIRLAFAVVVYPCLVVQYMGQAAFLSKNLGSIPNSFYDSVPDPVFWPVFVIATLAAIVGSQAVITATFSIVKQCHALGCFPRIKVVHTSKHIYGQIYIPEINWIL…
28	524	Dicotyledons	Brassicales		Arabidopsis lyrata	11	AlyHAK11	V	>Alyrata|925040|925040	MDEIEEGSSNNSIRRVGTGSSDRRWVDGSEVDSETPLFSEIRDRDYSFGNLRRRLMKKPKRADSLDVEAMEIAGSHGHNLKDLSLLGTLGIAFQTLGVVYGDMGTSPLYVFSDVFSKVPIRSEVDVLGALSLVIYTIAVIPLAKYVFVVLKANDNGEGGTFALYSLICRYAKVNKLPNQQPADEQISSFRLKLPTPELERALWIKEALETKGYLKTLLLLLVLMGTSMIIGDGILTPAMSVMSAMSGLQGEVKGFGTNALVMSSIVILVALFSIQRFGTGKVGFLFAPVLALWFFSLGAIGIYNLLKYNITVIRALNPFYIVLFFNKNSKQAWSALGGCVLCITGAEAMFADLGHFSVRSIQMAFTCVVFPCLLLAYMGQAAYLTKHPEASARIFYDSV…
28	525	Dicotyledons	Brassicales		Arabidopsis lyrata	12	AlyHAK12	III	>Alyrata|336243|336243	MEDFVVWGYNLSFQSLGVVYGDLGTSPLYVFYNTFPRGIKDPEDIIGALSLIIYSLTLIPLLKYVFVVCKANDNGQGGTFALYSLLCRHAKVSTIPNQHRTDEELTTYSRTTFHEHSFAAKTKRWLEKGISRKNALLILVLVGTCMVIGDGILTPAISVLSAAGGLRVNLPHINNGIVVVVAVVILVSLFSVQHYGTDRVGWLFAPIVFLWFLFIASIGMFNIWKHDPSVLKAFSPVYIYRYFKRGGQDRWTSLGGIMLSITGIEALFADLSHFPVSAVQFAFTVIVFPCLLLAYSGQAAYLRKYPHHVEDAFYQSIPILLFTVLSLVVECTYFSAVLFKVNQGGWVPLVIAAAFLVIMYVWHYGTLKRYEFEMHSKVSMAWILGLGPSLGLVRVPGIG…
28	526	Dicotyledons	Brassicales		Arabidopsis lyrata	13	AlyHAK13	V	>Alyrata|944578|944578	MFHVEEESSGGDGSEIDEEFGGDDSTTSLSRWVFDEKDDYEVNEDYDDDGYDEHNHAEMDSDEEDDNVEQRLIRTSPAVDSFDVDALEIPGTQKNEIEDTGIGKKLILALQTLGVVFGDIGTSPLYTFTVMFRRSPINDKDDILGALSLVIYTLILIPLVKYVHFVLWANDDGEGGTFALYSLICRHANVSLIPNQLPSDARISGFGLKVPSPELERSLIIKERLEASMALKKLLLILVLAGTAMVIADAVVTPAMSVMSAIGGLKVGVGVIEQDQVVVISISFLVILFSVQKYGTSKLGLVLGPALLLWFFCLAGIGIYNLVKYDSSVFKAFNPAYIYFFFKRNSVNAWYALGGCVLCATGSEAMFADLSYFSVHSVQLTFTLLVLPCLLLGYLGQAA…
28	527	Dicotyledons	Brassicales		Arabidopsis lyrata	14	AlyHAK14	I:a	>Alyrata|358974|358974	MGLIPNQEPEDRELSNYTLEHPTKQLTRAHMIKEKLENSKFSKILLFLVTIMGTSMVIGDGILTPSISVLSAVSGIKPLGQDTVVGVSVAILIILFAFQRFGTDKVGFSFAPIILVWFTFLTGIGLFNLFKHDITVLKALNPLYIIYYFRRTGRKGWISLGGVFLCITGTEAMFADLGHFSVRAIQISFSCVAYPALVTIYCGQAAYLTKHTSNVSNTFYDSIPDPLYWPTFVVAVAASIIASQAMISGAFSVISQSLRMGCFPRVKVVHTSAKYEGQVYIPEINYFLMLACIAVTLAFRTTEKIGHAYGIAVVTVMVITTIMVTLIMLVIWKTNIVWIATFLVLFGSIETLYLSSVMYKFTSGGYLPLAITVVLMAMMAIWQYVHILKYRYEMREKIS…
28	528	Dicotyledons	Brassicales		Arabidopsis lyrata	15	AlyHAK15	I:a	>Alyrata|915047|915047	MDGEEPQIDGEVNNHENKLNGKKKSWGKLFRPDSFTIEAGQTPINTGRPSLMSWRTTMSLAFQSLGVVYGDIGTSPLYVYASTFTQGINDKDDVIGVLSLIIYTITLVALVKYVFIVLQANDNGEGGTFALYSLICRYAKMGLIPNQEPEDRELSNYALELPTTQLRRAQMIKEKLENSKFAKIILFLVTIMGTSMVIGDGILTPSISVLSAVSGIKSLGQDTVVGVSVAILIVLFAFQRFGTDKVGFSFAPIILVWFTFLIGIGLFNLFKHDITVLKALNPLYIIYYFRRAGRDGWISLGGVFLCITGTEAMFADLGHFSVRAVQISFSCVAYPALVTIYCGQAAYLTKHTSNVSNTFYDSIPDPIYWPTFVVAVAASIIASQAMISGAFSIISQSLR…
29	529	Dicotyledons	Brassicales		Capsella rubella	1	CrHAK1	III	>Crubella|Carubv10008338m.g|Carubv10008338m	MASRVETSMGSGEIDEEGDERGGMWDLDQTLDQPMDEEAGRLRFMYTEKKFSAFLLLQLSFQSLGVVYGDLGTSPLYVFYNTFPRGIKDPEDIIGALSLIIYSLTLIPLLKYVFVVCKANDNGQGGTFALYSLLCRHAKVSTIPNQHRTDEELTTYSRTTFHEHSFAAKTKRWLEKGTSRKNSLLILVLVGTCMVIGDGILTPAISVLSAAGGLRVNLPNLNNGVVVVVAVVILVSLFSVQHYGTDRVGWLFAPIVFLWFLFIASIGMFNIWEHDPSVLKAFSPVYIYRYFKRGGQDRWTSLGGIMLSITGIEALFADLSHFPVSAVQIAFTIIVFPCLLLAYSGQAAYLRKYPHHVEDAFYQSIPKKVYWPMFVIATAAAIVASQATISATFSLIKQA…
29	530	Dicotyledons	Brassicales		Capsella rubella	2	CrHAK2	II:a	>Crubella|Carubv10007347m.g|Carubv10007347m	MADRRNRCNQVLLLAYQSFGLVFGDLSISPLYVYKCTFYGGLRHHQTEDTIFGAFSLIFWTITLLSLIKYMVFVLSADDNGEGGIFALYALLCRHARFSLLPNQQAADEEISTYYGPGDASRNLPSSAFKSLIERNKRSKTALLVLVLVGTSMVITIGVLTPAISVSSSIDGLVAKTSLKHSTVVMIACALLVGLFVLQHRGTNKVAFLFAPIMILWLLIIATVGVYNIVTWNPSVYKALSPYYIYVFFRDTGIDGWLSLGGILLCITGTEAIFAELGQFTATSIRFAFCCVVYPCLVLQYMGQAAFLSKNFSALPSSFYSSIPDPFFWPVLMMAMLAAMVASQAVIFATFSIVKQCYALGCFPRVKIVHKPRWVLGQIYIPEINWVVMILTLAVTICF…
29	531	Dicotyledons	Brassicales		Capsella rubella	3	CrHAK3	V	>Crubella|Carubv10004118m.g|Carubv10004118m	MFHVEEESSGGDGSEIDEEIAGDDSTTSLSRWVFDEKDDYEVNEDYDDDGYDDHNHAEMDSDDEDDNVEQRLIRTSPAVDSFDVDALEIPGTQKNEIEESGIGKKLILALQTLGVVFGDIGTSPLYTFSVMFRRSPINDKDDIIGALSLVIYTLILIPLVKYVHFVLWANDDGEGGTFALYSLICRHANVSLIPNQLPSDARISGFGLKVPSSELERSLIIKERLEASMALKKLLLILVLAGTAMVIADAVVTPAMSVMSAIGGLKVGVGAIEQDQVVVISVSFLVILFSVQKYGTSKLGLVLGPALLLWFFCLAGIGIYNLIKYDSSVFKAFNPAYIYFFFKRNSVNAWYALGGCVLCATGSEAMFADLSYFTVHSVQLTFILLVLPCLLLGYLGQAA…
29	532	Dicotyledons	Brassicales		Capsella rubella	4	CrHAK4	III	>Crubella|Carubv10004157m.g|Carubv10004157m	MAERVESSVTEGENTIEEREVGAMWELEKKLDQPMDEEANKVNNMYREKYSIWTILRLSFQSLGIVYGDLGTSPLYVFYNTFPDGIDDKEDVIGALSLIIYSLLLIPLIKYVFIVCKANDNGQGGTLAIYSLLCRHAKVKLIPNQRRSDEELTTYSRTLSTEGSFAAKTKKWLEGKEWRKRALLVIVLLGTCMMIGDGILTPAISVLSATGGIKVNRPKMSGDVVVLVSIVILIGLFSMQHYGTDKVGWLFAPIVLIWFLFIGATGVYNICKHDTSVLKAFSPTYIYLYFKRRGRDGWISLGGILLSITGTEALYADIAYFPLLAIQLAFTFFVFPCLLLAYCGQAAYLVNNTDHYKDAFYASIPDSVYWPMFVFATGAAIVGSQATISGTYSIVKQAV…
29	533	Dicotyledons	Brassicales		Capsella rubella	5	CrHAK5	I:a	>Crubella|Carubv10006871m.g|Carubv10006871m	MDGEEEHQIDGEVNNHHENKLNEKKRSWGKLFRPDSFSIEAGKTPTNTNHTSLLSWRTTLSLAFQSLGVVYGDIGTSPLYVYASTFTEGIQDKDDVIGVLSLIIYTLTLVALLKYVFIVLQANDNGEGGTFALYSLICRYAKMGLIPNQEPEDRDLSNYTLELPTKQLRRAHMIKEKLENSKFMKIILFLVTIMGTSMVIGDGILTPSISVLSAVSGIKSLGQNTVVGVSVAILILLFAFQRFGTDKVGFSFAPIILVWFTLLTGIGLFNLFKHDITVLKALNPLYIIQYFRRTGKKGWISLGGVFLCITGTEAMFADLGHFSVRAVQISFSCVTYPALLTIYCGQAAYLTKHTSNVSNTFYDSIPDPIYWPTFVVAVAASIIASQAMISGAFSVISQS…
29	534	Dicotyledons	Brassicales		Capsella rubella	6	CrHAK6	II:a	>Crubella|Carubv10016314m.g|Carubv10016314m	MVSAESGVSPRRDPSQLSWMNLSRNLILAYQSFGLVYGDLSTSPLYVFPSTFIGKLHKHQNEETIFGAFSLIFWTLTLIPLLKYVLVLLSADDNGEGGIFALYSLLCRHAKLSLLPNQQTADEELSAYKFGPSTDAGSSSAFRRFLEKHKRLRTALLVVVLFGAAMVIGDGVLTPAISVMSSMSGLQVTEKKLTDGELLVLACVILVGLFALQHCGTHRVAFMFAPIVITWLISILFIGLYNIIHWNPKIIHAISPIYIIKFFRATGQEGWISLGGVLLSVTGTEAMFSNLGHFTSVSIRLAFAVVVYPCLVVQYMGQAAFLSKNLGSIPNSFYDSIPNIVFWPVFVIATLAAIVGSQAVITATFSIIKQCHALGCFPRIKVVHTSKHIYGQIYIPEIN…
29	535	Dicotyledons	Brassicales		Capsella rubella	7	CrHAK7	II:b	>Crubella|Carubv10022742m.g|Carubv10022742m	MTQSPSLVEQGISQQHLKTVSCANVLTLAYQSLGVIYGDLSTSPLYVYKTTFSGKLSLHENDEEIFGVFSFIFWTFTLIALCKYVFIVLSADDNGEGGTFALYSLLCRYAKLSILPNHQELDEKLSTYATGSPGETRQSAAFKSFFEKHPKSQKFLLIFVLLGTCMAIGDSVLTPTISVLSAVSGVKLKIPNLHENFVVIIACIILVAIFSVQRYGTHRVAFIFAPISTAWLLSISCIGVYNTIKWNPRIVSALSPVYMYKFLRSTGVEGWVSLGGVVLSITGVETMFADLGHFSSLSIKVAFSFFVYPCLILAYMGEAAFLSKHHEDIQQSFYKAIPEPVFWPVFIVATFAAVVGSQAVISATFSIISQCCALDCFPRVKIIHTSSKIHGQIYIPEVN…
29	536	Dicotyledons	Brassicales		Capsella rubella	8	CrHAK8	II:c	>Crubella|Carubv10024650m.g|Carubv10024650m	MDLNLGKCCGSRSSKKESWRSVLLLAYQSLGVVYGDLSISPLYVFKSTFAEDIQHSETNEEIYGVMSFVFWTLTLVPLLKYVFIVLRADDNGEGGTFALYSLICRHVKVSLLPNRQVSDEALSTYKLEHPPEKNHDSCVKRYLEKHKWLHTALLLLVLLGTCMVIGDGLLTPAISVFSAVSGLELNMSKEHHQYAVIPITCFILVCLFSLQHFGTHRVGFVFAPIVLTWLLCISGIGLYNIIQWNPHIYKALSPTYMFMFLRKTRVSGWMSLGGILLCITGAEAMFADLGHFNYAAIQIAFTFLVYPALILAYMGQAAYLSRHHHSAHAIGFYVSVPECLHWPVLAVAILASVVGSQAIISGTFSIINQSQSLGCFPRVKVIHTSDKMHGQIYIPEINW…
29	537	Dicotyledons	Brassicales		Capsella rubella	9	CrHAK9	III	>Crubella|Carubv10022665m.g|Carubv10022665m	MAAKVEAATMGGEIDEEESDERGSMWDLDQKLDQSMDEEAGRLRNMYREKKFSALLLLQLSFQSLGVVYGDLGTSPLYVFYNTFPHGIKDPEDVIGALSLIIYSLTLIPLLKYVFVVCKANDNGQGGTFALYSLLCRHAKVKTIQNQHRTDEELTTYSRTTFHEHSFAAKTKRWLEKHTSRKTALLILVLVGTCMVIGDGILTPAISVLSAAGGLRVNLPHISNGVVVFVAVVILVSLFSVQHYGTDKVGWLFAPIVFLWFLSIASIGMYNIWKHDTSVLKAFSPVYIYRYFKRGGRDRWTSLGGIMLSITGIEALFADLSHFPVSAVQIAFTVIVFPCLLLAYSGQAAYIRRHPDHVADAFYRSIPGSVYWPMFIIATAAAIVASQATISATFSLVKQ…
29	538	Dicotyledons	Brassicales		Capsella rubella	10	CrHAK10	V	>Crubella|Carubv10019804m.g|Carubv10019804m	MEEIEEASSNTSLRRVGTGSSDRRWVDGSEVDSETPLFSEIRDRDYSFGNLRRRLMKKPKRADSLDVEAMEIAGAHGHNLKDLSLLGTLGIAFQTLGVVYGDMGTSPLYVFSDVFSKVPIKSEVDVLGALSLVIYTIAVIPLAKYVFVVLKANDNGEGGTFALYSLICRYAKVNKLPNQQPADEQISSFRLKLPTPELERALGIKEALETKGYLKTLLLLLVLMGTSMIIGDGILTPAMSVMSAMSGLQGEVEGFGTDALVISSIVILVALFSIQRFGTGKVGFLFAPVLALWFFSLGAIGIYNLLKYDITVIRALNPFYIVLFFNKNSKQAWSALGGCVLCITGAEAMFADLGHFSVRSIQMAFTSVVFPCLLLAYMGQAAYLTKHPDASARIFYDSV…
29	539	Dicotyledons	Brassicales		Capsella rubella	11	CrHAK11	II:c	>Crubella|Carubv10019831m.g|Carubv10019831m	MEIESGNYQNIVKKESWRTVLTLAYQSLGVVYGDLSISPLYVYKSTFAEDIHHSESNEEIFGVLSFIFWTITLVPLLKYVFIVLRADDNGEGGTFALYSLLCRHARVNSLPSCQLADEQLIEYKTDSIGSSTTPQSGFAASLKSTLEKHGVLQKILLVLALIGTCMVIGDGVLTPAISVFSAVSGVELSMSKEHHKYIEVPAACIILIGLFALQHYGTHKVGFLFAPVILLWLMCISAIGVYNIFHWNPHVYQALSPYYMYKFLKKTQSRGWMSLGGILLCITGSEAMFADLGHFSQLSIKIAFTSLVYPSLILAYMGQAAYLSQHHVIESEYNIGFYVSVPESLRWPVLVIAILAAVVGSQAIITGTFSIIKQCSALGCFPKVKIVHTSSKIHGQIYI…
29	540	Dicotyledons	Brassicales		Capsella rubella	12	CrHAK12	II:c	>Crubella|Carubv10019831m.g|Carubv10020092m	MCISAIGVYNIFHWNPHVYQALSPYYMYKFLKKTQSRGWMSLGGILLCITGSEAMFADLGHFSQLSIKIAFTSLVYPSLILAYMGQAAYLSQHHVIESEYNIGFYVSVPESLRWPVLVIAILAAVVGSQAIITGTFSIIKQCSALGCFPKVKIVHTSSKIHGQIYIPEINWILMVLCLAVTIGFRDTKRLGNASGLAVITVMLVTTCLMSLVIVLCWHKSVFFAIAFVVFFGTIEALYFSASLIKFLEGAWVPIALSFCFLLSMCTWHYGTLKRYEFDVQNKVSVNWLLSLGQTLGIARVRGLGLIHTELVSGVPAIFSHFVTNLPAFHQVLVFLCVKSVPVPHVRPEERFLVGRIGPKEFRIYRCIVRYGYRDVHKDDFEFEGDLVCSIAEFIRTEAA…
29	541	Dicotyledons	Brassicales		Capsella rubella	13	CrHAK13	II:c	>Crubella|Carubv10000531m.g|Carubv10000531m	MSKQQHQYVEVPVVCAILILLFSLQHYGTHRLGFVFAPIVLTWLLCISTIGVYNIFHWNPHVYKALSPYYIYKFLKKTRGRGWMSLGGILLCITGSEAMFADLGHFTQLSIQIAFTFAVYPSLILAYMGQAAYLSKHHVLESDYRIGFYVSVPEQIRWPVLAIAILAAVVGSQAIITGTFSIIKQCTSLGCFPKVKIVHTSSRMHGQIYIPEINWTLMLLCLAVTVGFRDTKHISNASGLAVITVMLVTTCLMSLVIILCWRKSYIYALAFIFFFGTIEALYFSASLIKFLEGAWVPVALSFIFLLIMYVWHYGTLKRYEFDVQNKVSITWLLTLFGSSNLGIVRVRGIGVINTELVSGIPAIFSHFITNLPAFHQVVVFLCVKSVPVPHVKPEERFLV…
29	542	Dicotyledons	Brassicales		Capsella rubella	14	CrHAK14	V	>Crubella|Carubv10000201m.g|Carubv10000201m	MAEESSLEGSEKEEIDSSGAGLGDLASMDSIESRWVIQDDDDSEIGVEDDNDGFDGTGLESDEDEIPEHRLIRTGPRVDSFDVEALEVPGAPRNDYEDLTVGRRVLLAFQTLGVVFGDVGTSPLYTFSVMFSKSPVQEKEDVIGALSLVLYTLLLVPLIKYVLVVLWANDDGEGGTFALYSLISRHAKISLIPNQLRSDARISSFRLKVPCPELERSLKLKEKLENSLILKKLLLVLVLAGTSMVIADGVVTPAMSVMSAVGGLKVGVDVVEQDQVVMISVAFLVILFSLQKYGTSKMGLVVGPALLIWFCCLAGIGIYNLIKYDSSVYRAFNPVHIYYFFKRNSVNAWYALGGCILCATGSEALFADLCYFSVRSVQLTFVCLVLPCLMLGYMGQAAY…
30	543	Dicotyledons	Brassicales		Capsella grandis	1	CgHAK1	V	>Cagra.0844s0048 peptide: Cagra.0844s0048.1.p (PAC:28914920)	MFHVEEESSGGDGSEIDEEIAGDDSTTSLSRWVFDEKDDYEVNEDYDDDGYDDHNHAEMDSDDEDDNVEQRLIRTSPAVDSFDVDALEIPGTQKNEIEESGIGKKLILALQTLGVVFGDIGTSPLYTFSVMFRRSPINDKDDIIGALSLVIYTLILIPLVKYVHFVLWANDDGEGGTFALYSLICRHANVSLIPNQLPSDARISGFGLKVPSSELERSLIIKERLEASMALKKLLLILVLAGTAMVIADAVVTPAMSVMSAIGGLKVGVGAIEQDQVVVISVSFLVILFSVQKYGTSKLGLVLGPALLLWFFCLAGIGIYNLIKYDSSVFKAFNPAYIYFFFKRNSVNAWYALGGCVLCATGSEAMFADLSYFTVHSVQLTFILLVLPCLLLGYLGQAA…
30	544	Dicotyledons	Brassicales		Capsella grandis	2	CgHAK2	III	>Cagra.0993s0017 peptide: Cagra.0993s0017.1.p (PAC:28903505)	MAAKVEAATMGGEIDEEESDERGSMWDLDQKLDQSMDEEAGRLRNMYREKKFSALLLLQLSFQSLGVVYGDLGTSPLYVFYNTFPHGIKDPEDVIGALSLIIYSLTLIPLLKYVFVVCKANDNGQGGTFALYSLLCRHAKVKTIQNQHRTDEELTTYSRTTFHEHSFAAKTKRWLEKHTSRKTALLILVLVGTCMVIGDGILTPAISVLSAAGGLRVNLPHISNGVVVFVAVVILVSLFSVQHYGTDKVGWLFAPIVFLWFLSIASIGMYNIWKHDTSVLKAFSPVYIYRYFKRGGRDRWTSLGGIMLSITGIEALFADLSHFPVSAVQIAFTVIVFPCLLLAYSGQAAYIRRHPDHVADAFYRSIPGSVYWPMFIIATAAAIVASQATISATFSLVKQ…
30	545	Dicotyledons	Brassicales		Capsella grandis	3	CgHAK3	II:c	>Cagra.1036s0069 peptide: Cagra.1036s0069.1.p (PAC:28903697)	MDLERLSPRNPVKKESWWTVLTLAYQSLGVVYGDLATSPLYVFKSTFAEDITHSETNEEIFGVLSLIFWTLTLIPLVKYVFIVLRADDNGEGGTFALYSLLCRHARISSLPNFQLADEDLSEYNKNPEEDPRSLKVPGWSLKNTLEKHKFLQNMLLVLALIGTCMVIGDGVLTPAISVFSAVSGLELSMSKQQHQYVEVPVVCAILILLFSLQHYGTHRLGFVFAPIVLTWLLCISTIGVYNIFHWNPHVYKALSPYYIYKFLKKTRGRGWMSLGGILLCITGSEAMFADLGHFTQLSIQIAFTFAVYPSLILAYMGQAAYLSKHHVLESDYRIGFYVSVPEQIRWPVLAIAILAAVVGSQAIITGTFSIIKQCTSLGCFPKVKIVHTSSRMHGQIYIP…
30	546	Dicotyledons	Brassicales		Capsella grandis	4	CgHAK4	II:a	>Cagra.1226s0026 peptide: Cagra.1226s0026.1.p (PAC:28916588)	MADRRNRCNQVLLLAYQSFGLVFGDLSISPLYVYKCTFYGGLRHHQTEDTIFGAFSLIFWTITLLSLIKYMVFVLSADDNGEGGIFALYALLCRHARFSLLPNQQAADEEISTYYGPGDASRNLPSSAFKSLIERNKRSKTALLVLVLVGTSMVITIGVLTPAISVSSSIDGLVAKTSLKHSTVVMIACALLVGLFVLQHRGTNKVAFLFAPIMILWLLIIATVGVYNIVTWNPSVYKALSPYYIYVFFRDTGIDGWLSLGGILLCITGTEAIFAELGQFTATSIRFAFCCVVYPCLVLQYMGQAAFLSKNFSALPSSFYSSIPDPFFWPVLMMAMLAAMVASQAVIFATFSIVKQCYALGCFPRVKIVHKPRWVLGQIYIPEINWVVMILTLAVTICF…
30	547	Dicotyledons	Brassicales		Capsella grandis	5	CgHAK5	V	>Cagra.1365s0112 peptide: Cagra.1365s0112.1.p (PAC:28919208)	MAEESSLEGSEKEEIDSSGAGLGDLASMDSIESRWVIQDDDDSEIGVEDDNDGFDGTGLESDEDEIPEHRLIRTGPRVDSFDVEALEVPGAPRNDYEDLTVGRRVLLAFQTLGVVFGDVGTSPLYTFSVMFSKSPVQEKEDVIGALSLVLYTLLLVPLIKYVLVVLWANDDGEGGTFALYSLISRHAKISLIPNQLRSDARISSFRLKVPCPELERSLKLKEKLENSLILKKLLLVLVLAGTSMVIADGVVTPAMSVMSAVGGLKVGVDVVEQDQVVMISVAFLVILFSLQKYGTSKMGLVVGPALLIWFCCLAGIGIYNLIKYDSSVYRAFNPVHIYYFFKRNSVNAWYALGGCILCATGSEALFADLCYFSVRSVQLTFVSLVLPCLMLGYMGQAAY…
30	548	Dicotyledons	Brassicales		Capsella grandis	6	CgHAK6	III	>Cagra.1508s0083 peptide: Cagra.1508s0083.1.p (PAC:28905736)	MASRVETSMGSGEIDEEGDERGGMWDLDQTLDQPMDEEAGRLRFMYTEKKFSAFLLLQLSFQSLGVVYGDLGTSPLYVFYNTFPRGIKDPEDIIGALSLIIYSLTLIPLLKYVFVVCKANDNGQGGTFALYSLLCRHAKVSTIPNQHRTDEELTTYSRTTFHEHSFAAKTKRWLEKGTSRKNSLLILVLVGTCMVIGDGILTPAISVLSAAGGLRVNLPNLNNGVVVVVAVVILVSLFSVQHYGTDRVGWLFAPIVFLWFLFIASIGMFNIWKHDPSVLKAFSPVYIYRYFKRGGQDRWTSLGGIMLSITGIEALFADLSHFPVSAVQIAFTILVFPCLLLAYSGQAAYLRKYPHHVEDAFYQSIPKNVYWPMFVIATAAAIVASQATISATFSLIKQA…
30	549	Dicotyledons	Brassicales		Capsella grandis	7	CgHAK7	II:a	>Cagra.1561s0066 peptide: Cagra.1561s0066.1.p (PAC:28907440)	MVSAESGVSPRRDPSQLSWMNLSRNLILAYQSFGLVYGDLSTSPLYVFPSTFIGKLHKHQNEETIFGAFSLIFWTLTLIPLIKYVLVLLSADDNGEGGIFALYSLLCRHAKLSLLPNQQTADEELSAYKFGPSTDAGSSSAFRRFLEKHKRLRTALLVVVLFGAAMVIGDGVLTPAISVMSSMSGLQVTEKKLTDGELLVLACVILVGLFALQHCGTHRVAFMFAPIVITWLISLLFIGLYNIIHWNPKIIHAISPIYIIKFFRATGQEGWISLGGVLLSVTGTEAMFSNLGHFTSVSIRLAFAVVVYPCLVVQYMGQAAFLSKNLGSIPNSFYDSIPNIVFWPVFVIATLAAIVGSQAVITATFSIIKQCHALGCFPRIKVVHTSKHIYGQIYIPEIN…
30	550	Dicotyledons	Brassicales		Capsella grandis	8	CgHAK8	II:c	>Cagra.1642s0017 peptide: Cagra.1642s0017.1.p (PAC:28898909)	MDLNLGKCCGSRSSKKESWRSVLLLAYQSLGVVYGDLSISPLYVFKSTFAEDIQHSETNEEIYGVMSFVFWTLTLVPLLKYVFIVLRADDNGEGGTFALYSLICRHVKVSLLPNRQVSDEALSTYKLEHPPEKNHDSCVKRYLEKHKWLHTALLLLVLLGTCMVIGDGLLTPAISVFSAVSGLELNMSKEHHQYAVIPITCFILVCLFSLQHFGTHRVGFVFAPIVLTWLLCISGIGLYNIIQWNPHIYKALSPTYMFMFLRKTRVSGWMSLGGILLCITGAEAMFADLGHFNYAAIQIAFTFLVYPALILAYMGQAAYLSRHHHSAHAIGFYVSVPKCLHWPVLAVAILASVVGSQAIISGTFSIINQSQSLGCFPRVKVIHTSDKMHGQIYIPEINW…
30	551	Dicotyledons	Brassicales		Capsella grandis	9	CgHAK9	II:c	>Cagra.1777s0041 peptide: Cagra.1777s0041.1.p (PAC:28910339)	MEIESGSYQNIVKKESWRTVLTLAYQSLGVVYGDLSISPLYVYKSTFAEDIHHSESNEEIFGVLSFIFWTITLVPLLKYVFIVLRADDNGEGGTFALYSLLCRHARVNSLPSCQLADEQLIEYKTDSIGSSTTPQSGFAASLKSTLEKHGVLQKILLVLALIGTCMVIGDGVLTPAISVFSAVSGVELSMSKEHHKYIEVPAACIILIGLFALQHYGTHKVGFLFAPVILLWLMCISAIGVYNIFHWNPHVYQALSPYYMYKFLKKTQSRGWMSLGGILLCITGSEAMFADLGHFSQLSIKIAFTSLVYPSLILAYMGQAAYLSQHHVIESEYNIGFYVSVPESLRWPVLVIAILAAVVGSQAIITGTFSIIKQCSALGCFPKVKIVHTSSKIHGQIYI…
30	552	Dicotyledons	Brassicales		Capsella grandis	10	CgHAK10	III	>Cagra.2564s0026 peptide: Cagra.2564s0026.1.p (PAC:28894263)	MAERVESSVTEGENTIEEREVGAMWELEKKLDQPMDEEANKVNNMYREKYSIWTILRLSFQSLGIVYGDLGTSPLYVFYNTFPDGIDDKEDVIGALSLIIYSLLLIPLIKYVFIVCKANDNGQGGTLAIYSLLCRHAKVKLIPNQRRSDEELTTYSRTLSTEGSFAAKTKKWLEGKEWRKRALLVIVLLGTCMMIGDGILTPAISVLSATGGIKVNRPKMSGDVVVLVSIIILIGLFSMQHYGTDKVGWLFAPIVLIWFLFIGATGVYNICKHDTSVLKAFSPTYIYLYFKRRGRDGWISLGGILLSITGTEALYADIAYFPLLAIQLAFTFFVFPCLLLAYCGQAAYLVNNTDHYKDAFYASIPDSVYWPMFVFATGAAIVGSQATISGTYSIVKQAV…
30	553	Dicotyledons	Brassicales		Capsella grandis	11	CgHAK11	II:b	>Cagra.2771s0005 peptide: Cagra.2771s0005.1.p (PAC:28908119)	MTQSPSLVEQGISQQHLKTVSCANVLTLAYQSLGVIYGDLSTSPLYVYKTTFSGKLSLHENDEEIFGVFSFIFWTFTLIALFKYVFIVLSADDNGEGGTFALYSLLCRYAKLSILPNHQELDEKLSTYATGSPGETRQSAAFKSFFEKHPKSQKFLLIFVLLGTCMAIGDSVLTPTISVLSAVSGVKLKIPNLHENFVVIIACIILVAIFSVQRYGTHRVAFIFAPISTAWLLSISCIGVYNTIKWNPRIVSALSPVYMYKFLRSTGVEGWVSLGGVVLSITGVETMFADLGHFSSLSIKVAFSFVVYPCLILAYMGEAAFLSKHHEDIQQSFYKAIPEPVFWPVFIVATFAAVVGSQAVISATFSIISQCCALDCFPRVKIIHTSSKIHGQIYIPEVN…
30	554	Dicotyledons	Brassicales		Capsella grandis	12	CgHAK12	I:a	>Cagra.5804s0001 peptide: Cagra.5804s0001.1.p (PAC:28910659)	MDGEEEHQLDGEVNNHHENKLNEKKRSWGKLFRPDSFSIEAGKTPTNTNHTSLLSWRTTLSLAFQSLGVVYGDIGTSPLYVYASTFTEGIQDKDDVIGVLSLIIYTLTLVALLKYVFIVLQANDNGEGGTFALYSLICRYAKMGLIPNQEPEDRDLSNYTLELPTKQLRRAHMIKEKLENSKFMKIILFLVTIMGTSMVIGDGILTPSISVLSAVSGIKSLGQNTVVGVSVAILILLFAFQRFGTDKVGFSFAPIILVWFTLLTGIGLFNLFKHDITVLKALNPLYIIHYFRRTGKKGWISLGGVFLCITGTEAMFADLGHFSVRAVQISFSCVTYPALLTIYCGQAAYLTKHTSNVSNTFYDSIPDPIYWPTFVVAVAASIIASQAMISGAFSVISQS…
30	555	Dicotyledons	Brassicales		Capsella grandis	13	CgHAK13	V	>Cagra.9559s0004 peptide: Cagra.9559s0004.1.p (PAC:28918101)	MEEIEEASSNTSLRRVGTGSSDRRWVDGSEVDSETPLFSEIRDRDYSFGNLRRRLMKKPKRADSLDVEAMEIAGAHGHNLKDLSLLGTLGIAFQTLGVVYGDMGTSPLYVFSDVFSKVPIKSEVDVLGALSLVIYTIAVIPLAKYVFVVLKANDNGEGGTFALYSLICRYAKVNKLPNQQPADEQISSFRLKLPTPELERALGIKEALETKGYLKTLLLLLVLMGTSMIIGDGILTPAMSVMSAMSGLQGEVEGFGTDALVISSIVILVALFSIQRFGTGKVGFLFAPVLALWFFSLGAIGIYNLLKYDITVIRALNPFYIVLFFNKNSKQAWSALGGCVLCITGAEAMFADLGHFSVRSIQMAFTSVVFPCLLLAYMGQAAYLTKHPDASARIFYDSV…
31	556	Dicotyledons	Brassicales	saltwater cress	Eutrema salsugineum	1	EsHAK1	III	>Thalophila|Thhalv10016270m.g|Thhalv10016270m	MAARVEAATMGGEIDEESDERGSMWDLDQKLDQSMDEEAGRLRNMYREKKFSAFLLLQLSFQSLGVVYGDLGTSPLYVFYNTFPHGIKDPEDIIGALSLIIYSLTLIPLLKYVFVVCKANDNGQGGTFALYSLLCRHAKVKTIRNQHRTDEELTTYSRSTFHEHSFAAKTKRWLEKRTSRKTALLILVLVGTCMVIGDGILTPAISVLSAAGGLRVNLPHISNGVVVLVAVIILISLFSVQHYGTDRVGWLFAPIVFLWFLSIASIGIYNIWKHDSDVLKAFSPVYIYRYFKRGGRDRWTSLGGIMLSITGIEALFADLSHFPVSAVQIAFTVIVFPCLLLAYSGQAAYIRRHPDHVADAFYRSIPGSVYWPMFIIATAAAIVASQATISATFSLIKQA…
31	557	Dicotyledons	Brassicales	saltwater cress	Eutrema salsugineum	2	EsHAK2	II:c	>Thalophila|Thhalv10016272m.g|Thhalv10016272m	MDLNFGRCCGSRKKESWRSVLLLAYQSLGVVYGDLSISPLYVFKSTFAEDIQHSETNEEIYGVMSFVFWTLTLLPLLKYVFIVLRADDNGEGGTFALYSLICRHVKVSLLPNRQVADEALSTYKLEHPPEKNHDSCVKRYLEKHKWLHTALLLLVLLGTCMVIGDGLLTPAISVFSAVSGLELNMSKEHHQYAVIPITCFILVCLFALQHFGTHRVGFVFAPIVLTWLLCISAIGLYNIIQWNPHVYKALSPKYMFMFLRKTRVSGWMSLGGILLCITGAEAMFADLGHFNYAAIQIAFTFLVYPALILAYMGQAAYLSRHHHSAHAIGFYVSVPKCVHWPVLMIAILASVVGSQAIISGTFSIINQSQSLGCFPRVKVIHTSDKIHGQIYIPEINWML…
31	558	Dicotyledons	Brassicales	saltwater cress	Eutrema salsugineum	3	EsHAK3	II:b	>Thalophila|Thhalv10016325m.g|Thhalv10016325m	MNQSPTLIEQGISHQHLKAVSCANVLTLAYQSLGVIYGDLSTSPLYVYKTTFSGKLSLHENDEEIFGVFSFIFWTFTLIALFKYVFIVLSADDNGEGGTFALYSLLCRYAKLRILPNHQEMDEKLSTYAMGSPGETRQSAAVKSFFEKHPKSQKCLLIFVLLGTCMAIGDSVLTPTISVLSAVSGVKLKIPELHENYVVIISCIILVAIFSVQRYGTHRVAFIFAPISTAWLLSISSIGVYNTIKWNPRIVSALSPVYMYKFLRSTGVEGWVSLGGVVLSITGVETMFADLGHFSSLSIKVAFSFFVYPCLILAYMGEAAFLSKNHEDIQRSFYKAIPEPVFWPVFIVATFAAVVGSQAVISATFSIISQCCALDCFPRVKIIHTSSKIHGQIYIPEVN…
31	559	Dicotyledons	Brassicales	saltwater cress	Eutrema salsugineum	4	EsHAK4	II:a	>Thalophila|Thhalv10020105m.g|Thhalv10020105m	MAAAESGVSSTGNPSQLSWVNISRNLILAYQSFGVVYGSLCTSPLYVYRSTFIGTLRNHQNEEAVFGAFSLIFWTLTLIPLLKYVLVLLSAHDNGEGGTFALYSLLCRHAKLSLLPNQQAADEELSAYKCGPSTDTGTSSPFTRILEKHKRLRTALLVVVLFGAAMVIGDGVLTPAISVLSSMSGLQATEKKSTDGELLFLACVILVGLFALQHCGTHRVAFMFAPIVIIWLISILLIGLYNIIHWNPKILHALSPLYIIKFFRVTGQDGWISLGGVLLSVTGTEAMFANLGHFTSVSIRLAFAAVVYPCLVVQYMGQAAFLSKNLKSIPNSFYNSIPDPVFWPVFVIATLAAIVGSLAVITATFSIIKQCHALGCFPRVKVVHTWKHVFGQIYIPEIN…
31	560	Dicotyledons	Brassicales	saltwater cress	Eutrema salsugineum	5	EsHAK5/ThHAK5	I:a	>Thalophila|Thhalv10024742m.g|Thhalv10024742m	MDGEEHQIDGEVNNQEHNHDHEHKLKEKKKSWGKLFRPDSFSIEAGKTPKNTGHSSLLSWRTTMSLAFQSLGVVYGDIGTSPLYVYASTFTEGINDKDDVIGVLSLIIYTLTLVALLKYVFIVLQANDNGEGGTFALYSLICRYAKTGLIPNQEPEDSELSNYTLELPNTKIRRSHKIKEKLENSKFAKIILFLVTIMGTSMVIGDGILTPSISVLSAVSGIKSLGQNTVVGVSVAILILLFAFQRFGTDKVGFSFAPIIFVWFMFLTGIGLVNLFKHDITVLKALNPLYIIHYFRRNGKKGWISLGGVFLCITGTEAMFADLGHFSVRAVQISFSCIAYPALVTIYCGQAAYLTKHTSNVSNTFYDSIPDPFYWPTFVVAVAASIIASQAMISGAFSV…
31	561	Dicotyledons	Brassicales	saltwater cress	Eutrema salsugineum	6	EsHAK6	III	>Thalophila|Thhalv10006837m.g|Thhalv10006837m	MAARVEASIGSEIGEETDERGSMWDLDQSLDQPMDAEAGRLRNMYREKKFSAFLLLQLSFQSLGVVYGDLGTSPLYVFYNTFPRGIQDPEDIIGALSLIIYSLTLIPLLKYVFVVCKANDNGQGGTFALYSLLCRHAKVNTIPNQHRTDEELTTYSRSTFHEHSFAAKTKRWLEKGPSRKNSLLILVLVGTCMVIGDGILTPAISVLSAAGGLRVNLPHINNGVVVVVAVVILVSLFSVQHYGTDRVGWLFAPVVFLWFLFIASIGMYNVWKHDPSVLKAFSPVYIYRYFKRGGQDRWTSLGGIMLSITGIEALFADLSHFPVSAVQIAFTVIVFPCLLLAYSGQAAYLRKYPHHVEDAFYQSIPKSVYWPMFIVATFAAIVASQATISATFSLIKQAL…
31	562	Dicotyledons	Brassicales	saltwater cress	Eutrema salsugineum	7	EsHAK7	II:c	>Thalophila|Thhalv10018152m.g|Thhalv10018152m	MDIESGTYQNIVKKESWRTVLTLAYQSLGVVYGDLSISPLYVYKSTFAEDIHHSESNEEIFGVLSFIFWTITLVPLFKYVFIVLRADDNGEGGTFALYSLLCRHARVNSLPSCQLADEQLIEYKADSNGSSSAIPQSGFAASLKSTLEKHRVLQKILLVLALIGTCMVIGDGVLTPAISVFSAVSGVELSMSKEHHKYIEVPAACIILIGLFALQHYGTHRVGFLFAPVILLWLMCISTIGVYNIFHWNPHVYQALSPYYMYKFLKKTQSRGWMSLGGILLCITGSEAMFADLGHFSQLSIKIAFTSLVYPSLILAYMGQAAYLSQHHVIESDYRIGFYVSVPENLRWPVLVVAILAAVVGSQAIITGTFSIIKQCSALGCFPKVKIVHTSSKIHGQIY…
31	563	Dicotyledons	Brassicales	saltwater cress	Eutrema salsugineum	8	EsHAK8	III	>Thalophila|Thhalv10024437m.g|Thhalv10024437m	MAERVEEPVTEGENTIEERQIGAMWDLEQKLDQPMDEEANKLKNMYREKGLSLLMLMRLSFQSLGIVYGDLGTSPLYVFYNTFPNGISDSDDVIGALSLIIYSLFLIPLIKYVFIVCKANDNGQGGTLAIYSLLCRHAKVKLIPNQQRSDEDLTTYSRTIFPEGSFAAKTKKWLEGKHSRKRALLVIVLLGTCMMIGDGILTPAISVLSATGGIKLRSPDMSGDIVVLVSIIILIGLFSMQHYGTDKVGWLFAPIVFIWFLFIGGTGIYNICKYDTSVLKAFSPTYIYLYFKRRGRDGWISLGGILLSITGTEALYADIAYFPLLAIQLAFTFFVFPCLLLAYCGQAAYLVNHKDHFKDAFYASIPESVYWPMFIVATGAAIVGSQATISGTYSIIKQA…
31	564	Dicotyledons	Brassicales	saltwater cress	Eutrema salsugineum	9	EsHAK9	II:a	>Thalophila|Thhalv10024469m.g|Thhalv10024469m	MADRRNRCNQVLLLAYQSFGLVFGDLSISPLYVYKCTFYGGLRHHQTEDTIFGAFSLIFWTITLLSLIKYMVFVLSADDNGEGGIFALYALLCRHARFSLLPNQQAADEEISTYYGPGDATRNLPSSAFKSLIERNKRSKTALLILVLVGTSMVITIGVLTPAISVSSSIDGLVAKTSLKHSTVVMIACALLVGLFVLQHRGTNKVAFLFAPIMILWLLSIASVGLYNIVTWNPSVYKALSPYYIYIFFRDTGIDGWLSLGGILLCITGTEAIFAELGQFTATSIRVAFCCVVYPCLVLQYMGQAAFLSKNFSALPTSFYASIPDPFFWPVLMMAMLAAMVASQAVIFATFSIVKQCYALGCFPRVKIVHKPRWVLGQIYIPEINWVVMILTLAVTICF…
31	565	Dicotyledons	Brassicales	saltwater cress	Eutrema salsugineum	10	EsHAK10	III	>Thalophila|Thhalv10024451m.g|Thhalv10024451m	MAEIGEGEETIKGRNIEAMWDLEQKLDQPMDEEANRLKNMYKEKSLSTLMLLRLAFQSLGIVYGDLGTSPLYVFYNTFPNGINETEDVIGALSLIIYSLLLIPLIKYVFIVCKANDNGQGGTLAIYSLLCRNGKLKLIPDQQRSDEDLTTYSRTFLPEGSLAARTMNWLEKKDSRKRALLIIVLVGTCMTIGDGIFTPAISVLSATGGIRVNNPKMSSDTVVLVAVLILVGLFSMQKYGTDKVAWLFAPIVFIWLLFIGGTGLYNICIYDSRVLKAFSPTYVFMYFKRRGRDGWISLGGILLSITGTEALYDDIAYFPLLAIQLAFTFFVFPCLLLAYCGQAAYLVENKDNVANAFYESIPDSIYWPMFIVATLAAVVGSQATISGTYSIIKQAVAHGC…
31	566	Dicotyledons	Brassicales	saltwater cress	Eutrema salsugineum	11	EsHAK11	V	>Thalophila|Thhalv10024388m.g|Thhalv10024388m	MWNVDEESSGGAGSEMDEEMTGDDSTTSMSRWVFDEKNDYDDDDYDNEGYDEHRDAEMDSDDEDDNVEQRLIRTSPAVDSFDVDALEIPGTQKNEIEDSSIGRKLVLALQTLGVVFGDIGTSPLYTFSVMFNRSPINEKDDIIGALSLVIYTLILFPLVKYVHFVLWANDDGEGGTFALYSLICRHANVSLIPNQLPSDARISGFGLKVPSPELERSLIIKEKLEASMILKKLLLVLVLAGTAMVIADAVVTPAMSVMSAVGGLKVGVGAIEQDQVVMISVSFLVILFSVQKYGASKLGLALGPALLLWFFCLAGIGIYNLVKYDSSVFRAFNPAHIYFFFKRNSVNAWYALGGCILCATGSEAMFADLSYFSVHSVQLTFTLLVLPCLLLGYLGQAAY…
31	567	Dicotyledons	Brassicales	saltwater cress	Eutrema salsugineum	12	EsHAK12	V	>Thalophila|Thhalv10023273m.g|Thhalv10023273m	MEEEDRIEEGSSNNSLRRVDTGSSERSRWVDGSEVGSETLPFSEFRDGEYSFGNLRRRLMKKPKRADSLDVEAMEIAGAHGHNLKDLSLLGTIGIAFQTLGVVYGDMGTSPLYVFSDVFSKVPIRSEVDVLGALSLVIYTIAVIPLAKYVFVVLKANDNGEGGTFALYSLICRYAKVNKLPNQQPADEQISSFRLKLPTPELERALGIKEALETKGYLKTLLLLLVLMGTSMIIGDGILTPAMSVMSAMSGLQGEVEGFGTNALVTSSIVILVALFSIQRFGTGKVGFLFAPVLALWFFSLGSIGIYNLLKYNITVVRALNPYYIVLFFNKNSKQAWSALGGCVLCITGAEAMFADLGHFSVRSIQMAFTCVVFPCLLLAYMGQAAYLTKHPDASARIF…
31	568	Dicotyledons	Brassicales	saltwater cress	Eutrema salsugineum	13	EsHAK13	V	>Thalophila|Thhalv10012655m.g|Thhalv10012655m	MAEESSFDGSEKEEIGSSGGGFGDLGSMDSVESRWVLQDEDDSEIGFDDDDDEFDGTGLESDDEEIPEHRLIRTGPRVDSFDVEALEVPGAPRNDYEDLTIGRRVLLAFQTLGVVFGDVGTSPLYTFSVMFSKSPVQEKEDVIGALSLVLYTLLLIPLIKYVLIVLWANDDGEGGTFALYSLISRHAKISLIPNQLRSDARISSFRLKVPCPELERSLKLKEKLENSLILKKLLLVLVLAGTSMVIADGVVTPAMSVMSAVGGLKVGFDAVEQAISCFFFADQVVMISVAFLVILFSLQKYGTSKMGLVVGPALLIWFCCLAGIGIYNLIKYDSSVYRAFNPVHIYYFFKRNSINAWYALGGCILCATGSEALFADLCYFSVRSVQLTFVCLVLPCLML…
31	569	Dicotyledons	Brassicales	saltwater cress	Eutrema salsugineum	14	EsHAK14	II:c	>Thalophila|Thhalv10012733m.g|Thhalv10012733m	MDLERLSPRNQIKKESWWTVLTLAYQSLGVVYGDLATSPLYVYKSTFAEDIQHSETNEEIFGVLSLIFWTLTLIPLVKYVFIVLRADDNGEGGTFALYSLLCRHARISSLPNFQLADEDLSEYKKNSGANPRNLKAPGWSLKNTLEKHKVLQNMLLVLALIGTCMVIGDGVLTPAISVFSAVSGLELSMSKEQHQYVEVPVVCAILILLFSLQHYGTHRLGFLFAPIVLAWLLCISTIGVYNIFHWNPHVYKALSPYYIYKFLKKTRKRGWMSLGGILLCITGSEAMFADLGHFTQLSIQIAFTFAVYPSLILAYMGQAAYLSKHHVLESDYRIGFYVSVPEKIRWPVLAIAILAAVVGSQAIITGTFSIIKQCTSLGCFPKVKILHTSSKMHGQIYIP…
32	570	Dicotyledons	Brassicales	rockcress	Boechera stricta	1	BsHAK1	V	>Bostr.10040s0210 peptide: Bostr.10040s0210.1.p (PAC:30670049)	MEEIEEGSSNNSLRRVGTGSSDRRWVDGSEVDSETPLFSEIRDRDYSFGNLRRRLMKKPKRADSLDVEAMEIAGSHGHNLKDLSLLGTLGIAFQTLGVVYGDMGTSPLYVFSDVFSKVPIRSDVDVLGALSLVIYTIAVIPLAKYVFVVLKANDNGEGGTFALYSLICRYAKVNKLPNQQPADEQISSFRLKLPTPELERALGIKEALETKGYLKTLLLVLVLMGTSMIIGDGILTPAMSVMSAMSGLQGEVEGFGTNALVMSSIVILVALFSIQRFGTGKVGFLFAPVLALWFFSLGAIGIYNLLKYDITVIRALNPFYIVLFFNKNSKQAWSALGGCVLCITGAEAMFADLGHFSVRSIQMAFTCVVFPCLLLAYMGQAAYLTKHPDASARIFYDSV…
32	571	Dicotyledons	Brassicales	rockcress	Boechera stricta	2	BsHAK2	II:c	>Bostr.10273s0326 peptide: Bostr.10273s0326.1.p (PAC:30656912)	MEIESGSFQNIVKKESWRTVLTLAYQSLGVVYGDLSTSPLYVYKSTFAEDIHHSESNEEIFGVLSFIFWTITLVPLLKYVFIVLRADDNGEGGTFALYSLLCRHARVNSLPSCQLADEQLIEYKTDSIGSSTTPQSGFAASLKSTLEKHGVLQKILLVLALIGTCMVIGDGVLTPAISVFSAVSGVELSMSKDHHKYIEVPAACIILIGLFALQHYGTHRVGFLFAPVILLWLMCISTIGVYNIIHWNPHVYQALSPYYMYKFLKKTQSRGWMSLGGILLCITGSEAMFADLGHFSQLSIKIAFTSLVYPSLILAYMGQAAYLSQHHVIESEYNIGFYVSVPEKLRWPVLVIAILAAVVGSQAIITGTFSIIKQCSALGCFPKVKIVHTSSKIHGQIYI…
32	572	Dicotyledons	Brassicales	rockcress	Boechera stricta	3	BsHAK3	V	>Bostr.13129s0056 peptide: Bostr.13129s0056.1.p (PAC:30673272)	MAEESSLEISEKEEIDSSGGGLGDLASMDSIESRWVIQDDDDSEIGVEDDNDGFDGTGLESDEDEIPEHRLIRTGPRVDSFDVEALEVPGAPRNDYEDLTVGRRVLLAFQTLGVVFGDVGTSPLYTFSVMFSKSPIQEKEDVIGALSLVLYTLLLVPLIKYVLVVLWANDDGEGGTFALYSLISRHAKISLIPNQLRSDARISSFRLKVPCPELERSLKLKEKLENSLILKKLLLVLVLAGTSMVIADGVVTPAMSVISAVGGLKVGVDVVEQDQVVMISVAFLVILFSLQKYGTSKMGLVVGPALLIWFCCLAGIGIYNLIKYDSSVFRAFNPVHIYYFFKRNSINAWYALGGCILCATGSEALFADLCYFSVRSVQLTFVCLVLPCLMLGYMGQAAY…
32	573	Dicotyledons	Brassicales	rockcress	Boechera stricta	4	BsHAK4	II:a	>Bostr.1460s0006 peptide: Bostr.1460s0006.1.p (PAC:30654571)	MAAAESGVSPRRNLSQLSCMNLSRNLILAYQSFGVVYGDLSTSPLYVFSSTFIGKLHKHHNEEAVFGAFSLIFWTLTLIPLLKYVLVLLSADDNGEGGTFALYSLLCRHAKLSLLPNQQAADEELSAYKFGPSTDTGTLSPFRRFLEKHKRLRTALLVVVLFGAAMVIGDGILTPAISVMSSMSGLQATEKKLTDGELLVLACVILVGLFALQHCGTHRVAFMFAPIVIIWLISILFIGLYNIIHWNPKIIHAISPLYIIKFFRLTGQDGWISLGGVLLSVTGTEAMFANLGHFTSVSIRLAFAVVVYPCLVVQYMGQAAFLSKNLGSIPNSFYDSIPNTVFWPVFVIATLAAIVGSQAVITATFSIIKQCHALGCFPRIKVVHTSKHIYGQIYIPEIN…
32	574	Dicotyledons	Brassicales	rockcress	Boechera stricta	5	BsHAK5	III	>Bostr.15697s0420 peptide: Bostr.15697s0420.1.p (PAC:30662315)	MAARVEASIGGGEIDEEGDERGSMWDLDQTLDQPMDEEAGRLRNMYREKKFSAFLLLQLSFQSLGVVYGDLGTSPLYVFYNTFPRGIKDPEDIIGALSLIIYSLTLIPLLKYVFVVCKANDNGQGGTFALYSLLCRHAKVSTIPNQHRTDEELTTYSRTTFHEHSFAAQTKRWLEKGTSRKNSLLILVLVGTCMVIGDGILTPAISVLSAAGGLRVNVPHINSGVVVVVAVVILVSLFSVQHYGTDRVGWLFAPIVFLWFLFIASIGMFNIWKHDSSVLKAFSPVYIYRYFKRGGQDRWTSLGGIMLSITGIEALFADLSHFPVSAVQFAFTVIVFPCLLLAYSGQAAYLRKYPHHVEDAFYQSIPKKVYWPMFVIATAAAIVASQATISATFSLIKQA…
32	575	Dicotyledons	Brassicales	rockcress	Boechera stricta	6	BsHAK6	I:a	>Bostr.2021s0099 peptide: Bostr.2021s0099.1.p (PAC:30676071)	MDGEEQQIDGEVNNHENKLNEKKKSWGKLFRPDSFSIEAGKTPTNTNHTSLMSWRTTLCLAFQSLGVVYGDIGTSPLYVYASTFTEGIHDKDDIIGVLSLIIYTLTLVALLKYVFIVLQANDNGEGGTFALYSLICRYAKMGLIPNQEPEDRDLSNYTLELPTTQLRRAHMIKEKLENSKFAKIILFLVTIMGTSMVIGDGILTPSISVLSAVSGIKSLGQNTVVGVSVAILILLFAFQRFGTDKVGFSFAPVILIWFTLLTGIGLFNLFKHDITVLKALNPLYIIYYFRRTGRKGWISLGGVFLCITGTEAMFADLGHFSVRAVQISFSCVAYPALVTIYCGQAAYLTKHASNVSNTFYDSIPDPIYWPTFVVAVAASIIASQAMISGAFSVISQSLR…
32	576	Dicotyledons	Brassicales	rockcress	Boechera stricta	7	BsHAK7	II:c	>Bostr.23794s0007 peptide: Bostr.23794s0007.1.p (PAC:30651338)	MNLNLGKCCGSRSSKKESWRSVLLLAYQSLGVVYGDLSISPLYVFKSTFAEDIQHSETNEEIYGVMSFVFWTLTLVPLLKYVFIVLRADDNGEGGTFALYSLICRHVKVSLLPNRQVSDEALSTYKLEHPPEKNHDSCVKRYLEKHKWLHTALLLLVLLGTCMVIGDGLLTPAISVFSAVSGLELNMSKEHHQYAVIPITCFILVCLFSLQHFGTHRVGFVFAPIVLTWLLCISGIGLYNIIQWNPHIYKALSPTYMFMFLRKTRVSGWMSLGGILLCITGAEAMFADLGHFNYAAIQIAFTFLVYPALILAYMGQAAYLSRHHHSAHAIGFYVSVPKCLHWPVLAVAILASVVGSQAIISGTFSIINQSQSLGCFPRVKVIHTSDKIHGQIYIPEINW…
32	577	Dicotyledons	Brassicales	rockcress	Boechera stricta	8	BsHAK8	III	>Bostr.23794s0596 peptide: Bostr.23794s0596.1.p (PAC:30651370)	MAARVEAATMGGEIDEEESDERGSMWDLDQKLDQSMDEEAGRLRNMYREKKFSAILLLQLSFQSLGVVYGDLGTSPLYVFYNTFPHGIKDPEDIIGALSLIIYSLTLIPLLKYVFVVCKANDNGQGGTFALYSLLCRHAKVKTIQNQHRTDEELTTYSRTTFHEHSFAAKTKRWLEKQTSRKTALLILVLVGTCMVIGDGILTPAISVLSAAGGLRVNLPHISNGVVVFVAVVILVSLFSVQHYGTDRVGWLFAPIVFLWFLSIASIGLYNIWKHDTSVLKAFSPVYIYRYFKRGGWDRWTSLGGIMLSITGIEALFADLSHFPVSAVQIAFTVIVFPCLLLAYSGQAAYIRRYPDHVADAFYRSIPGSVYWPMFIIATAAAIVASQATISATFSLVKQ…
32	578	Dicotyledons	Brassicales	rockcress	Boechera stricta	9	BsHAK9	II:c	>Bostr.2902s0221 peptide: Bostr.2902s0221.1.p (PAC:30656118)	MDLERLSPRNPVKKESWWTVLTLAYQSLGVVYGDLATSPLYVYKSTFAEDITHSETNEEIFGVLSLIFWTLTLIPLVKYVFIVLRADDNGEGGTFALYSLLCRHARISSLPNFQLADEDLSEYKKNSGENPRSLKVPGWSLKNTLEKHKVLQNMLLVLALIGTCMVIGDGVLTPAISVFSAVSGLELSMSKQQHQYVEVPVVCAILILLFSLQHYGTHRLGFVFAPIVLAWLLCISTIGVYNIFHWNPHVYKALSPYYIYKFLKKTRKRGWMSLGGILLCITGSEAMFADLGHFTQLSIQIAFTFAVYPSLMLAYMGQAAYLSKHHVQESDYRIGFYVSVPEQIRWPVLAIAILAAVVGSQAIITGTFSIIKQCTSLGCFPKVKIVHTSSRMHGQIYIP…
32	579	Dicotyledons	Brassicales	rockcress	Boechera stricta	10	BsHAK10	II:b	>Bostr.29246s0014 peptide: Bostr.29246s0014.1.p (PAC:30655715)	MTQSPSLIEQGISQQHLKTVSCANVLTLAYQSLGVIYGDLSTSPLYVYKTTFSGKLSLHENDEEIFGVFSFIFWTFTLIALFKYVFIVLSADDNGEGGTFALYSLLCRYAKLSILPNHQKMDEKLSTYATGSPGETRQSAAVKSFFEKHPKSQKFLLIFVLLGTCMAIGDSVLTPTISVLSAVSGVKLKIPDLHENYVVIIACIILVAIFSVQRYGTHRVAFIFAPISTAWLLSISCIGVYNTIKWNPHIVSALSPVYMYKFLRSTGVEGWVSLGGVVLSITGVETMFADLGHFSSLSIKVAFSFFVYPCLILAYMGEAAFLSKHHEDIQQSFYKAIPEPVFWPVFIVATFAAVVGSQAVISATFSIISQCCALDCFPRVKIIHTSSKIHGQIYIPEVN…
32	580	Dicotyledons	Brassicales	rockcress	Boechera stricta	11	BsHAK11	III	>Bostr.30275s0466 peptide: Bostr.30275s0466.1.p (PAC:30665230)	MAERVESSVPDGEQTIEERHIGAMWELEKKLDQPMDEEANKLNNMYREKGLSMLMLLRLSFQSLGIVYGDLGTSPLYVFYNTFPDGIEDKEDVIGALSLIIYSLLLIPLIKYVFIVCKANDNGQGGTLAIYSLLCRHAKVKLIPNQQRSDEDLTTYSRTVSAEGSFAAKTKKWLEGKDWRKKALLVIVLLGTCMMIGDGILTPAISVLSATGGIKVNRPNMSSDVVVLVSIVILIGLFSMQHYGTDKVGWLFAPIVLIWFLFIGATGIYNICKHDTSVLKAFSPTYIYLYFKRRGRDGWISLGGILLSITGTEALYADIAYFPLLAIQLAFTFFVLPCLLLAYCGQAAYLVNNKDHYKDAFYASIPDSVYWPMFVVATGAAIVGSQATISGTYSIVKQA…
32	581	Dicotyledons	Brassicales	rockcress	Boechera stricta	12	BsHAK12	II:a	>Bostr.7867s0162 peptide: Bostr.7867s0162.1.p (PAC:30657672)	MADRRNRCNQVLLLAYQSFGLVFGDLSISPLYVYKCTFYGGLRHHQTEDTIFGAFSLIFWTITLLSLIKYMVFVLSADDNGEGGIFALYALLCRHARFSLLPNQQAADEEISTYYGPGDASRNLPSSAFKSLIERNKRSKTALLVLVLVGTSMVITIGVLTPAISVSSSIDGLVAKTSLKHSTVVMIACALLVGLFVLQHRGTNKVAFLFAPIMILWLLIIATVGVYNIVTWNPSVYKALSPYYIYVFFRDTGIDGWLSLGGILLCITGTEAIFAELGQFTATSIRFAFCCVVYPCLVLQYMGQAAFLSKNFSALPSSFYSSIPDPFFWPVLMMAMLAAMVASQAVIFATFSIVKQCYALGCFPRVKIVHKPRWVLGQIYIPEINWVVMILTLAVTICF…
32	582	Dicotyledons	Brassicales	rockcress	Boechera stricta	13	BsHAK13	V	>Bostr.7867s1201 peptide: Bostr.7867s1201.1.p (PAC:30657611)	MFHVEEESSGGDGSEFDEEIAGDDSTTSLSRWVFDEKDDYEINEDYDDDGYDEHNYAEMDSDDEDDNVEQRLIRTTPAVDSFDVDALEIPGTQKHEIEESGIGKKLILALQTLGVVFGDIGTSPLYTFSVMFRRSPINDKEDIIGALSLVIYTLILIPLVKYVYFVLWANDDGEGGTFALYSLICRHANVSLIPNQLPSDARISGFGLKVPSPELERSLIIKERLEASMALKKLLLILVLAGTAMVIADAVVTPAMSVMSAIGGLRVGVGAIEQDQVVVISVSFLVILFSVQKYGNSKLGLVLGPALLLWFFCLAGIGIYNLVKYDSSVFKAFNPAYIYFFFKRNSVNAWYALGGCVLCATGSEAMFADLSYFSVHSVQLTFILLVLPCLLLGYLGQAA…
33	583	Dicotyledons	Brassicales		Brassica rapa	1	BrHAK1	II:b	>Brapa_Chifu-401_v1.2|Bra018342|Bra018342	MFQHLKKTVSCANVLTLAYQSLGVIYGDLSTSPLYVYKTTFSGKLSLHEDDEEIFGVFSFIFWTFTLIALFKYVFIVLSADDNGEGGTFALYSLLCRYAKLRVLPNHQEMDEKLSTYATGSPGETRQSAAAKSFFEKHPKSQKGLLIFVLLGTCMAIGDSVLTPTISVLSAVSGVKLKIPQLHENYVVIISCIILVAIFSVQRFGTHRVAFIFAPISTAWLLSISSIGVYNTIKWNPHIVSALSPVYMYKFLRNTGVEGWVSLGGVVLSITGVETMFADLGHFSSLSIKVAFSFFVYPCLILAYMGEAAFLSKHHEDIQRSFYKAIPGLAVTSVMLVTTCLMSLVMTIVWKQRTITVLAFLISFGSVELLYFSSCVYKIPEGGWIPILLSLTFMSVMYI…
33	584	Dicotyledons	Brassicales		Brassica rapa	2	BrHAK2	III	>Brapa_Chifu-401_v1.2|Bra005370|Bra005370	MGGGEIDEESDERGSMWDLDQKLDQSMDEEAGRLRNMYKEKKFSALLLLQLSFQSLGVVYGDLGTSPLYVFYNTFPHGIKDPEDIIGALSLIIYSLTLIPLLKYVFVVCKANDNGQGGTFALYSLLCRHAKVKTIRNQHRTDEELTTYSRSTFHEHSFAAKTKRWLEDRTSRKTALLVLVLVGTCMVIGDGILTPAISGNAFSLTLSILSAAGGLRVNLPHISNGVVVLVAVVILVSLFSVQHYGTDRVGWLFAPIVFLWFLSIASIGMYNIWKHDTTVLKAFSPVYIYRYFKRGGIDRWTSLGGIMLSITGIEALFADLSHFPVSAVQIAFTAIVFPCLLLAYSGQAAYIRNHPHHVADAFYRSIPGSVYWPMFIIATAAAIVASQATISATFSLIKQ…
33	585	Dicotyledons	Brassicales		Brassica rapa	3	BrHAK3	II:c	>Brapa_Chifu-401_v1.2|Bra023490|Bra023490	MDLERLSPRNQVKKESWWTVLTLAYQSLGVVYGDLATSPLYVYKSTFAEDIQHSETNEEIFGVLSLIFWTLTLIPLVKYVFIVLRADDNGEGGTFALYSLLCRHARISSLPNFQLADEDLSEYKKTSGDNPRNLKAKGWSLKNTLEKHKVLQNMLLVLALIGTCMVIGDGVLTPAISVFSAVSGLELSMSKQQHQYVEVPVVCAILILLFSLQHYGTHRLGFLFAPIVLAWLLCISTIGVYNIFHWNPHVYKALSPYYICKFLKKTGTRGWMSLGGILLCITGSEAMFADLGHFTQLSIQIAFTFAVYPSLILAYMGQAAYLSKHHVLESDYRIGFYVSVPEKIRWPVLAIAILAAVVGSQAIITGTFSIIKQCTSLGCFPKVKIVHTSSKMHGQIYIP…
33	586	Dicotyledons	Brassicales		Brassica rapa	4	BrHAK4	II:c	>Brapa_Chifu-401_v1.2|Bra007910|Bra007910	MDIESRTYQNIIKKESWRTVLTLAYQSLGVVYGDLSTSPLYVYKSTFAEDIHHTESNDEIFGVLSFIFWTITLVPLFKYVFIVLRADDNGEGGTFALYSLLCRHARVNSLPSCQLADEQLIEYNGSSSLEMAAQTGFAARLKSTLEKQRVLQKVLLVLALIGTCMVIGDGVLTPAISVFSAVSGVELSTAKEHHKYIEVPAACIILIGLAVITVMLVTTCLMSLVIVLCWHKNIFFAIAFVLFFGTIESLYFSASLIKFLEGAWVPIALSLCFLAAMCTWHYGTLKRYEFDVQNKVSVNWLLSLGQTLGIKRVRGIGLIHTELVSGVPAIFSHFVTNLPAFHQVLVFLCVKSVPVPHVRPEERFLVGRVGPKQFRMYRCIVRYGYRDVHKDDIEFEGDL…
33	587	Dicotyledons	Brassicales		Brassica rapa	5	BrHAK5	II:a	>Brapa_Chifu-401_v1.2|Bra040706|Bra040706	MEYYSGVSPPRNPSQLSWAGNLILAYQSFGVVYGDLCTSPLYVFPNTFIGKLHKQHHDEEAVFGVFSLIFWTLTLIPLLKYLLVLLNAHDNGQGGTFALYSLLCRHAKLSLLPNQQAADEELSSYKSDPSTDTATSSHFKRIFEKHKRLRTVLLLLVLSAAAMVIGNGVLTPAISVLSSMSGLQATEKISTDGELLLLACVILVGLFAFQHSGTHRVAFMFAPIVIIWLISILFIGFYNIIHWNPKIIYAISPLYIIKFFRVTGQDGWISLGGVFLSVTGTEAMFSNLGHFTSVSIRLAFAFLVYPCLVVQYMGQAAFLSKNLGSIPNSFYSSVPDPVFWPVFVIATLAAIVGSQAVITATFSIIKQCHALGCFPRVKVVHTSKHGHMYIPEINWILMI…
33	588	Dicotyledons	Brassicales		Brassica rapa	6	BrHAK6	I:a	>Brapa_Chifu-401_v1.2|Bra003195|Bra003195	MSWRTTMSLAFQSLGVVYGDIGTSPLYVYASTFTEGIHEKDDIIGVLSLIIYTLTLVALLKYVFIVLQANDNGEGGTFALYSLICRYAKTGLIPNQEPEDRELSNYTLELPNTQHRRAHKIKEKLENFKFAKITLFLVTIMGTSMVIGDGILTPSISVLSAVSGIKSLGQDTVVGVSVAILILLFAFQRFGTDKVGFSFAPIILLWFTFLTGIGLANLFKHGFTVLKALNPLYIIHYFTRNGRKGWISLGGVFLCITGTEAMFADLGHFSVRAVQAAYLTKHSSNVSNTFYDSIPDPFYWPTFVVAVAASIIASQAMISGAFSVISQSLRMGCFPRVKVVHTSAKYEGQVYIPEINYFLMLACVAVTLAFRTTEKIGHAYGIAVVTVMVITTFMVTLIM…
33	589	Dicotyledons	Brassicales		Brassica rapa	7	BrHAK7	II:c	>Brapa_Chifu-401_v1.2|Bra016225|Bra016225	MDIESRTYQNTVKKESWRTVLTLAYQSLGVVYGDLSISPLYVFKSTFAEDIEHSDSNDEIFGVLSFIFWTITLVPLFKYVFIVLRADDNGEGGTFALYSLLCRHARVNSLPSCQLADEQLTEYKTESPLEMGPRSGFAARLKSTLEKRRVLQKVLLVLALIGTCMVIGDGVLTPAISVFSAVSGVELSTAKEHHKYIEVPAACVILIGLFALQHYGTHRVGFLFAPVILLWLMCISAIGVYNIFHWNPHVYQALSPYYMYKFLKKTQSKGWMSLGGILLCITGSEAMFADLGHFSQLSIKIAFTSLVYPSLILAYMGQAAYLSQHHVIDTSYNIGFYVSVPEKLRWPVLVIAILAAVVGSQAIITGTFSIIKQCSALGCFPKVKIVHTSSKIHGQIYIP…
33	590	Dicotyledons	Brassicales		Brassica rapa	8	BrHAK8	V	>Brapa_Chifu-401_v1.2|Bra011451|Bra011451	MFSVEEGSSGGDGGSEMDDEITGDGSTSSLSRWVFDEKNDYDEDYDDDDDGYDERQHGDVDSDEEDDNVEQRLIRTSPAVDSFDVDALEIPGAQKNDIEDSSLGRKLVLALQTLGVVFGDIGTSPLYTFSVMFNRSPINDKEDVIGALSLVIYTLLLLPLVKYVFFVLWANDDGEGGTFALYSLICRHANVSLIPNQLPSDARISGFGLKVPSPELERSLIIKEKLEASMVLKKLLLILVLAGTAMVIADAVVTPAMSVMSAIGGLKVGVGAIKQDQVLVISVSFLVILFSVQKYGASKLGLALGPALLLWFFCLAGIGIYNLAKYDSSVFRAFNPAHIYFFFKRNSVNAWYALGGCVLCATGSEAMFADLSYFSVHSIQLTFTLLVLPCLLLGYLGQA…
33	591	Dicotyledons	Brassicales		Brassica rapa	9	BrHAK9	II:a	>Brapa_Chifu-401_v1.2|Bra013718|Bra013718	MADRRNRCNQVLLLAYQSFGLVFGDLSISPLYVYKCTFYGGLRHHQTEDTIFGAFSLIFWTITLLSLVKYMVFVLSADDNGEGGIFALYALLCRHARFSLLPNQQAADEEISTYYGSGDATRNLPSSAFKSLIERNKRSKTALLILVLVGTSMVITIGVLTPAISVSSSIDGLVAKTSLKHSTVVMIACALLVGLFVLQHRGTNKVAFLFAPIMILWLLSIATVGVYNIVTWNPSVYKALSPYYIYVFFRDTGVDGWLSLGGILLCITGTEAIFAELGQFTATSIRFAFCCVVYPCLVLQYMGQAAFLSKNFSALPTSFYDSIPDPFFWPVLMMAMLAAMVASQAVIFATFSIVKQCYALGCFPRVKIVHKPRWVLGQIYIPEINWVVMILTLTVTIFF…
33	592	Dicotyledons	Brassicales		Brassica rapa	10	BrHAK10	III	>Brapa_Chifu-401_v1.2|Bra013433|Bra013433	MAERVETSVPEGENTIEERHVGAMWELEQKLDQPMDEEATKLNTTPRDKLSMLMLLRLSFQSLGIVYGDLGTSPLYVFYNTFPDGIEDSEDVIGALSLIIYSLLLVPLIKYVFIVCKANDNGQGGTLAIYSLLCRHAKVSLIPNHQRSDENLTTYSRTLSTEGSFSAKTKKWLEGKHWRKRALLVIVLLGTCMTIGDGILTPAISVLSATGGIKVNNPKMSSDIVVLVAIIILIGLFSMQHYGTDKVGWLFAPIVFIWFLFIGATGIYNICKHDTSVLKAFSPTYIYLYFKRRGRDGWISLGGILLSITGTEALYADIAYFPLLAIQLAFTFFVFPCLLLAYCGQAAYLVNNKDHYQDAFYASIPGTAVVLVMLMTTLLMVLIMLLVWRCHWSLVLIFA…
33	593	Dicotyledons	Brassicales		Brassica rapa	11	BrHAK11	V	>Brapa_Chifu-401_v1.2|Bra031523|Bra031523	MDEEDRIEEASSNTSLRRVGTGSSSDRRWVDGSEVGSETLPFPEFKDVADYSFGNLRRRLMKKPKRADSLDVEAMEIAGVHGHDLKDISLLGTIGIAFQTLGVVYGDMGTSPLYVFGDVFSKVPIRSEVDVLGALSLVIYTIAVIPLAKYVFVVLKANDNGEGGTFALYSLICRYAKVNKLPNQQPADEQISSFRLKLPTPELERALGIKEALETKGYLKTLLLLLVLMGTSMIIGDGILTPAMSVMSAMSGLQGEVEGFGTNALVLSSIVILVALFSIQRFGTGKVGFLFAPVLALWFFSLGSIGIYNLLKYDITVIRALNPYYIVLFFNKNSKQAWSALGGCVLCITGAEAMFADLGHFSVRSIQMAFTCVVFPCLLLAYMGQAAYLTQHPDASARI…
33	594	Dicotyledons	Brassicales		Brassica rapa	12	BrHAK12	V	>Brapa_Chifu-401_v1.2|Bra006020|Bra006020	MAEESSFDGSEKEEIASSGNGFGDLASMDSIESRWVTQDEDDDSVNGADDDDDDDDDEFYGTGLESEDEEVSEHRLLIRTGRRVDSFDVEALEVPGASRIDYEDLTVGRRVLLAFQTLGVVFGDVGTSPLYTFSVMFSKSPVKEKEDVIGALSLVLYTLLLIPLIKYVLVVLWANDDGEGGTFALYSLISRHAKISLIPNQLRSDTRISSFRLKVPCPELERSLNLKEKLENSLVLKKMLLVLVLAGTAMVIADGVVTPAMSVMSAVGGLKVGVDAVEQDQVVMISVAFLVILFSLQKYGTSKMGLVVGPALLLWFCCLAGIGIHNLLKYDKSVYRAFNPIHIYYFFQRNSINAWYALGGCILCATGSEALFADLCYFSVRSVQLTFVCLVLPCLMLGY…
33	595	Dicotyledons	Brassicales		Brassica rapa	13	BrHAK13	III	>Brapa_Chifu-401_v1.2|Bra012528|Bra012528	MSERVEASVAEGENTIEERHIGAMWELEQKLDQSMDEEANKIKIMYREKYVFTVCKANDNGQGGTLAIYSLLCRHAKVNLIPNQQRSDEDLTTYSRTLVAEGSFAAKTKKWLESKESRKRALLFVVLLGTCMMIGDGILTPAISVLSATGGIKVSSPKMSSDIVVVMSIVILVGLFSMQHYGTDKVGWLFAPIVFIWFLFIGATGIYNIFKHDTRVLKAFSPTYVYLYFKRRGRDGWISLGGILLSITGTEALYADIAYFPLLAIQLAFTFFVFPCLLLSYCGQAAYLVNNKDHYDDAFYASIPRTAVVLVMLVTTLLMVLTMLLVWRCHWILVLIFAFLSLVVELSYFSAVLLKVNQGGWVPLIIAAISLLVMSVWQYATVKKYEFEMHSKVSMSWIL…
33	596	Dicotyledons	Brassicales		Brassica rapa	14	BrHAK14	II:a	>Brapa_Chifu-401_v1.2|Bra012525|Bra012525	MAGRVEASLTEGESTIEERDREAMREFEEGLDQPMDEEANMLKNMNKEKGLSMLMLLRLSFQSLGIVYGDLGTSPLYVFYNTFPNGIDDSEDVIGALSLIIYSLLLIPLIKYVLIVCKANDNGQVLSATGGIKVNNPKMSSVKKYEFEVHSRVSMSWILGLGPSLGLVRVPGIGLVHTELASGVPHIFSHFITNLPAIHSVVVFVCVKNLLVYTVPEEERFLVKRIGPKTFRMFRCVARYGYKDLHRKDDRFEDKLFENLFSFIQNETMMESDSNYSNSVYPVNYTQESRDELISNNNNNHDSIDNNMVMFSSMVDYMDTMSFSQNITVEEEEEEEDELEFLKTCKESGVVHIMGNTVVKARKGSLLPKKIAIDYVYAFLAKICRENSAILHVPHETLL…
33	597	Dicotyledons	Brassicales		Brassica rapa	15	BrHAK15	III	>Brapa_Chifu-401_v1.2|Bra012526|Bra012526	MAERVEASVTDGESTIEERDRELMREFEERLDQPMDEEANMLKDMNKEKGLSTLMLLRLSFQSLGIVYGDLGTSPLYVFYNTFPDGIKDSEDVIGALSLIIYSLLLIPLIKYVFIVCKANDNGQGNQTGLVYILINECLCAGGTLAIYSLLCRHAKVNLIPNQQRSDEDLTTYSRTLVAEGSFAAKTKKWLESRHSKKRALLVVVLLGTCMMIGDGILTPAISVLSATGGIRVNNPKMSSDIVVLVSVILLIGLFSMQHYGTDKVGWLFAPIVLIWFLFIGATGIYNICKHDTSVLKAFSPKYIYLYFKRRGRDGWISLGGILLSITGTEALFADISYFPLQAIQLAFTLFVFPCLLLAYCGQAAFLVNHKEHYKDAFYASIPGTAVVVVMLVTTLLMV…
33	598	Dicotyledons	Brassicales		Brassica rapa	16	BrHAK16	II:b	>Brapa_Chifu-401_v1.2|Bra022776|Bra022776	MNQSPTVIEQGISRQHLKTVSCANVLTLAYQSLGVIYGDLSTSPLYVYKTTFSGKLSLHEDDEEIFGVFSFIFWTFTLIALFKYVFIVLSADDNGEGGTFALYSLLCRYAKLSVLPNHQEMDEKLSTYATGSPGETSQSAAVKSFFETHPKSQKCLLIFVLLGTCMAIGDSVLTPTISVLSAVSGVKLKIPELHENYVVIISCIILVAIFSVQRYGTHRVAFIFAPISTAWLLSISSIGVYNTIKWNPRIVSALSPVYMYKFLRSTGVEGWVSLGGVVLSITGVETMFADLGHFSSLSIKVAFSFFVYPCLILAYMGEAAFLSKHHEDIQRSFYKAIPGLAVTSVMLVTTCLMTLVMTIVWKQRTITVLAFLLCFGSIELLYFTSCVYKIPEGGWIPIL…
33	599	Dicotyledons	Brassicales		Brassica rapa	17	BrHAK17	II:c	>Brapa_Chifu-401_v1.2|Bra016986|Bra016986	MDLNFGKCCGSKKKESWRSVMLLAYQSLGVVYGDLSISPLYVFKSTFAEDIRHSETNEEIFGVLSFVFWTLTLVPLLKYVFIVLRADDNGEGGTFALYSLICRHVKVSLLPNRQVADEALSTYKLEHPPEKNHDSCVKRYLEKHKWLHTALLLLVLLGTCMVIGDGLLTPAISVFSAVSGLEMNMSKEHHQYAVIPITCFILICLFALQHFGTHRVGFVFAPIVLTWLLTISGIGLYNIIQWNPHVYKALSPKYMFMFLRKTRVSGWMSLGGILLCITGAEAMFADLGHFNYAAIQASFYFGLNAFTQCSKNRSRRCLDIAFTFLVYPALILAYMGQAAYLSQHHNSAHAIGFYISVPKCVHWPVLMIAILASVVGSQAIISGTFSIINQSQSLGCFPR…
33	600	Dicotyledons	Brassicales		Brassica rapa	18	BrHAK18	III	>Brapa_Chifu-401_v1.2|Bra020940|Bra020940	MPERVEGSVAEGENTIEERHVGAMWELEQKLDQPMDEEANKLKNMYREKVFTFSIQEFNSNGYSVSVGLSMLMLLRLSFQSLGIVYGDLGTSPLYVFYNTFPDGISDSEDVIGALSLIIYSLLLIPLIKYVIIVCKANDNGQGGTLAIYSLLCRHAKVKLIPNQQRSDEDLTTYSRTLLPEGSFAAKTKKWLESKESRKRALLFIVLLGTCMMIGDGILTPAISVLSATGGIKVISPKMSSDVVVLVSIIILIVLFSMQHYGTDKVGWLFAPIVFIWFLFIGATGMYNICKHDTSVLKAFSPTYIYLYFKRRGLDGWISLGGILLSITGTEALYADIAYFPLLAIQLAFTFFVFPCLLLAYCGQAAYLVNNKDHYKDAFYASMPGTAVVLVMLATTLLM…
33	601	Dicotyledons	Brassicales		Brassica rapa	19	BrHAK19	III	>Brapa_Chifu-401_v1.2|Bra038410|Bra038410	MAARGVEGSTGGEISEESDERGSMWDLDQQLDQPMDEEAGRLRNMYKEKKFSAFLLLQLSFQSLGVVYGDLGTSPLYVFYNTFPHGIKDPEDIIGALSLIIYSLTLIPLLKYVFVVCKANDNGQGGTFALYSLLCRHAKVNTIPNQHRTDEELTTYSRTTFHEQSFAAQTKRWLEKNASRKNSLLILVLVGTCMVIGDGILTPAISVLSAAGGLRVNLPHINNGVVVVVAVVILVSLFSVQHYGTDRVGWLFAPVVFLWFLFIASIGMYNVCKHDPSVLKAFSPVYIYRYFKRGGQDRWTSLGGIMLSITGIEALFADLSHFPVSAVQIAFTVIVFPCLLLAYSGQAAYLRKYPHHVEDAFYQSIPKSVYWPMFVIATFAAIVASQATISATFSLIKQA…
34	602	Dicotyledons	Ranunculales	Columbine	Aquilegia coerulea	1	AcHAK1	II:c	>Acoerulea|Aquca_005_00151|Aquca_005_00151.1	MDLDSSRCWNSAKKESWKTTLLIAYQSLGVVYGDLSISPLYVFKSTFAEDIHHSETNEEIYGVLSFVFWTLTLVPLFKYVFVVLRAHDNGEGGTFALYSLICRHVKVSLLPNSQLADEALSTYKVESPMETKHSSRLKTLLEKHKSLHTALLILVLLGTCMVIGDGVLTPAISVFSAVSGLELSMSKEHHLYAVVPITCVIIVCLFALQHYGTHRIGFFFAPIVLTWLICISGLGVYNIIHWNPHVYQALSPYYMYTFLKKTKKSGWMSLGGILLCITGSEAMFADLGHFSYTAIQITFTFLVYPALILAYMGQAAYLSKHHVLHSTYQVGFYASVPECVRWPVLVVAILASVVGSQAIISGTFSIINQSQSLGCFPRVKVVHTSDKIHGQIYIPEINW…
34	603	Dicotyledons	Ranunculales	Columbine	Aquilegia coerulea	2	AcHAK2	II:b	>Acoerulea|Aquca_045_00167|Aquca_045_00167.1	MNPTTSVETVEQGFSPQSLKKLPYSTVLTLAYQSLGVVYGDLSTSPLYVYKTAFSGKLSLHENDEEVYGVLSFIFWTLTLIPLFKYIFIVMSADDNGEGGIFALYSLLCRHARLSILPNQQASDENLSAYGMEGSADTWQSSALKSFFEKHPNYRNGLLVFVLLGTCMAIGDGVLTPAISVLSAVSGIRVKVTDLHQNYVVVISCVILVGLFSLQHHGTHKVAFLFAPIVTAWLLCISAIGIYNIIQWNPCIYRALSPFYMFRFLRSTGVEGWVSLGGVVLAITGAETMFADLGHFSPLSIKITFTFLVYPCLVLAYMGEAAFLSRHHEDIQRSFYKAIPEPVFWPVFIIATMAAVVGSQAVISATFSMVGQCCALNCFPRVKIVHTSKKIYGQIYIPE…
34	604	Dicotyledons	Ranunculales	Columbine	Aquilegia coerulea	3	AcHAK3	IV	>Acoerulea|Aquca_017_00008|Aquca_017_00008.1	MEEDDHHEDLESRNNNFTEAYRIKSRQPEIGYSFAATLALAYQSLGVVYGDLGTSPLYVFSSVSLSDPGEDDILGILSLIFWTLTSIGVIKYIVIVLRADDHGEGGTFALYSLLCRHINFQGKIGIQSTRLASDLNLKFYSSKTALLQSKTKEFFENSSRAQSVFTFIVLLATCMVIGDGALTPAISVVSAVQGIQSRSEEITQNYVVIISVVILLLVFLFQRFGTDKVSFIFSPVMLLWFMSIAAIGIYNTIKYYPSVFKFISPYYIYLFFKRNGKEGWERLGAVAMCITGAEAIFADLGHFNKRSIQIAFSFLVYPALIITYGGQGAFLIKNPDKISTAFYSSLPTPVFWPMFVIATLAAIVASQALISASFSIIKQSLVLGCFPRVNIIHTSNKHE…
34	605	Dicotyledons	Ranunculales	Columbine	Aquilegia coerulea	4	AcHAK4	II:b	>Acoerulea|Aquca_042_00047|Aquca_042_00047.1	MALEAASCQSHESRWTVYATTLSLAYQSFGVVFGDLSISPIYVYSSTFSGRLRLHEDDAEILGVLSMIFWTLTLIPFCKYVIFVMGADDNGEGGTFALYSLLCRRSNMGLLNNSLAAEEHISVSKSKNILKETRTNLFIKYFFQKYRSSRFVLLLVVLLGTSMVIGDGVLTPTMSVLSAVNGLKAKVPHLHEMGLFAIQHYGTHRIGCLFAPISICWLLCIGGIGIYNLMIWNPRFIRALSPSYAYNFLRTAGAEAMFADLGHFSLLSIRIAFAGVVYPCIVLAYMGQAAYLSQNKEDLQRSFYNAIPKPIFWPVFIIATLATIVGSQAIISATFSIISQCRTLRCFPRVKIIHTSNQVHGQIYIPEVNWILMALCLTVVIGLGDTEVIGNAYGLAVIT…
34	606	Dicotyledons	Ranunculales	Columbine	Aquilegia coerulea	5	AcHAK5	III	>Acoerulea|Aquca_030_00338|Aquca_030_00338.4	MASTPTIDEENGNKGSMWVLDQKLDQPMEEEAGRLKNMYREKTFSSLLVLRLAFQSLGVVYGDLGTSPLYVFYNTFPNGIKDQEEVIGALSMIIYSLTLIPLLKYVFLVLRANDNGQGGTFALYSLLCRHAKIKTIPNQHRTDEELTTYSRHIFHEKSFAAKTKRWLEARIYRKNALLILVLVGTCMVIGDGILTPAISVLSAAGGIKVAHPKMSSDVVVIVAVIILVGLFSMQHYGTDKVGWLFAPVVLLWFLLIGGIGAFNIWKYGHTVLKAFSPVYVYRFFKRGGWNSLGGIMLSITGTEALFADLGHFPVSAVQIAFTVVVFPCLLLAYIGQAAYIMKNQDHVIDAFYRSIPKGVYWPMFVVATAAAIVASQATISATFSIIKQANALGCFPRVK…
34	607	Dicotyledons	Ranunculales	Columbine	Aquilegia coerulea	6	AcHAK6	I:a	>Acoerulea|Aquca_011_00472|Aquca_011_00472.1	MTDSVHVLKERKVSCATLRRVDSLNLEAGIVSNVSSHNVKVGLKTTLFLAFQSIGVIYGDIGTSPLYVFASTFPNGIKNNNDILGVLSLIIYTILLSPMIKYMFVVLKANDNGDGGTFALYSKICRYAKISLIPNQQAEDTELSNYRMELPSNQSRRAQKIKDKLENSHVAKLFLLLITILGVSLVIGDGILTPCISVLSAVSGLKRSAKSLNQDAIVGISVAILILLFSVQRFGTDKVGYSFAPIIFLWFSFISGIGLYNLFKYDFGVLRAFNPIYIIDYFKRNGKEAWISLGGVVLCITGTEAMFADLGHFSVRSVQISFTGIVFPAILCAYSGQAAYLTEFPHHVHDTFYESIPDPIYWPTFVVAVCASIIASQAMISGAFAIISQSLRLGCFPRV…
34	608	Dicotyledons	Ranunculales	Columbine	Aquilegia coerulea	7	AcHAK7	I:a	>Acoerulea|Aquca_011_00474|Aquca_011_00474.1	MADPVEKNNTDGEKEETEFTDAEHTLKDRKASWAKLRRVDSLNLEAGIVSNVPSHAAQIGIKSTLFLAFQSIGIIYGDIGTSPLYVFSSTFPNGIKDNEDILGVLSLIIYTILLSPVLKYMFVVLNANDNGDGGTFALYSKICRYAKISLIPNQQAEDRELSNYRLDIPSNQLRRAQKIKEKLENSHVAKIVLLFITILGVSLVIGDGILTPCISVLSAVSGIKRSADSLNQNAIVGISVAILIVLFSVQRFGTDKVGYSFAPIICLWFTFISGIGLYNLFKYDVSVLRAFNPKYIIDYFKRNGKEAWISLGGVVLSMTGTEAMFADLGHFSVRSVQISFMGVVCPAILCAYSGQAAYLTKFPTHVYETFYDSIPDPLYWPTFVIAVCASIIASQAMIS…
34	609	Dicotyledons	Ranunculales	Columbine	Aquilegia coerulea	8	AcHAK8	IV	>Acoerulea|Aquca_001_00253|Aquca_001_00253.1	MSSKQHQELHSNVLDSRRSTCRAVCIPLCTPDGIYSSANKGFVATQLMADHHEIEEVDLEAAYNQEDNADHHEEEEDLESADNNNHRLDLESRTKFSHSSEVVYPFVATLVLAYQSLGVVYGDIGTSPLYVFSSLSLKNPGEDDILGILSLIFWTLTSIGVIKYIAIVLRADDHGEGGTFALYSLLCQHINFQGTVGIQITRLESDKNLKFYSSKTAALQSTTKAFFENSSRAQSVFIYIVLLGTCMVIGDGALTPAISVVSAVQGIQSRSDKITQNHVVIISVVILLMLFFFQRFGTTKVSFVFSPIMLLWFASTASIGIYNTIKYYPSIFKFISPHYIYYYFKRNGKEGWKQLGAVAMCITGAEAMFADLGHFDKRSIQVAFSFLVYPALIITYGGE…
34	610	Dicotyledons	Ranunculales	Columbine	Aquilegia coerulea	9	AcHAK9	IV	>Acoerulea|Aquca_002_00839|Aquca_002_00839.1	MDNQLITSSPPIPLSEIVVEDNNHNNNNNNNNNNSLLNGHHSHTTFTFSINENTNGKDGFWRNVFLAYKTLGVVFGGLVTSPLYVYPSMHLTSPSEDDYLGIYSIMFWTLTLIGVVKYCCIALKADDQGEGGTFALYSLLCRHANISILSSKRTDTDSGVQNANQYGGTKKKSRLVTFFEQSLVARRVLLFVAMLGMCMLIGDGILTPAVSVLSAMDGLRGPFPSASKSLVVALSAIVLIALFLVQKFGTSKVSFLFSPIMGAWTLTTPIVGIYSIFRHYPSIFKALSPHYILHFFLRNGKEGWALLGGTVLCITGSEALFADLGHFNRRSIQLAFLFTIYPSLILTYAGQTAYLIKHPNDHDDGFYKFIPHTVYWPMFIVATLAATVASQSLISATFS…
34	611	Dicotyledons	Ranunculales	Columbine	Aquilegia coerulea	10	AcHAK10	V	>Acoerulea|Aquca_002_00246|Aquca_002_00246.1	MEGGGSGDEESVKLVRSESRWVDGSEVDSESPPWSVVDGEDYQGRHVSSSSLRRRLVKKPKRVDSFDVEAMENYNAHHHSKDVSIWRTLSMAFQTLGVVYGDLGTSPLYVFTDVFSKVPIRSEVDVLGALSLVMYTIALIPFAKYVFIVLKANDNGEGGTFALYSLICRYAKVNLLPNQQQADEYISSFKLKLPTPELERALNIKDTLERKSSLKTLLLLLVLMGTSMIIGDGILTPAMSVMSAVSGLQGKIPGFDTNAVVIVSIVILIALFSIQRFGTSKVGLSFAPVLALWFFCLGSIGIYNIFKHDITVLRAFNPAYIYFFFKRNTAKAWSALGGCVLCVTGAEAMFADLGHFSVLSIQVAFTCVVFPCLLLGYMGQAAYLMKHPSSAERIFYDSI…
34	612	Dicotyledons	Ranunculales	Columbine	Aquilegia coerulea	11	AcHAK11	II:c	>Acoerulea|Aquca_002_00247|Aquca_002_00247.1	MDPELGVYRNPVKKESWKTVLTLAYQSLGVVYGDLSTSPLYVYKSTFADDIVHSTTNEEIYGVLSFVFWTLTLIPLLKYVFIVLKADDNGEGGTFALYSKLCRHAKVSFLPNSQSADEELSNYKKDGVDLLGTGTSIGSRLKLTLEKHRVLQKVLLVLALIGTCMVIGDGVLTPAISVFSAVSGLELQMAKEHHKYVEVPVACLVLVGLFSLQHYGTHRIGFMFAPIVILWLFCISAIGIYNILHWNPHVYKALSPYYMYIFLKKTQTRGWMSLGGVLLCITGSEAMFADLGHFSQLSIQFAFTFVVYPSLILAYMGQAAYLSKHHIHDNDYRIGFYVSVPEKIRWPVLAIAILAAVVGSQAIITGTFSIIKQCSALSCFPRVKIVHTSSKMHGQIYIP…
34	613	Dicotyledons	Ranunculales	Columbine	Aquilegia coerulea	12	AcHAK12	I:a	>Acoerulea|Aquca_055_00079|Aquca_055_00079.1	MANPEVDSLNLEAGMVSNLPNHSQMGFKATLILAFQSIGVIYGDIGTSPLYTLSGTFPNGMKNAEDMLGVLSLIYYTLLLSPVIKYMFVVLNANDNGDGGTFALYSKICRYARISLVPNQQAEDRELSNYTLVIPSDQSRAQKIREKLEHSKVAKMVLFLITILGVSLVIGDGVMTPCISVLSAVGGIKRSAKFLNQDAIVGISVTILIILFSVQRFGTDKVGYSFAPILCLWFCFNIGIGLYNVFTYDIGILRALNPKYIINYFERNGKDAWISLGGVILCITGTEAMFADLGHFSVRSVQISFMGVVFPSIICAYSGQAAYLYKNPTGVTDAFYASVPDALYWPTFVVAVCASIIASQAMISGAFAIISQSLRLGCFPPVKVVHTSAKYEGQVYIPE…
34	614	Dicotyledons	Ranunculales	Columbine	Aquilegia coerulea	13	AcHAK13	II:a	>Acoerulea|Aquca_022_00028|Aquca_022_00028.1	MDSEAGASSTSPQTPSSSSSNSNKLSWGNISRNLILAYQSFGVVYGDLSTSPLYVFTSTFEGKLQAHQNEDAIFGAFSLIFWTITLIPLLKYVFILLSADDNGEGGTFALYSLLCRHARLSLLPNQQAADEELSAYKYGPSTPVASSSLKRFLEKHKRLRTALLLVVLFGACMVIGDGVLTPAISVLSSVSGLQVTQPKLNDRAVIFLACVILVGLFALQHIGTHRVAFMFAPIVIIWLVTIFVLGLYNTIYWNPKILSALSPHYVIKFFRNTGKDGWISLGGILLAITGTEAMFADLGHFTALSIRLAFAFVIYPCLVVQYMGQAAFLSKNLSSIHRSFYDSIPDKVFWPVFVIATLAAIVGSQAVITATFSIIKQCHALGCFPRVKVVHTSRHIYGQ…
34	615	Dicotyledons	Ranunculales	Columbine	Aquilegia coerulea	14	AcHAK14	II:a	>Acoerulea|Aquca_013_00170|Aquca_013_00170.1	TSPLYVYKSTFSGRLLHHQSENTVFGVLSVIFWTLTLIPLLKYVYIVLSADDNGEGGVFALYSLLCRHAKLGLLPNQQAADEELSTYYNKDYLNKHSDGSPLRKWLEKHKRMRTSLLLVVLFGACMFIGDGVLTPAISVLSSISGLQVRANKLQDGVVVVIACIVLVGLFALQHVGTRKVAFMFAPIVILWLLCIAAIGIYNIVVWNPRIYKALSPYYIYLFFRETGKDGWISLGGILLCITGTEAMFADLGHFTSVSIRVAFSCVVYPCLVLQYMGQAAFISKNLATIPTSFYASIPKPVFWPVFVVASLAAIVASQAVISATFSIVKQCHALGCFPRVKVVHTSRWIYGQIYIPEINWILMVLCLAVTVGLQDTTLIGNAYGIACMAVMYVTTWLMA…
34	616	Dicotyledons	Ranunculales	Columbine	Aquilegia coerulea	15	AcHAK15	V	>Acoerulea|Aquca_008_00141|Aquca_008_00141.1	MAEETSERGENGGLIAMDSSESRWVFQRDYDDSDFDDDDDDDNNEDLPVRMSIDSEDDDNAEQKLIRTGPRIDSFDVEALEVPGAHRNDYEDFTAGRTILLACQTLGVVFGDVGISPLYTFSVMFSKSPIQGKEDVLGALSLVIYTLILIPLIKYVFIVIWANDDGEGGTFALYSLICRHARVSLLPNQLPSDTRISSFRLKVPSPELERSLKIKERLETSLTLKKLLLMLVLVGTSMVIADGVVTPAMSVMSAVNGLTVGIAAVEQDEVMMISAALLVVLFSVQKYGTSKVGLAVGPSLLIWFCCLAGIGIYNLIKFDTGVLRAFNPVHIYYYFERNSMQAWLSLGGCLLCATGSEAMFADLCYFPVRFVQFTFVFLVLPCLLLGYLGQAAYLMENLD…
34	617	Dicotyledons	Ranunculales	Columbine	Aquilegia coerulea	16	AcHAK16	IV	>Acoerulea|Aquca_039_00071|Aquca_039_00071.1	MNEDDDHNHKNLEASSRTSSFVEVYKIPSRKSEIRYSLTATLALAYQSLGVVYGDLGTSPLYVFSSVSLSDPGEDDILGILSLIFWTITSIAVIKYISIVLRADDHGEGGTFALYSLLCRHINFQGKIGIQNTRLASDLNLKFYSSRTTALQSKTKEFFENSPRAQSIFIFIVLLATCMVIGDGALTPAISVVSAVQGIQSRSEKITQNYVVIISVVILLLVFLFQRFGTDKVSFIFSPIMLLWFTSTASIGIYNTIKYYPSVFKFISPYYIYYFFKKHGKEGWERLGAVAMCITGAEAIFADLGHFNKRSIQIAFSFLVYPALIITYGGQGAFLIKNPDKISTTFYSSVPRAVFWPVFVIATLAAVVASQALISASFSIIKQSLALGCFPRVNIIHTS…
34	618	Dicotyledons	Ranunculales	Columbine	Aquilegia coerulea	17	AcHAK17	II:c	>Acoerulea|Aquca_025_00277|Aquca_025_00277.1	MDLEGGVYRKPVKKESWKNVLILAYQSLGVVYGDLSTSPLYVYKSTFAEDITHSETNEEIYGVLSFVFWTLTLVPLLKYVFIVLRADDNGEGGTFALYSLLCRHAKISFMPNCQVADEELSAYKKDHIGLPDTTKGSRLKSTLEKHRVLQKMLLVLALIGTCMVIGDGVLTPAISVFSAVSGLELSMSKEHHKYVELPVACFILVCLFALQHYGTHRVGFLFAPIVVTWLLCISSIGVYNIIHWNPHVYQALSPYYMYKFLKKTQRGGWMSLGGILLCITGSEAMFADLGHFSQSSIKIAFTSVVYPSLILAYMGQAAYLSKHHIIESNYQIGFYVSVPERLRWPVLAIAILAAVVGSQAIITGTFSIIKQCSALGCFPRVKIIHTSSKMHGQIYIPEI…
35	619	Monocotyledons	Zingiberales	Banana	Musa acuminata	1	MaHAK1	V	GSMUA_Achr7P20060_001 Potassium transporter 23 ~gene ~complete 668 0.0	MEEGGIVEEASSARTVRWVDGSEVDSESPPWSIEEEALVLGPELQATLRRRLVKKARSVDSLDVEAMDIADAHKRREKDISIWSTVAMAFQTLGVVYGDMGTSPLYVFSDVFSKVPIKSEVDVLGALSLVMYTIALIPFAKYIFIVLKANDNGEGGTFALYSLICRYAKVSLLPNQQRADEDISSFRLKLPTPELERALYIKELLEKNSFSKRLLLLLVLMGTSMIIGDGILTPSMSVMSAVSGLQGRISGFDTDAVVIFSIVILVVLFSIQRFGTGKVGFLFAPILALWFFSLGSIGIYNILKYDISVLRAFNPAYIYFFFKRNSTKAWSALGGCVLCITGAEAMFADLGHFSVKSIQIAFTSTVFPCLLLAYMGQAAYLMKHPFSVEGIFYDSVPDI…
35	620	Monocotyledons	Zingiberales	Banana	Musa acuminata	2	MaHAK2	I	GSMUA_Achr10P17070_001 Putative Potassium transporter 5 ~gene ~c... 637 0.0	MVSKEEEQEREDGEGVEEAQQTVTKNLNRMDSLEMEAGKISVMRGTSKVLSTAALMQLAFQSIGVVYGDIGTSPLYVFASTFSDRVPSKHDIVGALSLIIYSLTLLPLIKYVFIVLRANDNGEGGGTFAMYSLICRHAKNSSWAKTILLSLTLFGTCMVVGDGILTPCISVLSAVDGIKKMDAALSKDVVALISVAVLVLLFSVQRFGTDKVGYTFAPAILFWCLFIGIIGISNLIRHDSTVVRAFNPIYISSYLKRNPKEAWISLGGVVLCITGTEAMFADLGHFSVRAIQVAFTGLVYPCLLCAYLGQAAYLSNFPDHVADAFYKSTPESVYWPMFVIAVLASIIASQAMISATFAIVKQSMALGCFPRVRVVHTSHKHGGQVYIPEINFLLMFACF…
35	621	Monocotyledons	Zingiberales	Banana	Musa acuminata	3	MaHAK3	III	GSMUA_Achr11P18160_001 Putative potassium transporter 12 ~gene ~... 629 e-180	MLALSRFVSFRTGTLRSCAEIGAVPMASGSVDEEMNKGSMWELDQNLDQPMDEEAGRLRNMYREKKFSAILVMRLAFQSLGVVFGDLGTSPLYVFYNTFPRGVEDAEDVIGALSLIIYSLTLIPLLKYVFVVLRANDNGQGGTFALYSLLCRHAKVNTIPNQHRTDEQLTTYSRHTYAENSLAAKVKRWLESHAYKKNALLILVLVGTCMAIGDGILTPVISVLSASGGIKFDHPKMSNDIAVLFAVVILVGLFSMQHYGVDKVGWLFAPIVLLWFLLIGAIGAVNIWKHDSSVLKAFNPVYIYRYFRRGKRESWMSLGGILLSITGTEALFADLCHFPVLAVQIAFTLIVFPCLLLAYTGQAAYLVHNTEHVSDAFYRSIPDGIYWPMFIIATAAAIV…
35	622	Monocotyledons	Zingiberales	Banana	Musa acuminata	4	MaHAK4	II:a	GSMUA_Achr11P20420_001 Probable potassium transporter 2 ~gene ~c... 609 e-174	MVSLLGSIVNHFSLLQVSWRSNCKHLLLLAYQSLGVVYGDLSTSPIYVYTSSFSGRLSLYQDEQTVFGMFSLIFWTFTIIPLLKYVIIVLGADDNGEGGTFALYSLLCRHAKLSLLPNQQSADEELSTYYRNGYISQNTIHSPLKRFLEKHKRLRTCLLLIVLFGACMVIGDGVLTPAISVLSSISGLRVRAKGLLDGEVLVISCVVLVGLFALQHKGTQRVAFVFAPVVIIWLLCIAAIGLYNTIYWNPRIFHALSPHYIVKFFEHTGKDGWISLGGILLSITGTEAMFADLGHFNEASIRVAFISVIYPCLILQYMGQAAFLSKNISDVSISFFGSIPEPVFWPVFVISTLAAIVASQSVISATFSIVKQCHSLGCFPRVKIVHTSRWVNGQIYIPE…
35	623	Monocotyledons	Zingiberales	Banana	Musa acuminata	5	MaHAK5	III	GSMUA_Achr5P00220_001 Putative potassium transporter 12 ~gene ~c... 599 e-171	MWELDQNLDQPMDEEAGRLRNMYREKKFSSILVMRLAFQSLGVVFGDLGTSPLYVFYNTFPHGVEDAEDIIGALSLIIYSLTLIPLLKYVFVVLRANDNGQVIDNLQTESEHLIILCGTFALYSLLCRHAKVNTIPNQHRTDEQLTTYSRQTYDENSLSGKVKRWLESHAYKKNALLILVLVGTCMAIGDGILTPVISVLSASGGIKVDHPKMSNDVVVLVAVVILVGLFSMQHYGTDKVGWLFAPIVLLWFLLIGVIGALNIWKYDSSVLKAFSPVYIYRYIRRGKRDSWVSLGGILLSITGTEALFADLCHFPVLAVQIAFTTIVFPCLLLAYTGQAAYIVCNTGHVSDAFYRSIPDGIYWPMFIIATAAAIVASQATISATFSIIKQALALGCFPR…
35	624	Monocotyledons	Zingiberales	Banana	Musa acuminata	6	MaHAK6	II:a	GSMUA_Achr8P10010_001 Potassium transporter 7 ~gene ~complete 589 e-168	MNVDHYLCLQVNWKSDYKRLLLLAYQSFGVVYGDLSTSPIYVYASCFAGRLNNYRDEQTVFGVFSLIFWTFTLIPLLKYVMIVLGADDNGEGGTFALYSLLCRHAKLSLLPNQQAADEELSTYYRAGYIPQIAIYSPLKRFLEKHKRLRTCLLLIVLFGACMVIGDGVLTPAISVLSSISGLQVRAKKLVDGMCCEVVIISCVVLVGLFALQHKGTQRVAFMFAPVVIIWLLFIAAIGLYNTIYWNPRIIHALSPHYIVKFFEHTGKDGWISLGGILLSVTGTEAMFADLGHFNETSIRIAFVGLIYPCLVLQYMGQAAFLSKNIHDVSSSFFESIPQSVFWPVFVISSLAAIVASQSVISATFSIVKQCHSLGCFPRVKIVHTSRWIHGRIYIPEINW…
35	625	Monocotyledons	Zingiberales	Banana	Musa acuminata	7	MaHAK7	V	GSMUA_Achr9P11540_001 Probable potassium transporter 14 ~gene ~c... 583 e-166	MDSTESRWAARDQEDSEDDSEEEGEESSRRMSLDSEEEEDNVEQRLIRTGPRIDSFDVEALEVPGAHRNDFEDVSLGRRIVLALQTLGVVFGDVGTSPLYTFDVMFNKYPLIEKEDVLGALSLVLYTLILIPLVKYTLVVLWANDDGEGGTFALYSLICRNAKASLLPNQLPSDARISSFRLKVPSAELERSLKLKEYLENSLTLKKLLLILVLFGTSMVIADGVVTPAMSVMSAFNGLKVGISSVEQDEVVMISIASLIVLFSVQRFGTSKVGLLVGPALFIWFCSLGVVGICNLLKYGTYVLRAFSPVYIYYFFKRNPTQAWMSLGGCLLCATGSEAMFADLCYFSVRSVQLTFVFLVLPCLLLGYLGQAAFLMENLTEKQQVFFSSIPSGAFWPVF…
35	626	Monocotyledons	Zingiberales	Banana	Musa acuminata	8	MaHAK8	II:C	GSMUA_Achr8P01760_001 Potassium transporter 2 ~gene ~complete 579 e-165	MDPEVGRIPVSLKVWWPFHFINLYLLSYSSFLATLIVLLIDLVGLQKDSWKTILLLAFQSLGVVYGDLSISPLYVFKSTFAEDIQHSETNEEIFGALSFVFWTLTLVPLFKYVFIVLRADDNGEGGTFALYSLICRHANVSLLPNRQVADEELSTYKYECPPEITNRSRIKVWLEKHKNLHVALLIVVMLGTCMVIGDGILTPAISVFSAVSGLELSMSKEHHEYAVVPITCFILVCLFALQHYGTHRVGILFAPVVLTWLLCISGLGIYNIVHWNPHVYQALSPYYMFKFLKKTKKGGWMSLGGILLCITGSEAMFADLGHFSYTAIQMAFTFVVYPSLILAYMGQAAYLSKHHGIYTSYQIGFYASVPECLRWPVLGIAILASVVGSQAIISGTFSI…
35	627	Monocotyledons	Zingiberales	Banana	Musa acuminata	9	MaHAK9	III	GSMUA_Achr8P33490_001 Putative potassium transporter 12 ~gene ~c... 575 e-164	MASVPVNVESKGSMWDLDHNLDQPMDEEAGRLRNMYQEKKFSAILVLRLAFQSLGVVFGDLGTSPLYVFHNTFPSRVEDSEDVVGALSLIIYSLTLVPLLKYVFVVLRANDNGQGGTFALYSLLCRHAKIITLPNQHRTDEQLTTYSRHTYDEGSLAAKVKKWLEAHAYKKNAILFLVLIGTCMAIGDGILTPAISGKKISAQETYRCYMHIVTQPHMYIHIFLGRGPSPTRSNMDVYVFSVLSASGGIKVEDPKITNDVSTIVAVVILVGLFSIQHYGTNKVGWLFAPVVVLWFLLIGAIGALNIWKYDNSVLKAYNPVFIFRYFRRGKRNSWISLGGIMLSITGTEALFADLSYFPVLSIQIAFTLVVFPCLLLAYTGQAAYIVSNNGQAFDAFYRS…
35	628	Monocotyledons	Zingiberales	Banana	Musa acuminata	10	MaHAK10	II:a	GSMUA_Achr5P08010_001 Probable potassium transporter 2 ~gene ~co... 565 e-161	MDRERGPTSDDQRVHWKNYYKNLLLLAYQSFGVVYGDLSTSPLYVYKSSFSGKMYKYQNEQTVFGLFSLIFWTLTLIPLLKYVVIVLSADDNGEGGTFALYSLLCRHAKLSLLPNQQAADEELSTYYRNGPRSVITSPLKRFLERHKKLRTCLLLIVLFGACMVIGDGVLTPAISVLSSISGLQVRAKELHDGEVVLVACLVLVGLFSLQHRGTQRVAFMFAPIVIIWLLCIGVIGLYNTIHWNPKIYHALSPLYVIKFFQQTGKDGWISLGGVLLSITGTEAMFADLGHFTQASIRVAFVGVIYPCLVLQYMGQAAFLSKNFNNISTSFYASIPQPFFWPVFVVSTLAAIVASQAVISATFSIVKQCLALGCFPRVKVVHTSRWIYGRIYIPEINWIL…
35	629	Monocotyledons	Zingiberales	Banana	Musa acuminata	11	MaHAK11	II:c	GSMUA_Achr7P22120_001 Probable potassium transporter 9 ~gene ~mo... 565 e-161	MIETRHRSRAGRSLDVFRGYVETDPTGRYGRFDEVLGRGAMKTVYKAFDELNGTEVAWNQAKLCSMLRSPEALQRMYSEVHLLSSLHHESIIRFHASWIDVENRTFNFITEMFASGTLREYRRRYPHVNIGAIKSWARQILHGLAYLHRHDPPVIHRDIKCDNILINGHLGHVKISDFGLAAILRGSQHTVIGTPEFMAPEIYEEEYNELVDIYSFGMCVLEMLTSEYPYSECYNPAQIYKKVTSGRLPDAFYRIQDPEAKRFVGRCLEDVSKRPSAEELLLDPFLALGDHTVPADAVTGIRSQDQDGLHSMEFHDANSTVWRTDMTITGKMNPEDDTIFLRVQIADAEGHVRNIHFPFDIVCDTPIDVANEMVKELEITDREPSEIAEMIAQETTALV…
35	630	Monocotyledons	Zingiberales	Banana	Musa acuminata	12	MaHAK12	V	GSMUA_Achr8P15870_001 Probable potassium transporter 14 ~gene ~c... 547 e-156	MDSTESRWVARDEEEDSDEEGESLSQRMGLESEEEDDNVEQRLIRTAPRIDSFDVEALEVPGAPRNDFEDDSLGRHIVLALQTLGVVFGDVGTSPLYTFDVLFNKYPLAQKEDVLGALSLVLYTLILIPLVKYILVVLWANDNGEGGTFALYSLICRNAKASLLPNQLPSDARISSFRLKVPSPELERSLKIKEYLENSLLLKKLLLILVLFGTSMVIADGVVTPAMSVMSAFSGLKLGISSVEQDEVVMISIASLIVLFSVQRFGTSKVGLAVGPALFIWFCSLGFVGIYNLFKYGTDVLRAFSPVYIYYFFQRNPTQAWMSLGGCLLCATGSEAMFADLCYFSVRSVQLTFLFLVLPCLILGYLGQAAFLMENFTENQQVFFSSIPSEAFWPVFLIA…
35	631	Monocotyledons	Zingiberales	Banana	Musa acuminata	13	MaHAK13	II:c	GSMUA_Achr11P24920_001 Probable potassium transporter 9 ~gene ~c... 538 e-153	MLFLAYQSLGVVYGDLSISPLYVFKSTFAEDITHSETNEEIFDIFSAAMRLTCFHCLIDYFAGGTFALYSLICRHANVSLLPNRQVADEDLSTYKYEHPPETTNRSRIKIWLEKHKSLHVALLIVVMLGTCMVIGDGVLTPAISIFSAVSGLELSMSKHHHEYAVVPITCFILVCLFALQHYGTHRVGILFAPVVLTWLLCISGLGIYNIIRWNQHVYQALSPYYMFKFLKKTKKGGWMSLGGILLCITGSEAMFADLGHFSYTAIQVAFTFVVYPSLILAYMGQAAYLSKHHRIYTSYQIGFYASVPECLRWPVLGIAILASVVGSQAIISGTFSIINQSQSLGCFPRVKVVHTSEKIHGQIYIPEVNWMLMILCIAVAVGFRDIKHMGNASGLAVIT…
35	632	Monocotyledons	Zingiberales	Banana	Musa acuminata	14	MaHAK14	II:c	GSMUA_Achr3P06140_001 Potassium transporter 6 ~gene ~complete 532 e-151	MDLESGSYINPAKRQSWRSVVMLAYQSLGVVYGDLSTSPLYVYKSTFADDIEHSESNDEIYGVLSFVFWTLTLIPLLKYVLVELLAYNKKDDHLGLLNGDPSAPTGGAMTAPWMRRLLEKHQISQRVLLVLALLGTCMVIGDGVLTPAISVFSAVSGLELSMSKEHHKYVEVPVACLILVCLFALQQYGTHRLGFLFAPIVVIWLMCISVIGAYNIFYWNPHVYQALSPYYMYKFLKKTKRGGWMSLGGVLLCITGSEAMYADLGHFSQSSIKIAFTFVVYPSLLLAYMGQAAYLSQHHVIQNHYRIGFYVSVPERLRWPVLAIAILAAVVGSQSVITGTFSIIKQCTALGCFPRVKIVHTSSKIGGQVYIPEINWILMLLCLAVTIGFRDTKHLGNAQ…
35	633	Monocotyledons	Zingiberales	Banana	Musa acuminata	15	MaHAK15	III	GSMUA_Achr4P33190_001 Putative potassium transporter 12 ~gene ~c... 527 e-149	MAAAPSDGQNSKGNMWVLDQKLDQPMEEEAGRLRDMHREKRLTSAAILRLAFQSLGVVFGDLGTSPLYVFCNAFPRGVDDPEDVVGALSLIIYSLTLVVLLKYVLVVLRANDNGRGGTFALYSLLCRHAKIKTIPDQHRTDEELTTYSCQTYEDNSLAAKVRWWLEAHAYKKNTILVLVIIGTCMVIGDGILTPAISESWSFMSLESLAVFHVSYAIIIVAVIILIGLFSMQHYGTDRVGWLFAPIVLLWFVMIGVIGAMNIWKYDHSVLRAFSPVCVYWYLRRGHNIWTSLGGIILSITGTEALFADVCLFPVLAVQLAFTLVVFPCLLLAYAGQAAYITKNKHHVADAFYLSIPDVIYWPVFIVAAAAAVIGSQATISATFSIIKQAQALRCFPRVK…
35	634	Monocotyledons	Zingiberales	Banana	Musa acuminata	16	MaHAK16	II:b	GSMUA_Achr5P07370_001 Potassium transporter 1 ~gene ~complete 525 e-149	MEDQKKSSWKTVLTLSYQSLGVVYGDLSTSTLYAYKSTFSGKLSLHESDEIVFGVLSFIFWTLTIIPLFKYICFVLSADDNGEGGTFALYSLLCRHAKLCMLPNQQDDDKDLSAYDDEGADTWGSNLLKDFFKKHPMFRGGLLVVVLLGTSMAIGDGVLTPTISVLSAVSGVGVKLPHLHENYVVAISCVILVGLFSLQHHGTHRVGFIFAPIVIAWFLFISAIGIYNIFKWNPGIFCALSPVYMFRFIKATGTDGWVSLGGVMLCITGTETMFANLGHFSSLSIKIAFTCLVYPYALHLLLILTHQNSIRYSELTHLCILKITEPVFWPVFIVATLAAVVGSQAAISATFSIVSQCCAFSCFPPVKIVHTSNQIYGRIYIPEVNWMLMCLCLAVTIGL…
35	635	Monocotyledons	Zingiberales	Banana	Musa acuminata	17	MaHAK17	II:c	GSMUA_Achr9P22670_001 Potassium transporter 6 ~gene ~complete 514 e-146	MDVEGGGFSNPVKRNSWRTVLSLAYQSLGVVYGDLSTSPLYVYKSTFAEDIQHSETNEEIYGVLSFVFWTLTLVPLLKYVFILADEEISAYKKTDRGGAGSPSGGVGAASRVRVMLERHQVLQKMLLILALIGTCMVIGDGVLTPAISVFSAVSGLELSMAREHHKYVEVPIVCLILIGLFALQHYGTHRVGFLFAPVVIIWLLCISAIGVYNIFHWNPHVYQALSPYYMYKFVKKTQRGGWMSLGGILLCITGSEAMYADLGHFSQLSIKIAFTSVVYPSLILAYMGQAAYLSKHHVIENEYRIGFYVSVPEQIRWPVLCIAILAAVVGSQAIITGTFSIIKQCSALGCFPRVKIVHTSSKFHGQIYIPEINWILMILCLAVTIGFRDTKHMGNAAGL…
35	636	Monocotyledons	Zingiberales	Banana	Musa acuminata	18	MaHAK18	II:c	GSMUA_Achr7P20040_001 Potassium transporter 6 ~gene ~complete 510 e-144	MLAYQSLGVVYGDLSTSPLYVYKSTFADDIEHTESNDEIYGVLSFVFWTLTLIPLLKYVFVVLRADDNGEGGTFALYSLLLLEKHHALQLMLLILALIGTCMVIADGILTPAISVFSAVSGLELAMSKEHHKYVEVPIACLILVCLFALQHYGTHRLGFLFAPIVMLWLLCISVIGVYNIFYWNPRVYRAFSPFYMYNFLKKTQRGGWMSLGGILLCITGSEAMFADLGHFSPLSIKIAFTSVVYPSLLLAYMGQAAYLSQHHIIQTDYRIGFYVSVPERIRWPVMAIAILAAVVGSQAVITGTFSIIKQCSALGCFPRVKIVHTSSKIHGQIYIPEINWILMTLCLAVTVGFRDTKLLGNASGLAVMSVMLVTTCLMFLVIVLCWHQSIFLAACFILF…
35	637	Monocotyledons	Zingiberales	Banana	Musa acuminata	19	MaHAK19	II:b	GSMUA_Achr8P07030_001 Probable potassium transporter 13 ~gene ~c... 503 e-142	MKSFTGHCLQKSYRTTLLLAYQSFGVVYGDLSISPIYVYKSTFSGKLRLHEEDAEILGVLSLVFWTLTLIALCKYIIFVLAADDDGEGGTFALYSLMCRNSKMGLLSTPHAAQEHLTAYNPEVHCDETRTSLSIKRFIEKNQSSRLVLLLFVLLGTSMVIGDGVLTPTMSVVSAVSGLRIKVPGLHESKHYTVLISCIILMCLFALQHHGTHRVGFLFAPILISWLVCLSTIGIYNTIMWNPRIVRALSPHYIYYFFNKAGKDGWSSLGSLVLCITGAEAMFADLGHFSKISIRIAFAAVVYPCLVLAYMGEAAYLSKHTEDLQQSFFKALPEGVFWPVFVIATLATVVGSQAIISASFSIISQCRALGCFPRVRIIHTSSHIHGQIYIPEVNWILMLL…
35	638	Monocotyledons	Zingiberales	Banana	Musa acuminata	20	MaHAK20	II:b	GSMUA_Achr3P23510_001 Probable potassium transporter 13 ~gene ~c... 470 e-132	MATFDESHSLVAVYRKHIGPPFCWPTRALVWCMAIYVEIFGVLSLVFWTLTLIALFKYIIFVLGADDNGEGGTFALYSLMCRNSKMGLLSTPHEHLTAYKLEPHREETRTSLSIKKFIEKSQTSRLVLLLFVLLGTSMVIGDGVLTPTMSVVSAVSGLRIKAPELHEIICNWIILIHADYTVLISCIILVGLFGLQHYGTHRVGFLFAPILISWLVCISSIGIYNTIIWNPGVVRALSPHYIYYFFKKAGKDGWSSLGGLVLCITGAEAMFADLGHFSNLSIRIAFTAVVYPCLVVAYMGEAAYLSKHREDLQQSFFKALPEGVFWPVFVIATLATVVGSQAIISATFSIISQCRALGCFPRVRIIHTSSHIHGQIYIPEVNWLLMLSCLMVTIGFRDS…
35	639	Monocotyledons	Zingiberales	Banana	Musa acuminata	21	MaHAK21	IV	GSMUA_Achr7P12380_001 Probable potassium transporter 17 ~gene ~c... 459 e-129	MDLETGVPLPSRLHVGGGSSDGRRVHGADRYNGGRWKDMVLAYRTLGVVFGGLVTSPLYVYPSMNLKSPTEQDYLGIYGIMFWTLTLIGVVKYVCIALNADDHGEGGTFALYSLLCRHTNIGILPSKKADSVTNAAHANPSVGTEKRSRLGIFIERSMTARRIVLFIAILGMCMLIGDGILTPAISVLSAMDGLRGPLPSIHKSAVEALSAAVLIALFLLQKYGTARVSFLFSPIMASWTFTTPIIGVYSILRYYPGIFKAISPKYIVHFFLRNGKTGWQLLGGTALCITGSEAMFADLGHFNKRSIQIAFLFSIYPSLVLTYAGQTAYLIRNPNDHNDGFYKFVPGPVYWPMFTIATLAAIVASQSLISATFSVIKQSVVLDYFPRVKVVHTSQHKEG…
35	640	Monocotyledons	Zingiberales	Banana	Musa acuminata	22	MaHAK22	III	GSMUA_Achr2P02640_001 Probable potassium transporter 11 ~gene ~f... 450 e-126	MLIWLLSASGGIKVNHPKMSNDVVVLVAVVILIGLFSLQHCGTDKVGWLFAPIVLLWFLLIGAIGALNIWKYDSSVLKAFYPIYIYRYFRRRKRDSWISLGGILLSITGTEALFADLCHFPVLAIQISFTLIVFPCLLLAYTGQAAYIIHHNGHVSDAFYRSIPDGVYWPMFIVATAAAIVASQATISATFSIIKQAHALGCFPRVKVVHTSKNFLGQIYIPDINWVLMILCIAVTVGFKNQSQIGNAYGTAVVIVMVVTTFLMIPIMLLVWRSHWILVSIFTTLSLSVELPYLSAVLFKIDQGGWVPLVIAAAFLVVMYVWHYCTVKRYELEVHSRVSMAWMLGLGPSLGLVRVPGIGFVYTELASGVPHIFSHFITNLPAIHSVVVFICIKYLPVYT…
35	641	Monocotyledons	Zingiberales	Banana	Musa acuminata	23	MaHAK23	II:a	GSMUA_Achr10P05360_001 Potassium transporter 7 ~gene ~fragment 422 e-118	MNKLQAISSEVVIVACIVLIGLFALQHRGTQRVAFLFAPIVIVWLLCIGIIGLYNIIHWNPKIYYALSPHYIVTFFKQTGKDGWISLGGVLLCITGTEAMFADLGHFTQASIRVAFVGVIYPCLVLQYMGQAAFISKNFSSLPTSFYESIPEPVFWPVFVVATLAAVVASQAVISATFSIVKQCHALGCFPRVKVVHTSRWIYGQIYIPEINWILMLLCLAVTLGFRDTTLIGNAYGIACMTVMFVTTWMMALIIVFVWQKSTIFACLFLLFFGFIEAVYLSSSIIKVPQGGWAPLVLSFIFMIIMYVWHYGTRRKYLFDLQNKVSMKWILTLGPSLGIVRVPGIGLIYTELVTGVPAIFSHFVTNLPAFHQVLVFVCVKSVPVPYVPPDERYLIGRIG…
35	642	Monocotyledons	Zingiberales	Banana	Musa acuminata	24	MaHAK24	II:c	GSMUA_Achr1P09670_001 Potassium transporter 10 ~gene ~fragment 409 e-114	MGLVLIPCFGEICVTDEGFMEDGADISLPESRGRVWRSEHVAAVRWHVCAVLPPLPPRPSPCVAAPVIASRLDRDLHGYRGWCSHTSHFCFLGGFRARALHILFCGLACNLYCLDRLSGLMFTFSIHRCADVEVPVACLILVALFALQHYGTHRVGFLFAPIVITWLLCISVIGVYNIFHWNPHVYQALSPYYMYKFLKKTQRGGWMSLGGILLCITGSEAMFADLGHFSQLSIQIAFTSVVYPSLILAYMGQAAYLSRHHIIESDYRIGFYVSVPEQIRWPVLGIAILAAVVGSQAVITGTFSIIKQCSALSCFPRVKIVHTSSKVHGQIYIPEINWMLMILCLAVTVGFRDTKRLGNASGLAVIAVMLVTTCLMSLVIVLCWHRSIFLAVCFILFFG…
36	643	Monocotyledons	Poales	Maize	Zea mays	1	ZmHAK1	I:a	GRMZM2G093826_P01	MSLEVDNPAGGAGGGGESANRLSLKRHDSLFGDAEKVSGGKYHGSEGSWARTLHLAFQSVGIIYGDIGTSPLYVYSSTFPDGIKYNDDLLGVLSLIIYTLIIIPMLKYVFVVLYANDNGDGGTFALYSLISRYAKIRLIPNQQAEDAMVSNYSIEAPTSQLKRAQWFKQKLESSRAAKILLFTLTILGTSMVMGDGTLTPSISVLSAVSGIKEKAPNLTQTQVVWISVAILFLLFSVQRFGTDKVGYTFAPVISVWFVLIAGIGLYNLVVHDVGVLRAFNPWYIVQYFKRNGKEGWVSLGGVILCVTGTEGMFADLGHFNIRAVQISFNGILFPSVVLCYIGQAAYLRKFPENVGDTFYKSIPAPLFWPTFIIAILAAIIASQAMLSGAFAILSKALSL…
36	644	Monocotyledons	Poales	Maize	Zea mays	2	ZmHAK2	II:a	AC233953.1_FGP005	MDAEAGVAGADQLPRRQYYLNLLLLAYQSFGVVYGDLSTSPLYVYKSTFSGKLRHYQDEETVFGVLSLIFWTFTLIPLLKYVIIVLSADDNGEGGPFALYSLLCRHAKLSLLPNQQAADEELSSYYRNGFAPRNGSSPWSRRFLEKHKKMRTLFLLIVLCGASMVIGDGVLTPAISVLSSMSGLHVRATGLHHSSVVLLSCIVLVGLFALQHRGTQKVAFMFAPIVIIWLLSIGGIGLYNILHWNPNVYQALSPYYMVKFFRKTGSEAMFADLGHFTSASVRVAFITVIYPCLMLQYMGHAAFLSKNTFHMPTGFYDTIPEPVFWPVFVVATLAAVVGSQAVISATFSIVKQCHALGCFPRVKVVHTSRWIYGQIYIPEINWILMVLCVAVTIAFRDTT…
36	645	Monocotyledons	Poales	Maize	Zea mays	3	ZmHAK3	II:a	GRMZM2G477457_P01	MWLTDPEYGLSPKNTIGIDVYNPPPLHWTSLLVLAYQSCGVVYGDLSTSPLYVYKGTFSGSLHRFLDEETVFGVFSVVFWTITLIPLLKYVFIVLSADDCGEGGTFALYSLLVRHAKFSLMPNQQAADEELSAYYRPGYSTEETPILKALRNFLEKHRKSRTFLLLMVLFGASLVIGDGVLTPAMSVLSSFSGLQVHSNALTHGEVVLLSCIVLVCLFTLQHWGTRRVAFLFAPVVVLWLLLLAALGIYNIAVWNPRILRALSPYYVVRFFQRTGKDGWISLGGVLLSMTGTEAMYADLGHFTAASIRIAFVGLIYPCLVLQYMGQAAFLSKSPDCNIHFIFFESIPRPIFWPVLVIATLAAIVGSQAVISATFSIVRQCTALGCFPRVKIVHTSNRIH…
36	646	Monocotyledons	Poales	Maize	Zea mays	4	ZmHAK4	IV	GRMZM2G425999_P01	MSRILATNLPQQKKRIYKDLLLAYKTLGVVFGGLVTSPLYVYPSMNLTNPTEEDYLGIYSIMFWTLTLIGVVKYICIALNADDHGEGGTFAMYSLLCQHANIGILPSKKIYTEEEQGLVPARPVAARRPSKVRRFIERSITARRLLQLTAILGMCMLIGDGILTPAISILSAVDGLRGPFPSVSKPTVEALSAGILIGLFLLQKYGTSKVSFMFSPIMAAWTFTTPIIGIYSIWRYYPGIFKSVSPYYVVHFFVTNRKRGWQLLGGTVLCITGAEAMFADLGHFNKRSIQIAFLSSIYPSLVLTYAGQTAYLINHVGDFGDGFYKFVPRPVYWPMFVIATLAAIVASQSLISATFSVVKQSVALDYFPRVRVVHTSKDKEGEVYSPETNYLLMLLCVGA…
36	647	Monocotyledons	Poales	Maize	Zea mays	5	ZmHAK5	I:a	GRMZM2G084779_P01	MAEPHHTSSNGAAHGDADDASEKMPPKRLQRYDSLHMEAGMFPAGGSTHAAKVGWATTLHLAFQSIGVVYGDMGTSPLYVFSSTFTNGINNTDDLLGVMSLIIYTVILLPLIKYCFIVLRANDNGDGGTFALYSLISRYARVSLIPNQQAEDAMVSHYKLESPTYPMKRAHWIKKKMESSPKFKVLLFLVTVLATSMVIGDGVLTPSMSVLSAVGGIQQRATNLTQGQIVGISIAILIVLFLVQCFGTDKVGYTFAPIILAWFLLIAGIGVYNLIKHDVSVLKAFNPKYIVDYFKRNGKQGWISLGGVILCITGTEAMFADLGHFNVRAIQIGFSVVLFPSVLLAYIGQAAYLRVYPENVANTFYKSIPGPLYWPTFVVAVAAAIIASQAMISGAFAII…
36	648	Monocotyledons	Poales	Maize	Zea mays	6	ZmHAK7	II:a	GRMZM2G020766_P01	MDEEVGAAGRQQVQWKSYCSTLSLLAFQSFGVVYGDLSTSPLYVYRNSLSGRLNGYLDETTIFGLFSLVFWTFTLVPLLKYVIIVLSADDNGEGGAFALYSLLCRHAKFSLLPNQQAADEELSTYYHPGTDRAVVSSPFKRFLEKHRKLRTCLLLFVLFGACMVIGDGVFTPTISVLSAISGLQDPATSGLGDGWIVFIACVMLVGLFALQHRGTHKVAFLFAPIIVLWLLSIGIIGLYNIIRWNPRIFVALSPHYIVKFFKKTGKDGWISLGGVLLAITGTEAMFADLGHFSAASIRLAFVSVIYPCLVLQYMGQAAFLSKNIPAVYNSFYLSIPSPLFWPVFVIATLAAILGSQAIISATFSIVKQCLALGCFPRVKVVHTSRWIRGQIYIPEINWI…
36	649	Monocotyledons	Poales	Maize	Zea mays	7	ZmHAK8	II:c	GRMZM2G173387_P01	MDLEFGRGLRSPKRDSWKTTLLLAYQSLGVVYGDLSISPLYVYKSTFAEDIQHSETNEEIFGVLSFVFWTLTLIPLVKYVSVVLRADDNGEGGTFALYSLICRHANVSLLPNRQIADEELSTYKLECPPEITDKSRIKVWLERHRKLRVALLVMVMIGTCMVIGDGVLTPAISVFSAVSGLEFSLSKDHREYAVIPITCVILAFLFALQHYGTHRVGFLFAPIVLAWLFCMSALGLYNIIHWNPQIYQALNPSYMFKFLKKTRKYGWMSLGGILLCMTGSEAMFADLGHFSYSAIQLAFTCLVYPALILAYMGQAAYLSKHHDFYSSSQVGFYIAVPDKIRWPVLILAILASVVGSQAIISGTFSIINQSLSLSCFPRVKVVHTSEKIHGQIYIPEINW…
36	650	Monocotyledons	Poales	Maize	Zea mays	8	ZmHAK9	II:c	GRMZM2G166738_P01	MDPEFGVGTAPQKGRRAWRTTLLLAYQSLGVVYGDLSISPLYVYKSTFAEDITHSETNQEIFGALSFVFWTLTLVPLLKYATIVLRADDSGEGGTFALYSLICRHANVSLLPNRQVADEELSTYRLERPREAAGRSGLLRAWLEKHTRLHTALLVMVMIGTCMVIGDGVLTPAISVFSAVSGLELSLSKDQHEYAVIPITCAILVFLFALQHYGTHRVGFLFAPIILAWLLCMSAIGLYNIVRWNPQIYQALNPVYMIRFLRKTKKSGWMSLGGILLCMTGSEAMFADLGHFSYSAIQLAFTSLVYPSLILGYMGQAAYLSQHHNLDASYQIGFYIAVPECVRWPVLVLAILASVVGSQAIISGTFSIINQSQSLSCFPRVKVVHTSDKVHGQIYIPEV…
36	651	Monocotyledons	Poales	Maize	Zea mays	9	ZmHAK10	II:c	GRMZM2G443728_P02	MKSPPVMDPEAPPSPPLPGTPPDDEEEKRGGRNGVPWRMTLSLAYQSLGVVYGDLSTSPLYVYKAAFAEDIQHTESNEEILGVLSFVFWTLTLVPLLKYVCVVLRADDHGEGGTFALYSLLCRHARAALLPPGRTAAGDEDQFLDGADGGTKKATAQNGNAVTLGGGAAASVRRLLERHKVLQRVLLVLALVGTCMVIGDGVLTPAISVFSAVSGLELSMEKEHHKYVELPIACIILVCLFALQHYGTHRVGFIFAPVVVTWLLCISVIGVYNIIHWEPTVYRALSPYYMYKFLRKTQRGGWMSLGGILLCVTGSEAMFADLGHFNQLSIQIAFTCMVYPALILAYMGQAAYLCKHHTMESDYRIGFYVSVPEKIRWPVMAIAILAAVVGSQAVITGTF…
36	652	Monocotyledons	Poales	Maize	Zea mays	10	ZmHAK11	III	GRMZM2G005040_P01	MSSMASLSESELTNRGSMWELDQNLDQPMDEEAGRLKNMYREKKFSSALLLRLAFQSLGVVFGDLGTSPLYVFYNIFPRGIGEGEDEDVIGALSLIIYTLTFIPLLKYVFVVLRANDNGQGGTFALYSLLCRHAKINTIPNQHRTDEELTTYSRQTYEENSVAAKIKRWIESHAYKRNILLVLVLIGTCTAIGDGILTPAISVLSASGGIRVQNQNMSTDVVVLVAVVILIGLFSMQHYGTDKVGLLFAPIVLLWFILIGSVGAINIHKYNNSVLRAYNPISIYRFFQRRRNYDIWTSLGGIMLSITGTEALFADLCHFPVLAIQIAFTLIVFPCLLLAYTGQAAYIISNKTHVADAFYRSIPDAIYWPAFVIATAAAIVASQATISATYSIIKQALAL…
36	653	Monocotyledons	Poales	Maize	Zea mays	11	ZmHAK12	III	GRMZM2G009353_P02	MLMASMSDSETTNRGSMWELDQNLDQPMDEEASQLKNMYKEKKFSSILLLRLAFQSLGVVFGDLGTSPLYVFYNIFPHGVDEDEDVIGALSLIIYTLTLIPLMKYVFVVLRANDNGQGGTFALYSLLCRHAKVSTIPNQHKTDEELTTYSRQTYEENSLAAKVKKWLEGHAYKKNCLLILVLIGTCTAIGDGILTPAISVLSAAGGIRVQNQNMSTDVVVIVAVFILIGLFCMQHYGTDKVGWLFAPLVLLWFILIGSVGLVNIRKYNSSVLKAYNPVYIFRYFRRGKSEIWTSLGGVMLSITGTEALYADLCHFPVLAIQFAFTLVVFPCLLLAYTGQAAYIIDNKDHVVDAFYRSIPEAIYWPAFIIATLAAVVASQATISATYSIIKQALALGCFP…
36	654	Monocotyledons	Poales	Maize	Zea mays	12	ZmHAK13	II:b	GRMZM2G146140_P02	MDDVEEGVGRPAVQLQYTTKRAASSPWGLRKATLLLAYQSFGVVYGDLCISPVYVYKNTFSGKLRLHEEDEEILGVLSLVFWSLTLIPLLKYIILVLGADDDGEGGTFALYSLMCRRSRMGLLMNSINDGCLSVYSQEEEPREEELKSSLAIKSFIERHYSLRVLLLLFVLMGTSMVIGDGVFTPTMSVLSAVSGLRIKFPELHESKKLFIIHIAHNDLLLLGADASQYFPDYTVLLACFILVVLFALQHYGTHRVGFLFAPILLAWLGCIGGIGIYNIFRWNPSVVRALSPYYIYNFFRKAGKDGWSSLGGIVLCITGAEAMFADLGHFSKLSLRLGFTIVVYPCLVLAYMGEAAYLSKHREDLQSSFYKALPDRVFWPVLIIATLATVVGSQAIISA…
36	655	Monocotyledons	Poales	Maize	Zea mays	13	ZmHAK14	V	GRMZM2G139931_P01	MKAESGGVVRRSLQKTESAEMRWVVPGGANEDVEIESSDDGSVDTSATASGSRGGGCSDEDEGYENDEMLRQLLVRTGPRADSFDVEALDVPGVYRHQEFTLGSSIVLTLQTLGVVFGDVGTSPLYTFDVMFNKYSITAKEDVLGALSLVIYTLILIPFLKYTLIVLWGNDGGEGGTFALYSLICRNAKASLLPNQLPSDTRIANFNLKVPSVELERSLKIKERLETSSMLKKLLLMLVLFGTSMVIADGVVTSAMSVMSAVNGLKVGIASVNEGEVVMITVAFLIVLFSLQRFGTSKVGLAVGPALFVWFCCLAGIGMYNLRVYGPEVLQAFNPVYIYYYFERNPTEAWMSLGGCLLCATGSEAMFADLCYFSVKSVQLTFVFLVLPCLLLGYLGQAA…
36	656	Monocotyledons	Poales	Maize	Zea mays	14	ZmHAK15	V	GRMZM2G121063_P02	MAAATGGMRKAPSLEWRWVSTEDDDDEDRAGDGAAAAVVGAVSRGGSFESEDDEDDEEEEDEEKKGRKRLIRTVPSVDWFDVEGNEVSVAQQLDDSEEFDFGRTMFLALQTLAVVFGDIGIGPLYTFDVMFNKYPILGEEDVLGALSLVLYTLILMPLVKYVLVVLWANDDGEGGLFALYSLICRNAKVCLIPNQVQSEKRMSSFRLKLPTPELERSIKVKEKLESSLLLKKVLLGLVLFGTSMFISNGVITPAMSVLSAVSGLKVGLPNTSQDAVVMISIALLVVLFSVQRYATSKVGFAIGPSLLLWFCCLGGIGIYNLSIYGSTAFRAFNPLYIIYYFGRNPFQAWLSLGGCLLCATGSEAIFSNLCYFPVRYVQYMFVLLVLPCLVLAYLGQAAF…
36	657	Monocotyledons	Poales	Maize	Zea mays	15	ZmHAK16-a	I:a	GRMZM2G084486_P01	MAAHQHGTAGRGGGGGSMEIFPYSYSSGRDLELVDLPAEPVDVKRQDSLYRDATMPAHHGHNGQESWVRTLRLAFQCVGILYADLGTSPLYVYANTFKYGVHHEDDVLGVLSIIIYSFVLFTMIKIVFIALYANDDGDGGTFALYSLISRYAKVCLIPNQQAEDELVSRYKHRSKPSATLRRAQWMKDLLETSKTAKVSLFFLTILATALAISDCMLTPPISVLAAVNGLKLRAPHLTTDETVWITVGILVVFFAVQRLGTDKIGYTFAPVVFVWLLLISGIGLYNTVKYDVSTLKAFNAKYIVDYFRRNKKKGWVSLGEILLCFTGTEALFADLGYFSIRSIQLSFTFGLLPSVMLTYIGQAAYMRKHIDTLDISNVFFQSIPRSLFWPTFVLALITS…
36	658	Monocotyledons	Poales	Maize	Zea mays	16	ZmHAK16-b	I:a	GRMZM2G097505_P01	MAHTGAAGGPETSLPHSGDLELELPPPVNWLRQDSLYRDATRPAHGAHHHGGQESWVRTLRLAFQCVGIMYADLGTSPLYVYANTFKYGVHHEDDVLGVLSIIIYSFALFTMVKIVFIALYANDEGDGGTFALYSLISRYAKICLIPNQQDEDELVLRYKHQAKPSATRRRAQWMKNFLETSKAAKISLFFLTILATALAISDCMLNPPISVLAAVNGLKLKAPHLTKDAEVWITVGILVALFSVQRFGTDKIAYTFAPVVTVWLLLIGGIGVYNVIKYDIGTLRAFDPKYIIHYFQRNKKKGWVSLGEILLCVTGTEALFADLGYFSIRSIQLSSTFGLLPSVLLTYIGQAAYLRKHMDMDISNAFFNSVPSSLFWPAFILALIASVIGSQAMISCAF…
36	659	Monocotyledons	Poales	Maize	Zea mays	17	ZmHAK17	IV	GRMZM2G088964_P01	MNLSSPTKDDYMGLYSIMFWTLTLIGVVKYVGIALNADDHGEGGTFAMYSLLCRHADIGILPSKKVYLEEEPLLRNQSAAARRPSWLGKFFERSITARRALLFMSILGMCMLIGDGILTPAISVLSAIQGLRGPFPSVRNSVVEALSAVILIGLFLLQKYGTSKVSFLFSPIMAAWTFTTPIIGLYSIVHYYPGIFKAISPHYIVRFFLRNKKEGWRMLGGTVLCITGAEAMFADLGHFSKKGIQIAFLSSIYPSLVLTYAGQTAYLINNVNDFSDGFYKFVPRPVYWPMFIIATLAAIVASQSLISATFSVIKQSVVLDYFPRVKVVHTSQHKEGEVYSPETNYILMVLCVSVVLGFGAGNAIGNAFGVVVIMVMLITTVMLTLVMIIIWRTPPVLVA…
36	660	Monocotyledons	Poales	Maize	Zea mays	18	ZmHAK18	III	GRMZM2G086389_P02	METTSTTNEQTDRGAMWELERNLDQPMDAEAGRLRNMYREKSYPTLVLLQLAFQSLGVVFGDLGTSPLYVFSNIFPHEIEDTEQIIGALSLVIYSLTLIPLVKYVFIVLRANDNGQGGTFALYSLLCRHAKINTIPNQHRTDEELTTYSRHTYDEKSLAAKIKRWLEGHQFRKNVILILVLFGTCMAVGDGILTPAISVLSATGGIQVEEKKMKNDAVVIVSVVILIGLFSMQHFGTDKVSWLFAPIVFVWFILIGVLGAVNISKYDQSVLKAFNPIYVYRYFKRGKTSWASLGGIMLSITGTEALFADLSYFPVQAIQIAFTVVVFPCLLLQYTGQAAYIAQNKDHVSHAFYFSLPDSVLWPSFIVATAAAIVASQATISMTYSIIKQALALGCFPRV…
36	661	Monocotyledons	Poales	Maize	Zea mays	19	ZmHAK19	I:a	GRMZM2G021725_P01	MSLEVEKPPETTKQLKRQDSLYGDAEKVSGFKHHGSEGGWPRLLQLAFQSIGIIYGDVGTSPLYAISSTFPDGIKDQDDLLGVLSLILYTLILIPMVKYVFIVLYADDNGDGGTFALYSLISRHSKVRLIPNQQAEDAMVSNYGIEAPSPELRVAQWLKQKLESSKAAKISLFIITILGTSMVMGDGTLTPSISVLSAVSGIREKVPSLTETQVVWISVPILFALFSVQRYGTDKVGYSFAPIITLWFFLIAGIGMYNLIVHEIGVLRAFNPMYIVDYFRRNGKDGWVSLGGVILCVTGTEGMYADLSHFNIKAIQISFSTVLLPSVALCYIGQTAYLRKFPESVADTFFRSIPELMFWPTFIIAILSAIIASQAMLSGAFAILSKALSLGCFPSVQVI…
36	662	Monocotyledons	Poales	Maize	Zea mays	20	ZmHAK20	I:a	GRMZM2G395267_P01	MALETDKRNSREAKKVGGNFQRHDSLYGDAERVSDTGYVVSECCGLDTHTYYMRQDSWARTLHLAFQCIGVIYGDIGTSPLYVYASTFTSGISNVDDLYGVLSLILYSLILLPMIKYVFIVLYANDNGDGGTFALYSLISRYAKVSLIPNQQAEDAMVSNYALETVSAPMKRAQWTKEMLESSKAAKLAIFLLTVLGTSMVISDGVLTPAISVISAVSGLQQKAPQLKQDQMVWISVAILVVLFAVQRFGTDKVGYSFAPIILLWFMFIAGIGIYNLVEYDIGVLRAFYPKYIVDYFRRNGRDAWVSLGGILLCFTGTEAMFADLGHFNIRSIQLSFSFILFPAVSLAYIGQAAFLRKHPEHVHDTFYKSIPGPMFWPTFIVAVSAAIIASQAMISGSF…
36	663	Monocotyledons	Poales	Maize	Zea mays	21	ZmHAK21	I:a	GRMZM2G438960_P01	MVLATAERGGEEKVDHRPAAAAVVDVESGSLYSSSSSVVDRQDSLFREAVTGGHHRGAGGHSHDHDSWGTTLRLAFQCVGIMYGDLGTSPLYVYSTTFAHGGVGHPDDILGVLSLIIYSFLLFTVVKIVLVALHANDDGDGGTFALYSLISRYAEVSLLPNHQAEDELVSGYTCTSHGKPPSAALRRAHWLKHLLETSKSAKISLFLLTILAIAMVISDAVLTPPISVLSAVSGLKEKVPDLTTDQTVWITVAILVLLFAIQRFGTDKVGYSFAPIILLWLLLIGGVGLYNLVKYDAGVLRSFNPKYIVDYFRRNKKDGWVSLGDILLVFTGTEALFANLGYFSIKSIQFSFSLGLLPSVLLTYIGQAAYLRKHPEHFADTFFRSTPSALFWPTFILAI…
36	664	Monocotyledons	Poales	Maize	Zea mays	22	ZmHAK22	I:a	GRMZM2G409771_P01	MPQQAVLVGLTAGMVAAEGKAAGNKTMMQKQQASSCCSDRDQDMADLELALEAVVPVSVQRQDSLYRDATRAGGGGQQQHEGWARTLRLAFQCVGVLYGDIGTSPLYVYSSTFAGGIRDTDDLLGVLSLIIYSFLLFTIIKYVYIALRANDDGDGGTLALYSLISRHAKVSLVPNHQPEDELQTTDAAAAVLGKHGSVRRRTVQLAASHGREQRAVWVKELLETSKPVRISLFFLTIVATAMVISDACLTPAISVLSAVGGLKEKAPNLTTGTAGARPRVRTPDRVDHCGHPGASVRRAALRHPQGGLPVRPRLLLWLLLIGGVGVYNLLRHDVTVLRAFNPKYILDYFRRNGRDAWVSLGGVLLCFTGTEALFADLGYFSIRSIQLSFGFGLVPAVLL…
36	665	Monocotyledons	Poales	Maize	Zea mays	23	ZmHAK23	V	GRMZM2G036916_P01	MDDGGIQEEPPSTRFLTPTRSGGTRWVDGSEVDSSESTPSWSLEDERSAGGVSSNGGAAAASRVSSGAFRRRFGKRPRRVDSLDVESMNVRGAHGHSSKEISMLSTLAMAFQTLGVVYGDMGTSPLYVFSDVFSKVPIKSEVEILGALSLVMYTIALIPFAKYVFIVLKANDNGEGGTFALYSLICRYAKVSLLPNQQRVDEDISSFRLKLPTPELERAISVKDCLEKKPLFKNILLFLVLMGTSMVIGDGILTPSMSVMSAVSGLQGQVPGFDTNAVVIVSIVVLLLLFSVQRFGTGKVGFMFAPILALWFINLGSIGIYNLVKYDISVVRAFNPVYIYLFFETNGIKAWSALGGCVLCITGAEAMFADLGHFSVKSIQVAFTAVVFPCLLIAYMGQA…
36	666	Monocotyledons	Poales	Maize	Zea mays	24	ZmHAK24	II:c	GRMZM2G120163_P01	MDAESGRGAAGARKKSWRSELVLAYQSLGVVYGDLATSPLYVYKSAFAGGDIEHSEGNEEIYGVLSLVFWTLTLITLLKYVLVVLRAADDGEGGTFALYSLICRRVRAGLLPGVGDSAVDELKDQPDGALPPPASSVRAALQQRRELQWLLLLFALLGTSMVIGDGVLTPAVSVFSAVSGLKLSMVNEQHQYVLLPVTCVILVGLFALQHFGTHRVGFLFAPIVCLWLLCISTIGVYNIFIWNPHIYKALSPYYMYRFLQKTQVGGWMSLGGILLCVTGSEAMYADLGHFSQSSIKIAFTAVVYPSLVLAYMGQAAYISRHHNFERNHHIGFYISVPEKIRWPILGIAILAAVVGSQAVITGTFSVIKQCCSLNCFPRVKIVHTSSTVHGQIYIPEINW…
36	667	Monocotyledons	Poales	Maize	Zea mays	25	ZmHAK25	II:c	GRMZM2G375116_P01	MDLESADGAEAADGKRRGESLRATLLLAYQSLGVVYGDVATSPLYVYKSAFAGNDIQHSEGNEEIYGVLSFVFWTLTLITLIKYVLIVLRADDGGEGGTFALYSLICRHVRAGLLPGGGTRDELMEEEKVTGRRGERPVSRVRAVLEKYRVLQRLLLLFALLGTCMVIGDGVLTPAVSVFSAVSGLELSLEKEQHKYIELPVACAILICLFALQHYGTHKVGFLFAPIVCIWLVCISAIGLYNIIRWDPHVYRALSPYYMYQFLRKTQTGGWMSLGGILLCVTGSEAMYADLGHFSQSSIQIAFISVVYPALVLAYMGQAAFISQHHSFESSYHIGFYVSVPETLRWPVLVIAILAAVVGSQAIITGTFSIIKQCSSLSCFPGVKIVHTSSTLHGQIYI…
36	668	Monocotyledons	Poales	Maize	Zea mays	26	ZmHAK26	IV	NP_001148930	MEHRAAAPDVIVQVNSAAVAAVDERISTCQITEEEGGIVGHEQVPVGCLARRTFSQSYRTRPRNPLEFTGWQLALLAYQSLGVVYGDIGTSPLYTFSSFALPDPGTADILGILSLILWTLTLVSLVKYVFIVLHADDHGEGGTFALYSLLRQHVNFSGKSVPVPVTRLASDANLRFHSRKSSQQPRMLEFLEGSAMAQAVITYLVLVGTCMVMGDGALTPSISVLSAVQGIQSRSSSIKQGHVVLLCVVILVILFLFQQYGTSKVGFTFSPIMLVWFALIASTGLYNIIKHYPPVLKAISPHYIYLFFARNKRAGWEQFGTVVLCITGAEAMFADLGHFNKKSIQMAYSCLVYPSLILAYAGQAAFLIKNPSKLSTTFYSSVPEPLFWPVFVVATLAAI…
36	669	Monocotyledons	Poales	Maize	Zea mays	27	ZmHAK27	I:a	GRMZM2G455817_P01	MAPAQHQAAADRGSREEIVIVDLESEAGADDAAAAAATMQRQDSLYAAATRAAGANHHGQDSWARTLRLAFQCVGILYGDIGTSPLFVYSSTFRDGVGHPDDLLGALSLIIYSFLLFTVIKYVYIALRANDDGDGGTFALYTLISRHAKVSLIPNQQVEEDDLVAKYNRDKPPATLRRAEWMKELLETNKAVKVSLFLITMLATAMVISDAILTPAISVLSAVGGLKEKATFLTTDEIVWITVGILVALFAIQRFGTDKVGYLFAPIILLWLLLIAAVGFYNLVKYDTGALRAFNMKYIIDYFRRNKKKGWASLGGILLCFTGTEALFADLGYFSIRSIQLSFGFGLVPSVLLAYIGQAAYLRVHPEDVANTFYRSTPISLFWPTFILALAASIIGSQA…
37	670	Monocotyledons	Poales	Sorghum	Sorghum bicolor	1	SbHAK1	I:a	>Sbicolor_v1.0|Sb01g015970|Sb01g015970.1	MVLAAESSRGREYGGDRPAEVVVVDIESGGGSLDGASSSSIVDRQDSLFREAVTGHHRRAAGGAGHSDHDSWGTTLRLAFQCVGILYGDVGTSPLYVYSTTFGHGGDGGGVGHPDDILGVLSLIIYSFVLFTVIKIVVVALHANDDGDGGTFALYSLISRYAKVSLLPNHQAEDELVSSYSTNLGKPSATLRRAHWLKHLLETSKSAKISLFLLTILAIAMVISDAVLTPPISVLSAVSGLKEKVPDLTTDQIVWITVAILVVLFAIQRFGTDKVGYLFAPIILLWLLLIGGVGLYNLIKYDVGVLRSFNPKYIIDYFRRNKKEGWVSLGDILLVFTGTEALFANLGYFSIRSIQLSFSLGLLPSVLLTYIGQAAYLRKHPEHFANTFFRSTPSALFWP…
37	671	Monocotyledons	Poales	Sorghum	Sorghum bicolor	2	SbHAK2	I:a	>Sbicolor_v1.0|Sb01g015990|Sb01g015990.1	MAHQHGSAAGGRGGGSMEIVPYSFSSGRDLELELPPFDVKRQDSLYRDATMPAHAAHHGQESWVRTLRLAFQCVGILYADLGTSPLYVYANTFKDGVHHEDDVLGVLSIIIYSFILFTMIKIVFVALYANDDGDGGTFALYSLISRYAKVCLIPNQQAEDELVSRYKHRGKPSATLRRAQWMKNLLETSKAAKISLFFLTILATALAISDSMLTPPISVLAAVNGLKLRAPHLTTDATVWITVAILVVFFSVQRFGTDKIGYTFAPVVFVWLLLISGIGIYNTVKYDISTLKAFNAKYIIDYFRRNKKKGWVSLGEILLCFTGTEALFADLGYFSIRSIQLSFSFGLLPSVFFTYIGQAAYLRKHMDRPEIIPNVFFESIPTSLFWPTFILALITSVIG…
37	672	Monocotyledons	Poales	Sorghum	Sorghum bicolor	3	SbHAK3	I:a	>Sbicolor_v1.0|Sb01g016000|Sb01g016000.1	MAQQAGAGGGGGLEMVAHSGDLELELPPVNWPLRQDSLYRDATKPAHAAGHHHGRQESWARTLRLAFQCVGIMYADLGTSPLYVYANTFKYGVKHEDDVLGVLSIVIYSFVLFTMIKIVFIALYANDEGDVLAAVNGLKLKAPHRLTKDAEVWITVGILVALFSVQRFGTDKIGYTFAPVVTVWLILIGGIGIYNVIMYDIGTLRAFNPKYIVDYFQRNKKKGWVSLGEILLCVTGTEALFADLGYFSIRSIQLSSTFGLLPSVLLTYIGQAAYLRKHMDMPDISNVFFNSVPSSLFWPTFILALIASVIGSQAMISCAFATMSHLQALNCFPRVKILRTSGHYWGQMYIPEVNIFLCISACLVTISFKTTGFIARAHELVYTAAVLYKFIHGPYLSLA…
37	673	Monocotyledons	Poales	Sorghum	Sorghum bicolor	4	SbHAK4	I:a	>Sbicolor_v1.0|Sb01g016010|Sb01g016010.1	MASQQAADYRGSREEIVIVDLESEEAAVDDVDLPPATMQRQDSLYVAATRAAGANHHGQDSWARTLRLAFQCVGILYGDIGTSPLFVYSSTFRDGVGHPDDLLGALSLIIYSFLLFTVIKYVYIALRANDDGDGGTFALYTLISRHARVSLIPNQQVEDELVSKYNRDKPPATLQRAEWMKELLETNKTVKISLFLITMLATAMVISDAILTPAISVLSAVDGLKEKASFLTTDEIVWITVGILVVLFAIQRFGTDRVGYLFAPIILLWLLLIAGVGLYNLIKYDTGALRAFNMKYIIDYFRRNKKKGWVSLGGILLCFTGTEALFADLGYFSIKSIQLSFGFGLVPSVLLAYIGQAAYLRVHPEDVANTFYRSTPISLFWPTFILALAASIIGSQAMI…
37	674	Monocotyledons	Poales	Sorghum	Sorghum bicolor	5	SbHAK5	II:c	>Sbicolor_v1.0|Sb01g036050|Sb01g036050.1	MDLEFGRALRSPKRDSWKTTLLLAYQSLGVVYGDLSISPLYVYSSTFAEDIQHSDTNEEIFGVLSFVFWTLTLIPLIKYVSVVLRADDNGEGGTFALYSLICRHANVSLLPNRQIADEELSTYKLECPPEITDKSRIKVWLEKHRKLRVALLIMVMIGTCMVIGDGVLTPAISVFSAVSGLEFSLSKDHHEYAVIPITCVILAFLFALQHYGTHRVGFLFAPIVLAWLFCMSALGLYNIIHWNPHIYKALNPSHMFKFLKKTRKYGWMSLGGILLCMTGSEAMFADLGHFSYSAIQLAFTCLVYPALILAYMGQAAYLSRHHDFYSGSKVGFYIAVPDKIRWPVLILAILASVVGSQAIISGTFSIINQSQSLSCFPRVKVVHTSEKIHGQIYIPEINW…
37	675	Monocotyledons	Poales	Sorghum	Sorghum bicolor	6	SbHAK6	I:a	>Sbicolor_v1.0|Sb02g000340|Sb02g000340.1	MAQQAAGTVAVCTAAAAAEGRNKAAAANKQQQASSCCSEHDEDMADLELALELPMGVQRQDSLYRDATRAGGGGGNGNQQQEGWARTLRLAFQCVGVLYGDIGTSPLYVYSSTFTGGIRDVDDLLGVLSLIIYSFLLFTIIKYVYIALRANDDGDGGTLALYSLISRHAKVSLVPNHQPEDELHTTDDAAVLGKRGSMRRRSVQLASHREQRAVWVKELLETSKPVRISLFFLTIVATAMVISDACLTPAISVLSAVGGLKEKAPNLTTDQIVWITVGILVVLFGVQRFGTDKVGYLFAPVVLLWLVLIGGVGVYNLVKHDMSVLRAFNPKYILDYFRRNGRDAWVSLGGVLLCFTGTEALFADLGYFSVRSIQLSFGFGLVPAVLLAYMGQAAFLRRY…
37	676	Monocotyledons	Poales	Sorghum	Sorghum bicolor	7	SbHAK7	III	>Sbicolor_v1.0|Sb02g011240|Sb02g011240.1	METTSTTNEQPGRGAMWELERNLDQPMDAEAGRLRNMYREKTYPTIVLLQLAFQSLGVVFGDLGTSPLYVFYNIFPREIEDTEQVIGALSLIIYSLTLIPLVKYVFIVLRANDNGQGGTFALYSLLCRHAKINIIPNQHRTDEDLTTYSRHTYDEKSLAAKIKRWLEGHQIRKNAILILVLFGTCMAVGDGILTPAISVLSATGGIQVEQPRMRNDVVVIVSVVILIGLFSMQHFGTDKVSWLFAPIVFVWFILIGVLGAVNISKYDQSVLKAFNPIYVYRYFKRGKTSWASLGGIMLSITGTEALFADLSYFPVQAIQIAFTVVVFPCLLLQYTGQAAYIAQNKDHVSHAFYFSLPDSVLWPSFIVATAAAVVASQATISMTYSIIKQALALGCFPRV…
37	677	Monocotyledons	Poales	Sorghum	Sorghum bicolor	8	SbHAK8	V	>Sbicolor_v1.0|Sb02g023620|Sb02g023620.1	MDDGGIQEEPPSARFLTPTRSGGTRWVDGSEVDSSESAPSWSLEDERSAGAVSSNGGAGAASRVSSGAFRRRFGKRPRRVDSLDVESMNVRGAHGHSAKEISMLSTFAMAFQTLGVVYGDMGTSPLYVFSDVFSKVPIKSEVEILGALSLVMYTIALIPFAKYVFIVLKANDNGEGGTFALYSLICRYAKVSMLPNQQRVDEDISSFRLKLPTPELERAISVKDCLEKKPLFKNILLFLVLMGTSMVIGDGILTPSMSVMSAVSGLQGQVPGFDTNAVVIVSIVVLLLLFSVQRFGTGKVGFMFAPILALWFINLGSIGIYNIVKYDISVVRAFNPVYIYLFFETNGIKAWSALGGCVLCITGAEAMFADLGHFSVKSIQVAFTAVVFPCLLIAYMGQA…
37	678	Monocotyledons	Poales	Sorghum	Sorghum bicolor	9	SbHAK9	IV	>Sbicolor_v1.0|Sb02g026170|Sb02g026170.1	MTTVSHLDLEAGWPGPGPGRGGGGGPPEYEQAEVGNFRKDLALAYKTLGVVFGGLVTSPLYVYPSMNLSSPTKDDYMGLYSIMFWTLTLIGVVKYVGIALNADDHGEGGTFAMYSLLCRHADIGILPSKKVYSEEEPLLQNQSARAGRPSWLGKFFERSITARRALLFMAILGMCMLIGDGILTPAISVLSAIQGLRGPFPSVSNAVVEVLSAVILIGLFLLQKYGTSKVSFLFSPIMAAWTFTTPIIGLYSIVHYYPGIFKAISPHYIVRFFLRNKKEGWRMLGGTVLCITGAEAMFADLGHFSKKSIQIAFLSSIYPSLILTYAGQTAYLINNVNDFSDGFYKFVPRPVYWPMFIIATLAAIVASQSLISATFSVIKQSVVLDYFPRVKVVHTSQHK…
37	679	Monocotyledons	Poales	Sorghum	Sorghum bicolor	10	SbHAK10	V	>Sbicolor_v1.0|Sb02g034330|Sb02g034330.1	MEAESGGVVRRRLQKTESAEMRWVVPGGANEDDEIESSDDGGFDTPVAASGSRGGGFSDEDDGYEEDEMLRQRLVRTGPRADSFDVEALDVPGVYRHQEFTLGSCIVLTLQTLGVVFGDVGTSPLYTFDVMFNKYPITAKEDVLGALSLVIYTLILIPFLKYTLIVLWGNDDGEGGTFALYSLICRNAKASLLPNQLPSDTRISSFNLKVPSVELERSLKIKERLETSSMLKKLLLMLVLFGTSMVIADGVVTPAMSVMSAVNGLKVGISSVNEGEVVMITAAFLIVLFSLQRFGTSKVGLAVGPALFIWFCCLAGIGIYNLRIYGSEVFRAFNPVYIYYYFERNTTEAWMSLGGCLLCATGSEAMFADLCYFSVKSVQLTFVFLVLPCLLLGYLGQAA…
37	680	Monocotyledons	Poales	Sorghum	Sorghum bicolor	11	SbHAK11	II:a	>Sbicolor_v1.0|Sb02g042430|Sb02g042430.1	MDEEVGAAGRQQVQWKSYCRTLSLLAFQSFGVVYGDLSTSPLYVYRNSLSGRLNDYLDETTIFGLFSLVFWTFTLIPLLKYVIIVLSADDNGEGGTFALYSLLCRHAKFSLLPNQQAADEELSTYYHPGTDRTVVSSPFKRFLEKHRKLRTCLLLFVLFGACMVIGDGVLTPTISVLSAISGLQDPATSGLGDGWIVLIACVVLVGLFALQHRGTHRVAFLFAPIVVFWLLSIGIIGLYNIIHWNPRIFVALSPHYIVKFFNRTGKDGWISLGGVLLAITGTEAMFADLGHFSAASIRLAFAGVIYPCLVLQYMGQAAFLSKNIPAVHNSFYLSIPSALFWPMFVIATLAAIVGSQAIISATFSIVKQCLALGCFPRVKVVHTSRWIYGQIYIPEINWI…
37	681	Monocotyledons	Poales	Sorghum	Sorghum bicolor	12	SbHAK12	II:c	>Sbicolor_v1.0|Sb02g042930|Sb02g042930.1	MDPEFGVGTAPRKREAWRTTLLLAYQSLGVVYGDLSISPLYVYKSTFAEDITHSEGNEEIYGALSFVFWTLTLIPLLKYVTIVLRAHDNGEGGTFALYSLICRHANVCLLPNRQLADQDLSTYSLQRPHDAAGTCAPSPVKAWLENHTKLHTALLVMVMIGTCMVIGDGVLTPAISVFSAVSGLELSLSKDQHEYAVIPITCAILVFLFALQHYGTHRVGFLFAPIILAWLLCMSTIGLYNIIRWNPQIYTALNPSYMIRFLRKTKKSGWMSLGGILLCMTGSEAMFADLGHFSYSSIQLAFTSLVYPSLILGYMGQAAYLSQHHNLDASYQIGFYIAVPESVRWPVLVLAILASVVGSQAIISGTFSIINQSQSLSCFPRVKVVHTSDKVHGQIYIPE…
37	682	Monocotyledons	Poales	Sorghum	Sorghum bicolor	13	SbHAK13	II:a	>Sbicolor_v1.0|Sb03g015020|Sb03g015020.1	MQLHWTSLLLLAYQSCGVVYGDLSTSPLYVYKGTFSGSLHRFLDEETVFGVFSVVFWTITLIPLLKYVFIVLGADDNGEGGTFALYSLLVRHAKFSLMPNQQAADEELSAYYRPGYSTEDTPILKALRNFLEKHRKSRTFLLLMVLFGASLVIGDGVLTPAMSVLSSFSGLQVHSSALTHGEVVLLSCIVLVCLFTLQHWGTRRVAFLFAPVVVLWLLLLAALGIYNIAVWNPRILRAISPYYVVRFFQRTGKDGWISLGGVLLSMTGTEAMYADLGHFTAASIRVLVFVCVKAVPIPHVRCYERHLIGRIGPREYRMYRCVIRHGYKDVPGDDNDFENDLVVRIAEFVHMEAAEAAANADDPRNSDASVEGRMAVVDRPFDLSRTGLLMRAPLPNPED…
37	683	Monocotyledons	Poales	Sorghum	Sorghum bicolor	14	SbHAK14	II:a	>Sbicolor_v1.0|Sb03g015030|Sb03g015030.1	MWPTDPENGLSPKSTIGVDVYNPPPLHWTSLLLLAYQSCGVVYGDLSTSPLYVYKGTFSGSLHRFLDEETVFGVFSVVFWTITLIPLLKYVFIVLGADDNGEGGTFALYSLLVRHAKFSLMPNQQAADEELSAYYRPGYSTEDTPILKALRNFLEKHRKSRTFLLLMVLFGASLVIGDGVLTPAMSVLSSFSGLQVHSSALTHGEVVLLSCIVLVCLFTLQHWGTRRVAFLFAPVVVLWLLLLAALGIYNIAVWNPRILRAISPYYVVRFFQRTGKDGWISLGGVLLSMTGTEAMYADLGHFTAASIRIAFVGLIYPCLVLQYMGQAAFLSKSPHCNIHFIFFESIPRPVFWPVLVIATLAAIVGSQAVISATFSIVRQCTALGCFPRVKIVHTSNRIH…
37	684	Monocotyledons	Poales	Sorghum	Sorghum bicolor	15	SbHAK15	I:a	>Sbicolor_v1.0|Sb03g044780|Sb03g044780.1	MAEPQRTNNNGAANGNADSEYASEKLPPKRLQRFDSLHIEAGKIPGGPTHAAKVGWATTLHLAFQSIGVVYGDMGTSPLYVFSSTFTDGINNTDDLLGVMSLIIYTVILLPLIKYCFIVLRANDNGDGGTFALYSLISRYARISLIPNQQAEDAMVSRYKLESPTNRIKRAHWIKNKMENSPKFKITLFLVTVLGTSMVIGDGVLTPCISVLSAVGGIQQKATTLTQGQIAGISIAILIVLFLVQRFGTDKVGYTFAPIILTWFILIAGIGVYNLIKHDTSVLKAFNPKYIVDYFKRNGKQGWISLGGVILCITGTEAMFADLGHFNMRAIQIGFSVVLFPSVLLAYIGQAAYLRIYPENVANTFYKSIPGPLYWPTFVVAVAAAIIASQAMISGAFAI…
37	685	Monocotyledons	Poales	Sorghum	Sorghum bicolor	16	SbHAK16	I:a	>Sbicolor_v1.0|Sb03g044790|Sb03g044790.1	MTEPQHTSSNGAAHGDANSEHASHKMPPKRLQRFDSLHMEAGMIPGRSTHAAKVGWATTLHLAFQSIGVVYGDMGTSPLYVFSSTFTNGINNTDDLLGVMSLIIYTVILLPLIKYCFIVLQANDNGDGGTFALYSLISRYARISLIPNQQAEDAMVSHYKLESPTNRIKRAHWIKKKMENSPKFKVMLFLVTVLATSMVIGDGVLTPSMSVLSAVGGIQQKATNLTQGQIVGISIAILIVLFLVQRFGTDKVGYTFAPIILTWFLLIAGIGAYNLIKHDASVLKAFNPKYIVDYFKRNGKQGWISLGGVILCITGTEAMFADLGHFNVRAVQIGFSVVLFPSVLLAYIGQAAYLRIYPENVANTFYKSIPVAAAIIASQAMISGAFAIIAQSQVLGCFP…
37	686	Monocotyledons	Poales	Sorghum	Sorghum bicolor	17	SbHAK17	II:a	>Sbicolor_v1.0|Sb03g045180|Sb03g045180.1	MDAEAGVAGADQLPRRQYYMNLLLLAYQSFGVVYGDLSTSPLYVYKSTFSGKLSQYQDEETVFGVLSLIFWTFTLIPLLKYVTIVLSADDNGEGGPFALYSLLCRHAKLSLLPNQQAADEELSSYYRNGFAPRNGSSPWLKRFLEKHKKMRTVLLLIVLCGASMVIGDGVLTPAISVLSSMSGLQVRATGLEHSSVVLLSCIVLVGLFALQHRGTQKVAFMFAPIVIIWLLSIGGIGLYNIFHWNPNIYQALSPYYMVKFFRKTGKDGWIALGGILLSMTGSEAMFADLGHFTSASVRVAFITVIYPCLILQYMGHAAFLSKNTFHMPTSFYDTIPEPVFWPVFVVATLAAVVGSQAVISATFSIVKQCHALGCFPRVKVVHTSRWIYGQIYIPEINWI…
37	687	Monocotyledons	Poales	Sorghum	Sorghum bicolor	18	SbHAK18	I:a	>Sbicolor_v1.0|Sb04g021210|Sb04g021210.1	MSSSAEAESAAAAATERFQRHDSLYGDAEKVTNGKHHGSGDSWARTLMLAFQSIGVVYGDIGTSPLYVYSSTFPDGIRHPDDLLGVLSLILYTLILIPMLKYVFVVLHANDNGDGGTFALYSLISRYAKIRMIPDQQSEDATVSNYRVEAASSRLRRAQWLKEKLESSNAAKIGLFTITILGTSMVMGDGTLTPAISVLSAVSGIREKAPNLSQLEVVWISVAILFLLFSVQRFGTDKVGYSFAPIISVWFVLIAGTGMYNLAAHDATVLRAFNPMYIVDYFRRNGKEAWVSLGGAVLCITGTEAMFADLGHFNIRAIQISFTCILFPSVALCYMGQAAYLRKFPENVVDTFYKSIPVAMFWPAFLVAILAAIIASQAMLSGAFAILSKALSLGCFPRV…
37	688	Monocotyledons	Poales	Sorghum	Sorghum bicolor	19	SbHAK19	II:c	>Sbicolor_v1.0|Sb04g029030|Sb04g029030.1	MDLEAAGGGEAAQRKRRNGESWRATLLLAYQSLGVVYGDVATSPLYVYKSAFAGNDIQHSEGNEEIYGVLSFVFWTLTLITLVKYVLIVLRADVGGEGGTFALYSLICRHVRAGLLPGGGTRDELMEEDKVTGRRGERPVSRVRAVLEKYRVLQRLLLLFALLGTCMVIGDGVLTPAVSVFSAVSGLELSLEKEQHKYIELPVACAILICLFALQHYGTHKVGFLFAPIVCIWLLCISAIGLYNIIHWDHHVYRALSPYYMYQFLRKTQTGGWMSLGGILLCVTGSEAMYADLGHFSQSSIQIAFISLVYPALVLAYMGQAAFISQHHNIESSYHIGFYVSVPETLRWPVLVIAILAAVVGSQAIITGTFSIIKQCSSLSCFPGVKIVHTSSTVHGQIY…
37	689	Monocotyledons	Poales	Sorghum	Sorghum bicolor	20	SbHAK20	I:a	>Sbicolor_v1.0|Sb06g014930|Sb06g014930.1	MSSSLEVDNPGGGGGGGGESANRLSLKRHDSLFGDAEKVSGGKYHGSDGSWARTLHLAFQSVGIIYGDIGTSPLYVYSSTFPDGIKYNDDLLGVLSLIIYTLIVIPMLKYVFIVLYANDNGDGGTFALYSLISRYAKIRMIPNQQAEDAMVSNYSIEAPNSQLRTAQWFKQKLESSKAAKIVLFTLTILGTSMVMGDGTLTPAISVLSAVSGIKEKAPSLTQSQVVWISVAILFLLFSVQRFGTDKVGYTFAPVISVWFLLIAGIGLYNLVEHDIGVLRAFNPWYIVQYFKRNGKEGWVSLGGIILCVTGTEGMFADLGHFNIRAVQISFNGILFPSVALCYIGQAAYLRKFPDNVGDTFYKSIPAPLFWPTFIVAILAAIIASQAMLSGAFAILSKAL…
37	690	Monocotyledons	Poales	Sorghum	Sorghum bicolor	21	SbHAK21	I:a	>Sbicolor_v1.0|Sb06g014950|Sb06g014950.1	MALETDKQNPREAKKLGGKFQRHDSLYGDAERVSGTGYHGSECIGVIYGDIGTSPLYVYESTFTSGINNVDDLYGVLSLILYSMILLPMIKYVFIVLYANDNGDVLATPALQEHNVVGGTFALYSLISRYAKVSLIPNQQADDAMVSNYSLETVSAPMKRAQWTKKMLESSKVAKLVIFLLTVLGTSMVISDGVLTPAISVISAVSGLQQKAPHLKQDQMVWISVAILVVLFAVQRFGTDKVGYSFAPIILLWFLFIGGIGIYNLIKYDIGVLRAFYPKYIIDYFKTNGKDAWISLGGILLCFTGTEAMFADLGHFNIRSIQLSFSFILFPSVSLAYIGQAAFLRKHPEHVFDTFYKSIPGPLFWPTFIIAVSAAIIASQAMISGSFAIISQSQTLGCF…
37	691	Monocotyledons	Poales	Sorghum	Sorghum bicolor	22	SbHAK22	I:a	>Sbicolor_v1.0|Sb06g014960|Sb06g014960.1	MSLEVENPPGIETTKQLKRQDSLYGDAEKVSSFKHHGSEGGWSRLLHLAFQSIGIIYGDVGTSPLYAISSTFPDGIKNHDDLLGVLSLILYTLILIPMVKYVFIVLYADDNGDGGTFALYSLISRHAKVRLIPNQQAEDAMVSNYGIEAPNSQLRRAQWLKQKLESSKAAKIGLFTITILGTSMVMGDGTLTPAISVLSAVSGIREKVPSLTETQVVWISVPILFALFSVQRYGTDKVGYSFAPIITVWFFLIAAIGMYNLVVHEIGVLRAFNPMYIVDYFRRNGKEGWVSLGGVILCVTGTEGMYADLSHFSIKAIQISFSTVLLPSVALCYIGQTAYLRKFPESVADTFFRSIPEIMFWPTFIIAILSAIIASQAMLSGAFAILSKALSLGCFPSVQ…
37	692	Monocotyledons	Poales	Sorghum	Sorghum bicolor	23	SbHAK23	V	>Sbicolor_v1.0|Sb06g028130|Sb06g028130.1	MASSAESSAAGGMRKAPSLEWRWVSTEEDDDEDRAGAGTPAAVGAVGRGGSFESEDDEDDEEEEEEEKKKGRKRLIRTVPSVDWFDVEGNEVSVAQQLDDSEEFDFGRTMFLALQTLAVVFGDIGIGPLYTFDVMFTKYPIVGEDDVLGALSLVLYTLILMPLVKYVLVVLWANDDGEGGIFALYSLICRNAKVSLIPNQVQSEKRMSSFRLKLPTPELERSIKVKEKLESSLLLKKLLLGLVLFGTSMFISNGVITPAMSVLSAVSGLKVGLPNTSQDAVVMISVALLVVLFSVQRYATSKVGFAIGPSLLLWFCCLGGIGIYNLSLYGPTAFKAFNPLYIIYYFGRNPFQAWLSLGGCLLCATGSEAIFSNLCYFPVRYVQYMFVLLVLPCLVLAYL…
37	693	Monocotyledons	Poales	Sorghum	Sorghum bicolor	24	SbHAK24	III	>Sbicolor_v1.0|Sb06g028380|Sb06g028380.1	MASLSESELTNRGSMWELDQNLDQPMDEEAGRLKNMYREKKFSSALLLRLAFQSLGVVFGDLGTSPLYVFYNIFPRGIGEGEDEDVIGALSLIIYTLTLIPLLKYVFVVLRANDNGQGGTFALYSLLCRHAKINTIPNQHRTDEELTTYSRQTYEENSVAAKIKRWIESHAYKRNILLILVLIGTCTAIGDGILTPAISVLSASGGIKVQNQNMSTDIVVLVAVVILIGLFSMQHYGTDKVGWLFAPIVLLWFILIGSVGAINIHKYDNSVLKAYNPIYIYRFFQRRRNSDVWTSLGGIMLSITGTEALFADLCHFPVLAIQIAFTLIVFPCLLLAYTGQAAYIISNKTHVADAFYRSIPGAIYWPAFVIATAAAIVASQATISATYSIIKQALALGCF…
37	694	Monocotyledons	Poales	Sorghum	Sorghum bicolor	25	SbHAK25	III	>Sbicolor_v1.0|Sb07g006000|Sb07g006000.1	MLMASMSDSETTNRGSMWELDQNLDQPMDEEASQLKNMYREKKFSSILLLRLAFQSLGVVFGDLGTSPLYVFYNIFPHGVDEDEDVIGALSLIIYTLTLIPLMKYVFVVLRANDNGQGGTFALYSLLCRHAKVSTIPNQHKTDEELTTYSRQTYEENSLAAKVKKWLEGHAYKKNCLLILVLIGTCTAIGDGILTPAISVLSAAGGIRVQNQNMSTDVVVIVAVIILIGLFCMQHYGTDKVGWLFAPLVLLWFILIGSVGLVNIHKYNSSVLKAYNPVYTFRYFRRGKSEIWTSLGGVMLSITGTEALYADLCHFPVLAIQIAFTLVVFPCLLLAYTGQAAYIIDHKDHVVDAFYRSIPEAIYWPAFIIATLAAVVASQATISATYSIIKQALALGCFP…
37	695	Monocotyledons	Poales	Sorghum	Sorghum bicolor	26	SbHAK26	IV	>Sbicolor_v1.0|Sb07g022685|Sb07g022685.1	MATATASMDVEAGQGGNGKKGFYQDLLLAYKTLGVVFGGLVTSPLYVYPSMNLTNPTEEDYLGIYSIMFWTLTLIGVVKYICIALNADDHGEGGTFAMYSLLCQHANIGILPSKKIYTEEEQGLQVPARPVVVGRPSKLRRFIERSITAKRLLLLTAILGMCMLIGDGILTPAISVLSAIDGLRGPFPSVSKPTVEALSAGILISLFLLQKYGTSKVSFMFSPIMAAWTFTTPIIGVYSIWRYYPGIFKAMSPHYIVHFFVTNQKRGWQLLGGTVLCITGAEAMFADLGHFSKRSIQIAFLSSIYPSLVLTYAGQTAYLINHADDFGDGFYKFVPRPVYWPMFVVATLAAIVASQSLISATFSVVKQTVTCTVARLRELS
37	696	Monocotyledons	Poales	Sorghum	Sorghum bicolor	27	SbHAK27	V	>Sbicolor_v1.0|Sb07g027710|Sb07g027710.1	MEHRAAAPDDVIVQVNAAAVAAVDERISTGQITEEEVIGIDGGKQQIGGGGGGLTRRTFSQSYKMRHRNPVELTGWQLALLGYQSLGVVYGDIGTSPLYTFSSFTLPDPGADDVLGILSLILWTLTLVSLVKYVFIVLHADDHGEGGTFALYSLLRQHVNFSGKSMPVPVTRLASDANLKFHSKQSSLQPRMLKFLEGSPIAQAVITYLVLVGTCMVMGDGALTPSISVLSAVQGIQSRSSSIKQGHVVLLCVVILVILFLFQQYGTSKVGFTFSPIMLVWFALIASIGLHNMIKYYPPVLKAISPHYIYLFFARNKRAGWEQFGTVVLCITGAEAMFADLGHFNKKSIQMAYSCLVYPALILAYAGQAAFLIKNPSKLSTTFYSSVPDPLFWPMFIVA…
37	697	Monocotyledons	Poales	Sorghum	Sorghum bicolor	28	SbHAK28	II:c	>Sbicolor_v1.0|Sb10g009770|Sb10g009770.1	MDAESGRGAASARKKSWRSELVLAYQSLGVVYGEVATSPLYVYKSAFAGGDIDHSEGNEEIYGVLSLVFWTLTLITLLKYVLVVLRADDDGEGGTFALYSLICRRVRAGLLPGVVGDSSAADDELKEQRDGGALPPLASSVRAALQQRRELQWLLLMFALLGTSMVIGDGVLTPAVSVFSAVSGLKLSMVNEQHQYVLLPVTCVILVGLFALQHFGTHRVGFLFAPIVCLWLACISAIGVYNIFIWNPHIYKALSPYYMHSFIQKTQVGGWMSLGGILLCVTGSEAMYADLGHFSQSSIKIAFTMVVYPSLVLAYMGQAAYISQHHNFERNHHIGFYISVPEKIRWPVLGIAILAAVVGSQAVITGTFSVIKQCCSLNCFPRVKIVHTSSTVHGQIYIP…
37	698	Monocotyledons	Poales	Sorghum	Sorghum bicolor	29	SbHAK29	II:c	>Sbicolor_v1.0|Sb10g024660|Sb10g024660.1	MKSPPVMDPEAPPPPGTPPYDDEEEEEEEEEEKARGARKRVPWRMTLSLAYQSLGVVYGDLSTSPLYVYKAAFAEDIQHSESNDEILGVLSFVFWTLTLVPLLKYVCVVLRADDHGEGGTFALYSLLCRHARAALLPPGRTAAGEEDKFLDGATKKATAQNGNAATLGGGAAASVRRLLQRHKVLQRVLLVLALVGTCMVIGDGVLTPAISVFSAVSGLELSMEKEHHKYVELPIACIILVCLFALQHYGTHRVGFIFAPVVITWLLCISVIGVYNIIHWEPTVYRALSPYYMYKFLRKTQRGGWMSLGGILLCVTGSEAMFADLGHFNQLSIQIAFTCMVYPALILAYMGQAAYLCKHHNMETDYRIGFYVSVPEKIRWPVMAIAILAAVVGSQAVIT…
37	699	Monocotyledons	Poales	Sorghum	Sorghum bicolor	30	SbHAK30	II:b	>Sbicolor_v1.0|Sb10g026960|Sb10g026960.1	MDVKGSGGRPPAVQLQSTTKRRAASSPWGLQKATLLLAYQSFGVVYGDLCISPVYVYKNTFSGKLRLHEEDEEILGVLSLVFWSLTLIPLLKYIILVLGADDDGEGGTFALYSLMCRRSRMGLLNNINNGCLSVYNQKEPREELRSSLAIKSFIEKHYSLRVVLLLFVLMGTSMVIGDGVFTPTMSVLSAVSGLRIKFPELHENYTVLFACFILVVLFALQHYGTHRVGFLFAPILLAWLGCIGGIGIYNIFKWNRTVIRALSPYYIYNFFRKAGKDGWSSLGGIVLCITGAEAMFADLGHFSKLSLRLGFTIVVYPCLVLAYMGEAAYLSKHREDLQSSFYKALPDRVFWPVLIIATLATVVGSQAIISATFSIISQSRALGCFPRIKIVHTSSHVHG…
38	700	Monocotyledons	Poales	Foxtail millet	Setaria italica	1	SiHAK1	II:a	>Sitalica|Si004208m.g|Si004208m	MWPTDPEYGLSPNKNTIGVDVYNPPPLHWTSLLVLAYQSCGVVYGDLSTSPLYVYKGTFSGSLHRFLGEEAVVFGVFSVVFWTLTLIPLLKYVFIVLSADDNGEGGTFALYSLLVRHAKFSLMPNQQAADEELSAYYRPGYAATEDTPILRALRSFLERHRKSRTCLLLTVLFGASLVIGDGVLTPAMSVLSSFSGLRVHSSALTHGEVVILSCIVLVCLFTLQHWGTRRVAFLFAPVVVLWLLLLAALGVYNIVVWNPRILRALSPYYVVSFFQRTGKEGWISLGGVLLSMTGTEAMYADLGHFTAASIRVAFVGLIYPCLVVQYMGQAAFLSKSPDCNIHFIFFESIPRPIFWPVLVIATLAAIVGSQAVISATFSIVRQCTALGCFPRVKIVHTSN…
38	701	Monocotyledons	Poales	Foxtail millet	Setaria italica	2	SiHAK2	II:a	>Sitalica|Si000375m.g|Si000375m	MDAEAGVVGADQLPRRQYYMNLLLLAYQSFGVVYGDLSTSPLYVYKSTFSGKLRQYQDEETVFGVLSLIFWTFTLIPLLKYVTIVLSADDNGEGGPFALYSLLCRHAKLSLLPNQQAADEELSSYYRNGFAPRNGSAPWLRRFLEKHKKVRTVLLLVVLCGASMVIGDGVLTPAISVLSSMSGLQVRATGLEHRSVVLLSCIVLVGLFALQHRGTQKVAFMFAPIVIIWLFSIGGIGLYNILHWNPNIYQALSPYYMVKFFRKTGKDGWISLGGILLSMTGSEAMFADLGHFTSASVRVAFVTVIYPCLILQYMGHAAFLSKNTFHMPTGFYDTIPEPVFWPVFVVATLAAVVGSQAVISATFSIVKQCHALGCFPRVKVVHTSRWIYGQIYIPEINWI…
38	702	Monocotyledons	Poales	Foxtail millet	Setaria italica	3	SiHAK3	IV	>Sitalica|Si004956m.g|Si004956m	MKAVRLADDDLILEVGAEKSRPAGEVEHDETAGDESASGAAGRQTFSFSQAYKMRHREPMVFTKLQTMLLAYQSLGIVYGDLGTSPLYVFSSLVLPGAGEPDFLGVLSLILWTLTVMSLVKYVLIVLRADDHGEGGTFALYSLLRQHVNFKGDMPVPVTRHASDAGLRFHGERSGSPSRLHRWLEGSSLLQATVTCFVLFGTCMMIGDGALTPAISVLSAVQGIQSRSPNIKQEHVVILSVVILLLLFLVQRFGTNKVSASFSPIMLVWFGSIAVIGVYNIAKYYPPVLKAVSPHYIYYYFARNKKVGWEQLGAIILCITGAEAMFADLGHFNKSSIQVAFSTVVYPSLILAYSGQAAYLIKHPSELSTTFYSSIPGPLFWPMFVVATLAAIVASQALI…
38	703	Monocotyledons	Poales	Foxtail millet	Setaria italica	4	SiHAK4	I:a	>Sitalica|Si000392m.g|Si000392m	MAEPQHTSSNGAAHSDADSEYASEKMPPKRLQRFDSLHMEAGKIPGGSTHAAKVGWATTLHLAFQSIGVVYGDMGTSPLYVFSSTFTNGINNTDDLLGVMSLIIYTVILLPLIKYCFIVLRANDNGDGGTFALYSLISRYARISLIPNQQAEDAMVSRYKLESPTNRIKRAHWIKNKMENSPKFKVMLFLVTVLATSMVIGDGVLTPCISVLSAVGGIKQKATTLTQGQIAGITIAILIVLFLVQRFGTDKVGYTFAPIILTWFILIAGIGVYNLSKHDTSVLKAFNPKYIVDYFKRNGKQGWISLGGVILCITGTEAMFADLGHFNVRAVQIGFSVVLFPSVLLAYIGQAAYLRIHPENVANTFYKSIPGPLYWPTFVVAVAAAIIASQAMISGAFAI…
38	704	Monocotyledons	Poales	Foxtail millet	Setaria italica	5	SiHAK5	II:c	>Sitalica|Si034304m.g|Si034304m	MDLEFGRGLRSPKRDSWKTTLLLAYQSLGVVYGDLSISPLYVYKSTFAEDIQHSETNEEIFGVLSFVFWTLTLIPLIKYVSIVLRADDNGEGGTFALYSLICRHANVSLLPNRQIADEELSTYKLECPPEITDKSHIKVWLEKHRKLRIALLIMVMIGTCMVIGDGVLTPAISVFSAVSGLEFSLSKDHREYAVIPITCVILAFLFALQHYGTHRVGFLFAPIVLAWLFCMSAVGLYNIIHWNPQVYQALNPYYMFKFLKKTRKYGWMSLGGILLCMTGSEAMFADLGHFSYSAIQLAFTCLVYPALILAYMGQAAYLSKHHDFYSSSQVGFYIAVPDKIRWPVLVLAILASVVGSQAIISGTFSIINQSQSLSCFPRVKVVHTSEKIHGQIYIPEINW…
38	705	Monocotyledons	Poales	Foxtail millet	Setaria italica	6	SiHAK6	I:a	>Sitalica|Si034290m.g|Si034290m	MAHHHASAAAARGSMEIVPYSSELDLELPPVDVKRQDSLYRDANMPAAHAGHHGQESWVRTLRLAFQCVGILYADLGTSPLYVYANTFKKGVGHPDDVLGVLSIIIYSFILFTMIKIVFIALYANDEGDGGTFALYSLISRYAKVCLIPNQQAEDELVSRYRHRAKPSATLRRAQWMKNLLETSKAAKVSLFFLTIFATALAISDSMLTPPISVLAAVNGLKLRAPHLTTDQTVWITVGILVVLFAVQRFGTDKIGYTFAPVVFVWLLLMAGIGIYNMVKYDIGTLKAFNAKYIIDYFRRNKKKGWVSLGEILLCFTGTEALFADLGYFSIRSIQLSFTFGLLPSVLLTYIGQAAYLRKHMDMADISNVFFNSIPSSLFWPTFVLALIASVIGSQAMIS…
38	706	Monocotyledons	Poales	Foxtail millet	Setaria italica	7	SiHAK7	I:a	>Sitalica|Si034300m.g|Si034300m	MVLAAERDGQFEVIDIESGLDGAFSIVDRQDSLFREAVRGHHHRAGEGHSEQDSWWRTLRLAFQCVGILYGDVGTSPLYVYSTAFDHGVGHPDDILGVLSLIIYSFMLFTVIKIVFVALHANDDGDGGTFALYSLISRHAKVSLIPNHQVEDELVSSYSRHGKPSATLRRANWLRHLLETSKSAKISLFLLTILAIAMVISDAVLTPPISVLSAVSGLKEKVPDLTTDQIVWITVAILIVLFAIQRFGTDKVGYSFAPIILLWLLLIGGVGLHNLIKYDVGVLRSFNPKYIIDYFRRNKKEGWVSLGDILLVFTGTEALFANLGYFSIRSIQLSFSFGLLPSILLTYIGQAAYLRKHPEHFADTFYRSVPSTLFWPTFILAIAASIIGSQAMISCAFAT…
38	707	Monocotyledons	Poales	Foxtail millet	Setaria italica	8	SiHAK8	I:a	>Sitalica|Si034309m.g|Si034309m	MAHADAGGGLEIVPHSGDLELDLPPPGNSLRQDSLYRDATRPAHHAGHHGQESWVRTLRLAFQCVGIMYADLGTSPLYVYSNTFKKGVGHPDDVLGVLSIIIYSFILFTMIKIVFIALHANDEGDGGTFALYSLISRYARICLIPNQQAEDELVLRYKHHPKPSATLRRAQWMKNLLETSKFAKITLFFLTILATALAISDCMLNPPISVLAAVNGLKLRAPHLTKDAEVWITVGILVVFFSVQRFGTDKIGYTFAPVVTLWLLLISGIGLYNVIKYDIGTLRAFNPKYIINYFRRTKKKGWVSLGEILLCVTGTEALFADLGYFSIRSIQLSSTFGLLPSVLLTYIGQAAYLRKHMDMDISNAFFNSVPSSLFWPTFILALITAVIGSQAMVSCAFAT…
38	708	Monocotyledons	Poales	Foxtail millet	Setaria italica	9	SiHAK9	I:a	>Sitalica|Si034303m.g|Si034303m	MAQAADRGSSREDIVIVDLESEVDAPPAMQRQDSLYVAATRAAGANNHGQDSWARTVRLALQCVGILYGDIGTSPLFVYSSTFRDGVGHPDDLLGALSLIIYSFLLFTVVKYVYIALRANDDGDGGTFALYTLISRHAKVSLIPNQQAEDELVSKYNRAKPPATLRRAQWMKELLETNKAVKISLFLLTMLATAMVISDAVLTPAISVLSAVGGLKEKAPYLTTDEIVWITVGILVVLFAIQRFGTDKVGYLFAPVILLWLLLIGGVGVYNLIKYDTGVLRAFNLKYIIDYFRRNKKKGWVSLGGILLCFTGTEALFSDLGYFSIRSIQLSFGFGLVPSVLLAYIGQAAYLRMHLEDVANSFYRSTPISLFWPTFILAIAASIIGSQAMISCAFATISH…
38	709	Monocotyledons	Poales	Foxtail millet	Setaria italica	10	SiHAK10	II:c	>Sitalica|Si016378m.g|Si016378m	MDLEAAGGAAAAHGKRWRGESWRATLLLAYQSLGVVYGDVATSPLYVYKSAFAGNDIQHSAGNEEIYGVLSFVFWTLTLITLLKYVLIVLRADDGGEGGTFALYSLICRHVRAGLLPGGGTRDELMEEEKATGRRGERPVSRIRAVLEKYRVLQRLLLLFALLGTCMVIGDGVLTPAVSVFSAVSGLELSMEKEQHKYIELPVACAILICLFALQHYGTHKVGFLFAPIVCIWLLCISAIGLYNIIHWDHHVYRALSPYYMYQFLKKTQTGGWMSLGGILLCVTGSEAMYADLGHFSQSSIQIAFISVVYPALVLAYMGQAAFISQHHNFESSYHIGFYVSVPESLRWPVLVIAILAAVVGSQAIITGTFSIIKQCSSLSCFPGVKIVHTSSTVHGQIY…
38	710	Monocotyledons	Poales	Foxtail millet	Setaria italica	11	SiHAK11	I:a	>Sitalica|Si020215m.g|Si020215m	MSAAEAAAESPAAAAERLKRHDSLYGDAEKVSGDKCHGSGGSWARTLMLAFQSVGVVYGDIGTSPLYVYSSTFPDGIRHPDDLLGVLSLILYTLILIPMLKYVFVVLHANDNGDGGTFALYSLISRYAKIRMIPDQQTEDATVSNYGVEAPSSRLRRAQWLKEKLESSKAAKIGLFTITILGTSMVMGDGTLTPAISVLSAVNGIREKAPNLTQLEVVWISVAILFVLFFVQRFGTDKVGYSFAPIISVWFLLIASTGMYNLAVHDVTVLRAFNPMYILQYFSRNGKEAWVSLGGVILCITGAEAMFADLGHFNIRAIQISFTCILFPSVSLCYMGQAAYLRRFPENVADTFFKSIPAPMFWLVFVVAIMAAIIASQAMLSGAFAILSKALSLGCFPPV…
38	711	Monocotyledons	Poales	Foxtail millet	Setaria italica	12	SiHAK12	III	>Sitalica|Si015735m.g|Si015735m	MASISDSETTNRGSMWELDQNLDQPMDEEASQLKNMYREKKFSSILLLRLAFQSLGVVFGDLGTSPLYVFYNIFPHGVDDDEDVIGALSLIIYTLTLIPLMKYVFVVLRANDNGQGGTFALYSLLCRHAKVSTIPNQHKTDEELTTYSRQTYEENSLAAKVKRWLEGHAYKKNCLLILVLIGTCTAIGDGILTPAISVLSASGGIRVQNQNMSTDVVVIVAVVILIGLFCMQHYGTDKVGWLFAPLVLLWFILIGSVGVVNIHKYNSSVLRAYNPVYIFRYFRRGKSEIWTSLGGVMLSITGTEALYADLCHFPVLAIQIAFTLVVFPCLLLAYTGQAAYIIDHKDHVADAFYRSIPGAIYWPALIIATLAAVVASQATISATYSIIKQALALGCFPRV…
38	712	Monocotyledons	Poales	Foxtail millet	Setaria italica	13	SiHAK13	IV	>Sitalica|Si015728m.g|Si015728m	MEHHAPPPDDVIVQVNAAAVAAVDERSSTSQIEEVGGDDDIKFIGAAGGLTRRTFSESYRIRHRNPLEFTPWQVALLGYQSLGVVYGDIGTSPLYTFSSFTLPDPSKDDLLGILSLILWTLTLVSLVKYVFIVLHADDHGEGGTFALYSLLRQHVNFTGKKMPVPVTRLASDSNLKFHSKKSSLQPRMLKFLEGSVIAQAVITYLVLIGTCMVMGDGALTPSISVLSAVQGIQSRSSRITQGHVVLLCVIILVFLFLYQRYGTSKVSFTFTPIMLVWFVLIASIGLYNMIKYYPPVLKAISPHYIYMFFAKNKKAGWEQLGTVVLCITGAEAMFADLGHFNKKSIQMAYSCLVYPSLILAYAGQAAFLIKNPSKLSSTFYSSIPEPLFWPMFVVATLSA…
38	713	Monocotyledons	Poales	Foxtail millet	Setaria italica	14	SiHAK14	I:a	>Sitalica|Si020681m.g|Si020681m	MVNDDMESGGGCERKKPASSSCSDDMAELDRALAAVELPTTVQRQDSLYRDASRAGGHGQQGQQEGWARTLRLAFQCVGVLYGDIGTSPLYVYSSTFTGGIRHTDDLLGVLSLIIYSFLLFTIIKYVYIALRANDDGDGGTFALYSLISRHAKVSLVPNHQAEDELTHADDDDAAVLKSSSLRGSLRRRTVQLASPRDQRAQWLKDLLETSKPVRISLFLLTVLATAMVITDACLTPAISVLSAVGGLKEKAPNLTTEQIVWMTVGILLVLFGVQRFGTDKVGYLFAPVVLLWLLLIGGVGVYNLLRHDVGVLRAFNPRYIVDYFRRNGRDAWVSLGGVLLCFTGTEALFADLGYFSVRSIQLSFACGLVPAVLLAYMGQAAFLRRHPAQVAETFYRST…
38	714	Monocotyledons	Poales	Foxtail millet	Setaria italica	15	SiHAK15	I:a	>Sitalica|Si009457m.g|Si009457m	MSLEVEDRPSVETTKQLKRQDSLYGDAEKVSSAKYHASEGSWSRLLQLAFQSVGIIYGDVGTSPLYTLSGTFPNGIKNHDDLLGVLSLILYTLILIPMVKYVFIVLYADDNGDGGTFALYSLISRHAKVRLIPNQQAEDAMVSNYGIEVPSSQLRRAQWLKKKLESSNAAKIGLFTITILGTSMVMGDGTLTPAISAQIVWISVPILFVLFSVQRYGTDKVGYSFAPIITVWFVLIAGIGMYNLVVHEIGVLRAFNPMHIVDYFRRNGKEGWISLGGVILCVTGTEGMFADLGHFNIKAIQISFNTVLFPSVALCYMGQVAYLRKFPEDVADPFFRSIPAPMFWPTFVIAILSAIIASQAMLSGAFAILSKALSLGCFPSVQVIHTSKSYEGQVYIPEV…
38	715	Monocotyledons	Poales	Foxtail millet	Setaria italica	16	SiHAK16	I:a	>Sitalica|Si012185m.g|Si012185m	MSLEVENPASTETTNRLSLKRHDSLFGDAEKVSGTTYHGSAGSWARTLHLAFQSIGIIYGDIGTSPLYVYSSTFPDGIRNNDDLLGVLSLIIYSLILLPMLKYVFIVLYADDNGDGGTFALYSLISRYAKVRMTPDQQAEDTIVSNYSIEAPSSQLKRAQWLKQMLESSKAAKIALFTLTILGTSMVMGDGTLTPAISVLSAVSGIKQKAPSLTQTQVVWISVAILFMLFSVQRFGTDKVGYCFAPIISIWFLLIAGIGMYNLIVNDIGVLRAFNPMYIVHYFKRNGKDGWISLGGVVLCVTGTEGMYADLGHFNIRAVQISFNCVLFPSVALCYIGQAAYLRKFPENVADTFYRSIPGSLFWPTFVVAILAAIIASQAMLSGAFSILSKAISLGCFPR…
38	716	Monocotyledons	Poales	Foxtail millet	Setaria italica	17	SiHAK17	I:a	>Sitalica|Si009421m.g|Si009421m	MSLEVENPGGGESANRLSLKRHDSLFGDAEKVSHGKYHGSEGSWARTLHLAFQSVGIIYGDIGTSPLYVYSSTFPDGIKYNDDLLGVLSLIIYTLIIIPMLKYVFIVLYANDNGDGGTFALYSLISRYAKIRMIPNQQAEDAMVSNYSIEAPNSQLRRAQWFKQKLESSMVAKIVLFTLTILGTSMVMGDGTLTPAISVLSAVSGIREKAPNLTQTEVVWISVAILFMLFSVQRFGTDKVGYTFAPVISVWFLLIAGIGLYNLVVHDIGVLRAFNPWYIVQYFKRNGKDGWVSLGGVILCVTGTEGMFADLGHFNIRAVQISFSGILFPSVTLCYIGQAAYLRKFPENVGDTFYRSIPGPLFWPTFVVAILAAIIASQAMLSGAFAILSKALSLGCLPR…
38	717	Monocotyledons	Poales	Foxtail millet	Setaria italica	18	SiHAK18	V	>Sitalica|Si009581m.g|Si009581m	MSSFRLKLPTAELERSIKVKEKLESSLLLKKLLLGLVLFGTSMFISNGVITPAMSVLSAVSGLKVGIRNASQDVVVMISVALLVILFSLQRYATSKVGFALGPSLLVWFCCLGGIGIYNLSLYGPTAFKAFNPLYIIYYFGRNPFQAWLSLGGCLLCATGSEAIFSNLCYFPVRYVQYMFVLLVLPCLVLAYLGQAAFLIANPKSSEQVFFSSIPSGVFWPVFLLANLAALIASRTMTVAIFQCLKQSIALGCFPRLKIVHTSRKFMAKIYIPVVNWFLLVSCLGFIVLFRSVYDVGNAYAIAELGVMIMATVYVTIIMLLIWESNITKVLLFFITFLFLELIFFSSALSSVGDGGWAFLIFASVLLLIMFIWNYGSKLKYDSEVKQKLSKDLMRKLGP…
38	718	Monocotyledons	Poales	Foxtail millet	Setaria italica	19	SiHAK19	III	>Sitalica|Si009378m.g|Si009378m	MASLSESEVTNRGSMWELDQNLDQPMDEEAGRLKNMYREKKFSSVLLIRLAFQSLGVVFGDLGTSPLYVFYNIFPRGVDDDEDVIGALSLIIYTLTLIPLLKYVFVVLRANDNGQGGTFALYSLLCRHAKINTIPNQHRTDEELTTYSRQTYEENSVAAKIKRWLEAHAYKRNILLILVLIGTCTAIGDGILTPAISVLSASGGIKVQNQNMSTDVVVLVAVVILIGLFSMQHYGTDKVGWLFAPIVLLWFILIGSVGAVNIHKYNNSVLKAYNPVYVYRFFRRRWNSDIWTSLGGVMLSITGTEALFADLCHFPVLAIQIAFTLIVFPCLLLAYTGQAAYIISHKQHVADAFYLSIPDAIYWPAFVIATAAAIVASQATISATYSIIKQALALGCFPR…
38	719	Monocotyledons	Poales	Foxtail millet	Setaria italica	20	SiHAK20	I:a	>Sitalica|Si012684m.g|Si012684m	MALETDQQDPARGTKRVVGILQRHDSLYGDAEKVSSAQHHGSQDNWIRTLRLAFQCIGVIYGDIGTSPLYVYASTFSSGISNIDDLYGVLSLILYSIILLTMIKYVFVVLYANDKGDGGTFALYSLISRYAKVSLIPNQQAEDAMVSSYGLDIVSAPMRRAQWMKKNLESSKVAKVAIFLLTILGTSMVISDGALTPAISVLSAVSGLQQKAPQLKQGQIVLISVVILVVLFSVQRFGTDKVGYSFAPIILLWFLCIGGIGFYNLIKYDVGVLRAFYPKYIVDYFKRNGKDAWISLGGILLCFTGTEAMFADLGHFNVRAVQISFSFALFPAVSLAYIGQAAFLRKHPEHVLDTFYRSIPGPLFWPTFVIAVAAAIIASQAMISGSFSIIQQSQTLGCF…
38	720	Monocotyledons	Poales	Foxtail millet	Setaria italica	21	SiHAK21	II:c	>Sitalica|Si005895m.g|Si005895m	MVTRALEGGPMDAESGRGAAGARKKSWRSELVLAYQSLGVVYGEVVTSPLYVYRSAFAGGDIEHSEGNEEIYGVLSLVFWTLTLVTLLKYVLVVLRADDDGEGGTFALYSLICRQVGAGLLPGGDGDDDLKEQRNGAAPPPASSVRKALQQRRGLQWLLLLFALLGTSMVIGDGVLTPAVSVFSAVSGIKLSMVNEQHQYVLLPVTCVILVGLFALQHFGTHRVGFLFAPIVCLWLLCISIIGVYNIVFWNPHVYKALSPYYSYRFLQKAQVGGWMSLGGILLCVTGSEAMYADLGHFSQSSIKLAFTAVVYPSLVLAYMGQAAYISQHHSFEKNHHIGFYVSVPEKIRWPVLVIAILAAVVGSQAVITGTFSVIKQCCSFNCFPRVKIVHTSSTVHGQ…
38	721	Monocotyledons	Poales	Foxtail millet	Setaria italica	22	SiHAK22	II:b	>Sitalica|Si006705m.g|Si006705m	MFLCLAVTVGFRDTEMIGNAYGLSVILVMFATTCLMFLVITTVWNRNVLLAGLFTLGFGSIELTYLSACLAKVPHGGWLPLLLSLVTLLTMSTWHYGTKKKEEYELQNKVCLDRFLSLSSGMGLVRVPGVGFIYSSAVNGVPPMFAHFVTNFPAFHRVLIFVSIQTLTVPKVSPDERFLVGRVGPPANRLFRCVVRYGYKEGRWDHFNFENQLLMKVVEFLQLQPQEDAAEPPSDSGELSVIPASPRTHHQLADAGTASSASYSGGSSCEIDAGVMSRRVRFEEPWSGGEEGDAAAERNGEVKTLMEERESGVSYMIGHTCVEAHESSPAVKKFAINVVYGFLRRNSRRPAAELGVPHTSLIEVGMTYRV*
38	722	Monocotyledons	Poales	Foxtail millet	Setaria italica	23	SiHAK23	II:c	>Sitalica|Si005871m.g|Si005871m	MKSPPAMDPEAPPPPPGTPPDEEEEKRGGRKGVPWRMTLSLAYQSLGVVYGDLSTSPLYVYKAAFAEDIQHTESNEEILGVLSFVFWTLTLVPLLKYVCIVLRADDNGEGGTFALYSLLCRHARAALLPPGRAAAGDDDQLLDAAAAGAAKKAAAENGNAVTLGGRGGGAAASVRRLLERHKVLQRVLLVLALVGTCMVIGDGVLTPAISVFSAVSGLELSMEKEHHKYVELPIACIILVCLFALQHYGTHRVGFIFAPIVITWLLCISMIGVYNIIHWEPTVYRALSPYYMYKFLRKTQRGGWMSLGGILLCVTGSEAMFADLGHFNQLSIQIAFTCMVYPALILAYMGQAAYLCRHHIMESDYRIGFYVSVPEKIRWPVLAIAILAAVVGSQAVITG…
38	723	Monocotyledons	Poales	Foxtail millet	Setaria italica	24	SiHAK24	I:a	>Sitalica|Si008073m.g|Si008073m	MDVEGGGLPAVQSTARRTSSSWGLQKATLLLAYQSFGVVYGDLCISPVYVYKNTFSGKLRLHEEDEEILGVLSLVFWSLTLIPLLKYIILVLGADDNGEGGTFALYSLMCRRSRMGLLNNIHQGPLSAYSQKEPREELKSSLAIKGFFEKHFSLRIVLLLFVLMGTSMVIGDGVFTPTMSVLSAVSGLRIKFPELHENYTVLFACFVLIGLFALQHCGTHRVGFLFAPILLAWLACIGGIGIYNIFKWNPSVIRALSPYYIYNFFRKAGRDGWSSLGGIVLCITGAEAMFADLGHFSKLSLRLGFTIVVYPCLVLAYMGEAAYLSKHREDLQSSFYKALPGEVVMFCQID*
38	724	Monocotyledons	Poales	Foxtail millet	Setaria italica	25	SiHAK25	II:c	>Sitalica|Si028982m.g|Si028982m	MDTEFGVGMAPRKRESWRTTLLLAYQSLGVVYGDLSISPLYVYKSTFAEDITHSETNEEIYGALSFVFWTLTLIPLIKYVTIVLRADDNGEGGTFALYSLICRHANVSLLPNRQVADEELSTYKLECPPEVAQRSRVKEWLEKHKKLHTALLVMVMIGTCMVIGDGVLTPAISVFSAVSGLELSLSKHQHEYAVIPITCAILVFLFALQHYGTHRVGFLFAPIVLCWLLCMSAIGLYNIIHWNPHVYQALNPCYMITFLKKTRKSGWMSLGGILLCMTGSEAMFADLGHFSYSAIQLAFTSLVYPSLILGYMGQAAYLSKHHNFDASYQIGFYIAVPESVRWPVLVLAILASVVGSQAIISGTFSIINQSQSLSCFPRVKVVHTSAKIHGQIYIPEVNW…
38	725	Monocotyledons	Poales	Foxtail millet	Setaria italica	26	SiHAK26	IV	>Sitalica|Si029077m.g|Si029077m	MRTGAHVDLEAGHLSSRRGGASAASAAAAADRDRAETEGGNFRKDLFLAYKTLGVVFGGLVTSPLYVYPSMNLASPTKDDYMGLYSIMFWTLTLIGVVKYVGIALNANDHGEGGTFAMYSLLCRHADIGILPSKKVYSEDEPLLHNQSAIDRRPSWLGKFFERSITARRVLLFMAILGMCMLIGDGILTPAISVLSAINGLRAPFPSVSKSVVEALSAAILIGLFLLQKYGTSKVSFLFSPIMAVWTFTTPIIGVYSIFNYYPGIFKAISPHYIVRFFLRNKKEGWRMLGGTVLCITGAEAMFADLGHFSKKGIQIAFLSSIYPSLVLTYAGQTAYLINNVNDYSDGFYKFVPRPVYWPMFVITTLAAIVASQSLISATFSVIKQSVVLDYFPRVKVVH…
38	726	Monocotyledons	Poales	Foxtail millet	Setaria italica	27	SiHAK27	V	>Sitalica|Si028916m.g|Si028916m	MESGSGGRRLRKTESAEMRWVVPGGACEEDEIESSDDGGGGADTPAAALGSRGGGCSDDDDDDGYEEDEMLRQRLVRTGPRADSFDVEALDVPGVYRHQEFTFGRSIVLTLQTLGVVFGDVGTSPLYTLDVMFNKYPITSKEDVLGALSLVIYTLILIPFLKYTLIVLWGNDDGEGGTFALYSLICRNAKASLLPNQLPSDTRISSFNLKVPSVELERSLKIKERLETSSMLKKLLLMLVLFGTSMVIADGVVTPAMSVMSAVNGLKVGISSVNEGEVVMITVAFLIVLFSLQRFGTSKVGLAVGPALFIWFCCLAGIGIYNIRIYGSEVLHAFNPVYIYYYFERNPTQAWMSLGGCLLCATGSEAMFADLCYFSVRSVQLTFVFLVLPCLLLGYLGQA…
38	727	Monocotyledons	Poales	Foxtail millet	Setaria italica	28	SiHAK28	II:a	>Sitalica|Si028991m.g|Si028991m	MDEEIGAARQVQWKSYCKTLSLLAFQSFGVVYGDLSTSPLYVYSNTLSGRLNSYLDETTIFGLFSLIFWTLTLVPLLKYVIIVLSADDNGEGGTFALYSLLCRHAKFSLLPNQQAADEDLSTYYQPGTDRNVISSPFKRFLEKHRKLRTCLLLFVLFGACMMIGDGVFTPTISVFSAISGLRDPDISKLADGWILFITCVVLVGLFALQHRGTHRVAFMFAPIVVLWLLSIGSIGLYNIIRWNPRIFVALSPHYIVKFFKTTGRDGWISLGGVLLAITGTEAMFADLGHFTAASIRLAFVGVIYPCLVLQYMGQAAFLSKNLTAVDNSFYLSVPDPLFWPVFVIATLAAIVGSQAIISATFSTVKQCLALGCFPRVKVVHTSRWIHGQIYIPEINWILM…
38	728	Monocotyledons	Poales	Foxtail millet	Setaria italica	29	SiHAK29	V	>Sitalica|Si028913m.g|Si028913m	MDDGGIQEEPPTERFLTPTRSGGSRWVDGSEVDSSESASWSLGDERSGATTSAEWGAAASAGAPASRVSSGTFRRRLGKRPRRVDSLDVEAMNVRGAHGHSSKELSMVSTIAMAFQTLGVVYGDMGTSPLYVFSDVFSKVPIKSEVEILGALSLVMYTIALIPFAKYVFIVLKANDNGEGGTFALYSLICRYAKVSLLPNQQRVDEDISSFRLKLPTPELERAMFVKDCLEKKPLFKNILLFLVLMGTSMVIGDGILTPSMSVMSAVSGLQGQVRGFDTDAVVIVSIIVLVLLFSVQRFGTGKVGFMFAPILGLWFLNLGSIGIYNIVKYDISVVRAFNPVYIYLFFATNGLKAWSALGGCVLCITGAEAMFADLGHFSVKSIQIAFTAIVFPCLLIAY…
38	729	Monocotyledons	Poales	Foxtail millet	Setaria italica	30	SiHAK30	III	>Sitalica|Si028983m.g|Si028983m	METTSSTNEDTGRGTMWELERNLDQPMDAEAGRLRNMYREKTYPTLVLLQLAFQSLGVVFGDLGTSPLYVFYNIFPHEIEDTEQVIGALSLIIYSLTLIPLVKYVFIVLRANDNGQGGTFALYSLLCRHAKINTIPNQHRTDEDLTTYSRHTYDEKSLAASIKRWLEGHQLRKNVILIIVLFGTCMAVGDGILTPAISVLSATGGIQVEEPKMRNDVVVIVSVVILIGLFSMQHFGTDKVSWLFAPIVLVWFILIGILGAVNIYKYDRSVLKAFNPIYVYRYFKRGRTSWASLGGIMLSITGTEALFADLSYFPVQAIQIAFTVVVFPCLLLQYTGQAAYIAQNTHSVPHAFYYSLPASILWPSFIVATAAAIVASQATISMTYSIIKQALALGCFPRV…
39	730	Monocotyledons	Poales	switchgrass	Panicum virgatum	1	PvHAK1	IV	>Pvirgatum_v1.1|Pavir.Fa00431|Pavir.Fa00431.1	MEHHAPPAPDDVIIQVSAAAVAAVDDRSSTSQIEEVGDGGDDDVKTIIGGAGGLTRRTFSESYRMRHRNPMEFTPWEVALLAYQSLGVVYGDIGTSPLYTFSSFTLPDPDQDDLLGILSLILWTLTLVSLVKYVFIVLHADDHGEGGTFALYSLLRQHVNFTGKRMPVPVTRLASDANLKFHSKKSSLQPRMLRFLEGSVIAQAVITYLVLIGTCMVMGDGALTPSISVLSAVQGIQSRSSRITQGHVVLLCVIILVFLFLYQRYGTSKVSFSFSPIMLVWFVLIASIGLYNIIKYYPPVLKAISPHYIYIFFAKNKRAGWEQLGTVVLCITGAEAMFADLGHFNKKSIQMAYSCLVYPSLILAYAGQAAFLIKNPSKLSTTFYSSIPEPLFWPMFIVA…
39	731	Monocotyledons	Poales	switchgrass	Panicum virgatum	2	PvHAK2	III	>Pvirgatum_v1.1|Pavir.Fa01741|Pavir.Fa01741.1	MLMASISDSEATNRGSMWELDQNLDQPMDEEASQLKNMYREKKFSSILLLRLAFQSLGVVFGDLGTSPLYVFYNIFPHGVDDDEDVIGALSLIIYTLTLIPLMKYVFVVLRANDNGQGGTFALYSLLCRHAKVSTIPNQHKTDEELTTYSRQTYEENSLAAKVKRWLEGHAYKKNCLLILVLIGTCTAIGDGILTPAISVLSASGGIRVQNQNMSTDVVVIVAVIILIGLFCMQHYGTDKVGWLFAPLVLLWFILIGGVGVVNIHKYNSSVLKAYNPVYLFRYFKRGKSEIWTSLGGVMLSITGTEALYADLCHFPVLAIQIAFTLVVFPCLLLAYTGQAAYIIDHKDHVADAFYRSIPGAIYWPAFIIATLAAVVASQATISATYSIIKQALALGCFP…
39	732	Monocotyledons	Poales	switchgrass	Panicum virgatum	3	PvHAK3	I:a	>Pvirgatum_v1.1|Pavir.J11387|Pavir.J11387.1	MLSGAFAILSKALSLGCLPRVQVIHTSKKYEGQVYIPEVNFMMGLASIIVTIAFRTTTSIGNAYGICVVTTFSITTHLVTVVMLLIWKKNIIFVLLFYVVFSCTELIYLSSILSKFIQGGYLPFCFALVLMTLMASWHYVHVKRYWYELDHIVPTNQMTTLLEKNDVRRIPGVGLLYTELVQGIPPVFPRLIKKIPSVHSIFLFMSIKHLPIPHVVPAERFLFRQVGPREHRMFRCVARYGYSDSLEEPKEFAGFLVDRLKMFIHEEIAFAQNDAENEDETTSITDVPEAQARPRRSTNSVVHSEEAIEPRVSSNSGRITVHANQIVEEEKQLIDREVERGVVYLMGEANVSAGPKSSILKKIVVNYIYTFLRKNLTEGHKALAIPKDQLLKVGITYEI*
39	733	Monocotyledons	Poales	switchgrass	Panicum virgatum	4	PvHAK4	II:b	>Pvirgatum_v1.1|Pavir.Da00198|Pavir.Da00198.1	MFLCLAVTVGFRDTEMIGNAYGLAVILVMLATTCLMFLVITTVWNRNVLLAALFTVGFGSIELMYLSACLAKVPHGGWLPLLLSLVTLLAMSTWHYGTKKKKEYELQNKVCLDRFLSLSSGIGLVRVPGVGFVYSSAVNGVPPMFAHFVTNFPAFHRVLIFVSIQTLTVPKVSPDERFLVGRVGPPANQLFRCVVRYGYKEGRWDHFNFENQLLMKVVEFLETQEEAADSGELSVIPASPRAQQLVDVDAAPTASCSSSSACEIDPGVVSKRVRLEERAGAGEEEEGEMKSGEVKTLLEERESGVSYMIGHTCVQAHESSPAVKKFAVNVVYGFLRRNSRRPAAELGVPHTSLIEVGMTYTV*
39	734	Monocotyledons	Poales	switchgrass	Panicum virgatum	5	PvHAK5	II:c	>Pvirgatum_v1.1|Pavir.Da00908|Pavir.Da00908.1	MDAAESSRGAAGARKKSWRSELVLAYQSLGVVYGEVVTSPLYVYKSAFAGGDIEHSEGNEEIYGVLSLVFWTLTLITLLKYVLVVLRADDDGEGGTFALYSLICRRVGAGLLPGAGDDLKGQRGGAAPPPASSVRTALQQRRELQWLLLLFALLGTSMVIGDGVLTPAVSVLSAVSGLKLSMVDEQHQYVLLPVTCVILVGLFALQHYGTHRVGFLFAPIICLWLLCISIIGVYNIINWNPHVYKALSPYYMYRFLQKTQYGGWMSLGGILLCVTGSEAMYADLGHFSQSSIKVCNVSYNINHTTRVSRHILTSGFQFL*
39	735	Monocotyledons	Poales	switchgrass	Panicum virgatum	6	PvHAK6	II:c	>Pvirgatum_v1.1|Pavir.Da00489|Pavir.Da00489.1	MKSPAAMDPESPPPPPGTPPDDEEEKRGGGRKRVPWRMTLSLAYQSLGVVYGDLSTSPLYVYKAAFAEDIQHTDTNDEILGVLSFVFWTLTLVPLLKYVCIVLRADDNGEGGTFALYSLLCRHARAALLPPGRSAAGDDDHFFDARKAPAESGNAVTLGGRGGGAAASVRRLLERHKVLQRVLLVLALVGTCMVIGDGVLTPAISVFSAVSGLELSMEKEHHKYVELPIACIILVCLFALQHYGTHQVGFIFAPIVITWLLCISMIGVYNIIHWEPNVYRALSPYYMYKFLRKTQRGGWMSLGGILLCVTGSEAMFADLGHFNQLSIQIAFTCMVYPALILAYMGQAAYLCRHHTMESDYRIGFYVSVPEKIRWPVLAIAILAAVVGSQAVITGTFSMI…
39	736	Monocotyledons	Poales	switchgrass	Panicum virgatum	7	PvHAK7	I:a	>Pvirgatum_v1.1|Pavir.J35501|Pavir.J35501.1	MAQAAAAADHDGGSKELEIVIVDLEQSEVDDAPPEMRRQDSLYAAATRAAGASQHGQDGWARTARLAFQCVGILYGDIGTSPLFVYSSTFRSSSTASSSSPSSRGTFALYTLISRHAKVSLIPNQQAEDELVSYNRGKPPATLRRAQWMKELLETNKAVKISLFLLTMLATAMVISDAILTPAISVLSAVGGLKEKAPYLTTDEIVWITVGILVVLFAIQRFGTDKVGYLFAPVILLWLLLIGGVGVYNLIKYDTGALRAFNLKYIIDYFRRNKKKGWVSLGGILLCFTGTEALFADLGYFSIRSIQLSFGFGLVPSVLLAYIGQAAYLRVHPENVANTFYRSTPVSLFWPTFILAIAASIIGSQAMISCAFATISHSQTLSCFPRVKILHTSRQYSGQ…
39	737	Monocotyledons	Poales	switchgrass	Panicum virgatum	8	PvHAK8	III	>Pvirgatum_v1.1|Pavir.J02393|Pavir.J02393.1	METTSSTNEHTGRGTMWELERNLDQPMDAEAGRLRNMYREKTYPTLVLLQLAFQSLGVVFGDLGTSPLYVFYNIFPREIEDTEQVIGALSLIIYSLTLIPLVKYVFIVLRANDNGQGGTFALYSLLCRHAKINTIPNQHRTDEDLTTYSRHIYDEKSLAAKIKRWLEGHQFRKNAILILVLFGTCMAVGDGILTPAISVLSATGGIQVEEPKMRNDVVVIVSVVILIGLFSMQHFGTDKVSWLFAPIVFVWYILIGILGAVNISKYDQSVLKAFNPIYVYRYFKRGKTSWASLGGIMLSITGTEALFADLSYFPVQAIQIAFTVVVFPCLLLQYTGQAAYIAQNRSSVVHAFYYSLPDSVRWPSFIVATAAAVVASQATISMTYSIIKQALALGCFPRV…
39	738	Monocotyledons	Poales	switchgrass	Panicum virgatum	9	PvHAK9	III	>Pvirgatum_v1.1|Pavir.J22678|Pavir.J22678.1	MLMASISDSEATNRGSMWELDQNLDQPMDEEASQLKNMYIEKKFSSILLLRLAFQSLGVVFGDLGTSPLYVFYNIFPHGVDDDEDVIGALSLIIYTLTLIPLMKYVFVVLRANDNGQGGTFALYSLLCRHAKVSTIPNQHKTDEELTTYSRQTYEENSLAAKVKRWLEGHAYKKNCLLILVLIGTCTAIGDGILTPAISVLSASGGIRVQNQNMSTDVVVIVAVVILIGLFCMQHYGTDKVGWLFAPLVLLWFILIGSVGVVNIHKYNSSVLKAYNPVYIFRYFKRGKSEIWASLGGVMLSITGTEALYADLCHFPVLAIQIAFTLVVFPCLLLAYTGQAAYIIDHKDHVADAFYRSIPGPIYWPAFIIATLAAVVASQATISATYSIIKQALALGCFP…
39	739	Monocotyledons	Poales	switchgrass	Panicum virgatum	10	PvHAK10	I:a	>Pvirgatum_v1.1|Pavir.Ia01483|Pavir.Ia01483.1	SLTGTEALFADLGYFSIRSIQMSFTFSLLPSVLLTYIGQAAYLRKHTDMRVTDIPNVFFNSIPSSLFWPTFVLALITSVIGSQAMISCAFATMSHLQALNCFPRIKILRTSRRYSGQLYIPEVNIFLCIAACVVTISFRTTGFIAKAHEICVVLVMVITTLLMTIVMLLVWKVNIWWIAIFFIVYISTESIYTAAVLYKFAYGPYVPMAMSAVLMLIMIVWHYVHVKRYKYELEHTVSRDEVKDLLERRDLKRVPGLGLFYTELVQGIPPIFPHLIEKIPTIHSVIVFITVKRLPIPYVDASERFLFRQVEPKEFMVFRCVARYGYRDKLEMANDFVKVLVEYLQYYVRDLNLYGVGDEPLKIIFHSARVDSFTWERKPSGHVIYAEEMLTPAQSFSEL…
39	740	Monocotyledons	Poales	switchgrass	Panicum virgatum	11	PvHAK11	II:c	>Pvirgatum_v1.1|Pavir.Ia03420|Pavir.Ia03420.1	MDLEFGRRLRSPKRDSWKTTLLLAYQSLGVVYGDLSISPLYVYKSTFAEDIQHSETNEEIFGVLSFVFWTLTLIPLIKYVSIVLRADDNGEGGTFALYSLICRHANVSLLPNRQIADEELSTYKLECPPDITHKSRIKVWLEKHRKLRIALLIMVMIGTCMVIGDGVLTPAISVFSAVSGLEFSLSKDHREYAVIPITCVILAFLFALQHYGTHRVGFLFAPIVLAWLFCISAVGLYNIIHWNPHIYQALNPYYMFKFLKKTRKYGWMSLGGILLCMTGSEAMFADLGHFSYSAIQLAFTCLVYPALILAYMGQAAYLSKHHDFYSSSQVGFYIAVPDKIRWPVLVLAILASVVGSQAIISGTFSIINQSQSLSCFPRVKVVHTSEKIHGQIYIPEINW…
39	741	Monocotyledons	Poales	switchgrass	Panicum virgatum	12	PvHAK12	I:a	>Pvirgatum_v1.1|Pavir.Ia01501|Pavir.Ia01501.1	MAHAGAGGGGIEIVPHSSDLELDLPPGNSLRQDSLYRDATRPAHHHAGHHGQESWARTLRLAFQCVGIMYADLGTSPLYVYSNTFKKGVGHPDDVLGVLSIIIYSFILFTMVKIVFIALYANDEGDGGTFALYSLISRYAKICLIPNQQAEDELVLRYKHHPKPSATLRRAQWMKNLLETSKAAKISLFFLTILATALAISDCMLNPPISVLAAVNGLKLRAPHLTKDAEVWITVGVLVVFFSVQRFGTDKIGYTFAPVVTVWLLLISGIGIYNVIKYDIGTLRAFNPKYIVDYFRRTKKKGWVSLGEILLCVTGTEALFADLGYFSIRSIQLSSTFGLLPSVLLTYIGQAAYLRKHMGMDISNAFFNSVPSSLFWPTFILALITAVIGSQAMISCAFA…
39	742	Monocotyledons	Poales	switchgrass	Panicum virgatum	13	PvHAK13	V	>Pvirgatum_v1.1|Pavir.Gb00540|Pavir.Gb00540.1	MASSAASGMRKAPSLEWRWVSTEEDDEEDRGGRGGDAAVGAVGRGGSFESEDEEDAEDEDEREGKKRLIRTVPSVDWFDVEGNEVSVGQQVEDTEEFDFGRTMFLALQTLAVVFGDIGIGPLYTFDVMFNKYPIQGEEDVLGALSLVLYTLILMPLVKYVLVVLWANDDGEGGIFALYSLICRNAKVSLIPNQVHSEKRMSSFRLKLPTPELERSIKVKEKLESSLLLKKLLLGLVLFGTSMFISNGVITPAMSVLSAVSGLKVGIRNTSQDVVVMISVALLVILFSVQRYATSKVGFALGPSLLVWFCCLGGIGIYNLSLFGPTAFMAFNPLYIIYYFGRNPFQAWLSLGGCLLCATGSEAIFSNLCHFPVRYVQYMFMLLVLPCLVLAYLGQAAFLI…
39	743	Monocotyledons	Poales	switchgrass	Panicum virgatum	14	PvHAK14	I:a	>Pvirgatum_v1.1|Pavir.Gb01803|Pavir.Gb01803.1	MKKAQMSLEVEDRPSVEPTKQLKRQDSLYGDAEKVSSAKYHGSEGSWSRLLQLAFQSVGIIYGDVGTSPLYAISSTFPDGIKNRDDLLGVLSLILYTLILIPMVKYVFIVLYADDHGDGGTFALYSLISRHAKVRLIPNQQAEDAMVSNYGIEAPSSQLRRAQWLKEKLESSMAAKISLFTITILGTSMVMGDGTLTPAISVLSAVSGIREKVPSLTETQVVWISVPILFALFSVQRYGTDKVGYSFAPIITVWFVLIAGTGMYNLVVHDIGVLRAFNPMYIIDYFRRNGKEGWISLGGVILCVTGTEGMYADLSHFNIQAIQISFNTVLFPSVALCYMGQTAYLRKFPEDVTDTFFRSIPAPLFWPTFITAILSAIIASQAMLSGAFAILSKALSLGC…
39	744	Monocotyledons	Poales	switchgrass	Panicum virgatum	15	PvHAK15	I:a	>Pvirgatum_v1.1|Pavir.Gb01804|Pavir.Gb01804.1	MIKYVFIVLYANDNGDGGTFALYSLISRYAKVSLIPNQQAEDAMVSSYCLDTVSAPMRRAQRMKKSLENSKVAKVAIFLLTILGTSMVISDGALTPAISVLSAVSGLQEKAPQLKQGQIVWISVFILVVLFSVQRFGTDRVGYSFAPIILLWFLCIGGIGFYNLIKYDVGVLRAFYPKYIVDYFKRNGKDAWISLGGILLCFTGTEAMFADLGHFNVRAVQISFSFTLFPAVSLAYIGQAAFLRKHPEHVLDTFYRSIPGPLFWPTFIIAIAAAIVASQAMISGAFSIIQQSQTLGCFPRVKVLHTSKLYEGQVYIPEVNFALGLLCVIITLAFQTTTNIGNAYGICVTSVMVITTILLVIVMLLVWRVSIWLVIPFCLVFGFVELVYLSSVLYKFKEG…
39	745	Monocotyledons	Poales	switchgrass	Panicum virgatum	16	PvHAK16	I:a	>Pvirgatum_v1.1|Pavir.J01241|Pavir.J01241.1	MSLEVEDRPSVEPTKQLKRQDSLYGDAEKVSSAKYHGSEGSWSRLLQLAFQSVGIIYGDVGTSPLYAISSTFPDGIKNRDDLLGVLSLILYTLILIPMVKYVFIVLYADDHGDGGTFALYSLISRHAKVRLIPNQQAEDAMVSNYGIETPSSQLRRAQWLKEKLESRMAAKISLFTITILGTSMVMGDGTLTPAISVLSAVSGIREKVPSLTETQVVWISVPILFALFSVQRYGTDKVGYSFAPIITVWFVLIAGIGMYNLVVHDIGVLRAFNPMYIVDYFRRNGKDGWISLGGVILCVTGTEGMYADLSHFNIQAIQISFNTVLFPSVALCYMGQTAYLRKFPEDVADTFFRSIPAPMFWPTFITAILSAIIASQAMLSGAFAILSKALSLGCFPSVQ…
39	746	Monocotyledons	Poales	switchgrass	Panicum virgatum	17	PvHAK17	I:a	>Pvirgatum_v1.1|Pavir.J01240|Pavir.J01240.1	MSNYLDLTIINNMFTYTMHHAKQDIWIRTLRLAFQCIGVIYGDIGTSPLYVYASTFPSGISNVDDLYGVLSLILYSIILLPMIKYVFIVLYANDNGDGGTFALYSLISRYAKVSLIPNQQAEDAMVSSYCLDTVSAPMRRAQLMKKSLENSKVAKVAIFLLTILGTSMVISDGALTPAISVLSAVSGLQEKAPQLKQGQIVLISVFILVVLFSVQRFGTDRVGYSFAPIILLWFLCIGGIGFYNLIKYDVGVLRAFYPKYIVDYFKRNGKEAWISLGGILLCFTGTEAMFADLGHFNVRAVQISFSFTLFPAVSLAYIGQAAFLRKHPEHVLDTFYRSIPGPLFWPTFIIAVAAAIIASQAMISGAFSIIQQSQTLGCFPRVKVLHTSKSYEGQVYIPE…
39	747	Monocotyledons	Poales	switchgrass	Panicum virgatum	18	PvHAK18	I:a	>Pvirgatum_v1.1|Pavir.Ea03843|Pavir.Ea03843.1	MAESQHTSSNGAAHGDVDPQFASEKMKPKRLQRFDSLHMEAGKIPGVSTHAAKAGWATTLHFAFQSIGVVYGDMGTSPLYVFSSTFTDGINNTDDLLGVMSLIIYTVILLPLIKYCFIVLRANDNGDGGTFALYSLISRYARISLIPNQQAEDAMVSRYKLESPTNRTKRAHWIKNKMENSPKFKVMLFLVTILATSMVIGDGVLTPCISVLSAVGGIKQKATTLTQGQIAGIAIAILIVLFLVQHFGTDKVGYTFAPIILTWFMLIAGIGIYNLTKHDTSVLKAFNPKYIVDYFKRNGKQGWISLGGVILCITGTEAMFADLGHFNVRAIQIGFSVVLFPSVLLAYIGQAAYLRVYPENVANTFYKSIPGPLYWPTFVVAVAAAIIASQAMISGAFAI…
39	748	Monocotyledons	Poales	switchgrass	Panicum virgatum	19	PvHAK19	II:a	>Pvirgatum_v1.1|Pavir.Ea03966|Pavir.Ea03966.1	MDAEAGVVGADQLPRRQYYMNLLLLAYQSFGVVYGDLSTSPLYVYKSTFAGKLRQYQDEETVFGVLSLIFWTFTLIPLLKYVTIVLSADDNGEGGPFALYSLLCRHAKLSLLPNQQAADEELSTYYRNGFAPRNGSAPWLRRFLEKHKKMRTVLLLIVLCGASMVIGDGILTPAISVLSSMSGLQVRATGLEHRSVVLLSCIVLVGLFALQHRGTQKVAFLFAPIVIIWLFSIGGIGLYNILHWNPNIYQALSPYYMVKFFRKTGKDGWIALGGILLSMTGSEAMFADLGHFTSASVRVAFVTVIYPCLILQYMGHAAFLSKNTFHMPTGFYDTIPEPVFWPVFVVATLAAVVGSQAVISATFSIVKQCHALGCFPRVKVVHTSRWIYGQIYIPEINWI…
39	749	Monocotyledons	Poales	switchgrass	Panicum virgatum	20	PvHAK20	I:a	>Pvirgatum_v1.1|Pavir.Ab01788|Pavir.Ab01788.1	MSAAESPGAAAERLRRHDSLYGDAEKVSHDKYHGSGVRISLKRHAVAVSSFSSRAGLFFIGMTGSWARTLMLAFQSIGVVYGDIGTSPLYVYSSTFPGGIRHPDDLLGVLSLILYTLILIPMLKYVFVVLHANDDGDGGTFALYSLISRYAKIRMIPDHQTEDATVSNYSVDTRLRRAQRLKEKLESSNAAKIGLFTITILGTSMVMGDGTLTPAISVLSAVSGIREKAPNLTQLQVVWISVAILFVLFSVQRFGTDKVGYSFAPIISVWFLLIAGTGMYNLAVHDATILRAFNPMYIVQYFSRNGEEAWVSLGGVILCITGAEAMFADLGHFNIRAIQISFTCILFPSVALCYMGQAAYLRRFPENVADTFFKSIPEPMFWPVFVVAIMAAIIASQAM…
39	750	Monocotyledons	Poales	switchgrass	Panicum virgatum	21	PvHAK21	II:c	>Pvirgatum_v1.1|Pavir.Ab02926|Pavir.Ab02926.1	MDLEAAGGAAAAHGKRWRGESWRATLLLAYQSLGVVYGDVATSPLYVYKSAFAGDDIQHSAGNEEIYGVLSFVFWTLTLITLVKYVLIVLRADDGGEGGTFALYSLICRHVRAGLLPGGGTRDELMEEDKVTGRRGERPVSRVRAVLEKYRVLQRLLLLFALLGTCMVIGDGVLTPAVSVFSAVSGLELSMEKEQHKYIELPVACAILICLFALQHYGTHKVGFLFAPIVCIWLLCISAIGLYNIIHWDHHVYRALSPYYMYQFLKKTQTGGWMSLGGILLCVTGSEAMYADLGHFSQSSIQIAFISVVYPALVLAYMGQAAFISQHHNFESSYHIGFYVSVPESLRWPVLVIAILAAVVGSQAIITGTFSIIKQCSSLSCFPGVKLVHTSSTVHGQIY…
39	751	Monocotyledons	Poales	switchgrass	Panicum virgatum	22	PvHAK22	I:a	>Pvirgatum_v1.1|Pavir.Ib03821|Pavir.Ib03821.1	QDSWWRTLRLAFQCVGILYGDVGTSPLYVYSATFDHGVGHPDDVLGVLSLIIYSFVLFTVIKIVFVALHANDNGDGGTFALYSLISRYAKVSLIPNHQSEDELVSSYSKHGKPSATLRRANWLKNLLETSKSAKISLFLLTILAIAMVISDAVLTPPISVLSAVGGLREKVPGLTTDQIVWITVAILVVLFAIQRFGTDKVGYSFAPIILLWLLLIGGVGLYNLIKYDVGVLRSFNPKYIIDYFRRNKKEGWVSLGDILLVFTGTEALFANLGYFSIRSIQLSFSFGLLPSVLLTYIGQAAYLRKHPEHFDDIFYRSVPSTLFWPTFILAIAASIIGSQAMISCAFATVSHLQTLSCFPRVKILHTSRRFHGQLYVPEVNLLLCVAACLVTVSFKTTTI…
39	752	Monocotyledons	Poales	switchgrass	Panicum virgatum	23	PvHAK23	I:a	>Pvirgatum_v1.1|Pavir.Ib03683|Pavir.Ib03683.1	MAHAGAGGGGGGLEIVPHSGDLELDLPPAGNSLRQDSLYRDATRPAHHHAGHHGQESWVRTLRLAFQCVGIMYADLGTSPLYVYANTFKKGVGHPDDVLGVLSIIIYSFVLFTMVKIVFIALYANDEGDGGTFALYSLISRYAKICLIPNQQAEDELVPRYKHHPKPPATLRRAQWMKNLLETSKAAKISLFFLTILATALAISDCMLNPPISVLAAVNGLKLRAPHLTKDAEVWITVGILVVFFSVQRFGTDKIGYTFAPVVTVWLLLISGIGIYNVIKYDIGTLRAFNPKYIVDYFRRTKKKGWVSLGEILLCVTGTEALFADLGYFSIRSIQLSSTFGLLPSVLLTYIGQAAYLRKHMSMDISNAFFNSVPSSLFWPTFILALITAVIGSQAMISC…
39	753	Monocotyledons	Poales	switchgrass	Panicum virgatum	24	PvHAK24	I:a	>Pvirgatum_v1.1|Pavir.Ib03819|Pavir.Ib03819.1	MRFHSGGSVSGMAQAAAADHDNKEEEIVIVDLEQSEVDDDAAPEMRRQDSLYAAATRAAGAGHNGQDGWARTLRLAFQCVGILYGDIGTSPLFVYSSTFRDGVGHPDDLLGALSLIIYSFLLFTVIKYVYIALRANDDGDGGTFALYTLISRHAKVSLIPNQQAEDELVSNKYNRGKPPATLRRAQWMKELLETNKAVKISLFLLTMLATAMVISDAILTPAISVLSAVGGLKEKAPYLTTDEIVWITVGILVVLFAIQRFGTDKVGYLFAPVILLWLLLIGGVGVYNLIKYDTSALRAFNLKYIIDYFRRNKKKGWVSLGGILLCFTGTEALFSDLGYFSIRSIQLSFGFGLVPSVLLAYIGQAAYLRVHPEDVANTFYKSTPVSLFWPTFILALAAS…
39	754	Monocotyledons	Poales	switchgrass	Panicum virgatum	25	PvHAK25	II:c	>Pvirgatum_v1.1|Pavir.Ib01587|Pavir.Ib01587.1	MDLEFGRGLRSPKRDSWKTTLLLAYQSLGVVYGDLSISPLYVYKSTFAEDIQHSETNEEIFGVLSFVFWTLTLIPLIKYVSIVLRADDNGEGGTFALYSLICRHANVSLLPNRQIADEELSTYKLECPPDITDKSRIKVWLEKHRKLRIALLIMVMIGTCMVIGDGVLTPAISVFSAVSGLEFSLSKDHREYAVIPITCVILAFLFALQHYGTHRVGFLFAPIVLAWLFCMSAVGLYNIIHWNPHVYQALNPYYMFKFLKKTRKYGWMSLGGILLCMTGSEAMFADLGHFSYSAIQLAFTCLVYPALILAYMGQAAYLSKHHDFYSSSQVGFYIAVPDKIRWPVLVLAILASVVGSQAIISGTFSIINQSQSLSCFPRVKVVHTSEKIHGQIYIPEINW…
39	755	Monocotyledons	Poales	switchgrass	Panicum virgatum	26	PvHAK26	I:a	>Pvirgatum_v1.1|Pavir.Ib03820|Pavir.Ib03820.1	MAPHGSAARGSMEIVPYSGELDLELPPAVVDVKRQDSLYRDATMPAHAGHHGQESWVRTLRLAFQCVGILYADLGTSPLYVYANTFKKGVGHPDDVLGVLSIIIYSFILFTMIKIVFIALYANDDGDGGTFALYSLISRYAKVCLIPNQQAEDELVSRYRHRAKPSATLRRAQWMKNLLETSKAAKISLFFLTILATALAISDSMLTPPISVLAAVNGLRVRAPHLTTDQTVWITVGILVVLFAVQRFGTDKIGYAFAPVVFVWLLLMAAIGIYNMVKYDIGVLKAFNAKYIVDYFRRNKKKGWISLGEILLCFTGTEALFADMGYFSIRSIQLSFTFGLLPSVLLTYIGQAAYLRKHIDMSVADIPNVFFNSIPRSLFWPTFVLALITSVIGSQAMIS…
39	756	Monocotyledons	Poales	switchgrass	Panicum virgatum	27	PvHAK27	V	>Pvirgatum_v1.1|Pavir.J08656|Pavir.J08656.1	MFLALQTLAVVFGDIGIGPLYTFDVMFNKYPIQGEEDVLGALSLVLYTLILMPLVKYVLVVLWANDDGEGGIFALYSLICRNAKVSLIPNQVHSEKRMSSFRLKLPTPELERSIKVKEKLESSLLLKKLLLGLVLFGTSMFISNGVITPAMSVLSAVSGLKVGIHNTSQDVVVMISVALLVILFSVQRYATSKVGFALGPSLLVWFCCLGGIGIYNLSLFGPTAFKAFNPLYIIYYFGRNPFQAWLSLGGCLLCATGSEAIFSNLCHFPVRYVQYMFVLLVLPCLVLAYLGQAAFLIANPKSSEQVFFSSIPIGVFWPVFLVANLAALIASRTMTVAIFQCLKQSIALGCFPRLKIVHTSRKFMAKIYIPVVNWLLLLSCLGFIVLFRSIYDVGNAYAI…
39	757	Monocotyledons	Poales	switchgrass	Panicum virgatum	28	PvHAK28	I:a	>Pvirgatum_v1.1|Pavir.J23816|Pavir.J23816.1	MAEPQHTSSNGAAHGDADPQYASEKMPPKRLQRFDSLHMEAGKIPGVSTHAAKAGWATTLHFAFQSIGVVYGDMGTSPLYVFSSTFTDGINNTDDLLGVTSLIIYTVILLPLIKYCFIVLRANDNGDGGTFALYSLISRYARISLIPNQQAEDAMVSRYKLESPTNRTKRAHWIKNKMENSPKFKVMLFLVTVLATSMVIGDGVLTPCISVLSAVGGIKQKATTLTQGQIAGIAIAILIVLFLVQRFGTDKVGYTFAPVILTWFMLIAGIGIYNLTKHDISVLKAFNPKYIVDYFKRNGKQGWISLGGVILCITGTEAMFADLGHFNVRAIQIGFSVVLFPSVLLAYIGQAAYLRVYPENVANTFYKSIPGPLYWPTFVVAVAAAIIASQAMISGAFAI…
39	758	Monocotyledons	Poales	switchgrass	Panicum virgatum	29	PvHAK29	II:c	>Pvirgatum_v1.1|Pavir.Aa00454|Pavir.Aa00454.1	MDLEAAGGAAAAHGKRWRGESWRATLLLAYQSLGVVYGDVATSPLYVYKSAFAGNDIQHSAGNEEIYGVLSFVFWTLTLITLVKYVLIVLRADDGGEGGTFALYSLICRHVRAGLLPGGGTRDELMEEEKVTGRHGERPVSRVRAVLEKYRVLQRLLLLFALLGTCMVIGDGVLTPAVSVFSAVSGLELSMEKEQHKYIELPVACAILVCLFALQHYGTHKVGFLFAPIVCIWLLCISAIGLYNIIHWDHHVYRALSPYYMYQFLKKTQTGGWMSLGGILLCVTGSEAMYADLGHFSQLSIQIAFISVVYPALVLAYMGQAAFISQHHNFESSYHIGFYVSVPESLRWPVLVIAILAAVVGSQAIITGTFSIIKQCSSLNCFPGVKIVHTSSTVHGQIY…
39	759	Monocotyledons	Poales	switchgrass	Panicum virgatum	30	PvHAK30	I:a	>Pvirgatum_v1.1|Pavir.Aa01905|Pavir.Aa01905.1	MSAEAAESPGAAAERLKRHDSLYGDAEKVSNEKYHGSGGSWARTLMLAFQSIGVVYGDIGTSPLYVYSSTFPGGIRHPDDLLGVLSLILYTLILIPMLKYVFVVLHANDDGDGGTFALYSLISRYAKIRMIPDHQTEEATVSNYSADTRLRRAQRLKEKLESSNAAKIGLFTITILGTSMVMGDGTLTPAISVLSAVSGIREKAPNLTQLQVVWISVAILVVLFSVQRFGTDKVGYSFAPIISVWFLLIAGTGLYNLAVHDATILRAFNPAYIVQYFSRNGKEAWVSLGGVILCITGAEAMFADLGHFNIRAIQISFTCILFPSVALCYMGQAAYLHRFPENVGDTFFKSIPEPMFWPVFVVAIMAAIIASQAMLSGAFAILSKAQSLGCFPRVEVVHT…
39	760	Monocotyledons	Poales	switchgrass	Panicum virgatum	31	PvHAK31	II:b	>Pvirgatum_v1.1|Pavir.Db00431|Pavir.Db00431.1	MDVEGGLPAVQSSTGRRTASSSSWYGDLCISPVYVYKNTFSGKLRLHEEDEEILGVLSLVFWSLTLIPLLKYIILVLGADDNGEGGTFALYSLMCRRSRIGLLNNIHEGSMSSYNQKEPREELKSSLAIKCFFEKHYSLRVVLLLFVLMGTSMVIGDGVFTPTMSVLSAVSGLRIKFPELHEIVYPCLILAYMGDAAYLSKHREDLESSFYKALPDRVFWPILVIATLATVVGSQAIISATFFIISQCRALGCFPRIKVIHTSSQVHGQIYIPEVNWVLMFLCLAVTVGFRDTEMIGNAYGLAVILVMFATTCLMFLVITTVWNRNVVLAALFTIGFGSIELMYLSACLAKVPHGGWLPLLLSLITLLAMSTWHYGTKKEYELQNKVCLDRFLSLSSGI…
39	761	Monocotyledons	Poales	switchgrass	Panicum virgatum	32	PvHAK32	II:c	>Pvirgatum_v1.1|Pavir.Db01537|Pavir.Db01537.1	MVVYPSLILAYMGQAAYISQHHSFEKNHHIGFYVSVPEKIRWPVLGIAILAAVVGSQAVITGTFSVIKQCYSLNCFPRVKIVHTSSTLHGRIYIPEINWILMLLCLALTIGFRDTKHMANAQGLAVITVMIVTTCLMSLVIIICRNKNIVFALAFLLFFGAIEAIYFSASLVKFHEGAWVPIIISFIFLLVMCVWHYGTAKKYEFDVDNKVSISWLLNLGPSLGIVRVRGIGLIHTDLISGIPAIFSHFVTNLPAFHQVLVFLCIRSVSVPHVQPEELYRVVVRYGYRDVQQDSLEFEKALVSSIAEFIRSGDSDINGYLDGSDSPYEKLSVISKGLPFQEDGEAEGSPESSTRKETDPKLVSSKSRRVRFVLPENAQMNGEVRSELQELTEARETGMS…
39	762	Monocotyledons	Poales	switchgrass	Panicum virgatum	33	PvHAK33	II:c	>Pvirgatum_v1.1|Pavir.Db01577|Pavir.Db01577.1	MYTHSRRFDFFLFRCGGLRGHVDGDFVVLVGLQSWRSEQVLAYQSLGVVYGEVVTLPLYVYKSAFAGGDIEHSEGNEEIYGVFSLVFWTLTLITLLKYVLVVLRADDDGEGGTFALYSLICRRVGAGLLPGAGDDLKDQGDGAAPPPASSVRTALQQRRELQWLLLLFALLGTSMVIGDGVLTPAVSVLSAVSGLKLSMVDEHHQYVLLPVTCAILVGLFALHHYGTHRVGFLFAPVICLWLLCISVIGIYNIIYWNPHVYKALSPYYMYRFLQKTQYGGWMSLGGILLCVTGSEAMYADLGHFSQSSIKVCNVSYNINHTTRVSLHISTSGFQFLCCIHF*
39	763	Monocotyledons	Poales	switchgrass	Panicum virgatum	34	PvHAK34	II:c	>Pvirgatum_v1.1|Pavir.Db00722|Pavir.Db00722.1	MKSPPAMDPEAPPPPGTPPDDEEEKRGGRKRVPWRMTLSLAYQSLGVVYGDLSTSPLYVYKAAFAEDIQHTDTNDEILGVLSFVFWTLTLVPLLKYVCVVLRADDNGEGGTFALYSLLCRHARAALLPPGRSAAGDDDQFFDAAGAKKAPAENGNAVTLGGRGGGAAASVRRLLERHKVLQRVLLVLALVGTCMVIGDGVLTPAISVFSAVSGLELSMEKEHHKYLELPIACIILVCLFALQHYGTHRVGFIFAPIVITWLLCISMIGVYNIIHWEPTVYRALSPYYMYKFLKKTQRGGWMSLGGILLCVTGSEAMFADLGHFNQVSIQIAFTCMVYPALILAYMGQAAYLCRHHTMESDYRIGFYVSVPEKIRWPVLAIAILAAVVGSQAVITGTFSM…
39	764	Monocotyledons	Poales	switchgrass	Panicum virgatum	35	PvHAK35	IV	>Pvirgatum_v1.1|Pavir.J31829|Pavir.J31829.1	MSCLNSEQGGNIRKDLFLAYKTLGVVFGGLVTSPLYVYPSMNLASPTKDDYMGLYSIMFWTLTLIGVVKYVGIALNADDHGEGGTFAMYSLLCRHADIGILPSKKVHSEEEPLIHNQSAVDRRPSWLGKFFERSITARRVLLFMAILGMCMLIGDGILTPAISVLSAIDGLRGSFPSVSKPVVEALSAAILIGLFLLQKYGTSKVSFLFSPIMAAWTFTTPIIGVYSIVRYYPGIFKAISPHYIVHFFLRNKKEGWRMLGGTVLGITGAEAMFADLGHFSKKGIQIAFMFSIYPSLVLTYAGQTAYLINNVNDFSDGFYKFVPRPVYWPMFVIATLAAIVASQSLISATFSVIKQSVVLDCFPRVKVVHTSQHKEGEVYSPETNYILMVLCVGVVLGFG…
39	765	Monocotyledons	Poales	switchgrass	Panicum virgatum	36	PvHAK36	I:a	>Pvirgatum_v1.1|Pavir.J23555|Pavir.J23555.1	MALETDKQDPTGKKGVSEILQRHDSLYGDAEKVSSAHHHGSQDNWIRTLRLAFQCIGVIYGDIGTSPLYVYASTFSSGISNVDDLYGVLSLILYSIILLPMIKYVFIVLYANDNGDGGTFALYSLISRYAKVSLIPNQQAEDAMVSSYCLDTVSAPMRRAQWMKRSLENSKVAKVAIFLLTILGTSMVISDGVLTPAISVLSAVSGLQEKAPQLKQGQVVLISVFILVVLFSVQRFGTDRVGYSFAPIILLWFLCIGGIGFYNLIKYDVGVLRAFYPKYIVDYFKRNGKDAWISLGGILLCFTGTEAMFADLGHFNVRAVQISFSFALFPAVSLAYIGQAAFLRKHPEHVLDTFYRSIPGPLFWPTFIIAVAAAIIASQAMISGAFSIIQQSQTLGCFP…
39	766	Monocotyledons	Poales	switchgrass	Panicum virgatum	37	PvHAK37	II:a	>Pvirgatum_v1.1|Pavir.J22586|Pavir.J22586.1	MQLHWTGLLVLAYQSCGVVYGDLSTSPLYVYKGTFSGSLHRFLGEEAVVFGVFSVVFWTVTLIPLLKYVFIVLSADDNGEGGTFALYSLLVRHAKFSLMPNQQAADEELSAYYRPGYSTEDTPMLRALRSFLERHRMSRTCLLVMVLFGASLVIGDGVLTPAMSVLSSFSGLQVHSSALTHVEVVLLSCAVLVGLFTLQHWGTRRVAFLFAPVVVLWLLLLAALGVYNIVVWNPRIVRALSPYYVVSFFQRTGKEGWISLGGVLLSMTGTEAMYADLGHFTAASIRVAFVGLIYPCLVLQYMGQAAFLSKSPNCNIHFIFFESIPRLIFWPVLVIATLAAIVGSQAVISATFSIVRQCTALGCFPRVKIVHTSNRIHGQIYSPEINWILMLVCLGVTVG…
39	767	Monocotyledons	Poales	switchgrass	Panicum virgatum	38	PvHAK38	IV	>Pvirgatum_v1.1|Pavir.Fb01945|Pavir.Fb01945.1	MPVPVTRLASDANLKFHSKKSSLQPRMLKFLEGSVIAQAVITYLVLIGTCMVMGDGALTPSISVLSAVQGIQSRSSKITQGHVVLLCVIILVLLFLYQRYGTSRVSFSFSPIMLVWFVLIASIGLYNMIKYYPPVLKAISPHYIYIFFAKNKRAGWEQLGTVVLCITGAEAMFADLGHFNKKSIQMAYSCLVYPSLILAYAGQAAFLIKNPSKLSTTFYSSIPEPLFWPMFIVATLSAVVASQALISASFSIIRQSIALGCFPRVTMNHTSKKYEGQVYSPEINYFLMIACILITVGFKGGPEIGQAYGVAVIWVMLITTHLITVVMVIIWQIHIALAGLFYAVYTVLEGLFTISLLYKIAQGGWVPFAITAFFLIITLSWTYGRSKKNEYETNNLMDS…
39	768	Monocotyledons	Poales	switchgrass	Panicum virgatum	39	PvHAK39	I:a	>Pvirgatum_v1.1|Pavir.J35359|Pavir.J35359.1	SATLRRANWLKHLLETSKSAKSSLFLLTILTIAMVISDAVLTPSISVLSAVGGLKEKVPHLTTDQIVWITVAILVVLFAIQRFGTDKVGYSFAPIILLWLLLIGGVGLYNLIKYDVGVLRSFNPKYIIDYFRRNKKEGWVSLGDILLVFTGTEALFANLGYFSIRSIQLSFSFGLLPSVLLTYIGQAAYLRKHPEHFADIFFRSVPSTLFWPTFILAIAASIIGSQAMISCAFATVSHLQTLSCFPRVRILHTSKRFHGQLYLPEVNLLLCVAACLVTVSFKTTAIIGKAHEICVILVMVITTLLMTIVMLLVWKISIWWIALFFIIYIPIESIYLSSVLYKFTHGPYIPVAMSAVLMVVMIVWHYVHAERYKYELKHTLSPKRAKELLEHHDLKRVAG…
39	769	Monocotyledons	Poales	switchgrass	Panicum virgatum	40	PvHAK40	I:a	>Pvirgatum_v1.1|Pavir.J39162|Pavir.J39162.1	MLFSVQRFGTDKVGYTFAPVISLWFLLIAGIGMYNLVVHDIGVLRAFNPWYIVQYFKRNGKDGWVSLGGIILCVTGTEGMFADLGHFNIRAVQISFNGILFPSVVLCYIGQAAYLRKFPENVGDTFYRSIPGPLFWPTFVVAILAAIIASQAMLSGAFAILSKALSLGCLPRVQVIHTSKKYEGQVYIPEVNFMMGLASIIVTIAFRTTTSIGNAYGICVVTTFSITTHLVTVVMLLIWKKHIIFVLLFYVVFCCTELIYLSSILSKFIQGGYLPFCFALVLMTLMATWHYVHVKRYWYELDHIVPTNQMTTLLEKNDVRRIPGVGLLYTELVQGIPPVFPRLIKKIPSVHSIFLFMSIKHLPIPHVVPAERFLFRQVGPREHRMFRCVARYGYSDSLE…
39	770	Monocotyledons	Poales	switchgrass	Panicum virgatum	41	PvHAK41	III	>Pvirgatum_v1.1|Pavir.J05207|Pavir.J05207.1	MASLSVGEVTNRGSMWELDQNLDRPMDEEAGRLKNMYREKKFSSALLLRLAFQSLGVVFGDLGTSPLYVFYNIFPRGVDNDEDVIGALSLIIYTLTLIPLLKYVFVVLRANDNGQGGTFALYSLLCRHAKINTIPNQHRTDEELTTYSRQTYEENSVAEKIKRWLEAHAYKRNILLILVLIGTCTAIGDGILTPAISVLSASGGIKVQNQNMSTNVVVLVAVVILIGLFSMQHYGTDKVGWLFAPIVLLWFILIGSVGAVNIHKYNNSVLKAYNPIYIYRFFRRRWNYDIWTSLGGVMLSITGTEALFADLCHFPVLAIQIAFTLIVFPCLLLAYTGQAAYIISHKKHVADAFYRSIPDAIYWPAFVIATAAAIVASQATISATYSIIKQALALGCFPR…
39	771	Monocotyledons	Poales	switchgrass	Panicum virgatum	42	PvHAK42	II:c	>Pvirgatum_v1.1|Pavir.J01783|Pavir.J01783.1	MDPEFGVGTAPRKRESWRTTLLLAYQSLGVVYGDLSISPLYVYKSTFAEDIKHSDTNEEIFGALSFVFWTLTLIPLIKYVTVVLRADDNGEGGTFALYSLICRHANVSLLPNRQVADEELSTYKLEYPPEVAQRSRVKDWLEKHKKLHTALLVMVMIGTCMIIGDGVLTPAISVFSAVSGLELSLSKDQHEYAIIPITCAILVFLFALQHYGTHRVGFLFAPIVLSWLLCMSAIGLYNIIHWNPHVYRALNPSYMITFLKKTRKSGWMSLGGILLCMTVYPSLILGYMGQAAYLSKHHNLDASYQIGFYIAVPGSQAIISGTFSIINQSQSLSCFPRVKVVHTSDKIHGQIYIPEVNWMLMILCIAVTVGFRNTKHMGNASERERREALIIAGGQLQVA…
39	772	Monocotyledons	Poales	switchgrass	Panicum virgatum	43	PvHAK43	IV	>Pvirgatum_v1.1|Pavir.Ba02116|Pavir.Ba02116.1	MTTGARSDLEAGHVSSRRRGASAASTPATAGLEQAEAEGGNIRKDLFLAYKTLGVVFGGLVTSPLYVYPSMNLASPTKDDYMGLYSIMFWTLTLIGVVKYVGIALNADDHGEGGTFAMYSLLCRHADIGILPSKKVHSEEEPLIHTQSAVDRRPSWLGKFFERSITARRVLLFMAILGMCMLIGDGILTPAISVLSAINGLREPFPSVSKPVVEALSAAILIGLFLLQKYGTSKVSFLFSPIMAAWTFTTPIIGVYSIVRYYPGIFKAISPHYIVRFFLRNKKEGWRMLGGTVLCITGAEAMFADLGHFSKKGIQIAFLFSIYPSLVLTYAGQTAYLINNVNDFSDGFYKFVPRPVYWPMFVIATLAAIVASQSLISATFSVIKQSVVLDCFPRVKVVH…
39	773	Monocotyledons	Poales	switchgrass	Panicum virgatum	44	PvHAK44	V	>Pvirgatum_v1.1|Pavir.Ba00867|Pavir.Ba00867.1	MESGSGGCRRLRKTESAEMRWVVPGGACEEDEIESSDDGGTDTPAAASGSRGGGGSDDDDGGYEEDEMLRQRLVRTGPRADSFDVEALDVPGVYRHQEFTIGRSIVLTLQTLGVVFGDVGTSPLYTFDVMFNKYPITTKEDVLGALSLVIYTLILIPFLKYTMIVLWGNDDGEGGTFALYSLICRNAKASLLPNQLPSDTRISSFNLKVPSVELERSLKIKERLETSSMLKKLLLMLVLFGTSMVIADGVVTPAMSVMSAVNGLKVGISSVNEGEVVMITVAFLIVLFSLQRFGTSKVGLAVGPALFIWFCCLAGIGIYNIRIYGSQVLHAFNPLYIYYYFERNPTQAWMSLGGCLLCATGLEAMFADLCYFSVRSVQLTFVFLVLPCLLLGYLGQAAF…
39	774	Monocotyledons	Poales	switchgrass	Panicum virgatum	45	PvHAK45	II:c	>Pvirgatum_v1.1|Pavir.Ba00221|Pavir.Ba00221.1	MVAGQRQGAGVGTACEMQSAGRRQRATEDSGGGVGGGGGTGCAAAGVSRLARGLAVITVMLVTTCLMSVVIMLCWHRSPLLALAFFLLFGSVEALYFSASLIKFLEGAWVPILLSLILLAVMFVWHHVTIRKYEYDMHNKVTLEWLLALGDKLGMVRVPGIGLVYTDLTSGVPANFSRFVTNLPAFHRVLVFVCVKSVPVPHVLPAERYLVGRVGPPGHCSYRCIVRYGYRDVHQDVDSFETELVESLATFIKLDALFRCSDAGREARDSSCGYENERENALTVIGSNPLRRHLQLGYDESHDGVSSAHETGVDGIELAAAAPAIKKQVRFAATPCRSPGVDERVLEELHELCEAREAGTAFILGHSHVQTKPGSSLLKKLAVGVGYNFLRRNCRGPDV…
39	775	Monocotyledons	Poales	switchgrass	Panicum virgatum	46	PvHAK46	II:a	>Pvirgatum_v1.1|Pavir.Ba00194|Pavir.Ba00194.1	MDEEIGGAARQAQWKNYCKTLSLLAFQSLGVVYGDLSTSPLYVYRNSLSGRLNAYIDETTIFGLFSLIFWTFTLVPLLKYVIIVLSADDNGEGGPFALYSLLCRHAKFSLLPNQQAADEELSTYYQPDTDRTAVSSPFKRFLEKHRKLRTCLLLFVLFSACMVIGDGVLTPTISVLSAISGLQDPATSGLSNGWIVFIACGVLVGLFALQHRGTHRVAFIFAPIVVLWLLSIGIIGLYNIIRWNPRYFFLRKTGKAIISATFSIVKQCLALGCFPRVKVVHTSRWIHGQIYIPEINWILMVLCLAVAVGFRDITVIGNAYGLACIAVMFVTTCLMSLVIIFVWQKNVLISLLFLVFFGAIEAAYLSAAVMKVLQGGWAPIALAFVFMSIMYVWHYGTRR…
39	776	Monocotyledons	Poales	switchgrass	Panicum virgatum	47	PvHAK47	I:a	>Pvirgatum_v1.1|Pavir.Ba04010|Pavir.Ba04010.1	MAQVQVQPAGATSTLLEMMMMKKPQASSCCSDDMADLERALEAAAPTTVPRQDSLYRDATRAAGGGNHDGQQDGWARTLRLAFQCVGVLYGDIGTSPLYVYSSTFTGGIRHTDDLLGVLSLIIYSFLLFTIIKYVYIALRANDDGDGGTLALYSLISRHAKVSLVPNHQAEDELMHINGDDEAVLAAKPSLRGSVRRRTVQLASPREQRAQWVKQLLETSKPVRISLFLLTVLATAMVITDACLTPAISVLSAVGGLKEKAPNLTTDQIVWITVAILVLLFAVQRFGTDKVGYLFAPVVLLWLLLIGGVGVYNLLRHDVGVLRAFNPKYIPDYFRRNGRDGWVSLGGVLLCFTGTEALFADLGYFSVRSIQLSFAFGLVPAVLLAYIGQAAFLRRYPDQ…
39	777	Monocotyledons	Poales	switchgrass	Panicum virgatum	48	PvHAK48	V	>Pvirgatum_v1.1|Pavir.Ba02179|Pavir.Ba02179.1	MDDGGIQEEPPSARFLTPTRSGGTRWVDGSEVDSSESAAWSLGDERSGETVSAEGSAAATAPASRVSSGTFRRRLGKRPRRVDSLDVEAMSVGGAHGHSSKELTMLSTIAMAFQTLGVVYGDMGTSPLYVFSDVFSKVPIKSEVEILGALSLVMYTIALIPFAKYVFIVLKANDNGEGGTFALYSLICRYAKVSLLPNQQRVDEDISSFRLKLPTSELERAMFVKDCLEKKPLFKNIILFLVLMGTSMVIGDGILTPSMSVMSAVSGLQGQVPGFDTDAVVLVSIIVLLLLFSVQRFGTGKVGFMFAPILGLWFINLGSIGIYNIVKYDISVVRAFNPVYIYLFFQTNGMKAWSALGGCVLCITGAEAMFADLGHFSVKSIQVAFTAVVFPCLLIAYMG…
39	778	Monocotyledons	Poales	switchgrass	Panicum virgatum	49	PvHAK49	II:a	>Pvirgatum_v1.1|Pavir.Bb03664|Pavir.Bb03664.1	MDEEIGGAAARQVQWKIYCKTLSVLAFQSLGVVYGDLSTSPLYVYRNSLSGRLNAYIDETTIFGLFSLIFWTLTLVPLLKYVIIVLSADDNGEGGPFALYSLLCRHAKFSLLPNQQAADEELSTYYQPGTGRPAVSSPFKRFLEKHRKLRTCLLLFVLFSACMVIGDGVLTPTISVLSAISGLQDPATSGLSNGWIVFIACVVLVGLFALQHRGTHRVAFIFAPIVVLWLLSIGIIGLYNIIRWNPRIFVALSPHYIAKFFKKTGRDGWISLGGVLLAITGTEAMFADLGHFTAASIRLAFVGVIYPCLVLQYMGQAAFLSKNMPAVYDSFYLSIPSPLFWPVFVIATLAAVVGSQAIISATFSIVKQCLALGCFPRVKVVHTSRWIHGQIYIPEINWI…
39	779	Monocotyledons	Poales	switchgrass	Panicum virgatum	50	PvHAK50	V	>Pvirgatum_v1.1|Pavir.Bb02820|Pavir.Bb02820.1	MESGSGGGRRLRKTESAEMRWVVPGGACEEDEIESSDDGGADTPAAASGSRGGGGSDDDDDDGYEEDEMLRQRLVRTGPRADSFDVEALDVPGVYRHQEFTMGRSIVLTLQTLGVVFGDVGTSPLYTFDVMFNKYPITAKEDVLGALSLVIYTLILIPFLKYTLIVLWGNDDGEGGTFALYSLICRNAKASLLPNQLPSDTRISSFNLKVPSVELERSLKIKERLETSSMLKKLLLMLVLFGTSMAIADGVVTPAMSVMSAVNGLKVGISSVNEGEVVMITVAFLIVLFSLQRFGTSKVGLAVGPALFIWFCCLAGIGIYNIRIYGSQVLHAFNPLYIYYYFERNPTKAWMSLGGCLLCATGSEAMFADLCYFSVRSVQLTFVFLVLPCLLLGYLGQAA…
39	780	Monocotyledons	Poales	switchgrass	Panicum virgatum	51	PvHAK51	V	>Pvirgatum_v1.1|Pavir.Bb02031|Pavir.Bb02031.1	MDDGGIQEEPPSARFLTPTRSGGTRWVDGSEVDSSESAAFSLGDERSGETVSAEGSAAATGPASRVSSGTFRRRLGKRPRRVDSLDVEAMSVRGAHGHSSKELTMLSTIAMAFQTLGVVYGDMGTSPLYVFSDVFSKVPIKSEVEILGALSLVMYTIALIPFAKYVFIVLKANDNGEGGTFALYSLICRYAKVSLLPNQQRVDEDISSFRLRLPTPELERAMFVKDCLEKKPLFKNILLFLVLMGTSMVIGDGILTPSMSVMSAVSGLQGRVPGFDADAVVLVSIIVLLLLFSVQRFGTGKVGFMFAPILGLWFINLGSVGIYNIVKYDISVVRALNPAYIYLFFQTNGMKAWSALGGCVLCITGAEAMFADLGHFSVKSIQVAFTAVVFPCLLIAYMG…
[truncated: 91 more rows]

## Sheet: Outgroups
Genome No.	Seq No.	Division	Order	Common name	Species	Number	Gene name	Cluster	Accession / Locus	Protein Sequence
[truncated: 42 more rows]
